# Supplementary material for: Temporal Trends, Projections, and Risk Attribution of Colorectal Cancer in Australia, China, Japan, and Korea: GBD 2021 Analysis (1990–2041)
Source: Research Square preprint supplement (doi:10.21203/rs.3.rs-7388179/v1), 2025-09-22
Supplement: Supplementary file 1 [file 09a7f3dac361544644ec26c9.xlsx]

## Sheet: Sheet1
Table S1.Burden of coloretal cancer regarding the sex and age in Australia,China,Japan and Republic of Korea in 2021.
measure_id	measure_name	location_id	location_name	sex_id	sex_name	age_id	age_name	cause_id	cause_name	metric_id	metric_name	year	val	upper	lower
1	Deaths	6	China	1	Male	8	15-19 years	441	Colon and rectum cancer	1	Number	2021	127.45156988526816	167.77289854322902	90.77132908308221
1	Deaths	6	China	2	Female	8	15-19 years	441	Colon and rectum cancer	1	Number	2021	55.873013672803175	71.36058656314223	43.38325379003983
1	Deaths	6	China	1	Male	8	15-19 years	441	Colon and rectum cancer	3	Rate	2021	0.31797063046684204	0.41856569027013835	0.2264594838874323
1	Deaths	6	China	2	Female	8	15-19 years	441	Colon and rectum cancer	3	Rate	2021	0.16153245133375146	0.2063080138054135	0.12542375774783968
1	Deaths	6	China	1	Male	9	20-24 years	441	Colon and rectum cancer	1	Number	2021	289.56431238447755	377.96728506390275	212.80861188328373
1	Deaths	6	China	2	Female	9	20-24 years	441	Colon and rectum cancer	1	Number	2021	121.07574368898291	162.19584704113387	86.35315338434626
1	Deaths	6	China	1	Male	9	20-24 years	441	Colon and rectum cancer	3	Rate	2021	0.745003630027162	0.9724506348359431	0.5475232325714826
1	Deaths	6	China	2	Female	9	20-24 years	441	Colon and rectum cancer	3	Rate	2021	0.3529220406962702	0.4727824714193826	0.25170963385736045
1	Deaths	6	China	1	Male	10	25-29 years	441	Colon and rectum cancer	1	Number	2021	713.450587385068	894.5192697955629	549.0796664631916
1	Deaths	6	China	2	Female	10	25-29 years	441	Colon and rectum cancer	1	Number	2021	268.36119979338673	365.65311461519303	188.3466308620766
1	Deaths	6	China	1	Male	10	25-29 years	441	Colon and rectum cancer	3	Rate	2021	1.5640448726602412	1.9609883321385775	1.20370667877836
1	Deaths	6	China	2	Female	10	25-29 years	441	Colon and rectum cancer	3	Rate	2021	0.6566803788687319	0.8947538840372765	0.460884572763806
1	Deaths	6	China	1	Male	11	30-34 years	441	Colon and rectum cancer	1	Number	2021	2161.5578404812027	2692.197724060054	1670.5458796036748
1	Deaths	6	China	2	Female	11	30-34 years	441	Colon and rectum cancer	1	Number	2021	726.8697723748265	987.236400083898	519.4926127874127
1	Deaths	6	China	1	Male	11	30-34 years	441	Colon and rectum cancer	3	Rate	2021	3.4483519373578537	4.294886337830396	2.6650363050632446
1	Deaths	6	China	2	Female	11	30-34 years	441	Colon and rectum cancer	3	Rate	2021	1.2431608928707503	1.6884643319160102	0.8884850146437663
1	Deaths	6	China	1	Male	12	35-39 years	441	Colon and rectum cancer	1	Number	2021	3138.388331606496	4045.733121811345	2395.9007558513003
1	Deaths	6	China	2	Female	12	35-39 years	441	Colon and rectum cancer	1	Number	2021	1084.4992805714548	1456.1460025323613	789.618885736415
1	Deaths	6	China	1	Male	12	35-39 years	441	Colon and rectum cancer	3	Rate	2021	5.7726929038245185	7.441645970909281	4.406975119134101
1	Deaths	6	China	2	Female	12	35-39 years	441	Colon and rectum cancer	3	Rate	2021	2.1018588895185353	2.822144260203472	1.5303536886094364
1	Deaths	6	China	1	Male	13	40-44 years	441	Colon and rectum cancer	1	Number	2021	4240.750268637167	5609.08464930541	3138.3108766041933
1	Deaths	6	China	2	Female	13	40-44 years	441	Colon and rectum cancer	1	Number	2021	1592.7176015577043	2122.8499820065467	1168.149687764647
1	Deaths	6	China	1	Male	13	40-44 years	441	Colon and rectum cancer	3	Rate	2021	9.037235030950185	11.953218905426839	6.687885679524779
1	Deaths	6	China	2	Female	13	40-44 years	441	Colon and rectum cancer	3	Rate	2021	3.5704450156087093	4.758859404659945	2.618677803324976
1	Deaths	6	China	1	Male	14	45-49 years	441	Colon and rectum cancer	1	Number	2021	7137.42050006738	9791.40507991959	5207.882881076314
1	Deaths	6	China	2	Female	14	45-49 years	441	Colon and rectum cancer	1	Number	2021	2817.99534644832	3821.830486313067	2032.1950831171866
1	Deaths	6	China	1	Male	14	45-49 years	441	Colon and rectum cancer	3	Rate	2021	12.731416138649866	17.465476869881716	9.289591969494772
1	Deaths	6	China	2	Female	14	45-49 years	441	Colon and rectum cancer	3	Rate	2021	5.193496534900778	7.043540157957128	3.745285859223847
1	Deaths	6	China	1	Male	15	50-54 years	441	Colon and rectum cancer	1	Number	2021	12282.238247184741	16824.91945261243	9006.677434761874
1	Deaths	6	China	2	Female	15	50-54 years	441	Colon and rectum cancer	1	Number	2021	5531.188051503292	7380.154701904271	4033.462065571338
1	Deaths	6	China	1	Male	15	50-54 years	441	Colon and rectum cancer	3	Rate	2021	20.088371004463177	27.518211036311612	14.730985850115276
1	Deaths	6	China	2	Female	15	50-54 years	441	Colon and rectum cancer	3	Rate	2021	9.26217945396265	12.358342658132075	6.75418176424486
1	Deaths	6	China	1	Male	16	55-59 years	441	Colon and rectum cancer	1	Number	2021	16353.177798219107	22261.921717505407	11911.686772654502
1	Deaths	6	China	2	Female	16	55-59 years	441	Colon and rectum cancer	1	Number	2021	7966.964056088699	10507.447511174618	5992.692005871978
1	Deaths	6	China	1	Male	16	55-59 years	441	Colon and rectum cancer	3	Rate	2021	29.7961311319366	40.56209422586565	21.703560339154357
1	Deaths	6	China	2	Female	16	55-59 years	441	Colon and rectum cancer	3	Rate	2021	14.46991594367539	19.08404270420688	10.884164782321648
1	Deaths	6	China	1	Male	17	60-64 years	441	Colon and rectum cancer	1	Number	2021	16470.948562372676	21992.395426991905	12313.794948959589
1	Deaths	6	China	2	Female	17	60-64 years	441	Colon and rectum cancer	1	Number	2021	8580.401844747368	11236.940870896655	6500.354468255331
1	Deaths	6	China	1	Male	17	60-64 years	441	Colon and rectum cancer	3	Rate	2021	44.97144648038373	60.0469262699179	33.6209641126937
1	Deaths	6	China	2	Female	17	60-64 years	441	Colon and rectum cancer	3	Rate	2021	23.585609089064587	30.88784179730976	17.868023223466945
1	Deaths	6	China	1	Male	18	65-69 years	441	Colon and rectum cancer	1	Number	2021	24658.672167433666	32724.154216003506	18252.2034374156
1	Deaths	6	China	2	Female	18	65-69 years	441	Colon and rectum cancer	1	Number	2021	14059.130269249634	18162.22474650088	10764.147839216257
1	Deaths	6	China	1	Male	18	65-69 years	441	Colon and rectum cancer	3	Rate	2021	65.33814693714365	86.70927542411599	48.36291029877526
1	Deaths	6	China	2	Female	18	65-69 years	441	Colon and rectum cancer	3	Rate	2021	36.08288936617256	46.61351972852366	27.626286133295427
1	Deaths	6	China	1	Male	19	70-74 years	441	Colon and rectum cancer	1	Number	2021	26807.47139974992	35663.917371247284	20324.119587463305
1	Deaths	6	China	2	Female	19	70-74 years	441	Colon and rectum cancer	1	Number	2021	16295.821972043688	20623.874564065954	12348.503427834878
1	Deaths	6	China	1	Male	19	70-74 years	441	Colon and rectum cancer	3	Rate	2021	103.67791257636328	137.93022296691933	78.6035453459527
1	Deaths	6	China	2	Female	19	70-74 years	441	Colon and rectum cancer	3	Rate	2021	59.3872146053876	75.16002978137453	45.00191671106146
1	Deaths	6	China	1	Male	20	75-79 years	441	Colon and rectum cancer	1	Number	2021	23843.75294692174	31031.925760001435	18302.113844329684
1	Deaths	6	China	2	Female	20	75-79 years	441	Colon and rectum cancer	1	Number	2021	14879.016629463265	19035.737315516737	11331.87676055203
1	Deaths	6	China	1	Male	20	75-79 years	441	Colon and rectum cancer	3	Rate	2021	152.82075544937808	198.89160688123417	117.30296276082112
1	Deaths	6	China	2	Female	20	75-79 years	441	Colon and rectum cancer	3	Rate	2021	84.94283455299191	108.67314189193722	64.6925638177198
1	Deaths	6	China	1	Male	30	80-84 years	441	Colon and rectum cancer	1	Number	2021	18623.613578681736	23359.43763976981	14566.204378169197
1	Deaths	6	China	2	Female	30	80-84 years	441	Colon and rectum cancer	1	Number	2021	13000.9890029165	16442.740810406915	9783.73505672138
1	Deaths	6	China	1	Male	30	80-84 years	441	Colon and rectum cancer	3	Rate	2021	214.682038815837	269.27382684945894	167.91061737304796
1	Deaths	6	China	2	Female	30	80-84 years	441	Colon and rectum cancer	3	Rate	2021	116.94817331125662	147.9078631307329	88.0079156122809
1	Deaths	6	China	1	Male	31	85-89 years	441	Colon and rectum cancer	1	Number	2021	13075.734877278506	15914.003897377415	10546.606648768104
1	Deaths	6	China	2	Female	31	85-89 years	441	Colon and rectum cancer	1	Number	2021	8863.303791317965	11501.53946051857	6315.7912713344695
1	Deaths	6	China	1	Male	31	85-89 years	441	Colon and rectum cancer	3	Rate	2021	375.64070274047054	457.17871030049884	302.98371527514
1	Deaths	6	China	2	Female	31	85-89 years	441	Colon and rectum cancer	3	Rate	2021	146.62604970745844	190.27050593732596	104.4824307838505
1	Deaths	6	China	1	Male	32	90-94 years	441	Colon and rectum cancer	1	Number	2021	3978.199921239756	5031.766602083857	3096.2081796058433
1	Deaths	6	China	2	Female	32	90-94 years	441	Colon and rectum cancer	1	Number	2021	3787.892522883742	4813.221515776508	2692.134164685239
1	Deaths	6	China	1	Male	32	90-94 years	441	Colon and rectum cancer	3	Rate	2021	491.8433934554995	622.1007515061524	382.7986446260432
1	Deaths	6	China	2	Female	32	90-94 years	441	Colon and rectum cancer	3	Rate	2021	178.40884980394668	226.70160499367796	126.79888801959656
1	Deaths	6	China	1	Male	235	95+ years	441	Colon and rectum cancer	1	Number	2021	497.49777092908084	601.3227504551058	386.51375485121224
1	Deaths	6	China	2	Female	235	95+ years	441	Colon and rectum cancer	1	Number	2021	1097.2422465739155	1443.5888803656524	752.2462190527258
1	Deaths	6	China	1	Male	235	95+ years	441	Colon and rectum cancer	3	Rate	2021	411.3466260631548	497.19234744065716	319.5815906634722
1	Deaths	6	China	2	Female	235	95+ years	441	Colon and rectum cancer	3	Rate	2021	211.75955904365412	278.6018727414723	145.17790226930575
1	Deaths	68	Republic of Korea	1	Male	8	15-19 years	441	Colon and rectum cancer	1	Number	2021	1.021577486052684	1.5575742514906639	0.6442657606057396
1	Deaths	68	Republic of Korea	2	Female	8	15-19 years	441	Colon and rectum cancer	1	Number	2021	0.8890690106327043	1.2522975798020692	0.5889410366793494
1	Deaths	68	Republic of Korea	1	Male	8	15-19 years	441	Colon and rectum cancer	3	Rate	2021	0.08562365917840732	0.130548302674538	0.05399922439518042
1	Deaths	68	Republic of Korea	2	Female	8	15-19 years	441	Colon and rectum cancer	3	Rate	2021	0.07968963310449005	0.11224678115937102	0.05278836015188056
1	Deaths	68	Republic of Korea	1	Male	9	20-24 years	441	Colon and rectum cancer	1	Number	2021	2.681246543582735	4.088064737553055	1.782349795015579
1	Deaths	68	Republic of Korea	2	Female	9	20-24 years	441	Colon and rectum cancer	1	Number	2021	2.8062591282742515	4.1723641561510805	1.8605300356558985
1	Deaths	68	Republic of Korea	1	Male	9	20-24 years	441	Colon and rectum cancer	3	Rate	2021	0.16763827021134464	0.255596078158354	0.111436987121933
1	Deaths	68	Republic of Korea	2	Female	9	20-24 years	441	Colon and rectum cancer	3	Rate	2021	0.1895244699055449	0.28178620319846326	0.12565338859775052
1	Deaths	68	Republic of Korea	1	Male	10	25-29 years	441	Colon and rectum cancer	1	Number	2021	8.498756807812228	12.822092883394864	5.610665118306461
1	Deaths	68	Republic of Korea	2	Female	10	25-29 years	441	Colon and rectum cancer	1	Number	2021	6.925455829528312	10.051746389521314	4.64582377274158
1	Deaths	68	Republic of Korea	1	Male	10	25-29 years	441	Colon and rectum cancer	3	Rate	2021	0.4488706269060328	0.6772120912468392	0.2963330785861537
1	Deaths	68	Republic of Korea	2	Female	10	25-29 years	441	Colon and rectum cancer	3	Rate	2021	0.41295337546856004	0.5993688651089771	0.27702271966066133
1	Deaths	68	Republic of Korea	1	Male	11	30-34 years	441	Colon and rectum cancer	1	Number	2021	16.886122934847325	23.76417083111047	11.277646907652192
1	Deaths	68	Republic of Korea	2	Female	11	30-34 years	441	Colon and rectum cancer	1	Number	2021	13.822199646865933	19.539482292500423	9.708653610315386
1	Deaths	68	Republic of Korea	1	Male	11	30-34 years	441	Colon and rectum cancer	3	Rate	2021	0.9333465483334783	1.3135168389335576	0.6233492942810959
1	Deaths	68	Republic of Korea	2	Female	11	30-34 years	441	Colon and rectum cancer	3	Rate	2021	0.87990416572325	1.243859320838644	0.618040903295559
1	Deaths	68	Republic of Korea	1	Male	12	35-39 years	441	Colon and rectum cancer	1	Number	2021	34.6235428320174	48.6028483518851	23.002590238139227
1	Deaths	68	Republic of Korea	2	Female	12	35-39 years	441	Colon and rectum cancer	1	Number	2021	32.4520066385624	44.48522954355413	23.528042207321864
1	Deaths	68	Republic of Korea	1	Male	12	35-39 years	441	Colon and rectum cancer	3	Rate	2021	1.7917517844739406	2.5151741601808966	1.190373044915446
1	Deaths	68	Republic of Korea	2	Female	12	35-39 years	441	Colon and rectum cancer	3	Rate	2021	1.87610195607439	2.5717616507543415	1.360193423457057
1	Deaths	68	Republic of Korea	1	Male	13	40-44 years	441	Colon and rectum cancer	1	Number	2021	70.85589335303168	101.76142292838729	46.72534494115401
1	Deaths	68	Republic of Korea	2	Female	13	40-44 years	441	Colon and rectum cancer	1	Number	2021	61.7705601528399	83.8341950805153	44.97114026079084
1	Deaths	68	Republic of Korea	1	Male	13	40-44 years	441	Colon and rectum cancer	3	Rate	2021	3.363885055592653	4.83112573458224	2.2182867525476597
1	Deaths	68	Republic of Korea	2	Female	13	40-44 years	441	Colon and rectum cancer	3	Rate	2021	3.152952654264914	4.279146040496464	2.2954604215947265
1	Deaths	68	Republic of Korea	1	Male	14	45-49 years	441	Colon and rectum cancer	1	Number	2021	143.24797527955297	196.6530691301123	96.8999816004143
1	Deaths	68	Republic of Korea	2	Female	14	45-49 years	441	Colon and rectum cancer	1	Number	2021	112.33791085204885	151.54499572899618	82.53219561278836
1	Deaths	68	Republic of Korea	1	Male	14	45-49 years	441	Colon and rectum cancer	3	Rate	2021	6.632586292075936	9.10531857823209	4.486607844970053
1	Deaths	68	Republic of Korea	2	Female	14	45-49 years	441	Colon and rectum cancer	3	Rate	2021	5.454412766629348	7.358058852560105	4.0072372540488
1	Deaths	68	Republic of Korea	1	Male	15	50-54 years	441	Colon and rectum cancer	1	Number	2021	289.6724745176184	388.99285955980974	207.04869541867902
1	Deaths	68	Republic of Korea	2	Female	15	50-54 years	441	Colon and rectum cancer	1	Number	2021	179.05472814962044	242.61114494844975	130.61028420773093
1	Deaths	68	Republic of Korea	1	Male	15	50-54 years	441	Colon and rectum cancer	3	Rate	2021	12.81854607549971	17.213657948037227	9.162290088197594
1	Deaths	68	Republic of Korea	2	Female	15	50-54 years	441	Colon and rectum cancer	3	Rate	2021	8.04350329896009	10.898587068455909	5.867280148140709
1	Deaths	68	Republic of Korea	1	Male	16	55-59 years	441	Colon and rectum cancer	1	Number	2021	486.6217307993549	636.1596611181664	356.23463051255015
1	Deaths	68	Republic of Korea	2	Female	16	55-59 years	441	Colon and rectum cancer	1	Number	2021	228.13422859843493	301.6595617695817	164.48174283975044
1	Deaths	68	Republic of Korea	1	Male	16	55-59 years	441	Colon and rectum cancer	3	Rate	2021	23.152372143151386	30.267051971712686	16.94884591848467
1	Deaths	68	Republic of Korea	2	Female	16	55-59 years	441	Colon and rectum cancer	3	Rate	2021	11.05510310041691	14.618049983456936	7.9705822155710395
1	Deaths	68	Republic of Korea	1	Male	17	60-64 years	441	Colon and rectum cancer	1	Number	2021	720.0478352312846	933.7375322505355	541.379809413639
1	Deaths	68	Republic of Korea	2	Female	17	60-64 years	441	Colon and rectum cancer	1	Number	2021	312.1543478870764	426.03150281861764	223.568855476748
1	Deaths	68	Republic of Korea	1	Male	17	60-64 years	441	Colon and rectum cancer	3	Rate	2021	36.01679644453672	46.70555619528987	27.079820868526014
1	Deaths	68	Republic of Korea	2	Female	17	60-64 years	441	Colon and rectum cancer	3	Rate	2021	15.131980559816093	20.6522845578069	10.837714091614432
1	Deaths	68	Republic of Korea	1	Male	18	65-69 years	441	Colon and rectum cancer	1	Number	2021	798.6446226074623	1054.530633562877	589.3613972751256
1	Deaths	68	Republic of Korea	2	Female	18	65-69 years	441	Colon and rectum cancer	1	Number	2021	327.9535679221797	429.73346072624975	235.47124964884333
1	Deaths	68	Republic of Korea	1	Male	18	65-69 years	441	Colon and rectum cancer	3	Rate	2021	55.85493460753568	73.75087480961815	41.2182607547434
1	Deaths	68	Republic of Korea	2	Female	18	65-69 years	441	Colon and rectum cancer	3	Rate	2021	21.488189309958003	28.15701629780784	15.428558443698272
1	Deaths	68	Republic of Korea	1	Male	19	70-74 years	441	Colon and rectum cancer	1	Number	2021	845.3590773146176	1112.7922639814049	621.4698043889306
1	Deaths	68	Republic of Korea	2	Female	19	70-74 years	441	Colon and rectum cancer	1	Number	2021	414.3377866815758	565.0798038246079	297.51028872114983
1	Deaths	68	Republic of Korea	1	Male	19	70-74 years	441	Colon and rectum cancer	3	Rate	2021	85.75772113670604	112.88756602785567	63.04520245878191
1	Deaths	68	Republic of Korea	2	Female	19	70-74 years	441	Colon and rectum cancer	3	Rate	2021	37.24932203783243	50.80115853858698	26.746429870417085
1	Deaths	68	Republic of Korea	1	Male	20	75-79 years	441	Colon and rectum cancer	1	Number	2021	1037.2569161947586	1352.3849038644203	759.2469024258747
1	Deaths	68	Republic of Korea	2	Female	20	75-79 years	441	Colon and rectum cancer	1	Number	2021	705.216427839057	925.5878497315315	503.51962935415844
1	Deaths	68	Republic of Korea	1	Male	20	75-79 years	441	Colon and rectum cancer	3	Rate	2021	154.41216360691186	201.32396880140078	113.02595826067504
1	Deaths	68	Republic of Korea	2	Female	20	75-79 years	441	Colon and rectum cancer	3	Rate	2021	80.76542593883208	106.00362381863759	57.66595293017246
1	Deaths	68	Republic of Korea	1	Male	30	80-84 years	441	Colon and rectum cancer	1	Number	2021	1061.3652207977418	1413.94295049059	731.0518307704461
1	Deaths	68	Republic of Korea	2	Female	30	80-84 years	441	Colon and rectum cancer	1	Number	2021	1020.3793266104477	1400.9379898613463	693.7021108982364
1	Deaths	68	Republic of Korea	1	Male	30	80-84 years	441	Colon and rectum cancer	3	Rate	2021	263.2508409428573	350.7008364963227	181.32307847668702
1	Deaths	68	Republic of Korea	2	Female	30	80-84 years	441	Colon and rectum cancer	3	Rate	2021	150.87047560588235	207.1388309353914	102.56888264061958
1	Deaths	68	Republic of Korea	1	Male	31	85-89 years	441	Colon and rectum cancer	1	Number	2021	698.8840671067649	967.1979323269977	473.58128909583763
1	Deaths	68	Republic of Korea	2	Female	31	85-89 years	441	Colon and rectum cancer	1	Number	2021	946.7633240119378	1396.5710151693866	591.7925940424979
1	Deaths	68	Republic of Korea	1	Male	31	85-89 years	441	Colon and rectum cancer	3	Rate	2021	401.407236331865	555.5145227569833	272.0035630822323
1	Deaths	68	Republic of Korea	2	Female	31	85-89 years	441	Colon and rectum cancer	3	Rate	2021	239.27664239847434	352.95708537242206	149.56445957235536
1	Deaths	68	Republic of Korea	1	Male	32	90-94 years	441	Colon and rectum cancer	1	Number	2021	238.24400017100731	336.7713712506747	159.15004797112186
1	Deaths	68	Republic of Korea	2	Female	32	90-94 years	441	Colon and rectum cancer	1	Number	2021	570.1542375229998	837.985988314691	349.89145134848854
1	Deaths	68	Republic of Korea	1	Male	32	90-94 years	441	Colon and rectum cancer	3	Rate	2021	523.3793904301086	739.8263749474232	349.6241459774848
1	Deaths	68	Republic of Korea	2	Female	32	90-94 years	441	Colon and rectum cancer	3	Rate	2021	381.44382712951	560.6282676286637	234.08391185881962
1	Deaths	68	Republic of Korea	1	Male	235	95+ years	441	Colon and rectum cancer	1	Number	2021	65.02752900394225	94.02875721821518	39.97366020357502
1	Deaths	68	Republic of Korea	2	Female	235	95+ years	441	Colon and rectum cancer	1	Number	2021	206.18990294388942	298.49016893201525	126.11290873870946
1	Deaths	68	Republic of Korea	1	Male	235	95+ years	441	Colon and rectum cancer	3	Rate	2021	636.5318820285909	920.4148260545378	391.2882674568554
1	Deaths	68	Republic of Korea	2	Female	235	95+ years	441	Colon and rectum cancer	3	Rate	2021	483.01010575669665	699.2280708450652	295.4257629373115
1	Deaths	67	Japan	1	Male	8	15-19 years	441	Colon and rectum cancer	1	Number	2021	2.9279470158650454	3.0624064657993646	2.7941946585148596
1	Deaths	67	Japan	2	Female	8	15-19 years	441	Colon and rectum cancer	1	Number	2021	2.7511734498279683	2.8460892977489025	2.630926834545535
1	Deaths	67	Japan	1	Male	8	15-19 years	441	Colon and rectum cancer	3	Rate	2021	0.0983603883639051	0.10287737027753761	0.09386716026166594
1	Deaths	67	Japan	2	Female	8	15-19 years	441	Colon and rectum cancer	3	Rate	2021	0.09783342172416491	0.1012086877142231	0.09355737805103138
1	Deaths	67	Japan	1	Male	9	20-24 years	441	Colon and rectum cancer	1	Number	2021	7.94816336171348	8.346560684807628	7.54920327650196
1	Deaths	67	Japan	2	Female	9	20-24 years	441	Colon and rectum cancer	1	Number	2021	6.470105382240964	6.733210074482363	6.212535744081898
1	Deaths	67	Japan	1	Male	9	20-24 years	441	Colon and rectum cancer	3	Rate	2021	0.25176340243061945	0.2643829047001109	0.2391260742938196
1	Deaths	67	Japan	2	Female	9	20-24 years	441	Colon and rectum cancer	3	Rate	2021	0.21366350987816912	0.22235206573446367	0.20515773915638608
1	Deaths	67	Japan	1	Male	10	25-29 years	441	Colon and rectum cancer	1	Number	2021	14.649456695642634	15.460916161340535	13.884765582038264
1	Deaths	67	Japan	2	Female	10	25-29 years	441	Colon and rectum cancer	1	Number	2021	14.047786948881793	14.589511782003374	13.473086934823444
1	Deaths	67	Japan	1	Male	10	25-29 years	441	Colon and rectum cancer	3	Rate	2021	0.454089823844751	0.47924266694954126	0.43038666131207254
1	Deaths	67	Japan	2	Female	10	25-29 years	441	Colon and rectum cancer	3	Rate	2021	0.4560695906539935	0.47365700309040804	0.43741161974980797
1	Deaths	67	Japan	1	Male	11	30-34 years	441	Colon and rectum cancer	1	Number	2021	34.94086000918952	36.34673186510888	33.60014427617495
1	Deaths	67	Japan	2	Female	11	30-34 years	441	Colon and rectum cancer	1	Number	2021	32.39771656038725	33.71531944263694	31.051386057489932
1	Deaths	67	Japan	1	Male	11	30-34 years	441	Colon and rectum cancer	3	Rate	2021	1.033303469535842	1.0748792139812333	0.9936545822954908
1	Deaths	67	Japan	2	Female	11	30-34 years	441	Colon and rectum cancer	3	Rate	2021	0.9993228449357154	1.039964927174166	0.9577946456914477
1	Deaths	67	Japan	1	Male	12	35-39 years	441	Colon and rectum cancer	1	Number	2021	81.97637937037292	85.4739462863496	78.48613613008771
1	Deaths	67	Japan	2	Female	12	35-39 years	441	Colon and rectum cancer	1	Number	2021	71.4066446886752	73.83441467473068	68.91442352747181
1	Deaths	67	Japan	1	Male	12	35-39 years	441	Colon and rectum cancer	3	Rate	2021	2.149385020002445	2.241089703636881	2.0578723599599726
1	Deaths	67	Japan	2	Female	12	35-39 years	441	Colon and rectum cancer	3	Rate	2021	1.9338668333099382	1.9996167908301015	1.8663713801075417
1	Deaths	67	Japan	1	Male	13	40-44 years	441	Colon and rectum cancer	1	Number	2021	178.96738209018608	185.66821560438723	171.97081553350986
1	Deaths	67	Japan	2	Female	13	40-44 years	441	Colon and rectum cancer	1	Number	2021	152.24080376403066	157.34591617196142	147.17979083711666
1	Deaths	67	Japan	1	Male	13	40-44 years	441	Colon and rectum cancer	3	Rate	2021	4.222459490927564	4.380555327938279	4.057386288670764
1	Deaths	67	Japan	2	Female	13	40-44 years	441	Colon and rectum cancer	3	Rate	2021	3.698950337158442	3.8229877620515507	3.575984384473459
1	Deaths	67	Japan	1	Male	14	45-49 years	441	Colon and rectum cancer	1	Number	2021	440.9837678282353	459.68780708834834	422.21517282154986
1	Deaths	67	Japan	2	Female	14	45-49 years	441	Colon and rectum cancer	1	Number	2021	329.26877084251646	341.3911252349415	318.18240726904565
1	Deaths	67	Japan	1	Male	14	45-49 years	441	Colon and rectum cancer	3	Rate	2021	8.785719865001273	9.158360450147127	8.411793135678598
1	Deaths	67	Japan	2	Female	14	45-49 years	441	Colon and rectum cancer	3	Rate	2021	6.725670907284391	6.973283111916826	6.499219936052354
1	Deaths	67	Japan	1	Male	15	50-54 years	441	Colon and rectum cancer	1	Number	2021	810.0761603812432	840.395975771453	777.5649978627769
1	Deaths	67	Japan	2	Female	15	50-54 years	441	Colon and rectum cancer	1	Number	2021	565.1539121873158	585.8658304732566	543.2203116112992
1	Deaths	67	Japan	1	Male	15	50-54 years	441	Colon and rectum cancer	3	Rate	2021	17.174524254876435	17.81733838802838	16.4852511018869
1	Deaths	67	Japan	2	Female	15	50-54 years	441	Colon and rectum cancer	3	Rate	2021	12.138062582103705	12.582901686865744	11.666984862032445
1	Deaths	67	Japan	1	Male	16	55-59 years	441	Colon and rectum cancer	1	Number	2021	1266.6706657225077	1318.3406039115132	1212.8591365937764
1	Deaths	67	Japan	2	Female	16	55-59 years	441	Colon and rectum cancer	1	Number	2021	760.8742824715689	797.756279802372	716.4604928313032
1	Deaths	67	Japan	1	Male	16	55-59 years	441	Colon and rectum cancer	3	Rate	2021	32.131284130858894	33.441981149351705	30.766261967844592
1	Deaths	67	Japan	2	Female	16	55-59 years	441	Colon and rectum cancer	3	Rate	2021	19.2532917872617	20.18656009802696	18.12943772750244
1	Deaths	67	Japan	1	Male	17	60-64 years	441	Colon and rectum cancer	1	Number	2021	1991.4880090640804	2070.786201549243	1900.8219103141782
1	Deaths	67	Japan	2	Female	17	60-64 years	441	Colon and rectum cancer	1	Number	2021	1047.9084196810345	1102.9854972769253	957.395588808363
1	Deaths	67	Japan	1	Male	17	60-64 years	441	Colon and rectum cancer	3	Rate	2021	53.98651862500344	56.13618426498949	51.528684580038046
1	Deaths	67	Japan	2	Female	17	60-64 years	441	Colon and rectum cancer	3	Rate	2021	27.803257790334605	29.264570781027928	25.401758267263833
1	Deaths	67	Japan	1	Male	18	65-69 years	441	Colon and rectum cancer	1	Number	2021	3454.4627626030087	3600.5485263556543	3266.574035579945
1	Deaths	67	Japan	2	Female	18	65-69 years	441	Colon and rectum cancer	1	Number	2021	1710.9216674628624	1820.052900173651	1514.5124232681824
1	Deaths	67	Japan	1	Male	18	65-69 years	441	Colon and rectum cancer	3	Rate	2021	89.33668690438672	93.11464574616153	84.47765164117968
1	Deaths	67	Japan	2	Female	18	65-69 years	441	Colon and rectum cancer	3	Rate	2021	41.93423208289087	44.60900938393031	37.120294083322186
1	Deaths	67	Japan	1	Male	19	70-74 years	441	Colon and rectum cancer	1	Number	2021	5863.054627228285	6131.362183755813	5504.9649544833665
1	Deaths	67	Japan	2	Female	19	70-74 years	441	Colon and rectum cancer	1	Number	2021	3023.6098047690643	3283.213487326293	2580.36100186465
1	Deaths	67	Japan	1	Male	19	70-74 years	441	Colon and rectum cancer	3	Rate	2021	126.98666260112955	132.7978793337632	119.23087396449779
1	Deaths	67	Japan	2	Female	19	70-74 years	441	Colon and rectum cancer	3	Rate	2021	58.820423547126815	63.870677894868706	50.19759057361556
1	Deaths	67	Japan	1	Male	20	75-79 years	441	Colon and rectum cancer	1	Number	2021	5404.872842989027	5694.687920405491	4970.532075342336
1	Deaths	67	Japan	2	Female	20	75-79 years	441	Colon and rectum cancer	1	Number	2021	3409.588821128571	3766.243901571495	2769.707783692697
1	Deaths	67	Japan	1	Male	20	75-79 years	441	Colon and rectum cancer	3	Rate	2021	177.1242340420231	186.62182539938655	162.89036064342173
1	Deaths	67	Japan	2	Female	20	75-79 years	441	Colon and rectum cancer	3	Rate	2021	91.12306347899208	100.6548590239307	74.02190452634969
1	Deaths	67	Japan	1	Male	30	80-84 years	441	Colon and rectum cancer	1	Number	2021	5610.363777064123	5994.348142862919	4880.4245047117865
1	Deaths	67	Japan	2	Female	30	80-84 years	441	Colon and rectum cancer	1	Number	2021	4557.301726748965	5291.845467367068	3237.8199580686032
1	Deaths	67	Japan	1	Male	30	80-84 years	441	Colon and rectum cancer	3	Rate	2021	238.54745598476586	254.87411451156115	207.511116210353
1	Deaths	67	Japan	2	Female	30	80-84 years	441	Colon and rectum cancer	3	Rate	2021	140.05680969307556	162.63110015252693	99.50597104992522
1	Deaths	67	Japan	1	Male	31	85-89 years	441	Colon and rectum cancer	1	Number	2021	5310.429363030788	5765.258465824983	4488.5663645908335
1	Deaths	67	Japan	2	Female	31	85-89 years	441	Colon and rectum cancer	1	Number	2021	6387.442529260108	7652.190226312622	4266.827879338875
1	Deaths	67	Japan	1	Male	31	85-89 years	441	Colon and rectum cancer	3	Rate	2021	375.4077340670873	407.560758087406	317.30815211881367
1	Deaths	67	Japan	2	Female	31	85-89 years	441	Colon and rectum cancer	3	Rate	2021	258.6152885959299	309.82249542024863	172.755671514778
1	Deaths	67	Japan	1	Male	32	90-94 years	441	Colon and rectum cancer	1	Number	2021	3217.249160267158	3506.0128914827196	2641.421365887109
1	Deaths	67	Japan	2	Female	32	90-94 years	441	Colon and rectum cancer	1	Number	2021	6656.762349807679	8042.906149891626	4331.921979207118
1	Deaths	67	Japan	1	Male	32	90-94 years	441	Colon and rectum cancer	3	Rate	2021	542.4752476017889	591.1650346795694	445.3822623303679
1	Deaths	67	Japan	2	Female	32	90-94 years	441	Colon and rectum cancer	3	Rate	2021	480.2021731817564	580.1951172233835	312.49400822145503
1	Deaths	67	Japan	1	Male	235	95+ years	441	Colon and rectum cancer	1	Number	2021	1118.2842383153784	1279.0631805424425	798.8607876929894
1	Deaths	67	Japan	2	Female	235	95+ years	441	Colon and rectum cancer	1	Number	2021	4386.114564879922	5373.711486250149	2707.441863796035
1	Deaths	67	Japan	1	Male	235	95+ years	441	Colon and rectum cancer	3	Rate	2021	494.94518660561204	566.1048800326649	353.57048600832076
1	Deaths	67	Japan	2	Female	235	95+ years	441	Colon and rectum cancer	3	Rate	2021	668.6159991170205	819.1645296077934	412.7203975263223
1	Deaths	71	Australia	1	Male	8	15-19 years	441	Colon and rectum cancer	1	Number	2021	0.5179328822032598	0.6666875162372018	0.3857750348868274
1	Deaths	71	Australia	2	Female	8	15-19 years	441	Colon and rectum cancer	1	Number	2021	0.40555333667322213	0.4806181450225873	0.33953055679658245
1	Deaths	71	Australia	1	Male	8	15-19 years	441	Colon and rectum cancer	3	Rate	2021	0.06765265156257315	0.08708305610033118	0.05039012758895605
1	Deaths	71	Australia	2	Female	8	15-19 years	441	Colon and rectum cancer	3	Rate	2021	0.056069826798576326	0.06644792117536744	0.04694183918833868
1	Deaths	71	Australia	1	Male	9	20-24 years	441	Colon and rectum cancer	1	Number	2021	1.4149652536325927	1.7467398716446267	1.108963441368543
1	Deaths	71	Australia	2	Female	9	20-24 years	441	Colon and rectum cancer	1	Number	2021	1.3421923605208834	1.7281874774944597	1.0175666251141904
1	Deaths	71	Australia	1	Male	9	20-24 years	441	Colon and rectum cancer	3	Rate	2021	0.1716862404684979	0.21194244937760257	0.13455720101732604
1	Deaths	71	Australia	2	Female	9	20-24 years	441	Colon and rectum cancer	3	Rate	2021	0.17020122769243543	0.21914863994464961	0.1290359667865125
1	Deaths	71	Australia	1	Male	10	25-29 years	441	Colon and rectum cancer	1	Number	2021	4.967823460548224	6.341536597473391	3.756594240175182
1	Deaths	71	Australia	2	Female	10	25-29 years	441	Colon and rectum cancer	1	Number	2021	4.722340755751606	5.770293477969503	3.7826428894489026
1	Deaths	71	Australia	1	Male	10	25-29 years	441	Colon and rectum cancer	3	Rate	2021	0.5490400036594012	0.7008617162693589	0.4151758877407967
1	Deaths	71	Australia	2	Female	10	25-29 years	441	Colon and rectum cancer	3	Rate	2021	0.523917814602734	0.6401824232849178	0.41966348863090885
1	Deaths	71	Australia	1	Male	11	30-34 years	441	Colon and rectum cancer	1	Number	2021	12.81533672345124	15.458852533321352	10.336035392141081
1	Deaths	71	Australia	2	Female	11	30-34 years	441	Colon and rectum cancer	1	Number	2021	10.104559150870104	12.435036913663085	8.07935507256838
1	Deaths	71	Australia	1	Male	11	30-34 years	441	Colon and rectum cancer	3	Rate	2021	1.3890807583085663	1.67561688490565	1.12034417746871
1	Deaths	71	Australia	2	Female	11	30-34 years	441	Colon and rectum cancer	3	Rate	2021	1.0469853261305329	1.28845810926602	0.8371435190073555
1	Deaths	71	Australia	1	Male	12	35-39 years	441	Colon and rectum cancer	1	Number	2021	22.55180385560882	28.6720840275965	17.20556749328798
1	Deaths	71	Australia	2	Female	12	35-39 years	441	Colon and rectum cancer	1	Number	2021	19.442769717071624	23.756143465871958	15.730441444260103
1	Deaths	71	Australia	1	Male	12	35-39 years	441	Colon and rectum cancer	3	Rate	2021	2.449985389061954	3.1148810707706285	1.8691803653032806
1	Deaths	71	Australia	2	Female	12	35-39 years	441	Colon and rectum cancer	3	Rate	2021	2.0390060630270237	2.491359063854015	1.6496860244543818
1	Deaths	71	Australia	1	Male	13	40-44 years	441	Colon and rectum cancer	1	Number	2021	36.766090523938466	44.93817524471253	29.049798244084094
1	Deaths	71	Australia	2	Female	13	40-44 years	441	Colon and rectum cancer	1	Number	2021	33.73489611566519	40.02680320800856	27.625358026635574
1	Deaths	71	Australia	1	Male	13	40-44 years	441	Colon and rectum cancer	3	Rate	2021	4.428757358204845	5.413147589073612	3.49927081978125
1	Deaths	71	Australia	2	Female	13	40-44 years	441	Colon and rectum cancer	3	Rate	2021	3.978575226796387	4.720620662509981	3.258037751155698
1	Deaths	71	Australia	1	Male	14	45-49 years	441	Colon and rectum cancer	1	Number	2021	70.04513552544832	84.32342422752386	57.36621662664381
1	Deaths	71	Australia	2	Female	14	45-49 years	441	Colon and rectum cancer	1	Number	2021	57.76522849724479	69.04723621360415	47.48390631268595
1	Deaths	71	Australia	1	Male	14	45-49 years	441	Colon and rectum cancer	3	Rate	2021	8.59029432158527	10.341375270166372	7.035359147240857
1	Deaths	71	Australia	2	Female	14	45-49 years	441	Colon and rectum cancer	3	Rate	2021	6.839970508147482	8.175871050049972	5.62256096339862
1	Deaths	71	Australia	1	Male	15	50-54 years	441	Colon and rectum cancer	1	Number	2021	121.10238273491734	146.28449190360308	98.73505026103783
1	Deaths	71	Australia	2	Female	15	50-54 years	441	Colon and rectum cancer	1	Number	2021	95.94761179120094	117.0328500918738	77.15340183518194
1	Deaths	71	Australia	1	Male	15	50-54 years	441	Colon and rectum cancer	3	Rate	2021	15.21515314094081	18.379002098827325	12.404949235297167
1	Deaths	71	Australia	2	Female	15	50-54 years	441	Colon and rectum cancer	3	Rate	2021	11.542688847125048	14.079285021105802	9.281707947236079
1	Deaths	71	Australia	1	Male	16	55-59 years	441	Colon and rectum cancer	1	Number	2021	192.82172321463216	226.62778726640943	162.23266728298302
1	Deaths	71	Australia	2	Female	16	55-59 years	441	Colon and rectum cancer	1	Number	2021	137.6318971925437	168.41324183634327	110.2540143703835
1	Deaths	71	Australia	1	Male	16	55-59 years	441	Colon and rectum cancer	3	Rate	2021	25.41867956333778	29.875156225323106	21.386284261040217
1	Deaths	71	Australia	2	Female	16	55-59 years	441	Colon and rectum cancer	3	Rate	2021	17.4026886868855	21.29479632418976	13.940927413671748
1	Deaths	71	Australia	1	Male	17	60-64 years	441	Colon and rectum cancer	1	Number	2021	293.63980008276144	344.30833249505025	245.8128867128987
1	Deaths	71	Australia	2	Female	17	60-64 years	441	Colon and rectum cancer	1	Number	2021	194.5626019505846	232.86342720671544	158.93927261001755
1	Deaths	71	Australia	1	Male	17	60-64 years	441	Colon and rectum cancer	3	Rate	2021	41.143375709583694	48.2428031887757	34.442102022394906
1	Deaths	71	Australia	2	Female	17	60-64 years	441	Colon and rectum cancer	3	Rate	2021	25.660840821084033	30.71233257931696	20.962483713598843
1	Deaths	71	Australia	1	Male	18	65-69 years	441	Colon and rectum cancer	1	Number	2021	416.610345670451	500.4555221150626	342.30980467081474
1	Deaths	71	Australia	2	Female	18	65-69 years	441	Colon and rectum cancer	1	Number	2021	231.264557819637	281.96644840529325	187.58145996443528
1	Deaths	71	Australia	1	Male	18	65-69 years	441	Colon and rectum cancer	3	Rate	2021	66.27363119141721	79.61157240823243	54.454033568107675
1	Deaths	71	Australia	2	Female	18	65-69 years	441	Colon and rectum cancer	3	Rate	2021	34.316276174626445	41.8396947923206	27.83434368875266
1	Deaths	71	Australia	1	Male	19	70-74 years	441	Colon and rectum cancer	1	Number	2021	521.4764232286341	626.21683903367	432.33320993304767
1	Deaths	71	Australia	2	Female	19	70-74 years	441	Colon and rectum cancer	1	Number	2021	321.2254320954037	384.688477923609	259.00206050764996
1	Deaths	71	Australia	1	Male	19	70-74 years	441	Colon and rectum cancer	3	Rate	2021	92.43002688164809	110.99493033119468	76.62967765355837
1	Deaths	71	Australia	2	Female	19	70-74 years	441	Colon and rectum cancer	3	Rate	2021	53.44892373911763	64.00858420745952	43.09553353246403
1	Deaths	71	Australia	1	Male	20	75-79 years	441	Colon and rectum cancer	1	Number	2021	571.0821968937231	680.8197694491554	466.80556195632244
1	Deaths	71	Australia	2	Female	20	75-79 years	441	Colon and rectum cancer	1	Number	2021	406.602836277435	484.9768662470734	323.870491913119
1	Deaths	71	Australia	1	Male	20	75-79 years	441	Colon and rectum cancer	3	Rate	2021	144.82002475630992	172.64823943471725	118.37664246339384
1	Deaths	71	Australia	2	Female	20	75-79 years	441	Colon and rectum cancer	3	Rate	2021	94.61631489443856	112.85391984339586	75.3645
1	Deaths	71	Australia	1	Male	30	80-84 years	441	Colon and rectum cancer	1	Number	2021	545.9556635091274	639.849476253202	447.8641119207203
1	Deaths	71	Australia	2	Female	30	80-84 years	441	Colon and rectum cancer	1	Number	2021	459.22335773181135	557.7653786264848	349.8714769821828
1	Deaths	71	Australia	1	Male	30	80-84 years	441	Colon and rectum cancer	3	Rate	2021	215.77241220623387	252.88109304088331	177.00470244892142
1	Deaths	71	Australia	2	Female	30	80-84 years	441	Colon and rectum cancer	3	Rate	2021	152.3037582097708	184.98571976759177	116.03665174607575
1	Deaths	71	Australia	1	Male	31	85-89 years	441	Colon and rectum cancer	1	Number	2021	455.35345672522243	553.374676748533	362.2494164823132
1	Deaths	71	Australia	2	Female	31	85-89 years	441	Colon and rectum cancer	1	Number	2021	482.4840149798857	621.4980600481779	344.38078221505816
1	Deaths	71	Australia	1	Male	31	85-89 years	441	Colon and rectum cancer	3	Rate	2021	333.06498609913695	404.76189715209324	264.9647105630923
1	Deaths	71	Australia	2	Female	31	85-89 years	441	Colon and rectum cancer	3	Rate	2021	253.73751147226045	326.84475805490985	181.10925950937937
1	Deaths	71	Australia	1	Male	32	90-94 years	441	Colon and rectum cancer	1	Number	2021	267.40237181071615	328.93991526778353	211.96665603223812
1	Deaths	71	Australia	2	Female	32	90-94 years	441	Colon and rectum cancer	1	Number	2021	413.18147286680147	528.5418938131309	293.9000633035931
1	Deaths	71	Australia	1	Male	32	90-94 years	441	Colon and rectum cancer	3	Rate	2021	459.10222770642946	564.7558279247526	363.9248347908001
1	Deaths	71	Australia	2	Female	32	90-94 years	441	Colon and rectum cancer	3	Rate	2021	402.09034881726524	514.3541238025717	286.01083720240837
1	Deaths	71	Australia	1	Male	235	95+ years	441	Colon and rectum cancer	1	Number	2021	85.59783446153456	106.68653636349516	65.2489738503007
1	Deaths	71	Australia	2	Female	235	95+ years	441	Colon and rectum cancer	1	Number	2021	184.09109880902187	234.60547098070708	132.0566262311316
1	Deaths	71	Australia	1	Male	235	95+ years	441	Colon and rectum cancer	3	Rate	2021	556.8312912592922	694.0175785634154	424.4578217540491
1	Deaths	71	Australia	2	Female	235	95+ years	441	Colon and rectum cancer	3	Rate	2021	499.0766505209072	636.0226725160537	358.009589409298
2	DALYs (Disability-Adjusted Life Years)	68	Republic of Korea	1	Male	1	<5 years	441	Colon and rectum cancer	1	Number	2021	0	0	0
2	DALYs (Disability-Adjusted Life Years)	68	Republic of Korea	2	Female	1	<5 years	441	Colon and rectum cancer	1	Number	2021	0	0	0
2	DALYs (Disability-Adjusted Life Years)	68	Republic of Korea	1	Male	1	<5 years	441	Colon and rectum cancer	3	Rate	2021	0	0	0
2	DALYs (Disability-Adjusted Life Years)	68	Republic of Korea	2	Female	1	<5 years	441	Colon and rectum cancer	3	Rate	2021	0	0	0
2	DALYs (Disability-Adjusted Life Years)	68	Republic of Korea	1	Male	6	5-9 years	441	Colon and rectum cancer	1	Number	2021	0	0	0
2	DALYs (Disability-Adjusted Life Years)	68	Republic of Korea	2	Female	6	5-9 years	441	Colon and rectum cancer	1	Number	2021	0	0	0
2	DALYs (Disability-Adjusted Life Years)	68	Republic of Korea	1	Male	6	5-9 years	441	Colon and rectum cancer	3	Rate	2021	0	0	0
2	DALYs (Disability-Adjusted Life Years)	68	Republic of Korea	2	Female	6	5-9 years	441	Colon and rectum cancer	3	Rate	2021	0	0	0
2	DALYs (Disability-Adjusted Life Years)	68	Republic of Korea	1	Male	7	10-14 years	441	Colon and rectum cancer	1	Number	2021	0	0	0
2	DALYs (Disability-Adjusted Life Years)	68	Republic of Korea	2	Female	7	10-14 years	441	Colon and rectum cancer	1	Number	2021	0	0	0
2	DALYs (Disability-Adjusted Life Years)	68	Republic of Korea	1	Male	7	10-14 years	441	Colon and rectum cancer	3	Rate	2021	0	0	0
2	DALYs (Disability-Adjusted Life Years)	68	Republic of Korea	2	Female	7	10-14 years	441	Colon and rectum cancer	3	Rate	2021	0	0	0
2	DALYs (Disability-Adjusted Life Years)	68	Republic of Korea	1	Male	8	15-19 years	441	Colon and rectum cancer	1	Number	2021	77.8594466847319	119.2784215667864	49.15271266979626
2	DALYs (Disability-Adjusted Life Years)	68	Republic of Korea	2	Female	8	15-19 years	441	Colon and rectum cancer	1	Number	2021	67.02558405340231	94.88973224955302	44.72951703170613
2	DALYs (Disability-Adjusted Life Years)	68	Republic of Korea	1	Male	8	15-19 years	441	Colon and rectum cancer	3	Rate	2021	6.525800360491748	9.997337504994903	4.119741453577582
2	DALYs (Disability-Adjusted Life Years)	68	Republic of Korea	2	Female	8	15-19 years	441	Colon and rectum cancer	3	Rate	2021	6.007682348559988	8.505220469858557	4.00922623392423
2	DALYs (Disability-Adjusted Life Years)	68	Republic of Korea	1	Male	9	20-24 years	441	Colon and rectum cancer	1	Number	2021	190.21850794117034	288.61860664061146	126.09322220920521
2	DALYs (Disability-Adjusted Life Years)	68	Republic of Korea	2	Female	9	20-24 years	441	Colon and rectum cancer	1	Number	2021	197.88853277920117	295.4137521892553	130.8250432048699
2	DALYs (Disability-Adjusted Life Years)	68	Republic of Korea	1	Male	9	20-24 years	441	Colon and rectum cancer	3	Rate	2021	11.892939017398783	18.045160406394267	7.883665046437991
2	DALYs (Disability-Adjusted Life Years)	68	Republic of Korea	2	Female	9	20-24 years	441	Colon and rectum cancer	3	Rate	2021	13.364667181832305	19.95116353382069	8.83544456531381
2	DALYs (Disability-Adjusted Life Years)	68	Republic of Korea	1	Male	10	25-29 years	441	Colon and rectum cancer	1	Number	2021	562.816448006686	852.1322522330556	374.34228890082477
2	DALYs (Disability-Adjusted Life Years)	68	Republic of Korea	2	Female	10	25-29 years	441	Colon and rectum cancer	1	Number	2021	456.2398418491058	665.8568698433262	306.01864372525205
2	DALYs (Disability-Adjusted Life Years)	68	Republic of Korea	1	Male	10	25-29 years	441	Colon and rectum cancer	3	Rate	2021	29.72573254685478	45.00624584469837	19.771274987171612
2	DALYs (Disability-Adjusted Life Years)	68	Republic of Korea	2	Female	10	25-29 years	441	Colon and rectum cancer	3	Rate	2021	27.204820498820826	39.703934116270126	18.2473811101125
2	DALYs (Disability-Adjusted Life Years)	68	Republic of Korea	1	Male	11	30-34 years	441	Colon and rectum cancer	1	Number	2021	1032.4925686378517	1465.7183534351086	697.8417979423725
2	DALYs (Disability-Adjusted Life Years)	68	Republic of Korea	2	Female	11	30-34 years	441	Colon and rectum cancer	1	Number	2021	838.4455802491692	1193.13543987606	584.0788299187595
2	DALYs (Disability-Adjusted Life Years)	68	Republic of Korea	1	Male	11	30-34 years	441	Colon and rectum cancer	3	Rate	2021	57.06895412501146	81.01463973026902	38.571804546573475
2	DALYs (Disability-Adjusted Life Years)	68	Republic of Korea	2	Female	11	30-34 years	441	Colon and rectum cancer	3	Rate	2021	53.37441055995532	75.95352915171001	37.1817372550257
2	DALYs (Disability-Adjusted Life Years)	68	Republic of Korea	1	Male	12	35-39 years	441	Colon and rectum cancer	1	Number	2021	1932.3298362600867	2714.5783039283874	1294.4316067682034
2	DALYs (Disability-Adjusted Life Years)	68	Republic of Korea	2	Female	12	35-39 years	441	Colon and rectum cancer	1	Number	2021	1800.704184312377	2502.867494216938	1309.7366049211387
2	DALYs (Disability-Adjusted Life Years)	68	Republic of Korea	1	Male	12	35-39 years	441	Colon and rectum cancer	3	Rate	2021	99.99714498048453	140.47812910873463	66.98621664914313
2	DALYs (Disability-Adjusted Life Years)	68	Republic of Korea	2	Female	12	35-39 years	441	Colon and rectum cancer	3	Rate	2021	104.10156389174975	144.69473810952647	75.71794970345259
2	DALYs (Disability-Adjusted Life Years)	68	Republic of Korea	1	Male	13	40-44 years	441	Colon and rectum cancer	1	Number	2021	3610.3872670886494	5187.979670203471	2373.9264349924842
2	DALYs (Disability-Adjusted Life Years)	68	Republic of Korea	2	Female	13	40-44 years	441	Colon and rectum cancer	1	Number	2021	3132.008579061343	4280.085547449629	2272.5876363259786
2	DALYs (Disability-Adjusted Life Years)	68	Republic of Korea	1	Male	13	40-44 years	441	Colon and rectum cancer	3	Rate	2021	171.40321288662278	246.2994460371062	112.70220838173785
2	DALYs (Disability-Adjusted Life Years)	68	Republic of Korea	2	Female	13	40-44 years	441	Colon and rectum cancer	3	Rate	2021	159.86701007887726	218.4682647190109	115.99961538756092
2	DALYs (Disability-Adjusted Life Years)	68	Republic of Korea	1	Male	14	45-49 years	441	Colon and rectum cancer	1	Number	2021	6544.008574999463	8996.676200168717	4447.345849098445
2	DALYs (Disability-Adjusted Life Years)	68	Republic of Korea	2	Female	14	45-49 years	441	Colon and rectum cancer	1	Number	2021	5110.542841132188	6888.017511828621	3746.176663314848
2	DALYs (Disability-Adjusted Life Years)	68	Republic of Korea	1	Male	14	45-49 years	441	Colon and rectum cancer	3	Rate	2021	302.9969637271678	416.5589853750783	205.9184784796158
2	DALYs (Disability-Adjusted Life Years)	68	Republic of Korea	2	Female	14	45-49 years	441	Colon and rectum cancer	3	Rate	2021	248.13537928250693	334.4382174132207	181.890455888434
2	DALYs (Disability-Adjusted Life Years)	68	Republic of Korea	1	Male	15	50-54 years	441	Colon and rectum cancer	1	Number	2021	11815.863683233041	15854.06962789391	8546.390336358603
2	DALYs (Disability-Adjusted Life Years)	68	Republic of Korea	2	Female	15	50-54 years	441	Colon and rectum cancer	1	Number	2021	7298.273087047482	9867.360518629523	5352.670567903031
2	DALYs (Disability-Adjusted Life Years)	68	Republic of Korea	1	Male	15	50-54 years	441	Colon and rectum cancer	3	Rate	2021	522.8739572082968	701.5720853276249	378.1936771460664
2	DALYs (Disability-Adjusted Life Years)	68	Republic of Korea	2	Female	15	50-54 years	441	Colon and rectum cancer	3	Rate	2021	327.85330082612825	443.2619440091194	240.45287056144068
2	DALYs (Disability-Adjusted Life Years)	68	Republic of Korea	1	Male	16	55-59 years	441	Colon and rectum cancer	1	Number	2021	17466.215958553777	23062.552882413478	12768.055673083407
2	DALYs (Disability-Adjusted Life Years)	68	Republic of Korea	2	Female	16	55-59 years	441	Colon and rectum cancer	1	Number	2021	8161.389487961565	10708.595465505121	5863.842983876295
2	DALYs (Disability-Adjusted Life Years)	68	Republic of Korea	1	Male	16	55-59 years	441	Colon and rectum cancer	3	Rate	2021	831.0034390384084	1097.264616661573	607.4754943683128
2	DALYs (Disability-Adjusted Life Years)	68	Republic of Korea	2	Female	16	55-59 years	441	Colon and rectum cancer	3	Rate	2021	395.49085986079376	518.9253171657925	284.15459245054984
2	DALYs (Disability-Adjusted Life Years)	68	Republic of Korea	1	Male	17	60-64 years	441	Colon and rectum cancer	1	Number	2021	22448.80505400262	29138.626550802626	16809.75758734238
2	DALYs (Disability-Adjusted Life Years)	68	Republic of Korea	2	Female	17	60-64 years	441	Colon and rectum cancer	1	Number	2021	9716.645335296724	13293.842241922375	7009.021850714702
2	DALYs (Disability-Adjusted Life Years)	68	Republic of Korea	1	Male	17	60-64 years	441	Colon and rectum cancer	3	Rate	2021	1122.8893449744087	1457.5142508643619	840.8241615098358
2	DALYs (Disability-Adjusted Life Years)	68	Republic of Korea	2	Female	17	60-64 years	441	Colon and rectum cancer	3	Rate	2021	471.0236756770323	644.4317169748432	339.7690376771843
2	DALYs (Disability-Adjusted Life Years)	68	Republic of Korea	1	Male	18	65-69 years	441	Colon and rectum cancer	1	Number	2021	21145.537227142475	27745.637982196335	15659.957317812914
2	DALYs (Disability-Adjusted Life Years)	68	Republic of Korea	2	Female	18	65-69 years	441	Colon and rectum cancer	1	Number	2021	8663.694697968444	11434.411411477206	6251.530575292851
2	DALYs (Disability-Adjusted Life Years)	68	Republic of Korea	1	Male	18	65-69 years	441	Colon and rectum cancer	3	Rate	2021	1478.8587634975686	1940.4510482776209	1095.2128984322394
2	DALYs (Disability-Adjusted Life Years)	68	Republic of Korea	2	Female	18	65-69 years	441	Colon and rectum cancer	3	Rate	2021	567.6630169725756	749.2060495468352	409.6130843460117
2	DALYs (Disability-Adjusted Life Years)	68	Republic of Korea	1	Male	19	70-74 years	441	Colon and rectum cancer	1	Number	2021	18321.34616585138	24005.38789745514	13400.331389418177
2	DALYs (Disability-Adjusted Life Years)	68	Republic of Korea	2	Female	19	70-74 years	441	Colon and rectum cancer	1	Number	2021	8945.091760542384	12161.738396031138	6461.181433694432
2	DALYs (Disability-Adjusted Life Years)	68	Republic of Korea	1	Male	19	70-74 years	441	Colon and rectum cancer	3	Rate	2021	1858.6148034646203	2435.234229255514	1359.4008904283414
2	DALYs (Disability-Adjusted Life Years)	68	Republic of Korea	2	Female	19	70-74 years	441	Colon and rectum cancer	3	Rate	2021	804.171413654994	1093.3507022901201	580.8657469937906
2	DALYs (Disability-Adjusted Life Years)	68	Republic of Korea	1	Male	20	75-79 years	441	Colon and rectum cancer	1	Number	2021	17992.142311390773	23615.80114233159	13149.308881744371
2	DALYs (Disability-Adjusted Life Years)	68	Republic of Korea	2	Female	20	75-79 years	441	Colon and rectum cancer	1	Number	2021	12100.368929724698	15845.840281826462	8638.33733816848
2	DALYs (Disability-Adjusted Life Years)	68	Republic of Korea	1	Male	20	75-79 years	441	Colon and rectum cancer	3	Rate	2021	2678.416098122857	3515.587018764513	1957.4834379648478
2	DALYs (Disability-Adjusted Life Years)	68	Republic of Korea	2	Female	20	75-79 years	441	Colon and rectum cancer	3	Rate	2021	1385.803580357404	1814.7564197306085	989.3118863642188
2	DALYs (Disability-Adjusted Life Years)	68	Republic of Korea	1	Male	30	80-84 years	441	Colon and rectum cancer	1	Number	2021	14427.843201174715	18996.166181707296	10055.530614138743
2	DALYs (Disability-Adjusted Life Years)	68	Republic of Korea	2	Female	30	80-84 years	441	Colon and rectum cancer	1	Number	2021	13682.74591530197	18705.62526140774	9270.90658739677
2	DALYs (Disability-Adjusted Life Years)	68	Republic of Korea	1	Male	30	80-84 years	441	Colon and rectum cancer	3	Rate	2021	3578.5437295996703	4711.626708727129	2494.077286901335
2	DALYs (Disability-Adjusted Life Years)	68	Republic of Korea	2	Female	30	80-84 years	441	Colon and rectum cancer	3	Rate	2021	2023.093108612298	2765.7622083237297	1370.7707022882921
2	DALYs (Disability-Adjusted Life Years)	68	Republic of Korea	1	Male	31	85-89 years	441	Colon and rectum cancer	1	Number	2021	7544.062426859651	10458.552814958435	5165.72422743649
2	DALYs (Disability-Adjusted Life Years)	68	Republic of Korea	2	Female	31	85-89 years	441	Colon and rectum cancer	1	Number	2021	10058.953671017805	14833.957225178438	6298.47837621275
2	DALYs (Disability-Adjusted Life Years)	68	Republic of Korea	1	Male	31	85-89 years	441	Colon and rectum cancer	3	Rate	2021	4332.966499031922	6006.917282951854	2966.957158391008
2	DALYs (Disability-Adjusted Life Years)	68	Republic of Korea	2	Female	31	85-89 years	441	Colon and rectum cancer	3	Rate	2021	2542.211553193412	3749.0039889615864	1591.8220740673503
2	DALYs (Disability-Adjusted Life Years)	68	Republic of Korea	1	Male	32	90-94 years	441	Colon and rectum cancer	1	Number	2021	2170.4388747990715	3064.222252180363	1451.3722190431533
2	DALYs (Disability-Adjusted Life Years)	68	Republic of Korea	2	Female	32	90-94 years	441	Colon and rectum cancer	1	Number	2021	5142.200931971397	7509.332564629771	3161.105908059374
2	DALYs (Disability-Adjusted Life Years)	68	Republic of Korea	1	Male	32	90-94 years	441	Colon and rectum cancer	3	Rate	2021	4768.065405394358	6731.547377215738	3188.404773025796
2	DALYs (Disability-Adjusted Life Years)	68	Republic of Korea	2	Female	32	90-94 years	441	Colon and rectum cancer	3	Rate	2021	3440.228405354929	5023.883651351612	2114.8388561844777
2	DALYs (Disability-Adjusted Life Years)	68	Republic of Korea	1	Male	235	95+ years	441	Colon and rectum cancer	1	Number	2021	546.409119200558	785.817771670254	339.996892468041
2	DALYs (Disability-Adjusted Life Years)	68	Republic of Korea	2	Female	235	95+ years	441	Colon and rectum cancer	1	Number	2021	1706.01413648924	2454.722453657892	1046.5366147273517
2	DALYs (Disability-Adjusted Life Years)	68	Republic of Korea	1	Male	235	95+ years	441	Colon and rectum cancer	3	Rate	2021	5348.608971151748	7692.097067112236	3328.1114192949594
2	DALYs (Disability-Adjusted Life Years)	68	Republic of Korea	2	Female	235	95+ years	441	Colon and rectum cancer	3	Rate	2021	3996.4229902777024	5750.3094720758	2451.5640860225462
2	DALYs (Disability-Adjusted Life Years)	71	Australia	1	Male	1	<5 years	441	Colon and rectum cancer	1	Number	2021	0	0	0
2	DALYs (Disability-Adjusted Life Years)	71	Australia	2	Female	1	<5 years	441	Colon and rectum cancer	1	Number	2021	0	0	0
2	DALYs (Disability-Adjusted Life Years)	71	Australia	1	Male	1	<5 years	441	Colon and rectum cancer	3	Rate	2021	0	0	0
2	DALYs (Disability-Adjusted Life Years)	71	Australia	2	Female	1	<5 years	441	Colon and rectum cancer	3	Rate	2021	0	0	0
2	DALYs (Disability-Adjusted Life Years)	71	Australia	1	Male	6	5-9 years	441	Colon and rectum cancer	1	Number	2021	0	0	0
2	DALYs (Disability-Adjusted Life Years)	71	Australia	2	Female	6	5-9 years	441	Colon and rectum cancer	1	Number	2021	0	0	0
2	DALYs (Disability-Adjusted Life Years)	71	Australia	1	Male	6	5-9 years	441	Colon and rectum cancer	3	Rate	2021	0	0	0
2	DALYs (Disability-Adjusted Life Years)	71	Australia	2	Female	6	5-9 years	441	Colon and rectum cancer	3	Rate	2021	0	0	0
2	DALYs (Disability-Adjusted Life Years)	71	Australia	1	Male	7	10-14 years	441	Colon and rectum cancer	1	Number	2021	0	0	0
2	DALYs (Disability-Adjusted Life Years)	71	Australia	2	Female	7	10-14 years	441	Colon and rectum cancer	1	Number	2021	0	0	0
2	DALYs (Disability-Adjusted Life Years)	71	Australia	1	Male	7	10-14 years	441	Colon and rectum cancer	3	Rate	2021	0	0	0
2	DALYs (Disability-Adjusted Life Years)	71	Australia	2	Female	7	10-14 years	441	Colon and rectum cancer	3	Rate	2021	0	0	0
2	DALYs (Disability-Adjusted Life Years)	71	Australia	1	Male	8	15-19 years	441	Colon and rectum cancer	1	Number	2021	39.8334079029325	51.07520287568285	29.81458566477229
2	DALYs (Disability-Adjusted Life Years)	71	Australia	2	Female	8	15-19 years	441	Colon and rectum cancer	1	Number	2021	31.201421597042803	37.122289494458606	25.996100881971905
2	DALYs (Disability-Adjusted Life Years)	71	Australia	1	Male	8	15-19 years	441	Colon and rectum cancer	3	Rate	2021	5.20305962027984	6.671468490159041	3.894396059352246
2	DALYs (Disability-Adjusted Life Years)	71	Australia	2	Female	8	15-19 years	441	Colon and rectum cancer	3	Rate	2021	4.313756407890659	5.132346732479339	3.5940941476335406
2	DALYs (Disability-Adjusted Life Years)	71	Australia	1	Male	9	20-24 years	441	Colon and rectum cancer	1	Number	2021	101.4507848408239	126.32961490059247	80.4327253106518
2	DALYs (Disability-Adjusted Life Years)	71	Australia	2	Female	9	20-24 years	441	Colon and rectum cancer	1	Number	2021	96.52852493660345	124.66935412485401	73.53871466452202
2	DALYs (Disability-Adjusted Life Years)	71	Australia	1	Male	9	20-24 years	441	Colon and rectum cancer	3	Rate	2021	12.309633609153028	15.328331622585257	9.759386093594397
2	DALYs (Disability-Adjusted Life Years)	71	Australia	2	Female	9	20-24 years	441	Colon and rectum cancer	3	Rate	2021	12.240625065973296	15.809117792503642	9.325324660593328
2	DALYs (Disability-Adjusted Life Years)	71	Australia	1	Male	10	25-29 years	441	Colon and rectum cancer	1	Number	2021	332.7138637235026	425.26461235539887	251.31427164924247
2	DALYs (Disability-Adjusted Life Years)	71	Australia	2	Female	10	25-29 years	441	Colon and rectum cancer	1	Number	2021	317.62687630721433	387.9628968264261	253.81101011817046
2	DALYs (Disability-Adjusted Life Years)	71	Australia	1	Male	10	25-29 years	441	Colon and rectum cancer	3	Rate	2021	36.771278691156766	46.999915793717705	27.77505878011469
2	DALYs (Disability-Adjusted Life Years)	71	Australia	2	Female	10	25-29 years	441	Colon and rectum cancer	3	Rate	2021	35.23896040142548	43.04235623079183	28.158939945463544
2	DALYs (Disability-Adjusted Life Years)	71	Australia	1	Male	11	30-34 years	441	Colon and rectum cancer	1	Number	2021	790.5573841136672	958.9851267900153	633.9441565666303
2	DALYs (Disability-Adjusted Life Years)	71	Australia	2	Female	11	30-34 years	441	Colon and rectum cancer	1	Number	2021	624.8711093297229	772.4718164663615	497.57633302453655
2	DALYs (Disability-Adjusted Life Years)	71	Australia	1	Male	11	30-34 years	441	Colon and rectum cancer	3	Rate	2021	85.69014410690524	103.94637424473142	68.71451361222682
2	DALYs (Disability-Adjusted Life Years)	71	Australia	2	Female	11	30-34 years	441	Colon and rectum cancer	3	Rate	2021	64.74610840739078	80.03977656165587	51.5564421493509
2	DALYs (Disability-Adjusted Life Years)	71	Australia	1	Male	12	35-39 years	441	Colon and rectum cancer	1	Number	2021	1269.6013129134917	1611.3186469561986	968.6884937449242
2	DALYs (Disability-Adjusted Life Years)	71	Australia	2	Female	12	35-39 years	441	Colon and rectum cancer	1	Number	2021	1095.9894638362039	1347.0720905602088	893.7629633566821
2	DALYs (Disability-Adjusted Life Years)	71	Australia	1	Male	12	35-39 years	441	Colon and rectum cancer	3	Rate	2021	137.92708940213316	175.0506153495093	105.23648890451136
2	DALYs (Disability-Adjusted Life Years)	71	Australia	2	Female	12	35-39 years	441	Colon and rectum cancer	3	Rate	2021	114.9388278673879	141.27041568439907	93.73088956524215
2	DALYs (Disability-Adjusted Life Years)	71	Australia	1	Male	13	40-44 years	441	Colon and rectum cancer	1	Number	2021	1880.4596697261893	2293.082110288365	1485.349696088124
2	DALYs (Disability-Adjusted Life Years)	71	Australia	2	Female	13	40-44 years	441	Colon and rectum cancer	1	Number	2021	1731.8240877568198	2082.9624957992264	1418.8587474980222
2	DALYs (Disability-Adjusted Life Years)	71	Australia	1	Male	13	40-44 years	441	Colon and rectum cancer	3	Rate	2021	226.5157780016043	276.21931307314924	178.9217537767445
2	DALYs (Disability-Adjusted Life Years)	71	Australia	2	Female	13	40-44 years	441	Colon and rectum cancer	3	Rate	2021	204.24525361200037	245.65728483997017	167.3352199978359
2	DALYs (Disability-Adjusted Life Years)	71	Australia	1	Male	14	45-49 years	441	Colon and rectum cancer	1	Number	2021	3212.7126833787447	3868.954637982347	2612.4373000256664
2	DALYs (Disability-Adjusted Life Years)	71	Australia	2	Female	14	45-49 years	441	Colon and rectum cancer	1	Number	2021	2651.7590361282737	3160.0534731701214	2187.7071004402806
2	DALYs (Disability-Adjusted Life Years)	71	Australia	1	Male	14	45-49 years	441	Colon and rectum cancer	3	Rate	2021	394.00519841790594	474.48632667797233	320.3877776174005
2	DALYs (Disability-Adjusted Life Years)	71	Australia	2	Female	14	45-49 years	441	Colon and rectum cancer	3	Rate	2021	313.9943193109002	374.1813738637528	259.04601153252764
2	DALYs (Disability-Adjusted Life Years)	71	Australia	1	Male	15	50-54 years	441	Colon and rectum cancer	1	Number	2021	4952.8111587145195	5950.589253750546	4003.0785178710557
2	DALYs (Disability-Adjusted Life Years)	71	Australia	2	Female	15	50-54 years	441	Colon and rectum cancer	1	Number	2021	3926.8548671886547	4806.42618012828	3129.4806331396776
2	DALYs (Disability-Adjusted Life Years)	71	Australia	1	Male	15	50-54 years	441	Colon and rectum cancer	3	Rate	2021	622.2650500853775	747.6246522154196	502.9418192203501
2	DALYs (Disability-Adjusted Life Years)	71	Australia	2	Female	15	50-54 years	441	Colon and rectum cancer	3	Rate	2021	472.408463677196	578.2226449224073	376.48275477710115
2	DALYs (Disability-Adjusted Life Years)	71	Australia	1	Male	16	55-59 years	441	Colon and rectum cancer	1	Number	2021	6910.569566212501	8165.5194666990055	5820.538412566788
2	DALYs (Disability-Adjusted Life Years)	71	Australia	2	Female	16	55-59 years	441	Colon and rectum cancer	1	Number	2021	4953.358375843065	6059.610730747967	3969.7224084351224
2	DALYs (Disability-Adjusted Life Years)	71	Australia	1	Male	16	55-59 years	441	Colon and rectum cancer	3	Rate	2021	910.9842525791732	1076.4177361965856	767.2911450461869
2	DALYs (Disability-Adjusted Life Years)	71	Australia	2	Female	16	55-59 years	441	Colon and rectum cancer	3	Rate	2021	626.3210456859398	766.1997056059663	501.9464575911726
2	DALYs (Disability-Adjusted Life Years)	71	Australia	1	Male	17	60-64 years	441	Colon and rectum cancer	1	Number	2021	9122.053435458682	10628.260734417961	7654.645360001554
2	DALYs (Disability-Adjusted Life Years)	71	Australia	2	Female	17	60-64 years	441	Colon and rectum cancer	1	Number	2021	6065.894705466678	7357.765486848864	4898.04314511747
2	DALYs (Disability-Adjusted Life Years)	71	Australia	1	Male	17	60-64 years	441	Colon and rectum cancer	3	Rate	2021	1278.1376081586827	1489.1800240033094	1072.5315501556702
2	DALYs (Disability-Adjusted Life Years)	71	Australia	2	Female	17	60-64 years	441	Colon and rectum cancer	3	Rate	2021	800.030205773927	970.4149053518935	646.0023880313017
2	DALYs (Disability-Adjusted Life Years)	71	Australia	1	Male	18	65-69 years	441	Colon and rectum cancer	1	Number	2021	10950.414027656168	13174.112173494796	8959.42451451604
2	DALYs (Disability-Adjusted Life Years)	71	Australia	2	Female	18	65-69 years	441	Colon and rectum cancer	1	Number	2021	6103.968445462526	7499.749058427966	4947.378561511203
2	DALYs (Disability-Adjusted Life Years)	71	Australia	1	Male	18	65-69 years	441	Colon and rectum cancer	3	Rate	2021	1741.9723446720939	2095.714282024086	1425.249281812288
2	DALYs (Disability-Adjusted Life Years)	71	Australia	2	Female	18	65-69 years	441	Colon and rectum cancer	3	Rate	2021	905.7395949925839	1112.8530128257958	734.1185811517742
2	DALYs (Disability-Adjusted Life Years)	71	Australia	1	Male	19	70-74 years	441	Colon and rectum cancer	1	Number	2021	11302.059489580559	13627.239537620926	9365.242707042245
2	DALYs (Disability-Adjusted Life Years)	71	Australia	2	Female	19	70-74 years	441	Colon and rectum cancer	1	Number	2021	7019.453057722131	8453.314326977128	5710.8390843216275
2	DALYs (Disability-Adjusted Life Years)	71	Australia	1	Male	19	70-74 years	441	Colon and rectum cancer	3	Rate	2021	2003.2538690285248	2415.3845901346162	1659.9592936640788
2	DALYs (Disability-Adjusted Life Years)	71	Australia	2	Female	19	70-74 years	441	Colon and rectum cancer	3	Rate	2021	1167.9716911738094	1406.5528680531147	950.2304992265481
2	DALYs (Disability-Adjusted Life Years)	71	Australia	1	Male	20	75-79 years	441	Colon and rectum cancer	1	Number	2021	9987.823156909672	11948.081686919806	8280.035498908028
2	DALYs (Disability-Adjusted Life Years)	71	Australia	2	Female	20	75-79 years	441	Colon and rectum cancer	1	Number	2021	7122.234798656815	8502.673734204758	5622.495036667641
2	DALYs (Disability-Adjusted Life Years)	71	Australia	1	Male	20	75-79 years	441	Colon and rectum cancer	3	Rate	2021	2532.799664764339	3029.899189822139	2099.723914451035
2	DALYs (Disability-Adjusted Life Years)	71	Australia	2	Female	20	75-79 years	441	Colon and rectum cancer	3	Rate	2021	1657.3411455547152	1978.5687253083104	1308.3523119321774
2	DALYs (Disability-Adjusted Life Years)	71	Australia	1	Male	30	80-84 years	441	Colon and rectum cancer	1	Number	2021	7427.739250591694	8723.437184483448	6088.269499080353
2	DALYs (Disability-Adjusted Life Years)	71	Australia	2	Female	30	80-84 years	441	Colon and rectum cancer	1	Number	2021	6235.954087300235	7555.889148167027	4790.228871159759
2	DALYs (Disability-Adjusted Life Years)	71	Australia	1	Male	30	80-84 years	441	Colon and rectum cancer	3	Rate	2021	2935.588587977536	3447.6738860573855	2406.203806980464
2	DALYs (Disability-Adjusted Life Years)	71	Australia	2	Female	30	80-84 years	441	Colon and rectum cancer	3	Rate	2021	2068.185834907099	2505.948999559227	1588.7037265832012
2	DALYs (Disability-Adjusted Life Years)	71	Australia	1	Male	31	85-89 years	441	Colon and rectum cancer	1	Number	2021	4903.490417931819	5998.69504446742	3903.8570929678335
2	DALYs (Disability-Adjusted Life Years)	71	Australia	2	Female	31	85-89 years	441	Colon and rectum cancer	1	Number	2021	5179.726816494511	6615.247500745823	3691.1656173822985
2	DALYs (Disability-Adjusted Life Years)	71	Australia	1	Male	31	85-89 years	441	Colon and rectum cancer	3	Rate	2021	3586.622531936192	4387.702019365905	2855.4479804618286
2	DALYs (Disability-Adjusted Life Years)	71	Australia	2	Female	31	85-89 years	441	Colon and rectum cancer	3	Rate	2021	2724.009400763764	3478.947253169233	1941.177633057129
2	DALYs (Disability-Adjusted Life Years)	71	Australia	1	Male	32	90-94 years	441	Colon and rectum cancer	1	Number	2021	2445.457165567862	2996.452978186322	1950.360934004893
2	DALYs (Disability-Adjusted Life Years)	71	Australia	2	Female	32	90-94 years	441	Colon and rectum cancer	1	Number	2021	3769.6960809254556	4804.5905235395985	2673.440234101607
2	DALYs (Disability-Adjusted Life Years)	71	Australia	1	Male	32	90-94 years	441	Colon and rectum cancer	3	Rate	2021	4198.597136107614	5144.599983117184	3348.5680907388078
2	DALYs (Disability-Adjusted Life Years)	71	Australia	2	Female	32	90-94 years	441	Colon and rectum cancer	3	Rate	2021	3668.5052734758833	4675.61980969304	2601.6764711484675
2	DALYs (Disability-Adjusted Life Years)	71	Australia	1	Male	235	95+ years	441	Colon and rectum cancer	1	Number	2021	722.3420286185502	898.1588361485987	551.922113938658
2	DALYs (Disability-Adjusted Life Years)	71	Australia	2	Female	235	95+ years	441	Colon and rectum cancer	1	Number	2021	1538.4298983177378	1952.3323852741432	1115.4232372522968
2	DALYs (Disability-Adjusted Life Years)	71	Australia	1	Male	235	95+ years	441	Colon and rectum cancer	3	Rate	2021	4698.981546165998	5842.705573507331	3590.3654024930424
2	DALYs (Disability-Adjusted Life Years)	71	Australia	2	Female	235	95+ years	441	Colon and rectum cancer	3	Rate	2021	4170.730935286303	5292.833351801146	3023.9468217774634
2	DALYs (Disability-Adjusted Life Years)	6	China	1	Male	1	<5 years	441	Colon and rectum cancer	1	Number	2021	0	0	0
2	DALYs (Disability-Adjusted Life Years)	6	China	2	Female	1	<5 years	441	Colon and rectum cancer	1	Number	2021	0	0	0
2	DALYs (Disability-Adjusted Life Years)	6	China	1	Male	1	<5 years	441	Colon and rectum cancer	3	Rate	2021	0	0	0
2	DALYs (Disability-Adjusted Life Years)	6	China	2	Female	1	<5 years	441	Colon and rectum cancer	3	Rate	2021	0	0	0
2	DALYs (Disability-Adjusted Life Years)	6	China	1	Male	6	5-9 years	441	Colon and rectum cancer	1	Number	2021	0	0	0
2	DALYs (Disability-Adjusted Life Years)	6	China	2	Female	6	5-9 years	441	Colon and rectum cancer	1	Number	2021	0	0	0
2	DALYs (Disability-Adjusted Life Years)	6	China	1	Male	6	5-9 years	441	Colon and rectum cancer	3	Rate	2021	0	0	0
2	DALYs (Disability-Adjusted Life Years)	6	China	2	Female	6	5-9 years	441	Colon and rectum cancer	3	Rate	2021	0	0	0
2	DALYs (Disability-Adjusted Life Years)	6	China	1	Male	7	10-14 years	441	Colon and rectum cancer	1	Number	2021	0	0	0
2	DALYs (Disability-Adjusted Life Years)	6	China	2	Female	7	10-14 years	441	Colon and rectum cancer	1	Number	2021	0	0	0
2	DALYs (Disability-Adjusted Life Years)	6	China	1	Male	7	10-14 years	441	Colon and rectum cancer	3	Rate	2021	0	0	0
2	DALYs (Disability-Adjusted Life Years)	6	China	2	Female	7	10-14 years	441	Colon and rectum cancer	3	Rate	2021	0	0	0
2	DALYs (Disability-Adjusted Life Years)	6	China	1	Male	8	15-19 years	441	Colon and rectum cancer	1	Number	2021	9491.369859885444	12512.60864599458	6765.383089818595
2	DALYs (Disability-Adjusted Life Years)	6	China	2	Female	8	15-19 years	441	Colon and rectum cancer	1	Number	2021	4163.529495704653	5318.172611378826	3236.8644991675737
2	DALYs (Disability-Adjusted Life Years)	6	China	1	Male	8	15-19 years	441	Colon and rectum cancer	3	Rate	2021	23.6794012114448	31.216893315110404	16.878514155265666
2	DALYs (Disability-Adjusted Life Years)	6	China	2	Female	8	15-19 years	441	Colon and rectum cancer	3	Rate	2021	12.037029711338443	15.375176709864794	9.357982017000838
2	DALYs (Disability-Adjusted Life Years)	6	China	1	Male	9	20-24 years	441	Colon and rectum cancer	1	Number	2021	20097.160484067783	26335.596591108195	14764.89308087021
2	DALYs (Disability-Adjusted Life Years)	6	China	2	Female	9	20-24 years	441	Colon and rectum cancer	1	Number	2021	8422.014799050314	11249.027335620427	5987.074639475495
2	DALYs (Disability-Adjusted Life Years)	6	China	1	Male	9	20-24 years	441	Colon and rectum cancer	3	Rate	2021	51.70684671248025	67.75736587751658	37.9877577165165
2	DALYs (Disability-Adjusted Life Years)	6	China	2	Female	9	20-24 years	441	Colon and rectum cancer	3	Rate	2021	24.54921654076516	32.78963698404714	17.451642543632328
2	DALYs (Disability-Adjusted Life Years)	6	China	1	Male	10	25-29 years	441	Colon and rectum cancer	1	Number	2021	46055.79570939992	57855.764470111884	35529.86989306446
2	DALYs (Disability-Adjusted Life Years)	6	China	2	Female	10	25-29 years	441	Colon and rectum cancer	1	Number	2021	17380.931277778207	23688.873529519726	12188.018321407639
2	DALYs (Disability-Adjusted Life Years)	6	China	1	Male	10	25-29 years	441	Colon and rectum cancer	3	Rate	2021	100.96470927242528	126.83290668380619	77.88950183110605
2	DALYs (Disability-Adjusted Life Years)	6	China	2	Female	10	25-29 years	441	Colon and rectum cancer	3	Rate	2021	42.53117270816444	57.96671969090595	29.824104584131586
2	DALYs (Disability-Adjusted Life Years)	6	China	1	Male	11	30-34 years	441	Colon and rectum cancer	1	Number	2021	128783.11309286916	161071.94243778265	99029.21328694826
2	DALYs (Disability-Adjusted Life Years)	6	China	2	Female	11	30-34 years	441	Colon and rectum cancer	1	Number	2021	43399.31311042636	58759.00079451206	30951.687598030512
2	DALYs (Disability-Adjusted Life Years)	6	China	1	Male	11	30-34 years	441	Colon and rectum cancer	3	Rate	2021	205.4488153016109	256.9594643073122	157.98216133649728
2	DALYs (Disability-Adjusted Life Years)	6	China	2	Female	11	30-34 years	441	Colon and rectum cancer	3	Rate	2021	74.22557779512836	100.49515699798629	52.936480580983826
2	DALYs (Disability-Adjusted Life Years)	6	China	1	Male	12	35-39 years	441	Colon and rectum cancer	1	Number	2021	171795.7756117869	220633.9905557842	130884.60130480434
2	DALYs (Disability-Adjusted Life Years)	6	China	2	Female	12	35-39 years	441	Colon and rectum cancer	1	Number	2021	59487.14075049889	79859.34638366823	43456.072140473894
2	DALYs (Disability-Adjusted Life Years)	6	China	1	Male	12	35-39 years	441	Colon and rectum cancer	3	Rate	2021	315.99794225386444	405.8300430182577	240.7466920403019
2	DALYs (Disability-Adjusted Life Years)	6	China	2	Female	12	35-39 years	441	Colon and rectum cancer	3	Rate	2021	115.29152470492424	154.77472425726862	84.22184612596968
2	DALYs (Disability-Adjusted Life Years)	6	China	1	Male	13	40-44 years	441	Colon and rectum cancer	1	Number	2021	210683.23383725237	278426.7113762515	155213.83675171214
2	DALYs (Disability-Adjusted Life Years)	6	China	2	Female	13	40-44 years	441	Colon and rectum cancer	1	Number	2021	79403.26064342464	105931.37367720596	58222.88531669804
2	DALYs (Disability-Adjusted Life Years)	6	China	1	Male	13	40-44 years	441	Colon and rectum cancer	3	Rate	2021	448.975719072409	593.3402040225154	330.76786745840053
2	DALYs (Disability-Adjusted Life Years)	6	China	2	Female	13	40-44 years	441	Colon and rectum cancer	3	Rate	2021	178.00078049625503	237.4696837483657	130.52006863617905
2	DALYs (Disability-Adjusted Life Years)	6	China	1	Male	14	45-49 years	441	Colon and rectum cancer	1	Number	2021	318302.86652125913	434823.51380083396	232712.5567967457
2	DALYs (Disability-Adjusted Life Years)	6	China	2	Female	14	45-49 years	441	Colon and rectum cancer	1	Number	2021	126086.75790482532	171094.11068920392	90711.68806522158
2	DALYs (Disability-Adjusted Life Years)	6	China	1	Male	14	45-49 years	441	Colon and rectum cancer	3	Rate	2021	567.7746255484055	775.6190210477461	415.10240306572786
2	DALYs (Disability-Adjusted Life Years)	6	China	2	Female	14	45-49 years	441	Colon and rectum cancer	3	Rate	2021	232.37481250666502	315.3222634402977	167.1794235698423
2	DALYs (Disability-Adjusted Life Years)	6	China	1	Male	15	50-54 years	441	Colon and rectum cancer	1	Number	2021	489214.83642795234	671207.645433147	360018.6325709736
2	DALYs (Disability-Adjusted Life Years)	6	China	2	Female	15	50-54 years	441	Colon and rectum cancer	1	Number	2021	220928.64497328878	296845.6004318291	161159.96822985745
2	DALYs (Disability-Adjusted Life Years)	6	China	1	Male	15	50-54 years	441	Colon and rectum cancer	3	Rate	2021	800.1415488992861	1097.8022027527286	588.8330542084168
2	DALYs (Disability-Adjusted Life Years)	6	China	2	Female	15	50-54 years	441	Colon and rectum cancer	3	Rate	2021	369.95320665462754	497.07896309394846	269.8683416005298
2	DALYs (Disability-Adjusted Life Years)	6	China	1	Male	16	55-59 years	441	Colon and rectum cancer	1	Number	2021	575614.4066334113	781673.4515453877	420711.9313054692
2	DALYs (Disability-Adjusted Life Years)	6	China	2	Female	16	55-59 years	441	Colon and rectum cancer	1	Number	2021	280955.4091623473	369833.38457670796	210705.43899608124
2	DALYs (Disability-Adjusted Life Years)	6	China	1	Male	16	55-59 years	441	Colon and rectum cancer	3	Rate	2021	1048.792017863876	1424.2396769596824	766.5536343225716
2	DALYs (Disability-Adjusted Life Years)	6	China	2	Female	16	55-59 years	441	Colon and rectum cancer	3	Rate	2021	510.2823517062483	671.7060539390942	382.6915710531449
2	DALYs (Disability-Adjusted Life Years)	6	China	1	Male	17	60-64 years	441	Colon and rectum cancer	1	Number	2021	499348.59886788105	667612.0259309302	374160.3757291113
2	DALYs (Disability-Adjusted Life Years)	6	China	2	Female	17	60-64 years	441	Colon and rectum cancer	1	Number	2021	260258.23596853908	341731.819329371	196437.35615768973
2	DALYs (Disability-Adjusted Life Years)	6	China	1	Male	17	60-64 years	441	Colon and rectum cancer	3	Rate	2021	1363.3962065999326	1822.8141737022358	1021.5886018016984
2	DALYs (Disability-Adjusted Life Years)	6	China	2	Female	17	60-64 years	441	Colon and rectum cancer	3	Rate	2021	715.391787800847	939.3444794116981	539.962437267533
2	DALYs (Disability-Adjusted Life Years)	6	China	1	Male	18	65-69 years	441	Colon and rectum cancer	1	Number	2021	632043.6911894737	837849.5628083943	469135.6997108957
2	DALYs (Disability-Adjusted Life Years)	6	China	2	Female	18	65-69 years	441	Colon and rectum cancer	1	Number	2021	360124.48671883706	465044.3970444694	274454.80064509663
2	DALYs (Disability-Adjusted Life Years)	6	China	1	Male	18	65-69 years	441	Colon and rectum cancer	3	Rate	2021	1674.7277909056397	2220.0521372069447	1243.070067724591
2	DALYs (Disability-Adjusted Life Years)	6	China	2	Female	18	65-69 years	441	Colon and rectum cancer	3	Rate	2021	924.2628643072525	1193.5407957358368	704.390813516554
2	DALYs (Disability-Adjusted Life Years)	6	China	1	Male	19	70-74 years	441	Colon and rectum cancer	1	Number	2021	566440.8933817707	753636.6720635127	431478.22759154317
2	DALYs (Disability-Adjusted Life Years)	6	China	2	Female	19	70-74 years	441	Colon and rectum cancer	1	Number	2021	344945.5589775921	435270.4746412138	261059.41483461155
2	DALYs (Disability-Adjusted Life Years)	6	China	1	Male	19	70-74 years	441	Colon and rectum cancer	3	Rate	2021	2190.7105130497403	2914.6903053777437	1668.7423178322406
2	DALYs (Disability-Adjusted Life Years)	6	China	2	Female	19	70-74 years	441	Colon and rectum cancer	3	Rate	2021	1257.0925218329805	1586.2655552602905	951.3844419837925
2	DALYs (Disability-Adjusted Life Years)	6	China	1	Male	20	75-79 years	441	Colon and rectum cancer	1	Number	2021	402484.1738293195	519959.01058222656	309355.90766999795
2	DALYs (Disability-Adjusted Life Years)	6	China	2	Female	20	75-79 years	441	Colon and rectum cancer	1	Number	2021	250404.21409156328	319517.99790734827	189844.99961891535
2	DALYs (Disability-Adjusted Life Years)	6	China	1	Male	20	75-79 years	441	Colon and rectum cancer	3	Rate	2021	2579.6247611664685	3332.5512546943824	1982.7417109251865
2	DALYs (Disability-Adjusted Life Years)	6	China	2	Female	20	75-79 years	441	Colon and rectum cancer	3	Rate	2021	1429.5328957985662	1824.0966529470297	1083.806329069482
2	DALYs (Disability-Adjusted Life Years)	6	China	1	Male	30	80-84 years	441	Colon and rectum cancer	1	Number	2021	243300.3718277256	304665.7019678358	190833.79393622105
2	DALYs (Disability-Adjusted Life Years)	6	China	2	Female	30	80-84 years	441	Colon and rectum cancer	1	Number	2021	169668.44551058253	214669.24063095194	127748.45777605835
2	DALYs (Disability-Adjusted Life Years)	6	China	1	Male	30	80-84 years	441	Colon and rectum cancer	3	Rate	2021	2804.623262180275	3512.006613506141	2199.8194810101472
2	DALYs (Disability-Adjusted Life Years)	6	China	2	Female	30	80-84 years	441	Colon and rectum cancer	3	Rate	2021	1526.2234870417824	1931.0204440810278	1149.1394060012458
2	DALYs (Disability-Adjusted Life Years)	6	China	1	Male	31	85-89 years	441	Colon and rectum cancer	1	Number	2021	135007.97386702296	163948.0350805893	108856.2119112266
2	DALYs (Disability-Adjusted Life Years)	6	China	2	Female	31	85-89 years	441	Colon and rectum cancer	1	Number	2021	91689.89814425913	118923.09279661597	64984.740816301855
2	DALYs (Disability-Adjusted Life Years)	6	China	1	Male	31	85-89 years	441	Colon and rectum cancer	3	Rate	2021	3878.519307324084	4709.911579624339	3127.2295074637877
2	DALYs (Disability-Adjusted Life Years)	6	China	2	Female	31	85-89 years	441	Colon and rectum cancer	3	Rate	2021	1516.830279036706	1967.3502935600482	1075.0456107000361
2	DALYs (Disability-Adjusted Life Years)	6	China	1	Male	32	90-94 years	441	Colon and rectum cancer	1	Number	2021	35433.89396948429	44564.62028291235	27577.808694383704
2	DALYs (Disability-Adjusted Life Years)	6	China	2	Female	32	90-94 years	441	Colon and rectum cancer	1	Number	2021	33713.89697913182	42854.20348105539	24120.68952732005
2	DALYs (Disability-Adjusted Life Years)	6	China	1	Male	32	90-94 years	441	Colon and rectum cancer	3	Rate	2021	4380.857422535534	5509.731663051423	3409.5729930247453
2	DALYs (Disability-Adjusted Life Years)	6	China	2	Female	32	90-94 years	441	Colon and rectum cancer	3	Rate	2021	1587.916643916951	2018.4229373273708	1136.0788219437436
2	DALYs (Disability-Adjusted Life Years)	6	China	1	Male	235	95+ years	441	Colon and rectum cancer	1	Number	2021	4173.332098367303	5022.412881476304	3259.7647945272774
2	DALYs (Disability-Adjusted Life Years)	6	China	2	Female	235	95+ years	441	Colon and rectum cancer	1	Number	2021	9086.66657237675	11955.224031902791	6244.636855799932
2	DALYs (Disability-Adjusted Life Years)	6	China	1	Male	235	95+ years	441	Colon and rectum cancer	3	Rate	2021	3450.6407433716363	4152.687135930723	2695.2748903459797
2	DALYs (Disability-Adjusted Life Years)	6	China	2	Female	235	95+ years	441	Colon and rectum cancer	3	Rate	2021	1753.6587864269693	2307.268952839477	1205.1682762862565
2	DALYs (Disability-Adjusted Life Years)	67	Japan	1	Male	1	<5 years	441	Colon and rectum cancer	1	Number	2021	0	0	0
2	DALYs (Disability-Adjusted Life Years)	67	Japan	2	Female	1	<5 years	441	Colon and rectum cancer	1	Number	2021	0	0	0
2	DALYs (Disability-Adjusted Life Years)	67	Japan	1	Male	1	<5 years	441	Colon and rectum cancer	3	Rate	2021	0	0	0
2	DALYs (Disability-Adjusted Life Years)	67	Japan	2	Female	1	<5 years	441	Colon and rectum cancer	3	Rate	2021	0	0	0
2	DALYs (Disability-Adjusted Life Years)	67	Japan	1	Male	6	5-9 years	441	Colon and rectum cancer	1	Number	2021	0	0	0
2	DALYs (Disability-Adjusted Life Years)	67	Japan	2	Female	6	5-9 years	441	Colon and rectum cancer	1	Number	2021	0	0	0
2	DALYs (Disability-Adjusted Life Years)	67	Japan	1	Male	6	5-9 years	441	Colon and rectum cancer	3	Rate	2021	0	0	0
2	DALYs (Disability-Adjusted Life Years)	67	Japan	2	Female	6	5-9 years	441	Colon and rectum cancer	3	Rate	2021	0	0	0
2	DALYs (Disability-Adjusted Life Years)	67	Japan	1	Male	7	10-14 years	441	Colon and rectum cancer	1	Number	2021	0	0	0
2	DALYs (Disability-Adjusted Life Years)	67	Japan	2	Female	7	10-14 years	441	Colon and rectum cancer	1	Number	2021	0	0	0
2	DALYs (Disability-Adjusted Life Years)	67	Japan	1	Male	7	10-14 years	441	Colon and rectum cancer	3	Rate	2021	0	0	0
2	DALYs (Disability-Adjusted Life Years)	67	Japan	2	Female	7	10-14 years	441	Colon and rectum cancer	3	Rate	2021	0	0	0
2	DALYs (Disability-Adjusted Life Years)	67	Japan	1	Male	8	15-19 years	441	Colon and rectum cancer	1	Number	2021	223.01117556588474	234.35156404466218	212.31490284868875
2	DALYs (Disability-Adjusted Life Years)	67	Japan	2	Female	8	15-19 years	441	Colon and rectum cancer	1	Number	2021	207.72179072555795	215.37427596150167	198.0880613097663
2	DALYs (Disability-Adjusted Life Years)	67	Japan	1	Male	8	15-19 years	441	Colon and rectum cancer	3	Rate	2021	7.491756414748761	7.872721305481442	7.132429714911331
2	DALYs (Disability-Adjusted Life Years)	67	Japan	2	Female	8	15-19 years	441	Colon and rectum cancer	3	Rate	2021	7.386714768791836	7.658841855280268	7.0441334194514
2	DALYs (Disability-Adjusted Life Years)	67	Japan	1	Male	9	20-24 years	441	Colon and rectum cancer	1	Number	2021	565.2795325969604	595.2080226761393	535.850797619083
2	DALYs (Disability-Adjusted Life Years)	67	Japan	2	Female	9	20-24 years	441	Colon and rectum cancer	1	Number	2021	457.2981952699842	477.61365337014695	439.4206899264442
2	DALYs (Disability-Adjusted Life Years)	67	Japan	1	Male	9	20-24 years	441	Colon and rectum cancer	3	Rate	2021	17.905608122820468	18.85361310825407	16.97343321522494
2	DALYs (Disability-Adjusted Life Years)	67	Japan	2	Female	9	20-24 years	441	Colon and rectum cancer	3	Rate	2021	15.10144451905285	15.772325722066617	14.51107228956013
2	DALYs (Disability-Adjusted Life Years)	67	Japan	1	Male	10	25-29 years	441	Colon and rectum cancer	1	Number	2021	973.2610253919023	1031.0133454754045	919.8002569927748
2	DALYs (Disability-Adjusted Life Years)	67	Japan	2	Female	10	25-29 years	441	Colon and rectum cancer	1	Number	2021	927.3652257727787	972.0737844468576	886.4552065650025
2	DALYs (Disability-Adjusted Life Years)	67	Japan	1	Male	10	25-29 years	441	Colon and rectum cancer	3	Rate	2021	30.16821283936252	31.958363928115386	28.511087158231554
2	DALYs (Disability-Adjusted Life Years)	67	Japan	2	Female	10	25-29 years	441	Colon and rectum cancer	3	Rate	2021	30.10745254352012	31.558941958003306	28.779284926682585
2	DALYs (Disability-Adjusted Life Years)	67	Japan	1	Male	11	30-34 years	441	Colon and rectum cancer	1	Number	2021	2137.628097061285	2240.19809979431	2042.747171434703
2	DALYs (Disability-Adjusted Life Years)	67	Japan	2	Female	11	30-34 years	441	Colon and rectum cancer	1	Number	2021	1968.3910777834744	2049.204917513718	1884.0100726075018
2	DALYs (Disability-Adjusted Life Years)	67	Japan	1	Male	11	30-34 years	441	Colon and rectum cancer	3	Rate	2021	63.215917658861244	66.24921276569215	60.41001106077143
2	DALYs (Disability-Adjusted Life Years)	67	Japan	2	Female	11	30-34 years	441	Colon and rectum cancer	3	Rate	2021	60.71595101865252	63.208692014113645	58.11317912286744
2	DALYs (Disability-Adjusted Life Years)	67	Japan	1	Male	12	35-39 years	441	Colon and rectum cancer	1	Number	2021	4598.1057906911665	4818.453418525326	4384.5839870404325
2	DALYs (Disability-Adjusted Life Years)	67	Japan	2	Female	12	35-39 years	441	Colon and rectum cancer	1	Number	2021	3975.1363298826654	4140.388842700973	3821.1863360283987
2	DALYs (Disability-Adjusted Life Years)	67	Japan	1	Male	12	35-39 years	441	Colon and rectum cancer	3	Rate	2021	120.5603343646812	126.33775334924017	114.96188552202993
2	DALYs (Disability-Adjusted Life Years)	67	Japan	2	Female	12	35-39 years	441	Colon and rectum cancer	3	Rate	2021	107.65642805038075	112.13187084780907	103.48708514957578
2	DALYs (Disability-Adjusted Life Years)	67	Japan	1	Male	13	40-44 years	441	Colon and rectum cancer	1	Number	2021	9124.850365797942	9483.012817578034	8703.312050157294
2	DALYs (Disability-Adjusted Life Years)	67	Japan	2	Female	13	40-44 years	441	Colon and rectum cancer	1	Number	2021	7717.82039937446	8008.452705704043	7405.217652379477
2	DALYs (Disability-Adjusted Life Years)	67	Japan	1	Male	13	40-44 years	441	Colon and rectum cancer	3	Rate	2021	215.28677784950514	223.73706876928088	205.34123111982495
2	DALYs (Disability-Adjusted Life Years)	67	Japan	2	Female	13	40-44 years	441	Colon and rectum cancer	3	Rate	2021	187.51762774875306	194.57903599744594	179.92241012111904
2	DALYs (Disability-Adjusted Life Years)	67	Japan	1	Male	14	45-49 years	441	Colon and rectum cancer	1	Number	2021	20188.09301067343	21165.336723421347	19161.802785037074
2	DALYs (Disability-Adjusted Life Years)	67	Japan	2	Female	14	45-49 years	441	Colon and rectum cancer	1	Number	2021	15019.736368692455	15709.083258261564	14436.368315738653
2	DALYs (Disability-Adjusted Life Years)	67	Japan	1	Male	14	45-49 years	441	Colon and rectum cancer	3	Rate	2021	402.2073888884086	421.67701595046697	381.76060812131726
2	DALYs (Disability-Adjusted Life Years)	67	Japan	2	Female	14	45-49 years	441	Colon and rectum cancer	3	Rate	2021	306.79436641232905	320.8750224925849	294.8784427371166
2	DALYs (Disability-Adjusted Life Years)	67	Japan	1	Male	15	50-54 years	441	Colon and rectum cancer	1	Number	2021	33137.265727865335	34674.15905121766	31585.41110695603
2	DALYs (Disability-Adjusted Life Years)	67	Japan	2	Female	15	50-54 years	441	Colon and rectum cancer	1	Number	2021	23024.39153370054	24032.939631976195	22025.984264674873
2	DALYs (Disability-Adjusted Life Years)	67	Japan	1	Male	15	50-54 years	441	Colon and rectum cancer	3	Rate	2021	702.5472440957495	735.1311083667947	669.6461835160801
2	DALYs (Disability-Adjusted Life Years)	67	Japan	2	Female	15	50-54 years	441	Colon and rectum cancer	3	Rate	2021	494.50512386842865	516.1661611008391	473.0618857477592
2	DALYs (Disability-Adjusted Life Years)	67	Japan	1	Male	16	55-59 years	441	Colon and rectum cancer	1	Number	2021	45589.422596313496	47673.12221967164	43443.71928691086
2	DALYs (Disability-Adjusted Life Years)	67	Japan	2	Female	16	55-59 years	441	Colon and rectum cancer	1	Number	2021	27312.391740549443	28679.0157131471	25452.69315452089
2	DALYs (Disability-Adjusted Life Years)	67	Japan	1	Male	16	55-59 years	441	Colon and rectum cancer	3	Rate	2021	1156.454262693766	1209.3108942186593	1102.0248008291755
2	DALYs (Disability-Adjusted Life Years)	67	Japan	2	Female	16	55-59 years	441	Colon and rectum cancer	3	Rate	2021	691.1173891705871	725.6986737717963	644.0592609909125
2	DALYs (Disability-Adjusted Life Years)	67	Japan	1	Male	17	60-64 years	441	Colon and rectum cancer	1	Number	2021	62051.96761899727	65369.43442544018	58805.76959984174
2	DALYs (Disability-Adjusted Life Years)	67	Japan	2	Female	17	60-64 years	441	Colon and rectum cancer	1	Number	2021	32581.75850447096	34516.19141128686	29879.447842693822
2	DALYs (Disability-Adjusted Life Years)	67	Japan	1	Male	17	60-64 years	441	Colon and rectum cancer	3	Rate	2021	1682.1440502448493	1772.0760421618033	1594.1440577648802
2	DALYs (Disability-Adjusted Life Years)	67	Japan	2	Female	17	60-64 years	441	Colon and rectum cancer	3	Rate	2021	864.4639301953181	915.7885839304988	792.7658327777708
2	DALYs (Disability-Adjusted Life Years)	67	Japan	1	Male	18	65-69 years	441	Colon and rectum cancer	1	Number	2021	91046.57458228167	95286.9733835728	86093.10903963675
2	DALYs (Disability-Adjusted Life Years)	67	Japan	2	Female	18	65-69 years	441	Colon and rectum cancer	1	Number	2021	44988.28656278423	48218.999344084834	39980.57316536385
2	DALYs (Disability-Adjusted Life Years)	67	Japan	1	Male	18	65-69 years	441	Colon and rectum cancer	3	Rate	2021	2354.577219713667	2464.239186304161	2226.4744637466324
2	DALYs (Disability-Adjusted Life Years)	67	Japan	2	Female	18	65-69 years	441	Colon and rectum cancer	3	Rate	2021	1102.6508610022872	1181.8347664613389	979.9131461170524
2	DALYs (Disability-Adjusted Life Years)	67	Japan	1	Male	19	70-74 years	441	Colon and rectum cancer	1	Number	2021	127723.86466912217	135049.95992058565	119681.28179072717
2	DALYs (Disability-Adjusted Life Years)	67	Japan	2	Female	19	70-74 years	441	Colon and rectum cancer	1	Number	2021	65689.19650683878	71678.24473978882	55549.06470752838
2	DALYs (Disability-Adjusted Life Years)	67	Japan	1	Male	19	70-74 years	441	Colon and rectum cancer	3	Rate	2021	2766.3442249927743	2925.018575656489	2592.151620053125
2	DALYs (Disability-Adjusted Life Years)	67	Japan	2	Female	19	70-74 years	441	Colon and rectum cancer	3	Rate	2021	1277.8984758245988	1394.4076739197537	1080.6353083621943
2	DALYs (Disability-Adjusted Life Years)	67	Japan	1	Male	20	75-79 years	441	Colon and rectum cancer	1	Number	2021	94109.45366532834	100123.60078789451	86591.31041985325
2	DALYs (Disability-Adjusted Life Years)	67	Japan	2	Female	20	75-79 years	441	Colon and rectum cancer	1	Number	2021	58921.7285682129	65560.70620823714	47932.22392096239
2	DALYs (Disability-Adjusted Life Years)	67	Japan	1	Male	20	75-79 years	441	Colon and rectum cancer	3	Rate	2021	3084.0808619960308	3281.1717526508182	2837.7021954747033
2	DALYs (Disability-Adjusted Life Years)	67	Japan	2	Female	20	75-79 years	441	Colon and rectum cancer	3	Rate	2021	1574.7143407268784	1752.1445273753948	1281.014020216492
2	DALYs (Disability-Adjusted Life Years)	67	Japan	1	Male	30	80-84 years	441	Colon and rectum cancer	1	Number	2021	76655.64751556964	82453.77438818186	66690.25960290454
2	DALYs (Disability-Adjusted Life Years)	67	Japan	2	Female	30	80-84 years	441	Colon and rectum cancer	1	Number	2021	61489.12088965384	71660.95165636973	44140.43917704254
2	DALYs (Disability-Adjusted Life Years)	67	Japan	1	Male	30	80-84 years	441	Colon and rectum cancer	3	Rate	2021	3259.3269221613796	3505.857890544026	2835.6078855837545
2	DALYs (Disability-Adjusted Life Years)	67	Japan	2	Female	30	80-84 years	441	Colon and rectum cancer	3	Rate	2021	1889.7081253341285	2202.3128751057416	1356.5415371340785
2	DALYs (Disability-Adjusted Life Years)	67	Japan	1	Male	31	85-89 years	441	Colon and rectum cancer	1	Number	2021	57485.05962242593	62609.76005998359	48741.51959004541
2	DALYs (Disability-Adjusted Life Years)	67	Japan	2	Female	31	85-89 years	441	Colon and rectum cancer	1	Number	2021	67912.58787786533	81577.1461533256	45227.00744036969
2	DALYs (Disability-Adjusted Life Years)	67	Japan	1	Male	31	85-89 years	441	Colon and rectum cancer	3	Rate	2021	4063.7648107703985	4426.042895557519	3445.6617673269297
2	DALYs (Disability-Adjusted Life Years)	67	Japan	2	Female	31	85-89 years	441	Colon and rectum cancer	3	Rate	2021	2749.650338594125	3302.9020767907277	1831.154727098002
2	DALYs (Disability-Adjusted Life Years)	67	Japan	1	Male	32	90-94 years	441	Colon and rectum cancer	1	Number	2021	29455.189390095606	32227.332128326667	24232.281946841926
2	DALYs (Disability-Adjusted Life Years)	67	Japan	2	Female	32	90-94 years	441	Colon and rectum cancer	1	Number	2021	60221.965849826185	72578.19339716066	39232.65412532767
2	DALYs (Disability-Adjusted Life Years)	67	Japan	1	Male	32	90-94 years	441	Colon and rectum cancer	3	Rate	2021	4966.575593487084	5433.999390462919	4085.91703478068
2	DALYs (Disability-Adjusted Life Years)	67	Japan	2	Female	32	90-94 years	441	Colon and rectum cancer	3	Rate	2021	4344.261873071007	5235.609199107021	2830.1454642157746
2	DALYs (Disability-Adjusted Life Years)	67	Japan	1	Male	235	95+ years	441	Colon and rectum cancer	1	Number	2021	8976.914275654206	10264.157231422832	6496.170328283708
2	DALYs (Disability-Adjusted Life Years)	67	Japan	2	Female	235	95+ years	441	Colon and rectum cancer	1	Number	2021	35134.49684732807	42919.28403412983	21780.96365306082
2	DALYs (Disability-Adjusted Life Years)	67	Japan	1	Male	235	95+ years	441	Colon and rectum cancer	3	Rate	2021	3973.122716993192	4542.847911286757	2875.1618999815128
2	DALYs (Disability-Adjusted Life Years)	67	Japan	2	Female	235	95+ years	441	Colon and rectum cancer	3	Rate	2021	5355.876223833471	6542.583316369102	3320.2736862440934
5	Prevalence	68	Republic of Korea	1	Male	235	95+ years	441	Colon and rectum cancer	1	Number	2021	141.30741526081016	163.96446030798796	122.47996745395092
5	Prevalence	68	Republic of Korea	2	Female	235	95+ years	441	Colon and rectum cancer	1	Number	2021	307.6088392572963	360.4791229594532	259.25533129802113
5	Prevalence	68	Republic of Korea	1	Male	235	95+ years	441	Colon and rectum cancer	3	Rate	2021	1383.20917860966	1604.99111844336	1198.91383523949
5	Prevalence	68	Republic of Korea	2	Female	235	95+ years	441	Colon and rectum cancer	3	Rate	2021	720.58900974309	844.44027965379	607.31851172325
5	Prevalence	67	Japan	1	Male	1	<5 years	441	Colon and rectum cancer	1	Number	2021	0	0	0
5	Prevalence	67	Japan	2	Female	1	<5 years	441	Colon and rectum cancer	1	Number	2021	0	0	0
5	Prevalence	67	Japan	1	Male	1	<5 years	441	Colon and rectum cancer	3	Rate	2021	0	0	0
5	Prevalence	67	Japan	2	Female	1	<5 years	441	Colon and rectum cancer	3	Rate	2021	0	0	0
5	Prevalence	67	Japan	1	Male	6	5-9 years	441	Colon and rectum cancer	1	Number	2021	0	0	0
5	Prevalence	67	Japan	2	Female	6	5-9 years	441	Colon and rectum cancer	1	Number	2021	0	0	0
5	Prevalence	67	Japan	1	Male	6	5-9 years	441	Colon and rectum cancer	3	Rate	2021	0	0	0
5	Prevalence	67	Japan	2	Female	6	5-9 years	441	Colon and rectum cancer	3	Rate	2021	0	0	0
5	Prevalence	67	Japan	1	Male	7	10-14 years	441	Colon and rectum cancer	1	Number	2021	0	0	0
5	Prevalence	67	Japan	2	Female	7	10-14 years	441	Colon and rectum cancer	1	Number	2021	0	0	0
5	Prevalence	67	Japan	1	Male	7	10-14 years	441	Colon and rectum cancer	3	Rate	2021	0	0	0
5	Prevalence	67	Japan	2	Female	7	10-14 years	441	Colon and rectum cancer	3	Rate	2021	0	0	0
5	Prevalence	67	Japan	1	Male	8	15-19 years	441	Colon and rectum cancer	1	Number	2021	97.03580515864782	111.84174913815151	83.08244957818019
5	Prevalence	67	Japan	2	Female	8	15-19 years	441	Colon and rectum cancer	1	Number	2021	75.80465388488807	89.99143099639551	62.64614287896876
5	Prevalence	67	Japan	1	Male	8	15-19 years	441	Colon and rectum cancer	3	Rate	2021	3.25979	3.75717	2.79104
5	Prevalence	67	Japan	2	Female	8	15-19 years	441	Colon and rectum cancer	3	Rate	2021	2.69566	3.20015	2.22774
5	Prevalence	67	Japan	1	Male	9	20-24 years	441	Colon and rectum cancer	1	Number	2021	253.76138344689403	295.2879678485174	218.5847665013708
5	Prevalence	67	Japan	2	Female	9	20-24 years	441	Colon and rectum cancer	1	Number	2021	177.82177906037245	211.5626804296094	146.5502566149206
5	Prevalence	67	Japan	1	Male	9	20-24 years	441	Colon and rectum cancer	3	Rate	2021	8.03806	9.35344	6.92382
5	Prevalence	67	Japan	2	Female	9	20-24 years	441	Colon and rectum cancer	3	Rate	2021	5.8722421355200005	6.986474282770001	4.83956
5	Prevalence	67	Japan	1	Male	10	25-29 years	441	Colon and rectum cancer	1	Number	2021	525.4759802310825	614.0044550619684	450.9167080804671
5	Prevalence	67	Japan	2	Female	10	25-29 years	441	Colon and rectum cancer	1	Number	2021	449.36914971352894	534.3942644470158	375.11362151268656
5	Prevalence	67	Japan	1	Male	10	25-29 years	441	Colon and rectum cancer	3	Rate	2021	16.2882	19.0323	13.977084119559999
5	Prevalence	67	Japan	2	Female	10	25-29 years	441	Colon and rectum cancer	3	Rate	2021	14.589	17.3494	12.1783
5	Prevalence	68	Republic of Korea	1	Male	1	<5 years	441	Colon and rectum cancer	1	Number	2021	0	0	0
5	Prevalence	68	Republic of Korea	2	Female	1	<5 years	441	Colon and rectum cancer	1	Number	2021	0	0	0
5	Prevalence	68	Republic of Korea	1	Male	1	<5 years	441	Colon and rectum cancer	3	Rate	2021	0	0	0
5	Prevalence	68	Republic of Korea	2	Female	1	<5 years	441	Colon and rectum cancer	3	Rate	2021	0	0	0
5	Prevalence	68	Republic of Korea	1	Male	6	5-9 years	441	Colon and rectum cancer	1	Number	2021	0	0	0
5	Prevalence	68	Republic of Korea	2	Female	6	5-9 years	441	Colon and rectum cancer	1	Number	2021	0	0	0
5	Prevalence	68	Republic of Korea	1	Male	6	5-9 years	441	Colon and rectum cancer	3	Rate	2021	0	0	0
5	Prevalence	68	Republic of Korea	2	Female	6	5-9 years	441	Colon and rectum cancer	3	Rate	2021	0	0	0
5	Prevalence	68	Republic of Korea	1	Male	7	10-14 years	441	Colon and rectum cancer	1	Number	2021	0	0	0
5	Prevalence	68	Republic of Korea	2	Female	7	10-14 years	441	Colon and rectum cancer	1	Number	2021	0	0	0
5	Prevalence	68	Republic of Korea	1	Male	7	10-14 years	441	Colon and rectum cancer	3	Rate	2021	0	0	0
5	Prevalence	68	Republic of Korea	2	Female	7	10-14 years	441	Colon and rectum cancer	3	Rate	2021	0	0	0
5	Prevalence	68	Republic of Korea	1	Male	8	15-19 years	441	Colon and rectum cancer	1	Number	2021	32.99565023865948	52.27918855226203	20.01187819054581
5	Prevalence	68	Republic of Korea	2	Female	8	15-19 years	441	Colon and rectum cancer	1	Number	2021	23.92069345160116	35.95896410308465	15.238635082649878
5	Prevalence	68	Republic of Korea	1	Male	8	15-19 years	441	Colon and rectum cancer	3	Rate	2021	2.76554	4.3817874648099995	1.6772983558299999
5	Prevalence	68	Republic of Korea	2	Female	8	15-19 years	441	Colon and rectum cancer	3	Rate	2021	2.14408	3.2231	1.36588
5	Prevalence	68	Republic of Korea	1	Male	9	20-24 years	441	Colon and rectum cancer	1	Number	2021	83.17752496450343	132.0794181467036	53.63793062691453
5	Prevalence	68	Republic of Korea	2	Female	9	20-24 years	441	Colon and rectum cancer	1	Number	2021	75.10089631505873	116.09022691306204	48.277709279669736
5	Prevalence	68	Republic of Korea	1	Male	9	20-24 years	441	Colon and rectum cancer	3	Rate	2021	5.20047	8.25794	3.35358
5	Prevalence	68	Republic of Korea	2	Female	9	20-24 years	441	Colon and rectum cancer	3	Rate	2021	5.07204	7.840309006119999	3.2604997761199996
5	Prevalence	68	Republic of Korea	1	Male	10	25-29 years	441	Colon and rectum cancer	1	Number	2021	295.61573636509905	446.73624877569296	191.6810394978008
5	Prevalence	68	Republic of Korea	2	Female	10	25-29 years	441	Colon and rectum cancer	1	Number	2021	216.16023844207183	332.65803867154466	142.53713279218346
5	Prevalence	68	Republic of Korea	1	Male	10	25-29 years	441	Colon and rectum cancer	3	Rate	2021	15.6133	23.5948	10.1238
5	Prevalence	68	Republic of Korea	2	Female	10	25-29 years	441	Colon and rectum cancer	3	Rate	2021	12.889274338609999	19.8358	8.49925
5	Prevalence	6	China	1	Male	1	<5 years	441	Colon and rectum cancer	1	Number	2021	0	0	0
5	Prevalence	6	China	2	Female	1	<5 years	441	Colon and rectum cancer	1	Number	2021	0	0	0
5	Prevalence	6	China	1	Male	1	<5 years	441	Colon and rectum cancer	3	Rate	2021	0	0	0
5	Prevalence	6	China	2	Female	1	<5 years	441	Colon and rectum cancer	3	Rate	2021	0	0	0
5	Prevalence	6	China	1	Male	6	5-9 years	441	Colon and rectum cancer	1	Number	2021	0	0	0
5	Prevalence	6	China	2	Female	6	5-9 years	441	Colon and rectum cancer	1	Number	2021	0	0	0
5	Prevalence	6	China	1	Male	6	5-9 years	441	Colon and rectum cancer	3	Rate	2021	0	0	0
5	Prevalence	6	China	2	Female	6	5-9 years	441	Colon and rectum cancer	3	Rate	2021	0	0	0
5	Prevalence	6	China	1	Male	7	10-14 years	441	Colon and rectum cancer	1	Number	2021	0	0	0
5	Prevalence	6	China	2	Female	7	10-14 years	441	Colon and rectum cancer	1	Number	2021	0	0	0
5	Prevalence	6	China	1	Male	7	10-14 years	441	Colon and rectum cancer	3	Rate	2021	0	0	0
5	Prevalence	6	China	2	Female	7	10-14 years	441	Colon and rectum cancer	3	Rate	2021	0	0	0
5	Prevalence	6	China	1	Male	8	15-19 years	441	Colon and rectum cancer	1	Number	2021	2491.228658645787	3282.5310020641527	1763.636639358056
5	Prevalence	6	China	2	Female	8	15-19 years	441	Colon and rectum cancer	1	Number	2021	1125.734940619385	1433.8915356144216	864.5418655228304
5	Prevalence	6	China	1	Male	8	15-19 years	441	Colon and rectum cancer	3	Rate	2021	6.2152043159599994	8.189373055139999	4.39998
5	Prevalence	6	China	2	Female	8	15-19 years	441	Colon and rectum cancer	3	Rate	2021	3.2545716179800004	4.1454720171499995	2.49945
5	Prevalence	6	China	1	Male	9	20-24 years	441	Colon and rectum cancer	1	Number	2021	5554.140886879277	7267.264489520864	4144.759193757448
5	Prevalence	6	China	2	Female	9	20-24 years	441	Colon and rectum cancer	1	Number	2021	2457.242194504121	3286.004758769669	1752.2773238642044
5	Prevalence	6	China	1	Male	9	20-24 years	441	Colon and rectum cancer	3	Rate	2021	14.289934724110001	18.6975	10.6638
5	Prevalence	6	China	2	Female	9	20-24 years	441	Colon and rectum cancer	3	Rate	2021	7.16258	9.57833	5.10769
5	Prevalence	6	China	1	Male	10	25-29 years	441	Colon and rectum cancer	1	Number	2021	15767.99434325987	19726.63398359292	12076.72870463498
5	Prevalence	6	China	2	Female	10	25-29 years	441	Colon and rectum cancer	1	Number	2021	6528.151779817286	8957.230786479531	4542.247937250347
5	Prevalence	6	China	1	Male	10	25-29 years	441	Colon and rectum cancer	3	Rate	2021	34.567005957759996	43.2452	26.4749
5	Prevalence	6	China	2	Female	10	25-29 years	441	Colon and rectum cancer	3	Rate	2021	15.974400127080001	21.9184	11.1149
5	Prevalence	6	China	1	Male	235	95+ years	441	Colon and rectum cancer	1	Number	2021	583.24692909975	693.3060665762371	488.14597370977833
5	Prevalence	6	China	2	Female	235	95+ years	441	Colon and rectum cancer	1	Number	2021	1270.1739519577018	1510.801563073962	1036.38054717129
5	Prevalence	6	China	1	Male	235	95+ years	441	Colon and rectum cancer	3	Rate	2021	482.24669629942	573.2470133135599	403.61426934002
5	Prevalence	6	China	2	Female	235	95+ years	441	Colon and rectum cancer	3	Rate	2021	245.13408667516	291.57341853903	200.01370559297
5	Prevalence	71	Australia	1	Male	235	95+ years	441	Colon and rectum cancer	1	Number	2021	223.9883143171373	254.3592431669285	199.1350347831224
5	Prevalence	71	Australia	2	Female	235	95+ years	441	Colon and rectum cancer	1	Number	2021	395.83942993856914	447.5277617169722	350.5221192218548
5	Prevalence	71	Australia	1	Male	235	95+ years	441	Colon and rectum cancer	3	Rate	2021	1457.0894587789	1654.65851685796	1295.41382969306
5	Prevalence	71	Australia	2	Female	235	95+ years	441	Colon and rectum cancer	3	Rate	2021	1073.1329114548298	1213.26	950.27628346232
5	Prevalence	67	Japan	1	Male	235	95+ years	441	Colon and rectum cancer	1	Number	2021	3184.5462688056955	3787.552228723529	2642.676613942077
5	Prevalence	67	Japan	2	Female	235	95+ years	441	Colon and rectum cancer	1	Number	2021	6013.460647350198	7087.127842584083	4851.039185572421
5	Prevalence	67	Japan	1	Male	235	95+ years	441	Colon and rectum cancer	3	Rate	2021	1409.45905635104	1676.34549463746	1169.6311411812699
5	Prevalence	67	Japan	2	Female	235	95+ years	441	Colon and rectum cancer	3	Rate	2021	916.68740964339	1080.35642782375	739.48875795179
5	Prevalence	6	China	1	Male	11	30-34 years	441	Colon and rectum cancer	1	Number	2021	48507.21342555521	60940.99849468224	37572.61514638821
5	Prevalence	6	China	2	Female	11	30-34 years	441	Colon and rectum cancer	1	Number	2021	18003.443781015914	24417.567803848924	12788.04431765317
5	Prevalence	6	China	1	Male	11	30-34 years	441	Colon and rectum cancer	3	Rate	2021	77.384	97.21970251642999	59.9399
5	Prevalence	6	China	2	Female	11	30-34 years	441	Colon and rectum cancer	3	Rate	2021	30.791178965150003	41.761215758889996	21.8713
5	Prevalence	6	China	1	Male	12	35-39 years	441	Colon and rectum cancer	1	Number	2021	67135.48600144403	85977.98860035877	50884.73800318083
5	Prevalence	6	China	2	Female	12	35-39 years	441	Colon and rectum cancer	1	Number	2021	25408.81748310021	34029.78023288118	18361.79986299827
5	Prevalence	6	China	1	Male	12	35-39 years	441	Colon and rectum cancer	3	Rate	2021	123.48775953961	158.14630703279	93.5964
5	Prevalence	6	China	2	Female	12	35-39 years	441	Colon and rectum cancer	3	Rate	2021	49.2446	65.9528	35.5868
5	Prevalence	6	China	1	Male	13	40-44 years	441	Colon and rectum cancer	1	Number	2021	90865.06029086928	119193.50032765334	68238.99322953605
5	Prevalence	6	China	2	Female	13	40-44 years	441	Colon and rectum cancer	1	Number	2021	37671.916294858645	50412.47210549538	27486.600249279625
5	Prevalence	6	China	1	Male	13	40-44 years	441	Colon and rectum cancer	3	Rate	2021	193.63764756983	254.00686397145	145.42045181286002
5	Prevalence	6	China	2	Female	13	40-44 years	441	Colon and rectum cancer	3	Rate	2021	84.45031663607999	113.01122030517999	61.6176
5	Prevalence	6	China	1	Male	14	45-49 years	441	Colon and rectum cancer	1	Number	2021	144392.7082761864	196156.02697776584	105512.38169233478
5	Prevalence	6	China	2	Female	14	45-49 years	441	Colon and rectum cancer	1	Number	2021	62657.323709381	84144.0156759152	45609.0221653444
5	Prevalence	6	China	1	Male	14	45-49 years	441	Colon and rectum cancer	3	Rate	2021	257.56134957067997	349.89447623754	188.20833648409
5	Prevalence	6	China	2	Female	14	45-49 years	441	Colon and rectum cancer	3	Rate	2021	115.47591587791001	155.07536390941002	84.05631289435999
5	Prevalence	6	China	1	Male	15	50-54 years	441	Colon and rectum cancer	1	Number	2021	247588.6238203979	335683.6527208646	182133.4915322014
5	Prevalence	6	China	2	Female	15	50-54 years	441	Colon and rectum cancer	1	Number	2021	123383.73120544836	163151.8234753823	89584.59482887157
5	Prevalence	6	China	1	Male	15	50-54 years	441	Colon and rectum cancer	3	Rate	2021	404.94672320239005	549.03166835538	297.89074895007
5	Prevalence	6	China	2	Female	15	50-54 years	441	Colon and rectum cancer	3	Rate	2021	206.611	273.20377705464	150.01272527518
5	Prevalence	6	China	1	Male	16	55-59 years	441	Colon and rectum cancer	1	Number	2021	311443.8650798152	422923.7258892847	229541.41761045728
5	Prevalence	6	China	2	Female	16	55-59 years	441	Colon and rectum cancer	1	Number	2021	165820.53286048153	218594.18283261167	124776.22447489422
5	Prevalence	6	China	1	Male	16	55-59 years	441	Colon and rectum cancer	3	Rate	2021	567.4629334223899	770.58361077543	418.23346286106005
5	Prevalence	6	China	2	Female	16	55-59 years	441	Colon and rectum cancer	3	Rate	2021	301.17	397.01942033326	226.62352524874
5	Prevalence	6	China	1	Male	17	60-64 years	441	Colon and rectum cancer	1	Number	2021	286000.8727207433	379872.74227743095	216137.7488464764
5	Prevalence	6	China	2	Female	17	60-64 years	441	Colon and rectum cancer	1	Number	2021	162125.21369225282	210984.5438372618	122311.7355786885
5	Prevalence	6	China	1	Male	17	60-64 years	441	Colon and rectum cancer	3	Rate	2021	780.88234519088	1037.18535905774	590.1315985434501
5	Prevalence	6	China	2	Female	17	60-64 years	441	Colon and rectum cancer	3	Rate	2021	445.64601784558005	579.94940852642	336.20765490487
5	Prevalence	6	China	1	Male	18	65-69 years	441	Colon and rectum cancer	1	Number	2021	380041.31902296346	501382.2871890733	284583.9919669481
5	Prevalence	6	China	2	Female	18	65-69 years	441	Colon and rectum cancer	1	Number	2021	234497.69494208248	303528.7926641924	177051.39124252822
5	Prevalence	6	China	1	Male	18	65-69 years	441	Colon and rectum cancer	3	Rate	2021	1006.99645852392	1328.51393333764	754.06293399903
5	Prevalence	6	China	2	Female	18	65-69 years	441	Colon and rectum cancer	3	Rate	2021	601.841	779.00948603519	454.40405202761
5	Prevalence	6	China	1	Male	19	70-74 years	441	Colon and rectum cancer	1	Number	2021	333014.19959113793	431533.92565676937	254615.0070388699
5	Prevalence	6	China	2	Female	19	70-74 years	441	Colon and rectum cancer	1	Number	2021	220762.0015880392	277098.6542400622	169920.83001948358
5	Prevalence	6	China	1	Male	19	70-74 years	441	Colon and rectum cancer	3	Rate	2021	1287.9326273279	1668.9577301346899	984.72370059685
5	Prevalence	6	China	2	Female	19	70-74 years	441	Colon and rectum cancer	3	Rate	2021	804.52771191999	1009.83658722155	619.24613656215
5	Prevalence	6	China	1	Male	20	75-79 years	441	Colon and rectum cancer	1	Number	2021	210980.5692266341	267656.61077420024	164045.05524962628
5	Prevalence	6	China	2	Female	20	75-79 years	441	Colon and rectum cancer	1	Number	2021	144346.18234618162	183733.15498895332	110476.76431511372
5	Prevalence	6	China	1	Male	20	75-79 years	441	Colon and rectum cancer	3	Rate	2021	1352.22882262402	1715.48017422375	1051.40702165425
5	Prevalence	6	China	2	Female	20	75-79 years	441	Colon and rectum cancer	3	Rate	2021	824.05808063338	1048.91441247679	630.70092243771
5	Prevalence	6	China	1	Male	30	80-84 years	441	Colon and rectum cancer	1	Number	2021	97415.4025460274	118825.94322851708	78870.89449231682
5	Prevalence	6	China	2	Female	30	80-84 years	441	Colon and rectum cancer	1	Number	2021	75893.76037942838	94222.92015769448	57940.24091420963
5	Prevalence	6	China	1	Male	30	80-84 years	441	Colon and rectum cancer	3	Rate	2021	1122.9473346990899	1369.75542628921	909.1771777428501
5	Prevalence	6	China	2	Female	30	80-84 years	441	Colon and rectum cancer	3	Rate	2021	682.68934310345	847.5661654680799	521.19152893759
5	Prevalence	6	China	1	Male	31	85-89 years	441	Colon and rectum cancer	1	Number	2021	36462.95296846198	43242.39881037126	30556.61746463266
5	Prevalence	6	China	2	Female	31	85-89 years	441	Colon and rectum cancer	1	Number	2021	32463.12600564021	41307.053391020105	23922.9903001425
5	Prevalence	6	China	1	Male	31	85-89 years	441	Colon and rectum cancer	3	Rate	2021	1047.51047689616	1242.2709109480102	877.83282282145
5	Prevalence	6	China	2	Female	31	85-89 years	441	Colon and rectum cancer	3	Rate	2021	537.039	683.34451874629	395.75914890062995
5	Prevalence	6	China	1	Male	32	90-94 years	441	Colon and rectum cancer	1	Number	2021	5467.275631303458	6444.179631242518	4641.849474621104
5	Prevalence	6	China	2	Female	32	90-94 years	441	Colon and rectum cancer	1	Number	2021	7559.180054807975	9079.35388975652	5880.08005260217
5	Prevalence	6	China	1	Male	32	90-94 years	441	Colon and rectum cancer	3	Rate	2021	675.9447621271901	796.72395571295	573.89348014359
5	Prevalence	6	China	2	Female	32	90-94 years	441	Colon and rectum cancer	3	Rate	2021	356.03560842652996	427.63543966692	276.95039196656
5	Prevalence	71	Australia	1	Male	1	<5 years	441	Colon and rectum cancer	1	Number	2021	0	0	0
5	Prevalence	71	Australia	2	Female	1	<5 years	441	Colon and rectum cancer	1	Number	2021	0	0	0
5	Prevalence	71	Australia	1	Male	1	<5 years	441	Colon and rectum cancer	3	Rate	2021	0	0	0
5	Prevalence	71	Australia	2	Female	1	<5 years	441	Colon and rectum cancer	3	Rate	2021	0	0	0
5	Prevalence	71	Australia	1	Male	6	5-9 years	441	Colon and rectum cancer	1	Number	2021	0	0	0
5	Prevalence	71	Australia	2	Female	6	5-9 years	441	Colon and rectum cancer	1	Number	2021	0	0	0
5	Prevalence	71	Australia	1	Male	6	5-9 years	441	Colon and rectum cancer	3	Rate	2021	0	0	0
5	Prevalence	71	Australia	2	Female	6	5-9 years	441	Colon and rectum cancer	3	Rate	2021	0	0	0
5	Prevalence	71	Australia	1	Male	7	10-14 years	441	Colon and rectum cancer	1	Number	2021	0	0	0
5	Prevalence	71	Australia	2	Female	7	10-14 years	441	Colon and rectum cancer	1	Number	2021	0	0	0
5	Prevalence	71	Australia	1	Male	7	10-14 years	441	Colon and rectum cancer	3	Rate	2021	0	0	0
5	Prevalence	71	Australia	2	Female	7	10-14 years	441	Colon and rectum cancer	3	Rate	2021	0	0	0
5	Prevalence	71	Australia	1	Male	8	15-19 years	441	Colon and rectum cancer	1	Number	2021	20.335917380531978	26.70514326933471	14.936562986508434
5	Prevalence	71	Australia	2	Female	8	15-19 years	441	Colon and rectum cancer	1	Number	2021	16.13010068087227	20.76097714061209	12.803567762352015
5	Prevalence	71	Australia	1	Male	8	15-19 years	441	Colon and rectum cancer	3	Rate	2021	2.65629	3.48824	1.95102
5	Prevalence	71	Australia	2	Female	8	15-19 years	441	Colon and rectum cancer	3	Rate	2021	2.2300690677099997	2.87031	1.7701588469899998
5	Prevalence	71	Australia	1	Male	9	20-24 years	441	Colon and rectum cancer	1	Number	2021	53.70362094979865	69.19629601446485	41.02339819585403
5	Prevalence	71	Australia	2	Female	9	20-24 years	441	Colon and rectum cancer	1	Number	2021	53.12298863619512	70.99165422898768	38.65128132496365
5	Prevalence	71	Australia	1	Male	9	20-24 years	441	Colon and rectum cancer	3	Rate	2021	6.51618	8.396	4.97762
5	Prevalence	71	Australia	2	Female	9	20-24 years	441	Colon and rectum cancer	3	Rate	2021	6.736439686680001	9.00234	4.90131
5	Prevalence	71	Australia	1	Male	10	25-29 years	441	Colon and rectum cancer	1	Number	2021	209.1310159199039	272.9936364725735	149.04377411159362
5	Prevalence	71	Australia	2	Female	10	25-29 years	441	Colon and rectum cancer	1	Number	2021	214.344853665624	274.78594272621353	159.48609306376113
5	Prevalence	71	Australia	1	Male	10	25-29 years	441	Colon and rectum cancer	3	Rate	2021	23.113	30.171	16.4722
5	Prevalence	71	Australia	2	Female	10	25-29 years	441	Colon and rectum cancer	3	Rate	2021	23.7804	30.486	17.6941
5	Prevalence	71	Australia	1	Male	11	30-34 years	441	Colon and rectum cancer	1	Number	2021	545.996480114168	703.6070186025977	424.6399752335993
5	Prevalence	71	Australia	2	Female	11	30-34 years	441	Colon and rectum cancer	1	Number	2021	462.688985484428	596.4222673698338	352.8160126945357
5	Prevalence	71	Australia	1	Male	11	30-34 years	441	Colon and rectum cancer	3	Rate	2021	59.181683712049995	76.2654	46.0276
5	Prevalence	71	Australia	2	Female	11	30-34 years	441	Colon and rectum cancer	3	Rate	2021	47.9416	61.7984	36.5571
5	Prevalence	71	Australia	1	Male	12	35-39 years	441	Colon and rectum cancer	1	Number	2021	859.9991093219627	1146.997571616043	635.0394480697697
5	Prevalence	71	Australia	2	Female	12	35-39 years	441	Colon and rectum cancer	1	Number	2021	808.288565033469	1032.687580707244	610.6398858042127
5	Prevalence	71	Australia	1	Male	12	35-39 years	441	Colon and rectum cancer	3	Rate	2021	93.42867940565999	124.60765044521	68.9895
5	Prevalence	71	Australia	2	Female	12	35-39 years	441	Colon and rectum cancer	3	Rate	2021	84.76700124322001	108.30022002605	64.0391
5	Prevalence	71	Australia	1	Male	13	40-44 years	441	Colon and rectum cancer	1	Number	2021	1364.298120496764	1730.0955492355854	1044.3069509368104
5	Prevalence	71	Australia	2	Female	13	40-44 years	441	Colon and rectum cancer	1	Number	2021	1350.6331115610972	1714.7405673362944	1042.3816373182503
5	Prevalence	71	Australia	1	Male	13	40-44 years	441	Colon and rectum cancer	3	Rate	2021	164.34016382571	208.40326738263	125.79477522023998
5	Prevalence	71	Australia	2	Female	13	40-44 years	441	Colon and rectum cancer	3	Rate	2021	159.28892799087	202.23048318263	122.93483118734001
5	Prevalence	71	Australia	1	Male	14	45-49 years	441	Colon and rectum cancer	1	Number	2021	2382.175665340704	2973.281401231377	1843.9435761638372
5	Prevalence	71	Australia	2	Female	14	45-49 years	441	Colon and rectum cancer	1	Number	2021	2040.9507453169872	2523.80523289502	1595.2262424736482
5	Prevalence	71	Australia	1	Male	14	45-49 years	441	Colon and rectum cancer	3	Rate	2021	292.14862584654	364.64148646258	226.14015823965997
5	Prevalence	71	Australia	2	Female	14	45-49 years	441	Colon and rectum cancer	3	Rate	2021	241.66861743159998	298.84333205976003	188.89045774073
5	Prevalence	71	Australia	1	Male	15	50-54 years	441	Colon and rectum cancer	1	Number	2021	3894.577614419557	4871.047919601055	3063.228959418549
5	Prevalence	71	Australia	2	Female	15	50-54 years	441	Colon and rectum cancer	1	Number	2021	3220.7020600327687	4070.355900659985	2474.072172510161
5	Prevalence	71	Australia	1	Male	15	50-54 years	441	Colon and rectum cancer	3	Rate	2021	489.30990030461004	611.99241814935	384.86028656709
5	Prevalence	71	Australia	2	Female	15	50-54 years	441	Colon and rectum cancer	3	Rate	2021	387.45687416538	489.67192388926003	297.63581124626
5	Prevalence	71	Australia	1	Male	16	55-59 years	441	Colon and rectum cancer	1	Number	2021	5535.000645220771	6826.028111916625	4479.538372824109
5	Prevalence	71	Australia	2	Female	16	55-59 years	441	Colon and rectum cancer	1	Number	2021	4311.86772416837	5399.622543820489	3334.5191860684804
5	Prevalence	71	Australia	1	Male	16	55-59 years	441	Colon and rectum cancer	3	Rate	2021	729.65019416991	899.8395947017301	590.5141215014801
5	Prevalence	71	Australia	2	Female	16	55-59 years	441	Colon and rectum cancer	3	Rate	2021	545.20858313647	682.7483459400199	421.62900097507
5	Prevalence	71	Australia	1	Male	17	60-64 years	441	Colon and rectum cancer	1	Number	2021	7596.52850246343	9180.013018755051	6178.571769642781
5	Prevalence	71	Australia	2	Female	17	60-64 years	441	Colon and rectum cancer	1	Number	2021	5501.967210353065	6740.117428637185	4324.770550912517
5	Prevalence	71	Australia	1	Male	17	60-64 years	441	Colon and rectum cancer	3	Rate	2021	1064.3884997106	1286.25862210455	865.71132249576
5	Prevalence	71	Australia	2	Female	17	60-64 years	441	Colon and rectum cancer	3	Rate	2021	725.6538685864799	888.9533688267601	570.39352672135
5	Prevalence	71	Australia	1	Male	18	65-69 years	441	Colon and rectum cancer	1	Number	2021	9789.052525858722	12052.766462506655	7775.378607111252
5	Prevalence	71	Australia	2	Female	18	65-69 years	441	Colon and rectum cancer	1	Number	2021	6099.267022116715	7556.482732489983	4834.682199633245
5	Prevalence	71	Australia	1	Male	18	65-69 years	441	Colon and rectum cancer	3	Rate	2021	1557.2250270648701	1917.3326050916198	1236.89336939545
5	Prevalence	71	Australia	2	Female	18	65-69 years	441	Colon and rectum cancer	3	Rate	2021	905.04197256626	1121.2714598453801	717.39609018929
5	Prevalence	67	Japan	1	Male	11	30-34 years	441	Colon and rectum cancer	1	Number	2021	1274.0240964554257	1477.753027322935	1099.4321035135792
5	Prevalence	67	Japan	2	Female	11	30-34 years	441	Colon and rectum cancer	1	Number	2021	1050.3807003095922	1249.1967568786758	880.4878791414322
5	Prevalence	67	Japan	1	Male	11	30-34 years	441	Colon and rectum cancer	3	Rate	2021	37.6766	43.7015	32.513424305550004
5	Prevalence	67	Japan	2	Female	11	30-34 years	441	Colon and rectum cancer	3	Rate	2021	32.399488023859995	38.5321	27.159063839420003
5	Prevalence	67	Japan	1	Male	12	35-39 years	441	Colon and rectum cancer	1	Number	2021	2996.218041762408	3431.871090965772	2574.997306221459
5	Prevalence	67	Japan	2	Female	12	35-39 years	441	Colon and rectum cancer	1	Number	2021	2367.7010410594	2778.063913425768	1997.445394435982
5	Prevalence	67	Japan	1	Male	12	35-39 years	441	Colon and rectum cancer	3	Rate	2021	78.5595	89.9822	67.5153
5	Prevalence	67	Japan	2	Female	12	35-39 years	441	Colon and rectum cancer	3	Rate	2021	64.1231	75.2368	54.095713592040006
5	Prevalence	67	Japan	1	Male	13	40-44 years	441	Colon and rectum cancer	1	Number	2021	6585.065408099554	7497.940273732549	5662.350729048565
5	Prevalence	67	Japan	2	Female	13	40-44 years	441	Colon and rectum cancer	1	Number	2021	5134.00545015548	6014.880596543497	4356.1353655476
5	Prevalence	67	Japan	1	Male	13	40-44 years	441	Colon and rectum cancer	3	Rate	2021	155.36446701107002	176.90234221158	133.59443658165
5	Prevalence	67	Japan	2	Female	13	40-44 years	441	Colon and rectum cancer	3	Rate	2021	124.73943069993001	146.14179681445	105.83974848211
5	Prevalence	67	Japan	1	Male	14	45-49 years	441	Colon and rectum cancer	1	Number	2021	14952.84361853868	17225.55132214124	12998.778348636726
5	Prevalence	67	Japan	2	Female	14	45-49 years	441	Colon and rectum cancer	1	Number	2021	10391.03684664582	12286.850519078242	8920.035163813674
5	Prevalence	67	Japan	1	Male	14	45-49 years	441	Colon and rectum cancer	3	Rate	2021	297.90551217935	343.18466909077	258.97466866138
5	Prevalence	67	Japan	2	Female	14	45-49 years	441	Colon and rectum cancer	3	Rate	2021	212.24817050576	250.97221600113	182.20136953683
5	Prevalence	67	Japan	1	Male	15	50-54 years	441	Colon and rectum cancer	1	Number	2021	26634.54062925609	30119.57288888797	23116.686319653832
5	Prevalence	67	Japan	2	Female	15	50-54 years	441	Colon and rectum cancer	1	Number	2021	17629.399896232546	20093.75641007517	15152.251739140076
5	Prevalence	67	Japan	1	Male	15	50-54 years	441	Colon and rectum cancer	3	Rate	2021	564.6821699324701	638.56876726661	490.09970828226
5	Prevalence	67	Japan	2	Female	15	50-54 years	441	Colon and rectum cancer	3	Rate	2021	378.63448276808	431.56256650701	325.43166720309
5	Prevalence	67	Japan	1	Male	16	55-59 years	441	Colon and rectum cancer	1	Number	2021	38189.59400751299	41563.94073906094	33550.61933382213
5	Prevalence	67	Japan	2	Female	16	55-59 years	441	Colon and rectum cancer	1	Number	2021	22248.730642051996	24936.6148870651	18967.978224564937
5	Prevalence	67	Japan	1	Male	16	55-59 years	441	Colon and rectum cancer	3	Rate	2021	968.7448593416401	1054.34097877618	851.06927297982
5	Prevalence	67	Japan	2	Female	16	55-59 years	441	Colon and rectum cancer	3	Rate	2021	562.9856506072899	631.00032905262	479.96893545369
5	Prevalence	67	Japan	1	Male	17	60-64 years	441	Colon and rectum cancer	1	Number	2021	54823.585195158965	60258.81586061436	49116.26740187021
5	Prevalence	67	Japan	2	Female	17	60-64 years	441	Colon and rectum cancer	1	Number	2021	28849.19829759463	32313.63576084571	24466.944064271025
5	Prevalence	67	Japan	1	Male	17	60-64 years	441	Colon and rectum cancer	3	Rate	2021	1486.1924800736601	1633.53415635606	1331.47489355352
5	Prevalence	67	Japan	2	Female	17	60-64 years	441	Colon and rectum cancer	3	Rate	2021	765.43110280252	857.35005877253	649.1604995097599
5	Prevalence	67	Japan	1	Male	18	65-69 years	441	Colon and rectum cancer	1	Number	2021	89289.97329621135	98317.86068156152	79344.66246943321
5	Prevalence	67	Japan	2	Female	18	65-69 years	441	Colon and rectum cancer	1	Number	2021	44351.16788468086	50340.10149017052	36837.39298325119
5	Prevalence	67	Japan	1	Male	18	65-69 years	441	Colon and rectum cancer	3	Rate	2021	2309.14933413667	2542.62168691009	2051.95127453761
5	Prevalence	67	Japan	2	Female	18	65-69 years	441	Colon and rectum cancer	3	Rate	2021	1087.03525274855	1233.82241227645	902.875
5	Prevalence	68	Republic of Korea	1	Male	11	30-34 years	441	Colon and rectum cancer	1	Number	2021	595.4097119748265	879.8373965609601	392.19479389229735
5	Prevalence	68	Republic of Korea	2	Female	11	30-34 years	441	Colon and rectum cancer	1	Number	2021	435.5528094221093	652.8504189527428	299.72849111240885
5	Prevalence	68	Republic of Korea	1	Male	11	30-34 years	441	Colon and rectum cancer	3	Rate	2021	32.9101	48.6312	21.6778
5	Prevalence	68	Republic of Korea	2	Female	11	30-34 years	441	Colon and rectum cancer	3	Rate	2021	27.726754148699996	41.5597	19.0803
5	Prevalence	68	Republic of Korea	1	Male	12	35-39 years	441	Colon and rectum cancer	1	Number	2021	1183.0495948105038	1680.1434246983576	791.6221489259455
5	Prevalence	68	Republic of Korea	2	Female	12	35-39 years	441	Colon and rectum cancer	1	Number	2021	1009.3267321865592	1461.117976617301	705.5161750760242
5	Prevalence	68	Republic of Korea	1	Male	12	35-39 years	441	Colon and rectum cancer	3	Rate	2021	61.22225079353999	86.9466	40.9661
5	Prevalence	68	Republic of Korea	2	Female	12	35-39 years	441	Colon and rectum cancer	3	Rate	2021	58.3508	84.4695	40.787
5	Prevalence	68	Republic of Korea	1	Male	13	40-44 years	441	Colon and rectum cancer	1	Number	2021	2443.194424241144	3538.661570738974	1600.7222297149085
5	Prevalence	68	Republic of Korea	2	Female	13	40-44 years	441	Colon and rectum cancer	1	Number	2021	1966.0632572673192	2705.513066113623	1380.4776909932357
5	Prevalence	68	Republic of Korea	1	Male	13	40-44 years	441	Colon and rectum cancer	3	Rate	2021	115.99070765594	167.99803391512	75.9943
5	Prevalence	68	Republic of Korea	2	Female	13	40-44 years	441	Colon and rectum cancer	3	Rate	2021	100.35370166816	138.09741374927	70.4637
5	Prevalence	68	Republic of Korea	1	Male	14	45-49 years	441	Colon and rectum cancer	1	Number	2021	4553.600859299211	6372.87937740212	3048.2796169032845
5	Prevalence	68	Republic of Korea	2	Female	14	45-49 years	441	Colon and rectum cancer	1	Number	2021	3338.185459050622	4564.140228152679	2408.605468458819
5	Prevalence	68	Republic of Korea	1	Male	14	45-49 years	441	Colon and rectum cancer	3	Rate	2021	210.83823753900998	295.07343693425	141.13970938877
5	Prevalence	68	Republic of Korea	2	Female	14	45-49 years	441	Colon and rectum cancer	3	Rate	2021	162.08100406284	221.60555185958998	116.94652604175
5	Prevalence	68	Republic of Korea	1	Male	15	50-54 years	441	Colon and rectum cancer	1	Number	2021	8989.553936840975	12265.93004527016	6292.902921528461
5	Prevalence	68	Republic of Korea	2	Female	15	50-54 years	441	Colon and rectum cancer	1	Number	2021	5321.942057135319	7371.22195308216	3821.106150596601
5	Prevalence	68	Republic of Korea	1	Male	15	50-54 years	441	Colon and rectum cancer	3	Rate	2021	397.80449119123	542.79023129824	278.47266531826
5	Prevalence	68	Republic of Korea	2	Female	15	50-54 years	441	Colon and rectum cancer	3	Rate	2021	239.07248323356998	331.13031255694	171.652
5	Prevalence	68	Republic of Korea	1	Male	16	55-59 years	441	Colon and rectum cancer	1	Number	2021	14104.273210598083	19042.70386181938	10138.843615749269
5	Prevalence	68	Republic of Korea	2	Female	16	55-59 years	441	Colon and rectum cancer	1	Number	2021	6512.205883395012	8760.878890768818	4621.461711311023
5	Prevalence	68	Republic of Korea	1	Male	16	55-59 years	441	Colon and rectum cancer	3	Rate	2021	671.04973229214	906.00920286984	482.38347290295
5	Prevalence	68	Republic of Korea	2	Female	16	55-59 years	441	Colon and rectum cancer	3	Rate	2021	315.573	424.54137628859	223.95032962415
5	Prevalence	68	Republic of Korea	1	Male	17	60-64 years	441	Colon and rectum cancer	1	Number	2021	19165.72640564965	25329.58152716179	13885.658717817534
5	Prevalence	68	Republic of Korea	2	Female	17	60-64 years	441	Colon and rectum cancer	1	Number	2021	8362.138633383092	11629.81171618186	5935.192663281972
5	Prevalence	68	Republic of Korea	1	Male	17	60-64 years	441	Colon and rectum cancer	3	Rate	2021	958.6697339937699	1266.98579906993	694.561
5	Prevalence	68	Republic of Korea	2	Female	17	60-64 years	441	Colon and rectum cancer	3	Rate	2021	405.36266784473	563.76624575239	287.71414080074004
5	Prevalence	68	Republic of Korea	1	Male	18	65-69 years	441	Colon and rectum cancer	1	Number	2021	19707.001117710468	26202.10330662757	14325.14882158951
5	Prevalence	68	Republic of Korea	2	Female	18	65-69 years	441	Colon and rectum cancer	1	Number	2021	8236.592808747555	11047.39908497233	5808.740510088834
5	Prevalence	68	Republic of Korea	1	Male	18	65-69 years	441	Colon and rectum cancer	3	Rate	2021	1378.25163731349	1832.5006208561201	1001.86018665071
5	Prevalence	68	Republic of Korea	2	Female	18	65-69 years	441	Colon and rectum cancer	3	Rate	2021	539.67842662838	723.8482094418599	380.60057258724
5	Prevalence	71	Australia	1	Male	19	70-74 years	441	Colon and rectum cancer	1	Number	2021	10945.601949701477	13490.2776890259	8857.741322765025
5	Prevalence	71	Australia	2	Female	19	70-74 years	441	Colon and rectum cancer	1	Number	2021	7653.01199722512	9407.969797473805	6047.721581517469
5	Prevalence	71	Australia	1	Male	19	70-74 years	441	Colon and rectum cancer	3	Rate	2021	1940.0729110300701	2391.10854085702	1570.00629770542
5	Prevalence	71	Australia	2	Female	19	70-74 years	441	Colon and rectum cancer	3	Rate	2021	1273.39000510006	1565.39865777425	1006.28461295038
5	Prevalence	71	Australia	1	Male	20	75-79 years	441	Colon and rectum cancer	1	Number	2021	9817.26664470072	12069.228719743309	7880.690140094362
5	Prevalence	71	Australia	2	Female	20	75-79 years	441	Colon and rectum cancer	1	Number	2021	7669.641867644639	9283.804314562009	6021.880080256766
5	Prevalence	71	Australia	1	Male	20	75-79 years	441	Colon and rectum cancer	3	Rate	2021	2489.54845074506	3060.62071535398	1998.4544210851302
5	Prevalence	71	Australia	2	Female	20	75-79 years	441	Colon and rectum cancer	3	Rate	2021	1784.72254822514	2160.33749416738	1401.28904939894
5	Prevalence	71	Australia	1	Male	30	80-84 years	441	Colon and rectum cancer	1	Number	2021	6571.532462077749	7931.644082330798	5262.782719999865
5	Prevalence	71	Australia	2	Female	30	80-84 years	441	Colon and rectum cancer	1	Number	2021	5999.240542869792	7509.298876338418	4569.126872875956
5	Prevalence	71	Australia	1	Male	30	80-84 years	441	Colon and rectum cancer	3	Rate	2021	2597.19883134866	3134.74168471045	2079.95520206316
5	Prevalence	71	Australia	2	Female	30	80-84 years	441	Colon and rectum cancer	3	Rate	2021	1989.67858602938	2490.49709935415	1515.37412624963
5	Prevalence	71	Australia	1	Male	31	85-89 years	441	Colon and rectum cancer	1	Number	2021	3793.1212893839247	4705.6018430630775	3007.718733236072
5	Prevalence	71	Australia	2	Female	31	85-89 years	441	Colon and rectum cancer	1	Number	2021	4349.487171847701	5639.964666902217	3117.607774536667
5	Prevalence	71	Australia	1	Male	31	85-89 years	441	Colon and rectum cancer	3	Rate	2021	2774.45107940259	3441.87836789307	2199.97407130674
5	Prevalence	71	Australia	2	Female	31	85-89 years	441	Colon and rectum cancer	3	Rate	2021	2287.3878033268397	2966.04769264926	1639.54455255991
5	Prevalence	71	Australia	1	Male	32	90-94 years	441	Colon and rectum cancer	1	Number	2021	1179.4450885154977	1398.4478860353	975.8326351166236
5	Prevalence	71	Australia	2	Female	32	90-94 years	441	Colon and rectum cancer	1	Number	2021	1815.4853217970087	2294.894137353688	1398.8906199881158
5	Prevalence	71	Australia	1	Male	32	90-94 years	441	Colon and rectum cancer	3	Rate	2021	2024.9852831453902	2400.99044545731	1675.40375059875
5	Prevalence	71	Australia	2	Female	32	90-94 years	441	Colon and rectum cancer	3	Rate	2021	1766.7518372715401	2233.2917731882703	1361.3398815913201
5	Prevalence	67	Japan	1	Male	19	70-74 years	441	Colon and rectum cancer	1	Number	2021	131632.71569281054	145117.2784191182	117848.46015681767
5	Prevalence	67	Japan	2	Female	19	70-74 years	441	Colon and rectum cancer	1	Number	2021	68891.17019425746	78557.01610865042	57241.01196847084
5	Prevalence	67	Japan	1	Male	19	70-74 years	441	Colon and rectum cancer	3	Rate	2021	2851.0052042369402	3143.0645020127304	2552.45492315515
5	Prevalence	67	Japan	2	Female	19	70-74 years	441	Colon and rectum cancer	3	Rate	2021	1340.18873833917	1528.22528648408	1113.54995705498
5	Prevalence	67	Japan	1	Male	20	75-79 years	441	Colon and rectum cancer	1	Number	2021	97516.71612625162	109119.81738023274	85941.16277056505
5	Prevalence	67	Japan	2	Female	20	75-79 years	441	Colon and rectum cancer	1	Number	2021	62339.515502836446	72973.04544040347	48931.64198332605
5	Prevalence	67	Japan	1	Male	20	75-79 years	441	Colon and rectum cancer	3	Rate	2021	3195.74098261367	3575.9886742479603	2816.39606899593
5	Prevalence	67	Japan	2	Female	20	75-79 years	441	Colon and rectum cancer	3	Rate	2021	1666.0565031223598	1950.24321135598	1307.72399620376
5	Prevalence	67	Japan	1	Male	30	80-84 years	441	Colon and rectum cancer	1	Number	2021	70763.1434751425	80717.49106353606	59564.75696872637
5	Prevalence	67	Japan	2	Female	30	80-84 years	441	Colon and rectum cancer	1	Number	2021	56255.65135426116	68349.39784209232	41437.453990804905
5	Prevalence	67	Japan	1	Male	30	80-84 years	441	Colon and rectum cancer	3	Rate	2021	3008.7831242760503	3432.0327365217	2532.63813290125
5	Prevalence	67	Japan	2	Female	30	80-84 years	441	Colon and rectum cancer	3	Rate	2021	1728.87105754667	2100.54088585334	1273.47232106482
5	Prevalence	67	Japan	1	Male	31	85-89 years	441	Colon and rectum cancer	1	Number	2021	47081.39744971853	54465.64336832876	39301.94633203712
5	Prevalence	67	Japan	2	Female	31	85-89 years	441	Colon and rectum cancer	1	Number	2021	52938.9076764942	67020.85601526109	36311.90897259296
5	Prevalence	67	Japan	1	Male	31	85-89 years	441	Colon and rectum cancer	3	Rate	2021	3328.30351842273	3850.31460991713	2778.35436803846
5	Prevalence	67	Japan	2	Female	31	85-89 years	441	Colon and rectum cancer	3	Rate	2021	2143.39476621415	2713.54582697759	1470.1995008797398
5	Prevalence	67	Japan	1	Male	32	90-94 years	441	Colon and rectum cancer	1	Number	2021	14475.675606655246	16997.152346170074	12080.860841857031
5	Prevalence	67	Japan	2	Female	32	90-94 years	441	Colon and rectum cancer	1	Number	2021	24285.37935293593	30106.82016123479	16853.237412615465
5	Prevalence	67	Japan	1	Male	32	90-94 years	441	Colon and rectum cancer	3	Rate	2021	2440.81055514873	2865.96839977052	2037.00977138026
5	Prevalence	67	Japan	2	Female	32	90-94 years	441	Colon and rectum cancer	3	Rate	2021	1751.8864770889797	2171.83064518368	1215.7503611226
5	Prevalence	68	Republic of Korea	1	Male	19	70-74 years	441	Colon and rectum cancer	1	Number	2021	18115.294214314486	24298.684458970827	12913.134003816138
5	Prevalence	68	Republic of Korea	2	Female	19	70-74 years	441	Colon and rectum cancer	1	Number	2021	8983.665689706711	12319.806380660448	6267.395221938272
5	Prevalence	68	Republic of Korea	1	Male	19	70-74 years	441	Colon and rectum cancer	3	Rate	2021	1837.7117975423198	2464.98779245461	1309.97699630548
5	Prevalence	68	Republic of Korea	2	Female	19	70-74 years	441	Colon and rectum cancer	3	Rate	2021	807.6392429379899	1107.56114954496	563.44420051595
5	Prevalence	68	Republic of Korea	1	Male	20	75-79 years	441	Colon and rectum cancer	1	Number	2021	17439.682303086534	23208.37178915445	12500.525094327506
5	Prevalence	68	Republic of Korea	2	Female	20	75-79 years	441	Colon and rectum cancer	1	Number	2021	11761.830668199857	16237.902414570131	8063.271016444769
5	Prevalence	68	Republic of Korea	1	Male	20	75-79 years	441	Colon and rectum cancer	3	Rate	2021	2596.17365282637	3454.9346895693097	1860.9016685266201
5	Prevalence	68	Republic of Korea	2	Female	20	75-79 years	441	Colon and rectum cancer	3	Rate	2021	1347.03223895172	1859.65762153975	923.45199628846
5	Prevalence	68	Republic of Korea	1	Male	30	80-84 years	441	Colon and rectum cancer	1	Number	2021	11676.812663297806	15822.805789755272	8225.964771811356
5	Prevalence	68	Republic of Korea	2	Female	30	80-84 years	441	Colon and rectum cancer	1	Number	2021	10944.291584403763	15021.142164258656	7478.611036015067
5	Prevalence	68	Republic of Korea	1	Male	30	80-84 years	441	Colon and rectum cancer	3	Rate	2021	2896.20452310932	3924.5368593270996	2040.2893380263802
5	Prevalence	68	Republic of Korea	2	Female	30	80-84 years	441	Colon and rectum cancer	3	Rate	2021	1618.19279698012	2220.9846900695397	1105.76682068133
5	Prevalence	68	Republic of Korea	1	Male	31	85-89 years	441	Colon and rectum cancer	1	Number	2021	5308.97478073086	7321.774468528668	3746.636611266484
5	Prevalence	68	Republic of Korea	2	Female	31	85-89 years	441	Colon and rectum cancer	1	Number	2021	6757.270315820609	9756.686879171635	4258.206641389488
5	Prevalence	68	Republic of Korea	1	Male	31	85-89 years	441	Colon and rectum cancer	3	Rate	2021	3049.2337639215198	4205.2944011504005	2151.89774449174
5	Prevalence	68	Republic of Korea	2	Female	31	85-89 years	441	Colon and rectum cancer	3	Rate	2021	1707.77311704149	2465.8193005288	1076.18172562176
5	Prevalence	68	Republic of Korea	1	Male	32	90-94 years	441	Colon and rectum cancer	1	Number	2021	936.4548279609644	1238.45703751538	694.2054895322419
5	Prevalence	68	Republic of Korea	2	Female	32	90-94 years	441	Colon and rectum cancer	1	Number	2021	1829.5675939774412	2547.901272965188	1262.620360522756
5	Prevalence	68	Republic of Korea	1	Male	32	90-94 years	441	Colon and rectum cancer	3	Rate	2021	2057.22350477552	2720.66825986561	1525.04510369128
5	Prevalence	68	Republic of Korea	2	Female	32	90-94 years	441	Colon and rectum cancer	3	Rate	2021	1224.0148702055901	1704.59350952168	844.71658865819
6	Incidence	68	Republic of Korea	1	Male	30	80-84 years	441	Colon and rectum cancer	1	Number	2021	2327.706835106784	3183.984378564317	1590.7648066682775
6	Incidence	68	Republic of Korea	2	Female	30	80-84 years	441	Colon and rectum cancer	1	Number	2021	2122.685577218641	2944.311802450684	1394.4221667885447
6	Incidence	68	Republic of Korea	1	Male	30	80-84 years	441	Colon and rectum cancer	3	Rate	2021	577.34205889064	789.7249210558999	394.55803232648003
6	Incidence	68	Republic of Korea	2	Female	30	80-84 years	441	Colon and rectum cancer	3	Rate	2021	313.85444044671	435.33783014141	206.17541929000998
6	Incidence	68	Republic of Korea	1	Male	31	85-89 years	441	Colon and rectum cancer	1	Number	2021	1323.3932079111185	1859.65420366742	888.6411459588021
6	Incidence	68	Republic of Korea	2	Female	31	85-89 years	441	Colon and rectum cancer	1	Number	2021	1671.6914758142218	2517.1165897101446	978.198646399514
6	Incidence	68	Republic of Korea	1	Male	31	85-89 years	441	Colon and rectum cancer	3	Rate	2021	760.09689613772	1068.10083325742	510.39507591981
6	Incidence	68	Republic of Korea	2	Female	31	85-89 years	441	Colon and rectum cancer	3	Rate	2021	422.48861284991	636.1539265791699	247.22132952655
6	Incidence	68	Republic of Korea	1	Male	32	90-94 years	441	Colon and rectum cancer	1	Number	2021	295.91963577614433	430.63385475501104	191.73602712498436
6	Incidence	68	Republic of Korea	2	Female	32	90-94 years	441	Colon and rectum cancer	1	Number	2021	660.7911883753734	987.8718045629736	401.012185175132
6	Incidence	68	Republic of Korea	1	Male	32	90-94 years	441	Colon and rectum cancer	3	Rate	2021	650.08243010379	946.02543710846	421.20970487456003
6	Incidence	68	Republic of Korea	2	Female	32	90-94 years	441	Colon and rectum cancer	3	Rate	2021	442.08163903577	660.9046763957999	268.28463698404
6	Incidence	68	Republic of Korea	1	Male	235	95+ years	441	Colon and rectum cancer	1	Number	2021	62.309054588523054	90.0950356682701	38.22467725771197
6	Incidence	68	Republic of Korea	2	Female	235	95+ years	441	Colon and rectum cancer	1	Number	2021	177.0356356676892	255.54132305783617	106.59701442083258
6	Incidence	68	Republic of Korea	1	Male	235	95+ years	441	Colon and rectum cancer	3	Rate	2021	609.9216807430901	881.90899291099	374.168
6	Incidence	68	Republic of Korea	2	Female	235	95+ years	441	Colon and rectum cancer	3	Rate	2021	414.71478421435	598.6182626457701	249.70880956651
6	Incidence	6	China	1	Male	1	<5 years	441	Colon and rectum cancer	1	Number	2021	0	0	0
6	Incidence	6	China	2	Female	1	<5 years	441	Colon and rectum cancer	1	Number	2021	0	0	0
6	Incidence	6	China	1	Male	1	<5 years	441	Colon and rectum cancer	3	Rate	2021	0	0	0
6	Incidence	6	China	2	Female	1	<5 years	441	Colon and rectum cancer	3	Rate	2021	0	0	0
6	Incidence	6	China	1	Male	6	5-9 years	441	Colon and rectum cancer	1	Number	2021	0	0	0
6	Incidence	6	China	2	Female	6	5-9 years	441	Colon and rectum cancer	1	Number	2021	0	0	0
6	Incidence	6	China	1	Male	6	5-9 years	441	Colon and rectum cancer	3	Rate	2021	0	0	0
6	Incidence	6	China	2	Female	6	5-9 years	441	Colon and rectum cancer	3	Rate	2021	0	0	0
6	Incidence	6	China	1	Male	7	10-14 years	441	Colon and rectum cancer	1	Number	2021	0	0	0
6	Incidence	6	China	2	Female	7	10-14 years	441	Colon and rectum cancer	1	Number	2021	0	0	0
6	Incidence	6	China	1	Male	7	10-14 years	441	Colon and rectum cancer	3	Rate	2021	0	0	0
6	Incidence	6	China	2	Female	7	10-14 years	441	Colon and rectum cancer	3	Rate	2021	0	0	0
6	Incidence	6	China	1	Male	8	15-19 years	441	Colon and rectum cancer	1	Number	2021	378.57884581701353	498.7621205059392	268.0039425079179
6	Incidence	6	China	2	Female	8	15-19 years	441	Colon and rectum cancer	1	Number	2021	184.9118162567501	234.78553893704748	142.9378452830626
6	Incidence	6	China	1	Male	8	15-19 years	441	Colon and rectum cancer	3	Rate	2021	0.9444917343399999	1.2443291679600001	0.668626
6	Incidence	6	China	2	Female	8	15-19 years	441	Colon and rectum cancer	3	Rate	2021	0.534592	0.6787799896400001	0.41324244066000004
6	Incidence	6	China	1	Male	9	20-24 years	441	Colon and rectum cancer	1	Number	2021	843.8230638521533	1104.3211921828934	627.8220470408905
6	Incidence	6	China	2	Female	9	20-24 years	441	Colon and rectum cancer	1	Number	2021	389.6091022969471	522.0341689436677	277.9996863984551
6	Incidence	6	China	1	Male	9	20-24 years	441	Colon and rectum cancer	3	Rate	2021	2.17102	2.84125	1.61529
6	Incidence	6	China	2	Female	9	20-24 years	441	Colon and rectum cancer	3	Rate	2021	1.13567	1.52167	0.810338
6	Incidence	6	China	1	Male	10	25-29 years	441	Colon and rectum cancer	1	Number	2021	2311.669444487004	2901.867926796561	1779.2432178900222
6	Incidence	6	China	2	Female	10	25-29 years	441	Colon and rectum cancer	1	Number	2021	961.3623013227656	1322.6510749537883	668.6180720595457
6	Incidence	6	China	1	Male	10	25-29 years	441	Colon and rectum cancer	3	Rate	2021	5.0677	6.36155	3.9005031061200004
6	Incidence	6	China	2	Female	10	25-29 years	441	Colon and rectum cancer	3	Rate	2021	2.35246	3.23653	1.63611
6	Incidence	6	China	1	Male	11	30-34 years	441	Colon and rectum cancer	1	Number	2021	7156.320205932432	8961.37322325848	5544.94136124915
6	Incidence	6	China	2	Female	11	30-34 years	441	Colon and rectum cancer	1	Number	2021	2666.6954033765314	3615.81731354138	1876.4431641689207
6	Incidence	6	China	1	Male	11	30-34 years	441	Colon and rectum cancer	3	Rate	2021	11.4165	14.2962	8.84589
6	Incidence	6	China	2	Female	11	30-34 years	441	Colon and rectum cancer	3	Rate	2021	4.56083	6.18411	3.20927
6	Incidence	6	China	1	Male	12	35-39 years	441	Colon and rectum cancer	1	Number	2021	9905.995541726235	12737.38108689934	7494.930270231385
6	Incidence	6	China	2	Female	12	35-39 years	441	Colon and rectum cancer	1	Number	2021	3716.580239664343	4999.1279159323	2669.5446368582043
6	Incidence	6	China	1	Male	12	35-39 years	441	Colon and rectum cancer	3	Rate	2021	18.2209	23.4289	13.786
6	Incidence	6	China	2	Female	12	35-39 years	441	Colon and rectum cancer	3	Rate	2021	7.2030727500600005	9.688767561379999	5.17382
6	Incidence	6	China	1	Male	13	40-44 years	441	Colon and rectum cancer	1	Number	2021	13508.657720153573	17834.018472489202	10083.921710599468
6	Incidence	6	China	2	Female	13	40-44 years	441	Colon and rectum cancer	1	Number	2021	5498.679246956695	7401.324107253891	3993.8675417094655
6	Incidence	6	China	1	Male	13	40-44 years	441	Colon and rectum cancer	3	Rate	2021	28.7876	38.005118498520005	21.4893
6	Incidence	6	China	2	Female	13	40-44 years	441	Colon and rectum cancer	3	Rate	2021	12.3266	16.5918	8.953178167519999
6	Incidence	6	China	1	Male	14	45-49 years	441	Colon and rectum cancer	1	Number	2021	21820.506740459085	29644.72425868322	15794.4750897348
6	Incidence	6	China	2	Female	14	45-49 years	441	Colon and rectum cancer	1	Number	2021	9348.882645080188	12695.302387368984	6778.460628775627
6	Incidence	6	China	1	Male	14	45-49 years	441	Colon and rectum cancer	3	Rate	2021	38.922458283960005	52.879	28.1735
6	Incidence	6	China	2	Female	14	45-49 years	441	Colon and rectum cancer	3	Rate	2021	17.2298	23.3971	12.4925
6	Incidence	6	China	1	Male	15	50-54 years	441	Colon and rectum cancer	1	Number	2021	38139.45099652689	52093.77232982138	27849.069411685272
6	Incidence	6	China	2	Female	15	50-54 years	441	Colon and rectum cancer	1	Number	2021	18545.181111017144	24619.2734829778	13345.391738055672
6	Incidence	6	China	1	Male	15	50-54 years	441	Colon and rectum cancer	3	Rate	2021	62.3795	85.20263200587999	45.5489
6	Incidence	6	China	2	Female	15	50-54 years	441	Colon and rectum cancer	3	Rate	2021	31.0546	41.2259	22.3474
6	Incidence	6	China	1	Male	16	55-59 years	441	Colon and rectum cancer	1	Number	2021	48876.98862601783	66699.18055536579	35755.37939615021
6	Incidence	6	China	2	Female	16	55-59 years	441	Colon and rectum cancer	1	Number	2021	25303.026594918865	33641.688873972154	18949.037055343724
6	Incidence	6	China	1	Male	16	55-59 years	441	Colon and rectum cancer	3	Rate	2021	89.0558	121.52852214673	65.14770317458999
6	Incidence	6	China	2	Female	16	55-59 years	441	Colon and rectum cancer	3	Rate	2021	45.9564	61.1014	34.416
6	Incidence	6	China	1	Male	17	60-64 years	441	Colon and rectum cancer	1	Number	2021	46619.08494990235	62018.56135469884	34947.13709536144
6	Incidence	6	China	2	Female	17	60-64 years	441	Colon and rectum cancer	1	Number	2021	25510.71950903096	33491.43714984295	19100.067674917627
6	Incidence	6	China	1	Male	17	60-64 years	441	Colon and rectum cancer	3	Rate	2021	127.28639615683	169.33234914744	95.41789894947999
6	Incidence	6	China	2	Female	17	60-64 years	441	Colon and rectum cancer	3	Rate	2021	70.12327264009001	92.0605	52.501821931689996
6	Incidence	6	China	1	Male	18	65-69 years	441	Colon and rectum cancer	1	Number	2021	65457.87147995801	87085.93402230326	48614.03998100069
6	Incidence	6	China	2	Female	18	65-69 years	441	Colon and rectum cancer	1	Number	2021	38829.24281519058	50445.501319326606	29262.891873060384
6	Incidence	6	China	1	Male	18	65-69 years	441	Colon and rectum cancer	3	Rate	2021	173.44389008093	230.75182291535998	128.81274652257
6	Incidence	6	China	2	Female	18	65-69 years	441	Colon and rectum cancer	3	Rate	2021	99.6556	129.46885107876	75.1035
6	Incidence	6	China	1	Male	19	70-74 years	441	Colon and rectum cancer	1	Number	2021	63835.44834721567	83589.33038325724	48315.56957420327
6	Incidence	6	China	2	Female	19	70-74 years	441	Colon and rectum cancer	1	Number	2021	39966.065171486494	50377.22486901967	30488.4434287784
6	Incidence	6	China	1	Male	19	70-74 years	441	Colon and rectum cancer	3	Rate	2021	246.88363681616	323.28178807168996	186.86049585556998
6	Incidence	6	China	2	Female	19	70-74 years	441	Colon and rectum cancer	3	Rate	2021	145.64919114505	183.59080441924	111.10969032400999
6	Incidence	6	China	1	Male	20	75-79 years	441	Colon and rectum cancer	1	Number	2021	48403.81046341233	62169.5221164905	37088.9572889428
6	Incidence	6	China	2	Female	20	75-79 years	441	Colon and rectum cancer	1	Number	2021	30686.36166164021	39303.33943168145	22963.204254980563
6	Incidence	6	China	1	Male	20	75-79 years	441	Colon and rectum cancer	3	Rate	2021	310.23249142506	398.46048383903	237.71268240965
6	Incidence	6	China	2	Female	20	75-79 years	441	Colon and rectum cancer	3	Rate	2021	175.18540415476	224.37887811177	131.09466226248
6	Incidence	6	China	1	Male	30	80-84 years	441	Colon and rectum cancer	1	Number	2021	29786.958929852564	37038.03091115087	23456.224417379824
6	Incidence	6	China	2	Female	30	80-84 years	441	Colon and rectum cancer	1	Number	2021	20981.25337840958	26496.4799726533	15524.28013107858
6	Incidence	6	China	1	Male	30	80-84 years	441	Colon and rectum cancer	3	Rate	2021	343.36650329258	426.95258662538004	270.38952776646
6	Incidence	6	China	2	Female	30	80-84 years	441	Colon and rectum cancer	3	Rate	2021	188.73327681726	238.34455450158	139.64600715334
6	Incidence	6	China	1	Male	31	85-89 years	441	Colon and rectum cancer	1	Number	2021	17772.75406803327	21585.39664983516	14333.175694387328
6	Incidence	6	China	2	Female	31	85-89 years	441	Colon and rectum cancer	1	Number	2021	12193.92703435164	15894.20639423038	8559.984151253262
6	Incidence	6	China	1	Male	31	85-89 years	441	Colon and rectum cancer	3	Rate	2021	510.57702610280006	620.10691120432	411.76455785274
6	Incidence	6	China	2	Female	31	85-89 years	441	Colon and rectum cancer	3	Rate	2021	201.72470599725	262.93860073981	141.60821869675
6	Incidence	6	China	1	Male	32	90-94 years	441	Colon and rectum cancer	1	Number	2021	3812.18229282473	4786.663145697528	2973.0217259714377
6	Incidence	6	China	2	Female	32	90-94 years	441	Colon and rectum cancer	1	Number	2021	3679.698373642897	4672.942528452631	2610.271802800051
6	Incidence	6	China	1	Male	32	90-94 years	441	Colon and rectum cancer	3	Rate	2021	471.31786046327	591.797	367.56852935209
6	Incidence	6	China	2	Female	32	90-94 years	441	Colon and rectum cancer	3	Rate	2021	173.31293073946	220.09449757737	122.943
6	Incidence	6	China	1	Male	235	95+ years	441	Colon and rectum cancer	1	Number	2021	382.386672276244	461.4059276273234	297.34197624236765
6	Incidence	6	China	2	Female	235	95+ years	441	Colon and rectum cancer	1	Number	2021	846.6755937590428	1107.529186441911	574.8543475375266
6	Incidence	6	China	1	Male	235	95+ years	441	Colon and rectum cancer	3	Rate	2021	316.16919046411005	381.505	245.85159142689
6	Incidence	6	China	2	Female	235	95+ years	441	Colon and rectum cancer	3	Rate	2021	163.40206635979	213.74486161212002	110.94259588432999
6	Incidence	71	Australia	1	Male	30	80-84 years	441	Colon and rectum cancer	1	Number	2021	1232.7278064329992	1500.257385558033	971.2013859809724
6	Incidence	71	Australia	2	Female	30	80-84 years	441	Colon and rectum cancer	1	Number	2021	1070.1174029296226	1354.043396430961	784.3713986972427
6	Incidence	71	Australia	1	Male	30	80-84 years	441	Colon and rectum cancer	3	Rate	2021	487.19826565788003	592.93121520418	383.83788244674
6	Incidence	71	Australia	2	Female	30	80-84 years	441	Colon and rectum cancer	3	Rate	2021	354.90986999628996	449.07536732048004	260.14075687241
6	Incidence	71	Australia	1	Male	31	85-89 years	441	Colon and rectum cancer	1	Number	2021	869.2344713137775	1095.325764296046	673.2680798998399
6	Incidence	71	Australia	2	Female	31	85-89 years	441	Colon and rectum cancer	1	Number	2021	943.03837537636	1236.8147645095842	656.8779095526851
6	Incidence	71	Australia	1	Male	31	85-89 years	441	Colon and rectum cancer	3	Rate	2021	635.795	801.16809276674	492.45705805226004
6	Incidence	71	Australia	2	Female	31	85-89 years	441	Colon and rectum cancer	3	Rate	2021	495.94225541506	650.43875186599	345.45095989955996
6	Incidence	71	Australia	1	Male	32	90-94 years	441	Colon and rectum cancer	1	Number	2021	331.7019781148993	408.7722125993072	256.7859147700204
6	Incidence	71	Australia	2	Female	32	90-94 years	441	Colon and rectum cancer	1	Number	2021	544.1205394545237	704.3044697814553	386.7849621032402
6	Incidence	71	Australia	1	Male	32	90-94 years	441	Colon and rectum cancer	3	Rate	2021	569.49800428462	701.8196291903901	440.87486852210003
6	Incidence	71	Australia	2	Female	32	90-94 years	441	Colon and rectum cancer	3	Rate	2021	529.51458832337	685.3986650540801	376.40240558293
6	Incidence	67	Japan	1	Male	30	80-84 years	441	Colon and rectum cancer	1	Number	2021	12887.957945778027	14703.143619482678	10889.404130353432
6	Incidence	67	Japan	2	Female	30	80-84 years	441	Colon and rectum cancer	1	Number	2021	9910.332836809916	12177.920324521718	6899.17675569208
6	Incidence	67	Japan	1	Male	30	80-84 years	441	Colon and rectum cancer	3	Rate	2021	547.98399942843	625.16400803543	463.00734777757003
6	Incidence	67	Japan	2	Female	30	80-84 years	441	Colon and rectum cancer	3	Rate	2021	304.56829135828997	374.25669214263	212.02824474827
6	Incidence	67	Japan	1	Male	31	85-89 years	441	Colon and rectum cancer	1	Number	2021	10499.510689762585	11944.20111652608	8732.005984942276
6	Incidence	67	Japan	2	Female	31	85-89 years	441	Colon and rectum cancer	1	Number	2021	11644.906476431364	14920.623678000027	7517.273175742765
6	Incidence	67	Japan	1	Male	31	85-89 years	441	Colon and rectum cancer	3	Rate	2021	742.23706736348	844.36590148664	617.288
6	Incidence	67	Japan	2	Female	31	85-89 years	441	Colon and rectum cancer	3	Rate	2021	471.47991317015	604.10741558002	304.35996298887
6	Incidence	67	Japan	1	Male	32	90-94 years	441	Colon and rectum cancer	1	Number	2021	4117.718807445842	4690.452487972129	3273.7921504441083
6	Incidence	67	Japan	2	Female	32	90-94 years	441	Colon and rectum cancer	1	Number	2021	7995.674615038139	10005.929966370008	5256.44368563786
6	Incidence	67	Japan	1	Male	32	90-94 years	441	Colon and rectum cancer	3	Rate	2021	694.3075958214599	790.8788682583099	552.00922245682
6	Incidence	67	Japan	2	Female	32	90-94 years	441	Colon and rectum cancer	3	Rate	2021	576.78795252566	721.80274164273	379.18668992647997
6	Incidence	68	Republic of Korea	1	Male	1	<5 years	441	Colon and rectum cancer	1	Number	2021	0	0	0
6	Incidence	68	Republic of Korea	2	Female	1	<5 years	441	Colon and rectum cancer	1	Number	2021	0	0	0
6	Incidence	68	Republic of Korea	1	Male	1	<5 years	441	Colon and rectum cancer	3	Rate	2021	0	0	0
6	Incidence	68	Republic of Korea	2	Female	1	<5 years	441	Colon and rectum cancer	3	Rate	2021	0	0	0
6	Incidence	68	Republic of Korea	1	Male	6	5-9 years	441	Colon and rectum cancer	1	Number	2021	0	0	0
6	Incidence	68	Republic of Korea	2	Female	6	5-9 years	441	Colon and rectum cancer	1	Number	2021	0	0	0
6	Incidence	68	Republic of Korea	1	Male	6	5-9 years	441	Colon and rectum cancer	3	Rate	2021	0	0	0
6	Incidence	68	Republic of Korea	2	Female	6	5-9 years	441	Colon and rectum cancer	3	Rate	2021	0	0	0
6	Incidence	68	Republic of Korea	1	Male	7	10-14 years	441	Colon and rectum cancer	1	Number	2021	0	0	0
6	Incidence	68	Republic of Korea	2	Female	7	10-14 years	441	Colon and rectum cancer	1	Number	2021	0	0	0
6	Incidence	68	Republic of Korea	1	Male	7	10-14 years	441	Colon and rectum cancer	3	Rate	2021	0	0	0
6	Incidence	68	Republic of Korea	2	Female	7	10-14 years	441	Colon and rectum cancer	3	Rate	2021	0	0	0
6	Incidence	68	Republic of Korea	1	Male	8	15-19 years	441	Colon and rectum cancer	1	Number	2021	4.724917896667577	7.431206935608362	2.83969943678361
6	Incidence	68	Republic of Korea	2	Female	8	15-19 years	441	Colon and rectum cancer	1	Number	2021	3.796464668850804	5.8216111186620765	2.4434930561154733
6	Incidence	68	Republic of Korea	1	Male	8	15-19 years	441	Colon and rectum cancer	3	Rate	2021	0.39602	0.622848	0.23801
6	Incidence	68	Republic of Korea	2	Female	8	15-19 years	441	Colon and rectum cancer	3	Rate	2021	0.34028728133999997	0.5218065735899999	0.219017
6	Incidence	68	Republic of Korea	1	Male	9	20-24 years	441	Colon and rectum cancer	1	Number	2021	11.917223734767	18.529003783375806	7.592755835481585
6	Incidence	68	Republic of Korea	2	Female	9	20-24 years	441	Colon and rectum cancer	1	Number	2021	11.521129341721547	18.153757468319583	7.394294317605774
6	Incidence	68	Republic of Korea	1	Male	9	20-24 years	441	Colon and rectum cancer	3	Rate	2021	0.745095	1.15848	0.474718
6	Incidence	68	Republic of Korea	2	Female	9	20-24 years	441	Colon and rectum cancer	3	Rate	2021	0.7780949054899999	1.22604	0.499384
6	Incidence	68	Republic of Korea	1	Male	10	25-29 years	441	Colon and rectum cancer	1	Number	2021	41.37810202067863	62.766115225296254	26.469461814010263
6	Incidence	68	Republic of Korea	2	Female	10	25-29 years	441	Colon and rectum cancer	1	Number	2021	31.09867150445069	47.5144468971124	20.473965906052413
6	Incidence	68	Republic of Korea	1	Male	10	25-29 years	441	Colon and rectum cancer	3	Rate	2021	2.1854272353299997	3.31506	1.3980119901099999
6	Incidence	68	Republic of Korea	2	Female	10	25-29 years	441	Colon and rectum cancer	3	Rate	2021	1.85436	2.83321	1.22083
6	Incidence	68	Republic of Korea	1	Male	11	30-34 years	441	Colon and rectum cancer	1	Number	2021	83.34587716351471	122.19309523083469	54.50183070492152
6	Incidence	68	Republic of Korea	2	Female	11	30-34 years	441	Colon and rectum cancer	1	Number	2021	62.92106549953338	94.08176366056406	42.99356058912072
6	Incidence	68	Republic of Korea	1	Male	11	30-34 years	441	Colon and rectum cancer	3	Rate	2021	4.60678	6.753978050730001	3.01248
6	Incidence	68	Republic of Korea	2	Female	11	30-34 years	441	Colon and rectum cancer	3	Rate	2021	4.00548	5.9891289287200005	2.73692
6	Incidence	71	Australia	1	Male	235	95+ years	441	Colon and rectum cancer	1	Number	2021	82.22104181911541	103.8916314414086	61.847513995308944
6	Incidence	71	Australia	2	Female	235	95+ years	441	Colon and rectum cancer	1	Number	2021	173.97390831641124	221.10135376778143	120.23771878381731
6	Incidence	71	Australia	1	Male	235	95+ years	441	Colon and rectum cancer	3	Rate	2021	534.86456956333	675.83615462316	402.33063483236
6	Incidence	71	Australia	2	Female	235	95+ years	441	Colon and rectum cancer	3	Rate	2021	471.64863484604996	599.41259397086	325.96816654973003
6	Incidence	67	Japan	1	Male	1	<5 years	441	Colon and rectum cancer	1	Number	2021	0	0	0
6	Incidence	67	Japan	2	Female	1	<5 years	441	Colon and rectum cancer	1	Number	2021	0	0	0
6	Incidence	67	Japan	1	Male	1	<5 years	441	Colon and rectum cancer	3	Rate	2021	0	0	0
6	Incidence	67	Japan	2	Female	1	<5 years	441	Colon and rectum cancer	3	Rate	2021	0	0	0
6	Incidence	67	Japan	1	Male	6	5-9 years	441	Colon and rectum cancer	1	Number	2021	0	0	0
6	Incidence	67	Japan	2	Female	6	5-9 years	441	Colon and rectum cancer	1	Number	2021	0	0	0
6	Incidence	67	Japan	1	Male	6	5-9 years	441	Colon and rectum cancer	3	Rate	2021	0	0	0
6	Incidence	67	Japan	2	Female	6	5-9 years	441	Colon and rectum cancer	3	Rate	2021	0	0	0
6	Incidence	67	Japan	1	Male	7	10-14 years	441	Colon and rectum cancer	1	Number	2021	0	0	0
6	Incidence	67	Japan	2	Female	7	10-14 years	441	Colon and rectum cancer	1	Number	2021	0	0	0
6	Incidence	67	Japan	1	Male	7	10-14 years	441	Colon and rectum cancer	3	Rate	2021	0	0	0
6	Incidence	67	Japan	2	Female	7	10-14 years	441	Colon and rectum cancer	3	Rate	2021	0	0	0
6	Incidence	67	Japan	1	Male	8	15-19 years	441	Colon and rectum cancer	1	Number	2021	13.758315675128085	15.826809961667095	11.679828093877122
6	Incidence	67	Japan	2	Female	8	15-19 years	441	Colon and rectum cancer	1	Number	2021	11.886519056606144	14.057663738453558	9.943757415130744
6	Incidence	67	Japan	1	Male	8	15-19 years	441	Colon and rectum cancer	3	Rate	2021	0.46219185855999995	0.53168	0.39236790185000003
6	Incidence	67	Japan	2	Female	8	15-19 years	441	Colon and rectum cancer	3	Rate	2021	0.422692	0.49989917758999997	0.353606
6	Incidence	67	Japan	1	Male	9	20-24 years	441	Colon and rectum cancer	1	Number	2021	35.95820163315328	41.71223022698693	30.997801779104613
6	Incidence	67	Japan	2	Female	9	20-24 years	441	Colon and rectum cancer	1	Number	2021	26.96138166048787	31.7613277465248	22.416752800595237
6	Incidence	67	Japan	1	Male	9	20-24 years	441	Colon and rectum cancer	3	Rate	2021	1.1390001408400001	1.32126	0.981876
6	Incidence	67	Japan	2	Female	9	20-24 years	441	Colon and rectum cancer	3	Rate	2021	0.890351	1.04886	0.740273
6	Incidence	67	Japan	1	Male	10	25-29 years	441	Colon and rectum cancer	1	Number	2021	72.73793085749223	84.6755738701751	62.66315836345234
6	Incidence	67	Japan	2	Female	10	25-29 years	441	Colon and rectum cancer	1	Number	2021	63.95626836091137	75.61954014929486	53.44600712997585
6	Incidence	67	Japan	1	Male	10	25-29 years	441	Colon and rectum cancer	3	Rate	2021	2.25466	2.62469	1.94237
6	Incidence	67	Japan	2	Female	10	25-29 years	441	Colon and rectum cancer	3	Rate	2021	2.07638	2.45503	1.73516
6	Incidence	67	Japan	1	Male	11	30-34 years	441	Colon and rectum cancer	1	Number	2021	175.63659808389738	203.9108724288876	150.13270020850493
6	Incidence	67	Japan	2	Female	11	30-34 years	441	Colon and rectum cancer	1	Number	2021	149.72815007883383	176.73053927387815	125.87799693098977
6	Incidence	67	Japan	1	Male	11	30-34 years	441	Colon and rectum cancer	3	Rate	2021	5.194088128620001	6.03024	4.43986
6	Incidence	67	Japan	2	Female	11	30-34 years	441	Colon and rectum cancer	3	Rate	2021	4.61844	5.45134	3.88277
6	Incidence	71	Australia	1	Male	1	<5 years	441	Colon and rectum cancer	1	Number	2021	0	0	0
6	Incidence	71	Australia	2	Female	1	<5 years	441	Colon and rectum cancer	1	Number	2021	0	0	0
6	Incidence	71	Australia	1	Male	1	<5 years	441	Colon and rectum cancer	3	Rate	2021	0	0	0
6	Incidence	71	Australia	2	Female	1	<5 years	441	Colon and rectum cancer	3	Rate	2021	0	0	0
6	Incidence	71	Australia	1	Male	6	5-9 years	441	Colon and rectum cancer	1	Number	2021	0	0	0
6	Incidence	71	Australia	2	Female	6	5-9 years	441	Colon and rectum cancer	1	Number	2021	0	0	0
6	Incidence	71	Australia	1	Male	6	5-9 years	441	Colon and rectum cancer	3	Rate	2021	0	0	0
6	Incidence	71	Australia	2	Female	6	5-9 years	441	Colon and rectum cancer	3	Rate	2021	0	0	0
6	Incidence	71	Australia	1	Male	7	10-14 years	441	Colon and rectum cancer	1	Number	2021	0	0	0
6	Incidence	71	Australia	2	Female	7	10-14 years	441	Colon and rectum cancer	1	Number	2021	0	0	0
6	Incidence	71	Australia	1	Male	7	10-14 years	441	Colon and rectum cancer	3	Rate	2021	0	0	0
6	Incidence	71	Australia	2	Female	7	10-14 years	441	Colon and rectum cancer	3	Rate	2021	0	0	0
6	Incidence	71	Australia	1	Male	8	15-19 years	441	Colon and rectum cancer	1	Number	2021	2.8030249649722925	3.690146461849815	2.0589150519043398
6	Incidence	71	Australia	2	Female	8	15-19 years	441	Colon and rectum cancer	1	Number	2021	2.362065097966009	2.9934150799909425	1.841332728079285
6	Incidence	71	Australia	1	Male	8	15-19 years	441	Colon and rectum cancer	3	Rate	2021	0.366133	0.48200877251999996	0.268937
6	Incidence	71	Australia	2	Female	8	15-19 years	441	Colon and rectum cancer	3	Rate	2021	0.326568	0.413855	0.254574
6	Incidence	71	Australia	1	Male	9	20-24 years	441	Colon and rectum cancer	1	Number	2021	7.3762448305418	9.49959206821702	5.612540352698872
6	Incidence	71	Australia	2	Female	9	20-24 years	441	Colon and rectum cancer	1	Number	2021	7.521258811688548	9.98229974272883	5.524870383001652
6	Incidence	71	Australia	1	Male	9	20-24 years	441	Colon and rectum cancer	3	Rate	2021	0.895004	1.1526426136499999	0.681003
6	Incidence	71	Australia	2	Female	9	20-24 years	441	Colon and rectum cancer	3	Rate	2021	0.953759	1.26584	0.7006
6	Incidence	71	Australia	1	Male	10	25-29 years	441	Colon and rectum cancer	1	Number	2021	28.338495218667017	37.482141375654464	20.33198520233368
6	Incidence	71	Australia	2	Female	10	25-29 years	441	Colon and rectum cancer	1	Number	2021	28.982502640065476	37.33467893253832	21.548358685334826
6	Incidence	71	Australia	1	Male	10	25-29 years	441	Colon and rectum cancer	3	Rate	2021	3.13195	4.1425	2.24708
6	Incidence	71	Australia	2	Female	10	25-29 years	441	Colon and rectum cancer	3	Rate	2021	3.21545	4.14208	2.39067
6	Incidence	71	Australia	1	Male	11	30-34 years	441	Colon and rectum cancer	1	Number	2021	74.14814069424622	94.79932757623106	57.45644783082734
6	Incidence	71	Australia	2	Female	11	30-34 years	441	Colon and rectum cancer	1	Number	2021	62.881277218281234	81.14723099046775	47.45947562228395
6	Incidence	71	Australia	1	Male	11	30-34 years	441	Colon and rectum cancer	3	Rate	2021	8.03707	10.2755	6.22782
6	Incidence	71	Australia	2	Female	11	30-34 years	441	Colon and rectum cancer	3	Rate	2021	6.51545	8.40808	4.91752
6	Incidence	67	Japan	1	Male	235	95+ years	441	Colon and rectum cancer	1	Number	2021	1124.448693721556	1311.9426179960412	814.6753306888783
6	Incidence	67	Japan	2	Female	235	95+ years	441	Colon and rectum cancer	1	Number	2021	3845.226020308946	4773.492470084666	2382.798913791461
6	Incidence	67	Japan	1	Male	235	95+ years	441	Colon and rectum cancer	3	Rate	2021	497.67353368124003	580.65710096933	360.56989784477
6	Incidence	67	Japan	2	Female	235	95+ years	441	Colon and rectum cancer	3	Rate	2021	586.16335696876	727.668	363.23207086207
6	Incidence	68	Republic of Korea	1	Male	12	35-39 years	441	Colon and rectum cancer	1	Number	2021	163.0708015595939	232.5792526286165	107.67500380705066
6	Incidence	68	Republic of Korea	2	Female	12	35-39 years	441	Colon and rectum cancer	1	Number	2021	141.9784089483509	207.742494996254	98.58537072459951
6	Incidence	68	Republic of Korea	1	Male	12	35-39 years	441	Colon and rectum cancer	3	Rate	2021	8.43884	12.035865103419999	5.57213
6	Incidence	68	Republic of Korea	2	Female	12	35-39 years	441	Colon and rectum cancer	3	Rate	2021	8.207996926509999	12.0099	5.69938
6	Incidence	68	Republic of Korea	1	Male	13	40-44 years	441	Colon and rectum cancer	1	Number	2021	336.4909409233457	503.1362655616517	214.755232658649
6	Incidence	68	Republic of Korea	2	Female	13	40-44 years	441	Colon and rectum cancer	1	Number	2021	273.0061643724177	379.3739182131478	188.40256996114292
6	Incidence	68	Republic of Korea	1	Male	13	40-44 years	441	Colon and rectum cancer	3	Rate	2021	15.9749	23.8864	10.195509273319999
6	Incidence	68	Republic of Korea	2	Female	13	40-44 years	441	Colon and rectum cancer	3	Rate	2021	13.935	19.3644	9.616626133219999
6	Incidence	68	Republic of Korea	1	Male	14	45-49 years	441	Colon and rectum cancer	1	Number	2021	634.73651537696	897.0102601325179	421.1867788571507
6	Incidence	68	Republic of Korea	2	Female	14	45-49 years	441	Colon and rectum cancer	1	Number	2021	470.2575020119372	647.4100760619569	335.72143317142707
6	Incidence	68	Republic of Korea	1	Male	14	45-49 years	441	Colon and rectum cancer	3	Rate	2021	29.389209186050003	41.5329	19.5016
6	Incidence	68	Republic of Korea	2	Female	14	45-49 years	441	Colon and rectum cancer	3	Rate	2021	22.8327	31.4341	16.3005
6	Incidence	68	Republic of Korea	1	Male	15	50-54 years	441	Colon and rectum cancer	1	Number	2021	1279.3788682599857	1761.109984372612	887.0042764047297
6	Incidence	68	Republic of Korea	2	Female	15	50-54 years	441	Colon and rectum cancer	1	Number	2021	749.8414714003883	1044.51277594852	525.3287129006869
6	Incidence	68	Republic of Korea	1	Male	15	50-54 years	441	Colon and rectum cancer	3	Rate	2021	56.61489583405999	77.9324	39.2516
6	Incidence	68	Republic of Korea	2	Female	15	50-54 years	441	Colon and rectum cancer	3	Rate	2021	33.6844	46.921642594809995	23.5988
6	Incidence	68	Republic of Korea	1	Male	16	55-59 years	441	Colon and rectum cancer	1	Number	2021	2031.9872291999363	2767.9871030161003	1452.187500014457
6	Incidence	68	Republic of Korea	2	Female	16	55-59 years	441	Colon and rectum cancer	1	Number	2021	914.975239770988	1241.4002571719484	641.3289882242474
6	Incidence	68	Republic of Korea	1	Male	16	55-59 years	441	Colon and rectum cancer	3	Rate	2021	96.6774	131.69462734679	69.0918
6	Incidence	68	Republic of Korea	2	Female	16	55-59 years	441	Colon and rectum cancer	3	Rate	2021	44.3386	60.1567	31.078
6	Incidence	68	Republic of Korea	1	Male	17	60-64 years	441	Colon and rectum cancer	1	Number	2021	2814.837252547187	3757.6247328762383	2058.4104250456708
6	Incidence	68	Republic of Korea	2	Female	17	60-64 years	441	Colon and rectum cancer	1	Number	2021	1183.6677758146575	1666.7117983687658	815.8650379081922
6	Incidence	68	Republic of Korea	1	Male	17	60-64 years	441	Colon and rectum cancer	3	Rate	2021	140.79817393927001	187.95640858427998	102.96170011311
6	Incidence	68	Republic of Korea	2	Female	17	60-64 years	441	Colon and rectum cancer	3	Rate	2021	57.3794	80.7954	39.5498
6	Incidence	68	Republic of Korea	1	Male	18	65-69 years	441	Colon and rectum cancer	1	Number	2021	2968.0402584419685	4000.788175964005	2114.242392490437
6	Incidence	68	Republic of Korea	2	Female	18	65-69 years	441	Colon and rectum cancer	1	Number	2021	1187.377810596137	1614.965568775814	811.3208984960114
6	Incidence	68	Republic of Korea	1	Male	18	65-69 years	441	Colon and rectum cancer	3	Rate	2021	207.57629846246	279.80375203365	147.86410279890998
6	Incidence	68	Republic of Korea	2	Female	18	65-69 years	441	Colon and rectum cancer	3	Rate	2021	77.7994	105.81585097787999	53.1594
6	Incidence	68	Republic of Korea	1	Male	19	70-74 years	441	Colon and rectum cancer	1	Number	2021	2837.677111154837	3808.145069946852	2011.7973134446356
6	Incidence	68	Republic of Korea	2	Female	19	70-74 years	441	Colon and rectum cancer	1	Number	2021	1350.7103037193936	1881.4677625331103	911.6616123676062
6	Incidence	68	Republic of Korea	1	Male	19	70-74 years	441	Colon and rectum cancer	3	Rate	2021	287.86905932029003	386.31849082881	204.08741991392003
6	Incidence	68	Republic of Korea	2	Female	19	70-74 years	441	Colon and rectum cancer	3	Rate	2021	121.43001362732998	169.14556394118	81.9592
6	Incidence	68	Republic of Korea	1	Male	20	75-79 years	441	Colon and rectum cancer	1	Number	2021	2975.4679444171784	4016.011508053195	2113.3046713019007
6	Incidence	68	Republic of Korea	2	Female	20	75-79 years	441	Colon and rectum cancer	1	Number	2021	1938.9726519402025	2682.0894812422825	1331.2031090015134
6	Incidence	68	Republic of Korea	1	Male	20	75-79 years	441	Colon and rectum cancer	3	Rate	2021	442.94565393305004	597.84708720352	314.59895958413
6	Incidence	68	Republic of Korea	2	Female	20	75-79 years	441	Colon and rectum cancer	3	Rate	2021	222.062	307.168	152.45700733185
6	Incidence	67	Japan	1	Male	12	35-39 years	441	Colon and rectum cancer	1	Number	2021	404.98514008425445	464.4714541944598	352.47459328528373
6	Incidence	67	Japan	2	Female	12	35-39 years	441	Colon and rectum cancer	1	Number	2021	326.56287747987784	383.7267584712082	272.7615948836973
6	Incidence	67	Japan	1	Male	12	35-39 years	441	Colon and rectum cancer	3	Rate	2021	10.6185	12.1782	9.241730563820001
6	Incidence	67	Japan	2	Female	12	35-39 years	441	Colon and rectum cancer	3	Rate	2021	8.84412	10.3923	7.38705
6	Incidence	67	Japan	1	Male	13	40-44 years	441	Colon and rectum cancer	1	Number	2021	890.9962886705908	1017.4663989264184	757.944740862777
6	Incidence	67	Japan	2	Female	13	40-44 years	441	Colon and rectum cancer	1	Number	2021	701.2884020822854	829.9171310979643	596.311423638487
6	Incidence	67	Japan	1	Male	13	40-44 years	441	Colon and rectum cancer	3	Rate	2021	21.0217	24.0056	17.8825
6	Incidence	67	Japan	2	Female	13	40-44 years	441	Colon and rectum cancer	3	Rate	2021	17.039	20.1643	14.4884
6	Incidence	67	Japan	1	Male	14	45-49 years	441	Colon and rectum cancer	1	Number	2021	2048.487068469392	2355.411291018336	1797.2476940043648
6	Incidence	67	Japan	2	Female	14	45-49 years	441	Colon and rectum cancer	1	Number	2021	1442.771591039049	1711.326246766724	1239.6146263238095
6	Incidence	67	Japan	1	Male	14	45-49 years	441	Colon and rectum cancer	3	Rate	2021	40.812	46.9269	35.8066
6	Incidence	67	Japan	2	Female	14	45-49 years	441	Colon and rectum cancer	3	Rate	2021	29.4702	34.955690214099995	25.3205
6	Incidence	67	Japan	1	Male	15	50-54 years	441	Colon and rectum cancer	1	Number	2021	3729.464958614808	4207.958031501295	3228.827336861963
6	Incidence	67	Japan	2	Female	15	50-54 years	441	Colon and rectum cancer	1	Number	2021	2465.550745715421	2818.825664031584	2127.101417617568
6	Incidence	67	Japan	1	Male	15	50-54 years	441	Colon and rectum cancer	3	Rate	2021	79.0688	89.2134	68.45476527249001
6	Incidence	67	Japan	2	Female	15	50-54 years	441	Colon and rectum cancer	3	Rate	2021	52.9537	60.541175740300005	45.6847
6	Incidence	67	Japan	1	Male	16	55-59 years	441	Colon and rectum cancer	1	Number	2021	5430.071396332441	5891.573285399931	4801.985920647008
6	Incidence	67	Japan	2	Female	16	55-59 years	441	Colon and rectum cancer	1	Number	2021	3126.312280582294	3512.8728451704856	2674.6416606819
6	Incidence	67	Japan	1	Male	16	55-59 years	441	Colon and rectum cancer	3	Rate	2021	137.74311792946	149.44990859402	121.81064753771
6	Incidence	67	Japan	2	Female	16	55-59 years	441	Colon and rectum cancer	3	Rate	2021	79.10873575675001	88.8903	67.6796
6	Incidence	67	Japan	1	Male	17	60-64 years	441	Colon and rectum cancer	1	Number	2021	7981.737486050159	8724.02842461149	7070.750888090384
6	Incidence	67	Japan	2	Female	17	60-64 years	441	Colon and rectum cancer	1	Number	2021	4085.2686076890495	4561.460654128262	3440.074379353603
6	Incidence	67	Japan	1	Male	17	60-64 years	441	Colon and rectum cancer	3	Rate	2021	216.37399647364	236.49648950268	191.67839463519002
6	Incidence	67	Japan	2	Female	17	60-64 years	441	Colon and rectum cancer	3	Rate	2021	108.39093770894999	121.02533397508	91.2726
6	Incidence	67	Japan	1	Male	18	65-69 years	441	Colon and rectum cancer	1	Number	2021	13315.91152094609	14572.566111312644	11832.033262426332
6	Incidence	67	Japan	2	Female	18	65-69 years	441	Colon and rectum cancer	1	Number	2021	6387.335922973102	7225.901029796153	5323.866660643491
6	Incidence	67	Japan	1	Male	18	65-69 years	441	Colon and rectum cancer	3	Rate	2021	344.36596951384	376.86461413722003	305.991
6	Incidence	67	Japan	2	Female	18	65-69 years	441	Colon and rectum cancer	3	Rate	2021	156.55189368344	177.10489998107	130.48654673760998
6	Incidence	67	Japan	1	Male	19	70-74 years	441	Colon and rectum cancer	1	Number	2021	20272.445842926376	22145.377039830688	18106.9741628279
6	Incidence	67	Japan	2	Female	19	70-74 years	441	Colon and rectum cancer	1	Number	2021	10163.534757483245	11685.397731350178	8317.311703677115
6	Incidence	67	Japan	1	Male	19	70-74 years	441	Colon and rectum cancer	3	Rate	2021	439.07662541639	479.64204687296	392.17513138358
6	Incidence	67	Japan	2	Female	19	70-74 years	441	Colon and rectum cancer	3	Rate	2021	197.71844178709	227.32432035063	161.80255680217
6	Incidence	67	Japan	1	Male	20	75-79 years	441	Colon and rectum cancer	1	Number	2021	15947.932327349605	17785.05784942492	13889.862103587811
6	Incidence	67	Japan	2	Female	20	75-79 years	441	Colon and rectum cancer	1	Number	2021	9746.219394632031	11410.860504667824	7595.769369272635
6	Incidence	67	Japan	1	Male	20	75-79 years	441	Colon and rectum cancer	3	Rate	2021	522.63307206199	582.83790210878	455.18761634487
6	Incidence	67	Japan	2	Female	20	75-79 years	441	Colon and rectum cancer	3	Rate	2021	260.47286496067	304.96127851938	203.00095135193
6	Incidence	71	Australia	1	Male	12	35-39 years	441	Colon and rectum cancer	1	Number	2021	116.64060202124786	156.45176322268395	85.66125186508242
6	Incidence	71	Australia	2	Female	12	35-39 years	441	Colon and rectum cancer	1	Number	2021	108.1688586168332	138.5252275881407	81.56747256617524
6	Incidence	71	Australia	1	Male	12	35-39 years	441	Colon and rectum cancer	3	Rate	2021	12.671614765409998	16.9966	9.30608
6	Incidence	71	Australia	2	Female	12	35-39 years	441	Colon and rectum cancer	3	Rate	2021	11.3439	14.5274	8.55416
6	Incidence	71	Australia	1	Male	13	40-44 years	441	Colon and rectum cancer	1	Number	2021	185.6837922829378	236.8079782426384	141.6380504469481
6	Incidence	71	Australia	2	Female	13	40-44 years	441	Colon and rectum cancer	1	Number	2021	180.6295212170181	233.2472931198316	138.15988425000555
6	Incidence	71	Australia	1	Male	13	40-44 years	441	Colon and rectum cancer	3	Rate	2021	22.367	28.5253	17.0614
6	Incidence	71	Australia	2	Female	13	40-44 years	441	Colon and rectum cancer	3	Rate	2021	21.3028	27.5084	16.294091759740002
6	Incidence	71	Australia	1	Male	14	45-49 years	441	Colon and rectum cancer	1	Number	2021	328.212448286444	409.4667231610316	252.93597025115508
6	Incidence	71	Australia	2	Female	14	45-49 years	441	Colon and rectum cancer	1	Number	2021	278.404030803326	345.67267509104454	215.42666365493
6	Incidence	71	Australia	1	Male	14	45-49 years	441	Colon and rectum cancer	3	Rate	2021	40.2518	50.216758672270004	31.0199
6	Incidence	71	Australia	2	Female	14	45-49 years	441	Colon and rectum cancer	3	Rate	2021	32.9658	40.931040430450004	25.5086
6	Incidence	71	Australia	1	Male	15	50-54 years	441	Colon and rectum cancer	1	Number	2021	547.3017744729796	685.9289925960866	428.89842527774704
6	Incidence	71	Australia	2	Female	15	50-54 years	441	Colon and rectum cancer	1	Number	2021	445.5480033367955	567.7209602118672	336.3958099604332
6	Incidence	71	Australia	1	Male	15	50-54 years	441	Colon and rectum cancer	3	Rate	2021	68.7623	86.1793	53.8863
6	Incidence	71	Australia	2	Female	15	50-54 years	441	Colon and rectum cancer	3	Rate	2021	53.600312430559995	68.298	40.4691
6	Incidence	71	Australia	1	Male	16	55-59 years	441	Colon and rectum cancer	1	Number	2021	793.0989249902373	970.405235116618	633.7366005964814
6	Incidence	71	Australia	2	Female	16	55-59 years	441	Colon and rectum cancer	1	Number	2021	598.3262760880875	756.3301601916396	460.14373487290993
6	Incidence	71	Australia	1	Male	16	55-59 years	441	Colon and rectum cancer	3	Rate	2021	104.55008440057	127.92344818201	83.5422
6	Incidence	71	Australia	2	Female	16	55-59 years	441	Colon and rectum cancer	3	Rate	2021	75.6546	95.63319688824001	58.1823
6	Incidence	71	Australia	1	Male	17	60-64 years	441	Colon and rectum cancer	1	Number	2021	1114.122562722897	1335.8445717406498	902.3387414947912
6	Incidence	71	Australia	2	Female	17	60-64 years	441	Colon and rectum cancer	1	Number	2021	777.2729583149669	974.575676308313	605.1923826800933
6	Incidence	71	Australia	1	Male	17	60-64 years	441	Colon and rectum cancer	3	Rate	2021	156.105	187.17202194403	126.43130068938
6	Incidence	71	Australia	2	Female	17	60-64 years	441	Colon and rectum cancer	3	Rate	2021	102.51444757569	128.53668200942	79.8188
6	Incidence	71	Australia	1	Male	18	65-69 years	441	Colon and rectum cancer	1	Number	2021	1476.3350989800713	1825.7147367168263	1164.0219469087542
6	Incidence	71	Australia	2	Female	18	65-69 years	441	Colon and rectum cancer	1	Number	2021	874.4309056999715	1082.9057008642442	685.8514955761799
6	Incidence	71	Australia	1	Male	18	65-69 years	441	Colon and rectum cancer	3	Rate	2021	234.85275601423	290.43144602466	185.17053647335
6	Incidence	71	Australia	2	Female	18	65-69 years	441	Colon and rectum cancer	3	Rate	2021	129.75275043671002	160.68735932687	101.77032554780001
6	Incidence	71	Australia	1	Male	19	70-74 years	441	Colon and rectum cancer	1	Number	2021	1696.6059446875952	2088.304364658547	1350.6888323021342
6	Incidence	71	Australia	2	Female	19	70-74 years	441	Colon and rectum cancer	1	Number	2021	1122.6485931967202	1386.678771678845	871.4618733373933
6	Incidence	71	Australia	1	Male	19	70-74 years	441	Colon and rectum cancer	3	Rate	2021	300.71797321944	370.14526441557	239.40527225654998
6	Incidence	71	Australia	2	Female	19	70-74 years	441	Colon and rectum cancer	3	Rate	2021	186.79828260228	230.73044819222997	145.00314905242
6	Incidence	71	Australia	1	Male	20	75-79 years	441	Colon and rectum cancer	1	Number	2021	1624.1922024413234	2012.918270077549	1295.221630079716
6	Incidence	71	Australia	2	Female	20	75-79 years	441	Colon and rectum cancer	1	Number	2021	1209.5505266841872	1490.9343832837594	928.178317833518
6	Incidence	71	Australia	1	Male	20	75-79 years	441	Colon and rectum cancer	3	Rate	2021	411.87688260282	510.45344311320997	328.45364389455
6	Incidence	71	Australia	2	Female	20	75-79 years	441	Colon and rectum cancer	3	Rate	2021	281.46191640285	346.93982557334	215.98671765881
