# Supplementary material for: Temporal Trends, Projections, and Risk Attribution of Colorectal Cancer in Australia, China, Japan, and Korea: GBD 2021 Analysis (1990–2041)
Source: Research Square preprint supplement (doi:10.21203/rs.3.rs-7388179/v1), 2025-09-22
Supplement: Supplementary file 2 [file 21b6e81c22d83e578e36f42e.xlsx]

## Sheet: Sheet1
Average annual percent change（AAPC） among four countries from 1990 to 2021
Measure	location_name	Joinpoint.Model	AAPC.Index	Start.Obs	End.Obs	val	lower	upper	Statistically.Significant..0.No..1.Yes.	Test.Statistic	P.Value	AAPC
Prevalence	Australia	2	0	1990	2021	0.13	-0.04	0.3	0	1.5285	0.126399	0.13 (-0.04 - 0.30)
	China	3	0	1990	2021	2.95	2.8	3.11	1	37.9803	0	2.95 (2.80 - 3.11)
	Japan	5	0	1990	2021	0.67	0.5	0.84	1	7.7339	0	0.67 (0.50 - 0.84)
	Republic of Korea	3	0	1990	2021	3.08	2.88	3.28	1	30.5974	0	3.08 (2.88 - 3.28)
Incidence	Australia	2	0	1990	2021	-0.42	-0.6	-0.24	1	-4.5177	6e-06	-0.42 (-0.60 - -0.24)
	China	3	0	1990	2021	1.66	1.39	1.94	1	12.1123	0	1.66 (1.39 - 1.94)
	Japan	4	0	1990	2021	0.36	0.09	0.64	1	2.5612	0.01043	0.36 (0.09 - 0.64)
	Republic of Korea	4	0	1990	2021	1.97	1.71	2.22	1	15.3243	0	1.97 (1.71 - 2.22)
Deaths	Australia	4	0	1990	2021	-1.71	-2.01	-1.4	1	-10.9712	0	-1.71 (-2.01 - -1.40)
	China	5	0	1990	2021	-0.42	-0.58	-0.25	1	-4.8935	1e-06	-0.42 (-0.58 - -0.25)
	Japan	3	0	1990	2021	-0.59	-0.77	-0.41	1	-6.4435	0	-0.59 (-0.77 - -0.41)
	Republic of Korea	2	0	1990	2021	-0.48	-0.6	-0.37	1	-8.1649	0	-0.48 (-0.60 - -0.37)
DALYs	Australia	2	0	1990	2021	-1.8	-1.98	-1.61	1	-19.2292	0	-1.80 (-1.98 - -1.61)
	China	5	0	1990	2021	-0.54	-0.67	-0.4	1	-7.819	0	-0.54 (-0.67 - -0.40)
	Japan	5	0	1990	2021	-0.73	-0.96	-0.49	1	-6.005	0	-0.73 (-0.96 - -0.49)
	Republic of Korea	4	0	1990	2021	-0.79	-0.95	-0.63	1	-9.8399	0	-0.79 (-0.95 - -0.63)
