# Supplementary material for: Temporal Trends, Projections, and Risk Attribution of Colorectal Cancer in Australia, China, Japan, and Korea: GBD 2021 Analysis (1990–2041)
Source: Research Square preprint supplement (doi:10.21203/rs.3.rs-7388179/v1), 2025-09-22
Supplement: Supplementary file 3 [file 384934bdc587f09fcb225b09.xlsx]

## Sheet: Sheet1
Table S1.Number and rates of colorectal cancer in Australia,China,Japan and Republic of Korea from 1990 to 2021.
measure_id	measure_name	location_id	location_name	sex_id	sex_name	age_id	age_name	cause_id	cause_name	metric_id	metric_name	year	val	upper	lower
1	Deaths	6	China	1	Male	22	All ages	441	Colon and rectum cancer	1	Number	1990	66235.4372759585	80322.11412703355	52778.522612199195
1	Deaths	6	China	2	Female	22	All ages	441	Colon and rectum cancer	1	Number	1990	53068.06138505385	64519.103338850146	42217.24406436024
1	Deaths	6	China	3	Both	22	All ages	441	Colon and rectum cancer	1	Number	1990	119303.49866101252	137153.1265138105	102706.41700312108
1	Deaths	6	China	1	Male	22	All ages	441	Colon and rectum cancer	3	Rate	1990	10.914826745178953	13.236146624207137	8.697284321964604
1	Deaths	6	China	2	Female	22	All ages	441	Colon and rectum cancer	3	Rate	1990	9.316423208141668	11.326723758630559	7.411495768258086
1	Deaths	6	China	3	Both	22	All ages	441	Colon and rectum cancer	3	Rate	1990	10.140910080905659	11.658145309246935	8.730142462293253
1	Deaths	6	China	1	Male	27	Age-standardized	441	Colon and rectum cancer	3	Rate	1990	18.556034221558665	22.071563732931512	15.05387125226398
1	Deaths	6	China	2	Female	27	Age-standardized	441	Colon and rectum cancer	3	Rate	1990	13.233364602602117	16.023386044425934	10.700824099119789
1	Deaths	6	China	3	Both	27	Age-standardized	441	Colon and rectum cancer	3	Rate	1990	15.49258138474568	17.703843424237807	13.428859487592051
1	Deaths	6	China	1	Male	22	All ages	441	Colon and rectum cancer	1	Number	1991	68111.444627541	82708.89344972356	55105.067399582105
1	Deaths	6	China	2	Female	22	All ages	441	Colon and rectum cancer	1	Number	1991	53971.09474031487	64523.4242935846	44887.45575055582
1	Deaths	6	China	3	Both	22	All ages	441	Colon and rectum cancer	1	Number	1991	122082.53936785579	139526.38352446834	106983.54444491073
1	Deaths	6	China	1	Male	22	All ages	441	Colon and rectum cancer	3	Rate	1991	11.059993646705363	13.430339659982607	8.94800717667074
1	Deaths	6	China	2	Female	22	All ages	441	Colon and rectum cancer	3	Rate	1991	9.3541629485518	11.183071748772445	7.779804679836629
1	Deaths	6	China	3	Both	22	All ages	441	Colon and rectum cancer	3	Rate	1991	10.23486654499504	11.69728220164077	8.969032800054203
1	Deaths	6	China	1	Male	27	Age-standardized	441	Colon and rectum cancer	3	Rate	1991	18.53153639182601	22.01344374330217	15.241018402895747
1	Deaths	6	China	2	Female	27	Age-standardized	441	Colon and rectum cancer	3	Rate	1991	13.08653929132854	15.6128963460583	10.93781655474841
1	Deaths	6	China	3	Both	27	Age-standardized	441	Colon and rectum cancer	3	Rate	1991	15.40375914836935	17.48293783101119	13.513560965096183
1	Deaths	6	China	1	Male	22	All ages	441	Colon and rectum cancer	1	Number	1992	69742.99834285918	83117.29662832648	57196.13638876882
1	Deaths	6	China	2	Female	22	All ages	441	Colon and rectum cancer	1	Number	1992	54894.042797111266	65160.69141179854	46261.95213234499
1	Deaths	6	China	3	Both	22	All ages	441	Colon and rectum cancer	1	Number	1992	124637.04113997045	140601.89258655216	108789.86508571674
1	Deaths	6	China	1	Male	22	All ages	441	Colon and rectum cancer	3	Rate	1992	11.190653886813449	13.336634797411797	9.17743976023398
1	Deaths	6	China	2	Female	22	All ages	441	Colon and rectum cancer	3	Rate	1992	9.41555799524345	11.17651821101137	7.9349610828480115
1	Deaths	6	China	3	Both	22	All ages	441	Colon and rectum cancer	3	Rate	1992	10.33269322099395	11.656215592894759	9.018926405847921
1	Deaths	6	China	1	Male	27	Age-standardized	441	Colon and rectum cancer	3	Rate	1992	18.476272143484145	21.715414359247287	15.488469341191077
1	Deaths	6	China	2	Female	27	Age-standardized	441	Colon and rectum cancer	3	Rate	1992	12.975145360886819	15.33303002719985	11.0350904796167
1	Deaths	6	China	3	Both	27	Age-standardized	441	Colon and rectum cancer	3	Rate	1992	15.322349301179452	17.173377595785407	13.509597264779622
1	Deaths	6	China	1	Male	22	All ages	441	Colon and rectum cancer	1	Number	1994	72279.3910763182	83632.26506731796	61266.723526268346
1	Deaths	6	China	2	Female	22	All ages	441	Colon and rectum cancer	1	Number	1994	56902.36175206686	65993.52005726575	49063.56147311787
1	Deaths	6	China	3	Both	22	All ages	441	Colon and rectum cancer	1	Number	1994	129181.7528283852	143539.14760331658	115546.78976864443
1	Deaths	6	China	1	Male	22	All ages	441	Colon and rectum cancer	3	Rate	1994	11.399923493961325	13.190501596609232	9.663002835589415
1	Deaths	6	China	2	Female	22	All ages	441	Colon and rectum cancer	3	Rate	1994	9.607436030662441	11.142393792914746	8.28392730592298
1	Deaths	6	China	3	Both	22	All ages	441	Colon and rectum cancer	3	Rate	1994	10.534199814619296	11.704981771552658	9.422328964507244
1	Deaths	6	China	1	Male	27	Age-standardized	441	Colon and rectum cancer	3	Rate	1994	18.21208989145069	20.90325995772702	15.564362810171023
1	Deaths	6	China	2	Female	27	Age-standardized	441	Colon and rectum cancer	3	Rate	1994	12.78309533474291	14.742410508868344	11.142328735614853
1	Deaths	6	China	3	Both	27	Age-standardized	441	Colon and rectum cancer	3	Rate	1994	15.099681772340588	16.688543299239043	13.5613535582423
1	Deaths	6	China	1	Male	22	All ages	441	Colon and rectum cancer	1	Number	1997	77297.19736920946	87711.00172509081	66619.69533922464
1	Deaths	6	China	2	Female	22	All ages	441	Colon and rectum cancer	1	Number	1997	58515.19569098166	67227.68693810339	51897.03586076415
1	Deaths	6	China	3	Both	22	All ages	441	Colon and rectum cancer	1	Number	1997	135812.39306019124	148445.0684103377	122709.77281032185
1	Deaths	6	China	1	Male	22	All ages	441	Colon and rectum cancer	3	Rate	1997	12.021075923841991	13.640605959583645	10.36053625425555
1	Deaths	6	China	2	Female	22	All ages	441	Colon and rectum cancer	3	Rate	1997	9.720500522031257	11.167813048560005	8.621096763317842
1	Deaths	6	China	3	Both	22	All ages	441	Colon and rectum cancer	3	Rate	1997	10.908703435362627	11.92338336172907	9.856276662581635
1	Deaths	6	China	1	Male	27	Age-standardized	441	Colon and rectum cancer	3	Rate	1997	18.064296383777137	20.332114915871287	15.833161972717235
1	Deaths	6	China	2	Female	27	Age-standardized	441	Colon and rectum cancer	3	Rate	1997	12.163958647907174	13.985271800873324	10.74290592568816
1	Deaths	6	China	3	Both	27	Age-standardized	441	Colon and rectum cancer	3	Rate	1997	14.700493181772595	16.114132408675115	13.358974025972783
1	Deaths	6	China	1	Male	22	All ages	441	Colon and rectum cancer	1	Number	1995	74070.04158947656	84574.77203643152	63222.690836634465
1	Deaths	6	China	2	Female	22	All ages	441	Colon and rectum cancer	1	Number	1995	57564.736599259566	66222.44354498015	50123.1823968746
1	Deaths	6	China	3	Both	22	All ages	441	Colon and rectum cancer	1	Number	1995	131634.77818873612	144378.74707795997	118789.72177415893
1	Deaths	6	China	1	Male	22	All ages	441	Colon and rectum cancer	3	Rate	1995	11.612880169436478	13.259837201927885	9.912206297174222
1	Deaths	6	China	2	Female	22	All ages	441	Colon and rectum cancer	3	Rate	1995	9.65980652077938	11.112636481445692	8.411056364770571
1	Deaths	6	China	3	Both	22	All ages	441	Colon and rectum cancer	3	Rate	1995	10.669513185179206	11.702461665558257	9.628371165832311
1	Deaths	6	China	1	Male	27	Age-standardized	441	Colon and rectum cancer	3	Rate	1995	18.222496206474272	20.57893067172817	15.765521210953654
1	Deaths	6	China	2	Female	27	Age-standardized	441	Colon and rectum cancer	3	Rate	1995	12.629793769607513	14.479680062199527	10.958053788282792
1	Deaths	6	China	3	Both	27	Age-standardized	441	Colon and rectum cancer	3	Rate	1995	15.027087654355908	16.4765895983238	13.516241962205601
1	Deaths	6	China	1	Male	22	All ages	441	Colon and rectum cancer	1	Number	1999	81694.12663858013	91655.61510307262	71473.89553222877
1	Deaths	6	China	2	Female	22	All ages	441	Colon and rectum cancer	1	Number	1999	61135.413645999535	69521.19233646091	54291.926995827576
1	Deaths	6	China	3	Both	22	All ages	441	Colon and rectum cancer	1	Number	1999	142829.54028457985	155794.08913101425	130229.81896760632
1	Deaths	6	China	1	Male	22	All ages	441	Colon and rectum cancer	3	Rate	1999	12.632481161794173	14.172840555411867	11.052112018595619
1	Deaths	6	China	2	Female	22	All ages	441	Colon and rectum cancer	3	Rate	1999	10.064175820324877	11.444651490610312	8.937593880924155
1	Deaths	6	China	3	Both	22	All ages	441	Colon and rectum cancer	3	Rate	1999	11.388510383780472	12.42223841276154	10.38387187017054
1	Deaths	6	China	1	Male	27	Age-standardized	441	Colon and rectum cancer	3	Rate	1999	18.110198947169838	20.093258138165822	15.844970445742321
1	Deaths	6	China	2	Female	27	Age-standardized	441	Colon and rectum cancer	3	Rate	1999	12.019923405574549	13.657605212772625	10.675315461436933
1	Deaths	6	China	3	Both	27	Age-standardized	441	Colon and rectum cancer	3	Rate	1999	14.635604660540634	16.009726131955013	13.32456682077738
1	Deaths	6	China	1	Male	22	All ages	441	Colon and rectum cancer	1	Number	1998	79276.19274666358	89475.1932178489	68749.45620656034
1	Deaths	6	China	2	Female	22	All ages	441	Colon and rectum cancer	1	Number	1998	59729.29496589076	68236.08434628473	52516.78782413883
1	Deaths	6	China	3	Both	22	All ages	441	Colon and rectum cancer	1	Number	1998	139005.48771255443	151967.37424252558	126147.5110015465
1	Deaths	6	China	1	Male	22	All ages	441	Colon and rectum cancer	3	Rate	1998	12.29268792358289	13.874160564750204	10.660396025373482
1	Deaths	6	China	2	Female	22	All ages	441	Colon and rectum cancer	3	Rate	1998	9.87748378187791	11.284258701767348	8.684745405173215
1	Deaths	6	China	3	Both	22	All ages	441	Colon and rectum cancer	3	Rate	1998	11.123938179629299	12.16121538949694	10.09497637098376
1	Deaths	6	China	1	Male	27	Age-standardized	441	Colon and rectum cancer	3	Rate	1998	18.056670835590552	20.21987538346905	15.743950871048725
1	Deaths	6	China	2	Female	27	Age-standardized	441	Colon and rectum cancer	3	Rate	1998	12.080018484205922	13.800968185516014	10.61932578559324
1	Deaths	6	China	3	Both	27	Age-standardized	441	Colon and rectum cancer	3	Rate	1998	14.6468365847464	16.04675160835657	13.319604917724721
1	Deaths	6	China	1	Male	22	All ages	441	Colon and rectum cancer	1	Number	2000	85906.48524326719	96035.32525228577	75163.98909389817
1	Deaths	6	China	2	Female	22	All ages	441	Colon and rectum cancer	1	Number	2000	62247.646843224844	70042.19202842479	55317.4826762169
1	Deaths	6	China	3	Both	22	All ages	441	Colon and rectum cancer	1	Number	2000	148154.13208649197	160541.47302042163	135899.5693476841
1	Deaths	6	China	1	Male	22	All ages	441	Colon and rectum cancer	3	Rate	2000	13.243769406285057	14.805281567476753	11.587652974012576
1	Deaths	6	China	2	Female	22	All ages	441	Colon and rectum cancer	3	Rate	2000	10.197344464693233	11.474238712588008	9.062052212026394
1	Deaths	6	China	3	Both	22	All ages	441	Colon and rectum cancer	3	Rate	2000	11.766801708814372	12.750637815281735	10.793511205572793
1	Deaths	6	China	1	Male	27	Age-standardized	441	Colon and rectum cancer	3	Rate	2000	18.57800452949859	20.57121506175047	16.405487256950273
1	Deaths	6	China	2	Female	27	Age-standardized	441	Colon and rectum cancer	3	Rate	2000	11.930310828397536	13.444015118542582	10.538901348073423
1	Deaths	6	China	3	Both	27	Age-standardized	441	Colon and rectum cancer	3	Rate	2000	14.799235585132484	15.98789082651152	13.577853136412555
1	Deaths	6	China	1	Male	22	All ages	441	Colon and rectum cancer	1	Number	2003	95267.11991853532	105864.55702595359	85004.47404221738
1	Deaths	6	China	2	Female	22	All ages	441	Colon and rectum cancer	1	Number	2003	65033.63257988849	74149.84237481111	57970.36856396028
1	Deaths	6	China	3	Both	22	All ages	441	Colon and rectum cancer	1	Number	2003	160300.75249842386	174762.07428199874	146730.27796932962
1	Deaths	6	China	1	Male	22	All ages	441	Colon and rectum cancer	3	Rate	2003	14.506621190250788	16.12032595886649	12.943896125561734
1	Deaths	6	China	2	Female	22	All ages	441	Colon and rectum cancer	3	Rate	2003	10.465629075259667	11.93266799806178	9.328963348329404
1	Deaths	6	China	3	Both	22	All ages	441	Colon and rectum cancer	3	Rate	2003	12.541948807066795	13.673404241088555	11.480193361887743
1	Deaths	6	China	1	Male	27	Age-standardized	441	Colon and rectum cancer	3	Rate	2003	19.03695762746326	20.995099612260603	17.19559894206325
1	Deaths	6	China	2	Female	27	Age-standardized	441	Colon and rectum cancer	3	Rate	2003	11.434877978119761	12.988338709849055	10.13617287053338
1	Deaths	6	China	3	Both	27	Age-standardized	441	Colon and rectum cancer	3	Rate	2003	14.703366311119272	16.07943491417212	13.489450901888148
1	Deaths	6	China	1	Male	22	All ages	441	Colon and rectum cancer	1	Number	2001	88800.45306999245	99398.63075216458	78119.28187708143
1	Deaths	6	China	2	Female	22	All ages	441	Colon and rectum cancer	1	Number	2001	63327.35844916569	71978.47917426121	55114.74531589068
1	Deaths	6	China	3	Both	22	All ages	441	Colon and rectum cancer	1	Number	2001	152127.81151915813	166476.37500491142	140000.5911361895
1	Deaths	6	China	1	Male	22	All ages	441	Colon and rectum cancer	3	Rate	2001	13.639576260026466	15.267435665195926	11.998969213604322
1	Deaths	6	China	2	Female	22	All ages	441	Colon and rectum cancer	3	Rate	2001	10.317227933288915	11.72665960050205	8.9792374707318
1	Deaths	6	China	3	Both	22	All ages	441	Colon and rectum cancer	3	Rate	2001	12.027321022980795	13.161727529841272	11.06853530716821
1	Deaths	6	China	1	Male	27	Age-standardized	441	Colon and rectum cancer	3	Rate	2001	18.699361300539998	20.743563961989206	16.637254271280487
1	Deaths	6	China	2	Female	27	Age-standardized	441	Colon and rectum cancer	3	Rate	2001	11.826435009933878	13.366547275792387	10.350307569027054
1	Deaths	6	China	3	Both	27	Age-standardized	441	Colon and rectum cancer	3	Rate	2001	14.803006231527213	16.10131331158129	13.639736073143018
1	Deaths	6	China	1	Male	22	All ages	441	Colon and rectum cancer	1	Number	2004	99514.29269863613	111454.13228515268	88411.37000189924
1	Deaths	6	China	2	Female	22	All ages	441	Colon and rectum cancer	1	Number	2004	66817.54081667977	75326.82930924559	58973.83945535206
1	Deaths	6	China	3	Both	22	All ages	441	Colon and rectum cancer	1	Number	2004	166331.83351531593	181039.56491637355	153149.66301422534
1	Deaths	6	China	1	Male	22	All ages	441	Colon and rectum cancer	3	Rate	2004	15.08331993251669	16.89303405038454	13.400456791158302
1	Deaths	6	China	2	Female	22	All ages	441	Colon and rectum cancer	3	Rate	2004	10.682916495772988	12.043397849822318	9.428850488005052
1	Deaths	6	China	3	Both	22	All ages	441	Colon and rectum cancer	3	Rate	2004	12.941840881976685	14.086210636728472	11.916170993665775
1	Deaths	6	China	1	Male	27	Age-standardized	441	Colon and rectum cancer	3	Rate	2004	19.32626506612532	21.364467277845165	17.266526489940297
1	Deaths	6	China	2	Female	27	Age-standardized	441	Colon and rectum cancer	3	Rate	2004	11.412138734705378	12.854925910141	10.017558368426068
1	Deaths	6	China	3	Both	27	Age-standardized	441	Colon and rectum cancer	3	Rate	2004	14.81742424805574	16.064933457277565	13.544117171174268
1	Deaths	6	China	1	Male	22	All ages	441	Colon and rectum cancer	1	Number	2005	101887.37226857057	113021.36211197618	90865.65941619189
1	Deaths	6	China	2	Female	22	All ages	441	Colon and rectum cancer	1	Number	2005	67591.98178248016	74686.82203670879	60933.29447409852
1	Deaths	6	China	3	Both	22	All ages	441	Colon and rectum cancer	1	Number	2005	169479.3540510506	183287.57317357135	156998.02358846492
1	Deaths	6	China	1	Male	22	All ages	441	Colon and rectum cancer	3	Rate	2005	15.365610960441455	17.044725384163335	13.703429003673204
1	Deaths	6	China	2	Female	22	All ages	441	Colon and rectum cancer	3	Rate	2005	10.732852556767337	11.859434029219313	9.675527305786131
1	Deaths	6	China	3	Both	22	All ages	441	Colon and rectum cancer	3	Rate	2005	13.108930226723748	14.176971712047742	12.143521247636926
1	Deaths	6	China	1	Male	27	Age-standardized	441	Colon and rectum cancer	3	Rate	2005	19.22499089708186	21.049085524815073	17.2584697852742
1	Deaths	6	China	2	Female	27	Age-standardized	441	Colon and rectum cancer	3	Rate	2005	11.212484317933352	12.405651472108365	10.089845194294147
1	Deaths	6	China	3	Both	27	Age-standardized	441	Colon and rectum cancer	3	Rate	2005	14.663383268301427	15.831729274057974	13.608228991862195
1	Deaths	6	China	1	Male	22	All ages	441	Colon and rectum cancer	1	Number	2006	101617.60568469443	113616.32278788302	90512.71851495367
1	Deaths	6	China	2	Female	22	All ages	441	Colon and rectum cancer	1	Number	2006	66786.03751084517	73846.43284225883	60042.76280086061
1	Deaths	6	China	3	Both	22	All ages	441	Colon and rectum cancer	1	Number	2006	168403.64319553963	182321.7686604441	154921.99083873158
1	Deaths	6	China	1	Male	22	All ages	441	Colon and rectum cancer	3	Rate	2006	15.23775094066083	17.036981119269242	13.57255224033228
1	Deaths	6	China	2	Female	22	All ages	441	Colon and rectum cancer	3	Rate	2006	10.52666184977332	11.639505146808874	9.463802376779292
1	Deaths	6	China	3	Both	22	All ages	441	Colon and rectum cancer	3	Rate	2006	12.94091567967612	14.010448883606546	11.904923090314009
1	Deaths	6	China	1	Male	27	Age-standardized	441	Colon and rectum cancer	3	Rate	2006	18.386457164871658	20.450851968251214	16.506543449315167
1	Deaths	6	China	2	Female	27	Age-standardized	441	Colon and rectum cancer	3	Rate	2006	10.673096439503494	11.818687682861716	9.551399511219342
1	Deaths	6	China	3	Both	27	Age-standardized	441	Colon and rectum cancer	3	Rate	2006	14.013204836761634	15.128980402858408	12.9037291862165
1	Deaths	6	China	1	Male	22	All ages	441	Colon and rectum cancer	1	Number	2007	104531.37388583324	118316.8624299299	92664.11647112665
1	Deaths	6	China	2	Female	22	All ages	441	Colon and rectum cancer	1	Number	2007	67247.49571706523	76067.49955511885	60586.72821255745
1	Deaths	6	China	3	Both	22	All ages	441	Colon and rectum cancer	1	Number	2007	171778.8696028985	188578.96926170163	157425.23439590598
1	Deaths	6	China	1	Male	22	All ages	441	Colon and rectum cancer	3	Rate	2007	15.576111492363276	17.63027282744783	13.807783786253442
1	Deaths	6	China	2	Female	22	All ages	441	Colon and rectum cancer	3	Rate	2007	10.51662248191412	11.895954896672057	9.474966186199701
1	Deaths	6	China	3	Both	22	All ages	441	Colon and rectum cancer	3	Rate	2007	13.107481497854321	14.389402818846381	12.01223614935757
1	Deaths	6	China	1	Male	27	Age-standardized	441	Colon and rectum cancer	3	Rate	2007	18.32045351404773	20.808775078159343	16.321603657768826
1	Deaths	6	China	2	Female	27	Age-standardized	441	Colon and rectum cancer	3	Rate	2007	10.369102534499469	11.766313136381848	9.294815453027548
1	Deaths	6	China	3	Both	27	Age-standardized	441	Colon and rectum cancer	3	Rate	2007	13.806856871927643	15.226817616807354	12.628491396863865
1	Deaths	6	China	1	Male	22	All ages	441	Colon and rectum cancer	1	Number	2008	109480.98681171557	123155.8671051529	97133.72994769944
1	Deaths	6	China	2	Female	22	All ages	441	Colon and rectum cancer	1	Number	2008	68787.19428499778	76492.68742953552	60680.10888534516
1	Deaths	6	China	3	Both	22	All ages	441	Colon and rectum cancer	1	Number	2008	178268.18109671323	194017.2503227125	163273.1154528874
1	Deaths	6	China	1	Male	22	All ages	441	Colon and rectum cancer	3	Rate	2008	16.208635989194722	18.23319900535873	14.380627329406988
1	Deaths	6	China	2	Female	22	All ages	441	Colon and rectum cancer	3	Rate	2008	10.673372217346495	11.868995869462818	9.415435460836298
1	Deaths	6	China	3	Both	22	All ages	441	Colon and rectum cancer	3	Rate	2008	13.505950125537638	14.699130771581183	12.369894282768904
1	Deaths	6	China	1	Male	27	Age-standardized	441	Colon and rectum cancer	3	Rate	2008	18.501762550009197	20.652651421530415	16.569650218532257
1	Deaths	6	China	2	Female	27	Age-standardized	441	Colon and rectum cancer	3	Rate	2008	10.263550270217694	11.3991849032518	9.020290265177438
1	Deaths	6	China	3	Both	27	Age-standardized	441	Colon and rectum cancer	3	Rate	2008	13.857228725574577	15.100188863268176	12.663804571761387
1	Deaths	6	China	1	Male	22	All ages	441	Colon and rectum cancer	1	Number	2009	114962.4761545158	130015.38067673762	102086.74703061521
1	Deaths	6	China	2	Female	22	All ages	441	Colon and rectum cancer	1	Number	2009	70367.24317290685	78981.8231496403	62481.79272840461
1	Deaths	6	China	3	Both	22	All ages	441	Colon and rectum cancer	1	Number	2009	185329.71932742262	201007.9415254629	169612.454549224
1	Deaths	6	China	1	Male	22	All ages	441	Colon and rectum cancer	3	Rate	2009	16.91498783533829	19.129794834951515	15.02051923317314
1	Deaths	6	China	2	Female	22	All ages	441	Colon and rectum cancer	3	Rate	2009	10.837163668512208	12.163883445126862	9.622736142098665
1	Deaths	6	China	3	Both	22	All ages	441	Colon and rectum cancer	3	Rate	2009	13.945440767244344	15.125174486109985	12.762769224963357
1	Deaths	6	China	1	Male	27	Age-standardized	441	Colon and rectum cancer	3	Rate	2009	18.73036093430925	21.025560120463417	16.80359469555822
1	Deaths	6	China	2	Female	27	Age-standardized	441	Colon and rectum cancer	3	Rate	2009	10.139034786192001	11.334597063995455	9.024030972929383
1	Deaths	6	China	3	Both	27	Age-standardized	441	Colon and rectum cancer	3	Rate	2009	13.913511128736216	15.078935434621252	12.787304780608341
1	Deaths	67	Japan	1	Male	22	All ages	441	Colon and rectum cancer	1	Number	1990	16787.03661086643	17295.16640767381	16132.063888383615
1	Deaths	67	Japan	2	Female	22	All ages	441	Colon and rectum cancer	1	Number	1990	14564.277571243256	15369.150476368071	13138.043912345887
1	Deaths	67	Japan	3	Both	22	All ages	441	Colon and rectum cancer	1	Number	1990	31351.314182109672	32588.03304695942	29409.628095212374
1	Deaths	67	Japan	1	Male	22	All ages	441	Colon and rectum cancer	3	Rate	1990	27.137333794649148	27.958758577748938	26.078527895286264
1	Deaths	67	Japan	2	Female	22	All ages	441	Colon and rectum cancer	3	Rate	1990	22.76780135111465	24.026029665367513	20.538222543157552
1	Deaths	67	Japan	3	Both	22	All ages	441	Colon and rectum cancer	3	Rate	1990	24.915945664603907	25.898807813858554	23.372822312331223
1	Deaths	67	Japan	1	Male	27	Age-standardized	441	Colon and rectum cancer	3	Rate	1990	24.26193420396341	25.070279758305997	23.204352040266553
1	Deaths	67	Japan	2	Female	27	Age-standardized	441	Colon and rectum cancer	3	Rate	1990	15.269733136570316	16.132252115227484	13.75170508011939
1	Deaths	67	Japan	3	Both	27	Age-standardized	441	Colon and rectum cancer	3	Rate	1990	18.998607161269415	19.820851470747655	17.729212154630797
1	Deaths	71	Australia	1	Male	22	All ages	441	Colon and rectum cancer	1	Number	1990	2388.99395648489	2596.356330766526	2189.275533095066
1	Deaths	71	Australia	2	Female	22	All ages	441	Colon and rectum cancer	1	Number	1990	2214.50318494837	2462.8825067257317	1949.6721141774808
1	Deaths	71	Australia	3	Both	22	All ages	441	Colon and rectum cancer	1	Number	1990	4603.497141433261	5026.494211100906	4165.617288614527
1	Deaths	71	Australia	1	Male	22	All ages	441	Colon and rectum cancer	3	Rate	1990	28.50026692384465	30.974062640634365	26.117662162217503
1	Deaths	71	Australia	2	Female	22	All ages	441	Colon and rectum cancer	3	Rate	1990	26.124792246993913	29.054956549301775	23.000544446645964
1	Deaths	71	Australia	3	Both	22	All ages	441	Colon and rectum cancer	3	Rate	1990	27.305887566761932	29.814917130711713	24.708579984836053
1	Deaths	71	Australia	1	Male	27	Age-standardized	441	Colon and rectum cancer	3	Rate	1990	28.61793127994504	31.168007320780834	26.159840651868414
1	Deaths	71	Australia	2	Female	27	Age-standardized	441	Colon and rectum cancer	3	Rate	1990	20.138254581143936	22.374192657441707	17.796625675604165
1	Deaths	71	Australia	3	Both	27	Age-standardized	441	Colon and rectum cancer	3	Rate	1990	23.798107179204813	25.99842012602697	21.55860465793804
1	Deaths	67	Japan	1	Male	22	All ages	441	Colon and rectum cancer	1	Number	1992	18590.546627682725	19117.43295009798	17825.234920160598
1	Deaths	67	Japan	2	Female	22	All ages	441	Colon and rectum cancer	1	Number	1992	15892.909868263238	16834.482255556533	14216.723036715443
1	Deaths	67	Japan	3	Both	22	All ages	441	Colon and rectum cancer	1	Number	1992	34483.45649594598	35833.07417830778	32183.504618599374
1	Deaths	67	Japan	1	Male	22	All ages	441	Colon and rectum cancer	3	Rate	1992	29.8859029902162	30.73291807987077	28.655598583016854
1	Deaths	67	Japan	2	Female	22	All ages	441	Colon and rectum cancer	3	Rate	1992	24.68316573642726	26.145515141353677	22.07989184188825
1	Deaths	67	Japan	3	Both	22	All ages	441	Colon and rectum cancer	3	Rate	1992	27.239684294517573	28.305794346163843	25.422872135943237
1	Deaths	67	Japan	1	Male	27	Age-standardized	441	Colon and rectum cancer	3	Rate	1992	25.037233542462964	25.808598199640304	23.912501003643193
1	Deaths	67	Japan	2	Female	27	Age-standardized	441	Colon and rectum cancer	3	Rate	1992	15.463002108072649	16.367310117701994	13.857720271000801
1	Deaths	67	Japan	3	Both	27	Age-standardized	441	Colon and rectum cancer	3	Rate	1992	19.450803965451865	20.26865833123529	18.074174976161725
1	Deaths	71	Australia	1	Male	22	All ages	441	Colon and rectum cancer	1	Number	1997	2683.7302630455365	2881.3251763708345	2498.36149733685
1	Deaths	71	Australia	2	Female	22	All ages	441	Colon and rectum cancer	1	Number	1997	2439.4843858477066	2702.4611848091386	2122.2497523571865
1	Deaths	71	Australia	3	Both	22	All ages	441	Colon and rectum cancer	1	Number	1997	5123.214648893247	5526.664543573944	4628.356083627403
1	Deaths	71	Australia	1	Male	22	All ages	441	Colon and rectum cancer	3	Rate	1997	29.670128588564435	31.85465009861919	27.620773930753636
1	Deaths	71	Australia	2	Female	22	All ages	441	Colon and rectum cancer	3	Rate	1997	26.45191389742896	29.303434359500677	23.01206273090561
1	Deaths	71	Australia	3	Both	22	All ages	441	Colon and rectum cancer	3	Rate	1997	28.045420440691746	30.253979460469957	25.336473524997686
1	Deaths	71	Australia	1	Male	27	Age-standardized	441	Colon and rectum cancer	3	Rate	1997	26.38561382526993	28.349490026096003	24.404709138422284
1	Deaths	71	Australia	2	Female	27	Age-standardized	441	Colon and rectum cancer	3	Rate	1997	18.234045127738668	20.17005619589257	15.994010987286915
1	Deaths	71	Australia	3	Both	27	Age-standardized	441	Colon and rectum cancer	3	Rate	1997	21.890466432177856	23.603625475935345	19.79725660505916
1	Deaths	68	Republic of Korea	1	Male	22	All ages	441	Colon and rectum cancer	1	Number	1994	2396.4719819458933	2834.104529872573	2052.8204685958067
1	Deaths	68	Republic of Korea	2	Female	22	All ages	441	Colon and rectum cancer	1	Number	1994	2229.495571943713	2584.096066393456	1845.1473117078442
1	Deaths	68	Republic of Korea	3	Both	22	All ages	441	Colon and rectum cancer	1	Number	1994	4625.967553889601	5126.256367558733	4080.3863292748256
1	Deaths	68	Republic of Korea	1	Male	22	All ages	441	Colon and rectum cancer	3	Rate	1994	10.52967820942957	12.452558985151821	9.019733641322553
1	Deaths	68	Republic of Korea	2	Female	22	All ages	441	Colon and rectum cancer	3	Rate	1994	9.893796739174464	11.467401665708538	8.188180629556545
1	Deaths	68	Republic of Korea	3	Both	22	All ages	441	Colon and rectum cancer	3	Rate	1994	10.213316433197232	11.31786546050189	9.008769790340482
1	Deaths	68	Republic of Korea	1	Male	27	Age-standardized	441	Colon and rectum cancer	3	Rate	1994	19.94287887341882	23.457799199171557	17.222588679408794
1	Deaths	68	Republic of Korea	2	Female	27	Age-standardized	441	Colon and rectum cancer	3	Rate	1994	12.254280523262715	14.290462275904444	10.075208865345184
1	Deaths	68	Republic of Korea	3	Both	27	Age-standardized	441	Colon and rectum cancer	3	Rate	1994	14.916980300616574	16.641176823947156	13.09539351247687
1	Deaths	67	Japan	1	Male	22	All ages	441	Colon and rectum cancer	1	Number	1997	20937.322058883416	21627.703228876457	19993.776044000955
1	Deaths	67	Japan	2	Female	22	All ages	441	Colon and rectum cancer	1	Number	1997	17555.49689686131	18841.582443351086	15164.6252772887
1	Deaths	67	Japan	3	Both	22	All ages	441	Colon and rectum cancer	1	Number	1997	38492.818955744726	40426.75976357633	35304.352327962166
1	Deaths	67	Japan	1	Male	22	All ages	441	Colon and rectum cancer	3	Rate	1997	33.28293260376803	34.380394346352254	31.783028349844482
1	Deaths	67	Japan	2	Female	22	All ages	441	Colon and rectum cancer	3	Rate	1997	26.873155620423358	28.841836839476528	23.213318164457334
1	Deaths	67	Japan	3	Both	22	All ages	441	Colon and rectum cancer	3	Rate	1997	30.01755793744135	31.525688072400033	27.5311206141292
1	Deaths	67	Japan	1	Male	27	Age-standardized	441	Colon and rectum cancer	3	Rate	1997	23.93271268313887	24.78522766661838	22.738904216105308
1	Deaths	67	Japan	2	Female	27	Age-standardized	441	Colon and rectum cancer	3	Rate	1997	14.263907551969853	15.232579118166102	12.520189555089084
1	Deaths	67	Japan	3	Both	27	Age-standardized	441	Colon and rectum cancer	3	Rate	1997	18.320131793290535	19.243532730277455	16.810268177579847
1	Deaths	6	China	1	Male	22	All ages	441	Colon and rectum cancer	1	Number	2010	120884.87068648785	137259.09597377686	105874.71633217408
1	Deaths	6	China	2	Female	22	All ages	441	Colon and rectum cancer	1	Number	2010	72026.66462393357	81866.26887361205	62356.297597728175
1	Deaths	6	China	3	Both	22	All ages	441	Colon and rectum cancer	1	Number	2010	192911.53531042163	212578.7812260604	175402
1	Deaths	6	China	1	Male	22	All ages	441	Colon and rectum cancer	3	Rate	2010	17.690931418547116	20.087222161501504	15.49426603142309
1	Deaths	6	China	2	Female	22	All ages	441	Colon and rectum cancer	3	Rate	2010	11.019616181498469	12.525012311881946	9.540112257231062
1	Deaths	6	China	3	Both	22	All ages	441	Colon and rectum cancer	3	Rate	2010	14.429358300659356	15.90042501342635	13.119657973162003
1	Deaths	6	China	1	Male	27	Age-standardized	441	Colon and rectum cancer	3	Rate	2010	19.012368081981176	21.453085445464133	16.786313668363594
1	Deaths	6	China	2	Female	27	Age-standardized	441	Colon and rectum cancer	3	Rate	2010	10.029294167153079	11.358312453257867	8.715183124731201
1	Deaths	6	China	3	Both	27	Age-standardized	441	Colon and rectum cancer	3	Rate	2010	14.003281809358482	15.303721738254334	12.739561435672696
1	Deaths	67	Japan	1	Male	22	All ages	441	Colon and rectum cancer	1	Number	1994	19531.121965690338	20100.721065887465	18767.262026690038
1	Deaths	67	Japan	2	Female	22	All ages	441	Colon and rectum cancer	1	Number	1994	16606.75003873894	17665.71525608667	14731.328652531209
1	Deaths	67	Japan	3	Both	22	All ages	441	Colon and rectum cancer	1	Number	1994	36137.87200442929	37718.925335520085	33542.37442394369
1	Deaths	67	Japan	1	Male	22	All ages	441	Colon and rectum cancer	3	Rate	1994	31.24080876505886	32.151905249596055	30.01898431895082
1	Deaths	67	Japan	2	Female	22	All ages	441	Colon and rectum cancer	3	Rate	1994	25.63384057341075	27.268437679464377	22.738978381237665
1	Deaths	67	Japan	3	Both	22	All ages	441	Colon and rectum cancer	3	Rate	1994	28.3874112641241	29.629377341559056	26.348567990694686
1	Deaths	67	Japan	1	Male	27	Age-standardized	441	Colon and rectum cancer	3	Rate	1994	24.620783397832245	25.400519880902166	23.49472176656736
1	Deaths	67	Japan	2	Female	27	Age-standardized	441	Colon and rectum cancer	3	Rate	1994	15.02610265258988	15.953049777790614	13.40603544691362
1	Deaths	67	Japan	3	Both	27	Age-standardized	441	Colon and rectum cancer	3	Rate	1994	19.062221787034385	19.93740655518912	17.633243649879212
1	Deaths	71	Australia	1	Male	22	All ages	441	Colon and rectum cancer	1	Number	1994	2594.714342840468	2795.556872773152	2417.0246393934913
1	Deaths	71	Australia	2	Female	22	All ages	441	Colon and rectum cancer	1	Number	1994	2398.5265377591427	2637.254984516144	2109.3266969792344
1	Deaths	71	Australia	3	Both	22	All ages	441	Colon and rectum cancer	1	Number	1994	4993.240880599612	5407.294188500375	4518.235243614358
1	Deaths	71	Australia	1	Male	22	All ages	441	Colon and rectum cancer	3	Rate	1994	29.557619713956655	31.845512074254202	27.533472163354997
1	Deaths	71	Australia	2	Female	22	All ages	441	Colon and rectum cancer	3	Rate	1994	26.88510311477556	29.561012180800933	23.643459790116495
1	Deaths	71	Australia	3	Both	22	All ages	441	Colon and rectum cancer	3	Rate	1994	28.210573100956168	30.54987164263292	25.526909010645074
1	Deaths	71	Australia	1	Male	27	Age-standardized	441	Colon and rectum cancer	3	Rate	1994	27.809074843535605	30.009413506265837	25.71815548436185
1	Deaths	71	Australia	2	Female	27	Age-standardized	441	Colon and rectum cancer	3	Rate	1994	19.517725596904675	21.4343435129274	17.28852037492404
1	Deaths	71	Australia	3	Both	27	Age-standardized	441	Colon and rectum cancer	3	Rate	1994	23.202629164030665	25.173315133443655	20.983753781701562
1	Deaths	67	Japan	1	Male	22	All ages	441	Colon and rectum cancer	1	Number	1995	20057.9303866853	20683.643758338454	19224.27895131408
1	Deaths	67	Japan	2	Female	22	All ages	441	Colon and rectum cancer	1	Number	1995	16826.63231144179	17956.459189633224	14800.05053069592
1	Deaths	67	Japan	3	Both	22	All ages	441	Colon and rectum cancer	1	Number	1995	36884.5626981271	38577.37905701902	34245.89597387629
1	Deaths	67	Japan	1	Male	22	All ages	441	Colon and rectum cancer	3	Rate	1995	32.01135679930837	33.00996102257278	30.680894830927105
1	Deaths	67	Japan	2	Female	22	All ages	441	Colon and rectum cancer	3	Rate	1995	25.898336242450686	27.63728411066215	22.779168044730437
1	Deaths	67	Japan	3	Both	22	All ages	441	Colon and rectum cancer	3	Rate	1995	28.89945289060697	30.225792774764788	26.83202903863948
1	Deaths	67	Japan	1	Male	27	Age-standardized	441	Colon and rectum cancer	3	Rate	1995	24.539357518135187	25.354587606166184	23.340333806400118
1	Deaths	67	Japan	2	Female	27	Age-standardized	441	Colon and rectum cancer	3	Rate	1995	14.684918980183733	15.630987970686213	13.03025560882962
1	Deaths	67	Japan	3	Both	27	Age-standardized	441	Colon and rectum cancer	3	Rate	1995	18.80663472741793	19.686141401844505	17.425955574966164
1	Deaths	67	Japan	1	Male	22	All ages	441	Colon and rectum cancer	1	Number	1998	21830.281929348454	22561.202343179793	20797.48983204084
1	Deaths	67	Japan	2	Female	22	All ages	441	Colon and rectum cancer	1	Number	1998	18257.912458111037	19703.105728413364	15670.465882571838
1	Deaths	67	Japan	3	Both	22	All ages	441	Colon and rectum cancer	1	Number	1998	40088.19438745945	42191.61145439689	36702.16182065403
1	Deaths	67	Japan	1	Male	22	All ages	441	Colon and rectum cancer	3	Rate	1998	34.64232744420724	35.80222012876115	33.003396617179305
1	Deaths	67	Japan	2	Female	22	All ages	441	Colon and rectum cancer	3	Rate	1998	27.87629712288667	30.082827420113826	23.925767198131545
1	Deaths	67	Japan	3	Both	22	All ages	441	Colon and rectum cancer	3	Rate	1998	31.194028249299695	32.83077074690214	28.55923770420542
1	Deaths	67	Japan	1	Male	27	Age-standardized	441	Colon and rectum cancer	3	Rate	1998	24.120578721432594	25.000601878795408	22.89671709243868
1	Deaths	67	Japan	2	Female	27	Age-standardized	441	Colon and rectum cancer	3	Rate	1998	14.259661298250489	15.283258540264342	12.456722275780484
1	Deaths	67	Japan	3	Both	27	Age-standardized	441	Colon and rectum cancer	3	Rate	1998	18.4204858050098	19.373534069232363	16.8946465347274
1	Deaths	68	Republic of Korea	1	Male	22	All ages	441	Colon and rectum cancer	1	Number	1991	2040.3945418673109	2484.5011102953054	1706.577243037934
1	Deaths	68	Republic of Korea	2	Female	22	All ages	441	Colon and rectum cancer	1	Number	1991	1988.6557356946048	2334.5080216029687	1612.9158197414467
1	Deaths	68	Republic of Korea	3	Both	22	All ages	441	Colon and rectum cancer	1	Number	1991	4029.050277561916	4515.636410527833	3492.3009680931273
1	Deaths	68	Republic of Korea	1	Male	22	All ages	441	Colon and rectum cancer	3	Rate	1991	9.107678264343532	11.090030038634296	7.617623035109396
1	Deaths	68	Republic of Korea	2	Female	22	All ages	441	Colon and rectum cancer	3	Rate	1991	8.96073656354351	10.51912154104275	7.267680122033171
1	Deaths	68	Republic of Korea	3	Both	22	All ages	441	Colon and rectum cancer	3	Rate	1991	9.034553418592017	10.125651346932303	7.8309719354335074
1	Deaths	68	Republic of Korea	1	Male	27	Age-standardized	441	Colon and rectum cancer	3	Rate	1991	18.79034000263554	22.600510608691017	15.985420588454517
1	Deaths	68	Republic of Korea	2	Female	27	Age-standardized	441	Colon and rectum cancer	3	Rate	1991	12.105331525487337	14.367520810058267	9.776024011094947
1	Deaths	68	Republic of Korea	3	Both	27	Age-standardized	441	Colon and rectum cancer	3	Rate	1991	14.422670398422119	16.243105203320017	12.47159438772601
1	Deaths	68	Republic of Korea	1	Male	22	All ages	441	Colon and rectum cancer	1	Number	1997	2685.0089184859025	3180.2352226092526	2302.216672245516
1	Deaths	68	Republic of Korea	2	Female	22	All ages	441	Colon and rectum cancer	1	Number	1997	2444.954610350628	2800.1017498520464	2060.9954839961097
1	Deaths	68	Republic of Korea	3	Both	22	All ages	441	Colon and rectum cancer	1	Number	1997	5129.9635288365325	5689.1375876813145	4560.5301420091855
1	Deaths	68	Republic of Korea	1	Male	22	All ages	441	Colon and rectum cancer	3	Rate	1997	11.619639126822651	13.762779471871635	9.963068181662692
1	Deaths	68	Republic of Korea	2	Female	22	All ages	441	Colon and rectum cancer	3	Rate	1997	10.687267865087255	12.239669940488902	9.008924220087167
1	Deaths	68	Republic of Korea	3	Both	22	All ages	441	Colon and rectum cancer	3	Rate	1997	11.155787646958084	12.37178597191592	9.917479049474785
1	Deaths	68	Republic of Korea	1	Male	27	Age-standardized	441	Colon and rectum cancer	3	Rate	1997	19.631895376153963	22.904285064825118	16.972973134250356
1	Deaths	68	Republic of Korea	2	Female	27	Age-standardized	441	Colon and rectum cancer	3	Rate	1997	12.076278935719387	13.93072899718474	10.102663331781041
1	Deaths	68	Republic of Korea	3	Both	27	Age-standardized	441	Colon and rectum cancer	3	Rate	1997	14.82732284875969	16.47967242756366	13.15867409891983
1	Deaths	68	Republic of Korea	1	Male	22	All ages	441	Colon and rectum cancer	1	Number	1992	2115.2556312964207	2547.3453134033057	1782.319801969948
1	Deaths	68	Republic of Korea	2	Female	22	All ages	441	Colon and rectum cancer	1	Number	1992	2070.1010417063217	2447.740137527363	1695.4857535287535
1	Deaths	68	Republic of Korea	3	Both	22	All ages	441	Colon and rectum cancer	1	Number	1992	4185.356673002743	4684.663799991372	3655.865203541042
1	Deaths	68	Republic of Korea	1	Male	22	All ages	441	Colon and rectum cancer	3	Rate	1992	9.383013511171688	11.299710134152384	7.906151169475034
1	Deaths	68	Republic of Korea	2	Female	22	All ages	441	Colon and rectum cancer	3	Rate	1992	9.272561801438883	10.964112978937811	7.5945551044676405
1	Deaths	68	Republic of Korea	3	Both	22	All ages	441	Colon and rectum cancer	3	Rate	1992	9.328056520335023	10.440880459952684	8.147959639695575
1	Deaths	68	Republic of Korea	1	Male	27	Age-standardized	441	Colon and rectum cancer	3	Rate	1992	18.897506199190826	22.388132303264353	16.1269389241548
1	Deaths	68	Republic of Korea	2	Female	27	Age-standardized	441	Colon and rectum cancer	3	Rate	1992	12.20142991321067	14.47444591160365	9.863061216016908
1	Deaths	68	Republic of Korea	3	Both	27	Age-standardized	441	Colon and rectum cancer	3	Rate	1992	14.503971284528399	16.259415251475758	12.656251836523714
1	Deaths	68	Republic of Korea	1	Male	22	All ages	441	Colon and rectum cancer	1	Number	1990	1915.2425062322811	2363.1553197354287	1588.5153595296601
1	Deaths	68	Republic of Korea	2	Female	22	All ages	441	Colon and rectum cancer	1	Number	1990	1885.1514386366498	2260.5641395864236	1525.1139592659038
1	Deaths	68	Republic of Korea	3	Both	22	All ages	441	Colon and rectum cancer	1	Number	1990	3800.393944868928	4331.93494906926	3301.763895037726
1	Deaths	68	Republic of Korea	1	Male	22	All ages	441	Colon and rectum cancer	3	Rate	1990	8.619583048872814	10.63542265251642	7.1491416994560755
1	Deaths	68	Republic of Korea	2	Female	22	All ages	441	Colon and rectum cancer	3	Rate	1990	8.558897675542552	10.263333100556437	6.924268286020916
1	Deaths	68	Republic of Korea	3	Both	22	All ages	441	Colon and rectum cancer	3	Rate	1990	8.589373425954083	9.790723665564764	7.4624061268968775
1	Deaths	68	Republic of Korea	1	Male	27	Age-standardized	441	Colon and rectum cancer	3	Rate	1990	18.26949600277833	22.22387247706543	15.414867103321974
1	Deaths	68	Republic of Korea	2	Female	27	Age-standardized	441	Colon and rectum cancer	3	Rate	1990	11.91206386988176	14.339964622650268	9.521026383723784
1	Deaths	68	Republic of Korea	3	Both	27	Age-standardized	441	Colon and rectum cancer	3	Rate	1990	14.12407189383542	15.988702661991699	12.176082048840923
1	Deaths	68	Republic of Korea	1	Male	22	All ages	441	Colon and rectum cancer	1	Number	1995	2478.300939866898	2898.418350956392	2110.4561251412256
1	Deaths	68	Republic of Korea	2	Female	22	All ages	441	Colon and rectum cancer	1	Number	1995	2300.7366851500165	2654.2531648521467	1917.3064501077793
1	Deaths	68	Republic of Korea	3	Both	22	All ages	441	Colon and rectum cancer	1	Number	1995	4779.037625016915	5301.7746576723075	4223.961871766405
1	Deaths	68	Republic of Korea	1	Male	22	All ages	441	Colon and rectum cancer	3	Rate	1995	10.841307077376248	12.679107236713696	9.232172960889265
1	Deaths	68	Republic of Korea	2	Female	22	All ages	441	Colon and rectum cancer	3	Rate	1995	10.165187707815559	11.727105417552949	8.471104096590812
1	Deaths	68	Republic of Korea	3	Both	22	All ages	441	Colon and rectum cancer	3	Rate	1995	10.504929089775143	11.653971196474387	9.284802385430673
1	Deaths	68	Republic of Korea	1	Male	27	Age-standardized	441	Colon and rectum cancer	3	Rate	1995	19.647212224862805	22.976362461705488	16.828989584339812
1	Deaths	68	Republic of Korea	2	Female	27	Age-standardized	441	Colon and rectum cancer	3	Rate	1995	12.215214294838045	14.194891112094293	10.075434094377226
1	Deaths	68	Republic of Korea	3	Both	27	Age-standardized	441	Colon and rectum cancer	3	Rate	1995	14.852684790460634	16.519640585841778	13.087825046782894
1	Deaths	67	Japan	1	Male	22	All ages	441	Colon and rectum cancer	1	Number	1999	22484.37891171249	23243.37281605085	21448.587888395552
1	Deaths	67	Japan	2	Female	22	All ages	441	Colon and rectum cancer	1	Number	1999	18917.302651664562	20436.847647204097	16187.918111526342
1	Deaths	67	Japan	3	Both	22	All ages	441	Colon and rectum cancer	1	Number	1999	41401.68156337707	43571.93241757147	37742.31544897986
1	Deaths	67	Japan	1	Male	22	All ages	441	Colon and rectum cancer	3	Rate	1999	35.62933164476453	36.832053127097325	33.98799024817367
1	Deaths	67	Japan	2	Female	22	All ages	441	Colon and rectum cancer	3	Rate	1999	28.814698229593592	31.129258148573804	24.65731948883106
1	Deaths	67	Japan	3	Both	22	All ages	441	Colon and rectum cancer	3	Rate	1999	32.1546614030023	33.840189109633606	29.312610696005272
1	Deaths	67	Japan	1	Male	27	Age-standardized	441	Colon and rectum cancer	3	Rate	1999	24.085902610244325	24.926663206075936	22.86863055839571
1	Deaths	67	Japan	2	Female	27	Age-standardized	441	Colon and rectum cancer	3	Rate	1999	14.234080248802508	15.257645094727428	12.44206332314015
1	Deaths	67	Japan	3	Both	27	Age-standardized	441	Colon and rectum cancer	3	Rate	1999	18.400286447853592	19.350673049351023	16.82594934665822
1	Deaths	71	Australia	1	Male	22	All ages	441	Colon and rectum cancer	1	Number	1999	2705.4099979598236	2910.818879090009	2507.650555766367
1	Deaths	71	Australia	2	Female	22	All ages	441	Colon and rectum cancer	1	Number	1999	2489.03131571156	2761.6834827624516	2161.984955413748
1	Deaths	71	Australia	3	Both	22	All ages	441	Colon and rectum cancer	1	Number	1999	5194.441313671385	5635.936127918573	4706.475359564649
1	Deaths	71	Australia	1	Male	22	All ages	441	Colon and rectum cancer	3	Rate	1999	29.28663242666525	31.510226781446484	27.145844857760785
1	Deaths	71	Australia	2	Female	22	All ages	441	Colon and rectum cancer	3	Rate	1999	26.38283325178296	29.27284777817094	22.916259916656806
1	Deaths	71	Australia	3	Both	22	All ages	441	Colon and rectum cancer	3	Rate	1999	27.81944651925202	30.18392435850515	25.206086978975804
1	Deaths	71	Australia	1	Male	27	Age-standardized	441	Colon and rectum cancer	3	Rate	1999	25.09065159035521	27.048520847891734	23.175127995961954
1	Deaths	71	Australia	2	Female	27	Age-standardized	441	Colon and rectum cancer	3	Rate	1999	17.50102909266973	19.36295113466193	15.337588390873876
1	Deaths	71	Australia	3	Both	27	Age-standardized	441	Colon and rectum cancer	3	Rate	1999	20.938288710454135	22.723504961378037	19.0057422772055
1	Deaths	67	Japan	1	Male	22	All ages	441	Colon and rectum cancer	1	Number	2000	22842.776694267395	23667.331481477064	21719.460082221834
1	Deaths	67	Japan	2	Female	22	All ages	441	Colon and rectum cancer	1	Number	2000	19246.97299838583	20869.6471688356	16275.670543677446
1	Deaths	67	Japan	3	Both	22	All ages	441	Colon and rectum cancer	1	Number	2000	42089.74969265319	44538.58245302135	38038.52049199872
1	Deaths	67	Japan	1	Male	22	All ages	441	Colon and rectum cancer	3	Rate	2000	36.15022662520243	37.45513989478783	34.372502724084384
1	Deaths	67	Japan	2	Female	22	All ages	441	Colon and rectum cancer	3	Rate	2000	29.250732430249872	31.71680374366036	24.735073106609352
1	Deaths	67	Japan	3	Both	22	All ages	441	Colon and rectum cancer	3	Rate	2000	32.630636081528046	34.52912612272792	29.489866970409047
1	Deaths	67	Japan	1	Male	27	Age-standardized	441	Colon and rectum cancer	3	Rate	2000	23.703462528466876	24.564558247409728	22.397301204242844
1	Deaths	67	Japan	2	Female	27	Age-standardized	441	Colon and rectum cancer	3	Rate	2000	13.9533526749813	15.007199818892994	12.089339916783716
1	Deaths	67	Japan	3	Both	27	Age-standardized	441	Colon and rectum cancer	3	Rate	2000	18.07816775977904	19.085279277829407	16.419298854748796
1	Deaths	68	Republic of Korea	1	Male	22	All ages	441	Colon and rectum cancer	1	Number	1998	2797.7353132508283	3312.8975061692904	2416.8234194190836
1	Deaths	68	Republic of Korea	2	Female	22	All ages	441	Colon and rectum cancer	1	Number	1998	2532.7550390653514	2909.319793573919	2141.526113561567
1	Deaths	68	Republic of Korea	3	Both	22	All ages	441	Colon and rectum cancer	1	Number	1998	5330.490352316178	5960.034983050583	4760.05106110022
1	Deaths	68	Republic of Korea	1	Male	22	All ages	441	Colon and rectum cancer	3	Rate	1998	12.03849402600403	14.255207291372187	10.399452070673705
1	Deaths	68	Republic of Korea	2	Female	22	All ages	441	Colon and rectum cancer	3	Rate	1998	11.00618249136368	12.642558826228802	9.30608244869089
1	Deaths	68	Republic of Korea	3	Both	22	All ages	441	Colon and rectum cancer	3	Rate	1998	11.524880414480984	12.885998455270615	10.291552112493047
1	Deaths	68	Republic of Korea	1	Male	27	Age-standardized	441	Colon and rectum cancer	3	Rate	1998	19.842414900244933	23.191250799793025	17.270472842832433
1	Deaths	68	Republic of Korea	2	Female	27	Age-standardized	441	Colon and rectum cancer	3	Rate	1998	12.128334136607625	13.92488593020632	10.18795503526346
1	Deaths	68	Republic of Korea	3	Both	27	Age-standardized	441	Colon and rectum cancer	3	Rate	1998	14.950422675177958	16.72703453585152	13.286528355093251
1	Deaths	68	Republic of Korea	1	Male	22	All ages	441	Colon and rectum cancer	1	Number	1999	2932.2791496685422	3462.907192321253	2525.865513939038
1	Deaths	68	Republic of Korea	2	Female	22	All ages	441	Colon and rectum cancer	1	Number	1999	2656.9023357688234	3086.7959041265854	2255.74037915558
1	Deaths	68	Republic of Korea	3	Both	22	All ages	441	Colon and rectum cancer	1	Number	1999	5589.181485437368	6251.0932640463825	4976.032985321082
1	Deaths	68	Republic of Korea	1	Male	22	All ages	441	Colon and rectum cancer	3	Rate	1999	12.546355769747073	14.816756323281671	10.80743194862481
1	Deaths	68	Republic of Korea	2	Female	22	All ages	441	Colon and rectum cancer	3	Rate	1999	11.475940073636995	13.332776421024999	9.743203980202688
1	Deaths	68	Republic of Korea	3	Both	22	All ages	441	Colon and rectum cancer	3	Rate	1999	12.013674487614752	13.436421748272819	10.695741528708542
1	Deaths	68	Republic of Korea	1	Male	27	Age-standardized	441	Colon and rectum cancer	3	Rate	1999	20.214427746471817	23.631493711070938	17.7042480823879
1	Deaths	68	Republic of Korea	2	Female	27	Age-standardized	441	Colon and rectum cancer	3	Rate	1999	12.341879299056206	14.416790135133283	10.395672149259715
1	Deaths	68	Republic of Korea	3	Both	27	Age-standardized	441	Colon and rectum cancer	3	Rate	1999	15.223420739526466	17.13583390040148	13.473940059401489
1	Deaths	67	Japan	1	Male	22	All ages	441	Colon and rectum cancer	1	Number	1991	17613.516716636608	18156.251051165436	16946.233198906506
1	Deaths	67	Japan	2	Female	22	All ages	441	Colon and rectum cancer	1	Number	1991	15225.435678741665	16083.033688007275	13639.26085260086
1	Deaths	67	Japan	3	Both	22	All ages	441	Colon and rectum cancer	1	Number	1991	32838.95239537826	34120.5989444503	30788.868801753095
1	Deaths	67	Japan	1	Male	22	All ages	441	Colon and rectum cancer	3	Rate	1991	28.3916097311395	29.266454979906722	27.316000951802373
1	Deaths	67	Japan	2	Female	22	All ages	441	Colon and rectum cancer	3	Rate	1991	23.722107276063625	25.05829445683129	21.25075537663386
1	Deaths	67	Japan	3	Both	22	All ages	441	Colon and rectum cancer	3	Rate	1991	26.017186626565195	27.032591657000708	24.392975025256227
1	Deaths	67	Japan	1	Male	27	Age-standardized	441	Colon and rectum cancer	3	Rate	1991	24.599468717187197	25.419068916765383	23.544127009898386
1	Deaths	67	Japan	2	Female	27	Age-standardized	441	Colon and rectum cancer	3	Rate	1991	15.40322526001755	16.277232054628378	13.80100737869106
1	Deaths	67	Japan	3	Both	27	Age-standardized	441	Colon and rectum cancer	3	Rate	1991	19.21900910643703	20.036650302793674	17.910384851514078
1	Deaths	71	Australia	1	Male	22	All ages	441	Colon and rectum cancer	1	Number	2003	2766.761996801849	2968.443046527902	2545.774206873244
1	Deaths	71	Australia	2	Female	22	All ages	441	Colon and rectum cancer	1	Number	2003	2545.131955242026	2826.391014075402	2166.7206050811706
1	Deaths	71	Australia	3	Both	22	All ages	441	Colon and rectum cancer	1	Number	2003	5311.893952043875	5796.2116553898895	4716.961215871163
1	Deaths	71	Australia	1	Male	22	All ages	441	Colon and rectum cancer	3	Rate	2003	28.60179569614748	30.686702235530657	26.317302983659978
1	Deaths	71	Australia	2	Female	22	All ages	441	Colon and rectum cancer	3	Rate	2003	25.71432519034678	28.555980172783453	21.89110789361172
1	Deaths	71	Australia	3	Both	22	All ages	441	Colon and rectum cancer	3	Rate	2003	27.14151157264431	29.616168384108786	24.101659141561125
1	Deaths	71	Australia	1	Male	27	Age-standardized	441	Colon and rectum cancer	3	Rate	2003	22.641961571527236	24.31606615376851	20.798530472086313
1	Deaths	71	Australia	2	Female	27	Age-standardized	441	Colon and rectum cancer	3	Rate	2003	15.889748642989302	17.58329283126031	13.75019696845437
1	Deaths	71	Australia	3	Both	27	Age-standardized	441	Colon and rectum cancer	3	Rate	2003	19.00340687126749	20.68079449039573	16.964770625285734
1	Deaths	68	Republic of Korea	1	Male	22	All ages	441	Colon and rectum cancer	1	Number	2000	3053.1441283145437	3607.5554108917895	2630.2227236189306
1	Deaths	68	Republic of Korea	2	Female	22	All ages	441	Colon and rectum cancer	1	Number	2000	2756.639681828724	3236.236055241112	2349.713542714976
1	Deaths	68	Republic of Korea	3	Both	22	All ages	441	Colon and rectum cancer	1	Number	2000	5809.783810143273	6550.561195507252	5156.303233591075
1	Deaths	68	Republic of Korea	1	Male	22	All ages	441	Colon and rectum cancer	3	Rate	2000	12.99459307413965	15.35424224562511	11.19458255206944
1	Deaths	68	Republic of Korea	2	Female	22	All ages	441	Colon and rectum cancer	3	Rate	2000	11.835835813758697	13.8950182197877	10.088668419113203
1	Deaths	68	Republic of Korea	3	Both	22	All ages	441	Colon and rectum cancer	3	Rate	2000	12.417751526496476	14.001078859922817	11.021011184308648
1	Deaths	68	Republic of Korea	1	Male	27	Age-standardized	441	Colon and rectum cancer	3	Rate	2000	20.307102418106385	23.6632379416426	17.72173246315582
1	Deaths	68	Republic of Korea	2	Female	27	Age-standardized	441	Colon and rectum cancer	3	Rate	2000	12.373543683382346	14.594109038688378	10.33890791672312
1	Deaths	68	Republic of Korea	3	Both	27	Age-standardized	441	Colon and rectum cancer	3	Rate	2000	15.290297734580252	17.214230734215086	13.515033923004099
1	Deaths	6	China	1	Male	22	All ages	441	Colon and rectum cancer	1	Number	2011	125772.80030679762	142968.00006015392	109442.024059169
1	Deaths	6	China	2	Female	22	All ages	441	Colon and rectum cancer	1	Number	2011	73579.66112305863	84501.2246981996	63177.002847569995
1	Deaths	6	China	3	Both	22	All ages	441	Colon and rectum cancer	1	Number	2011	199352.4614298562	220053.37608275155	180081.787749707
1	Deaths	6	China	1	Male	22	All ages	441	Colon and rectum cancer	3	Rate	2011	18.32134839181135	20.826176499156926	15.9424410254199
1	Deaths	6	China	2	Female	22	All ages	441	Colon and rectum cancer	3	Rate	2011	11.192854363539913	12.854230192850267	9.610413818231017
1	Deaths	6	China	3	Both	22	All ages	441	Colon and rectum cancer	3	Rate	2011	14.834285688110178	16.374689452195575	13.400309519853733
1	Deaths	6	China	1	Male	27	Age-standardized	441	Colon and rectum cancer	3	Rate	2011	19.055543281888287	21.48123566952139	16.756927518388803
1	Deaths	6	China	2	Female	27	Age-standardized	441	Colon and rectum cancer	3	Rate	2011	9.892202852263809	11.331797926288509	8.526882648391826
1	Deaths	6	China	3	Both	27	Age-standardized	441	Colon and rectum cancer	3	Rate	2011	13.969786048640154	15.333579921273454	12.64750975591918
1	Deaths	68	Republic of Korea	1	Male	22	All ages	441	Colon and rectum cancer	1	Number	2001	3137.4543989169015	3660.4840909834966	2702.728745216678
1	Deaths	68	Republic of Korea	2	Female	22	All ages	441	Colon and rectum cancer	1	Number	2001	2812.374247503658	3300.4609804491447	2344.814169494602
1	Deaths	68	Republic of Korea	3	Both	22	All ages	441	Colon and rectum cancer	1	Number	2001	5949.828646420562	6665.880702500088	5260.1760714806815
1	Deaths	68	Republic of Korea	1	Male	22	All ages	441	Colon and rectum cancer	3	Rate	2001	13.294665857039334	15.510954639351537	11.452557073745904
1	Deaths	68	Republic of Korea	2	Female	22	All ages	441	Colon and rectum cancer	3	Rate	2001	12.007455612759516	14.091346043139435	10.011203909069867
1	Deaths	68	Republic of Korea	3	Both	22	All ages	441	Colon and rectum cancer	3	Rate	2001	12.653489554630108	14.176316135127454	11.186806701742341
1	Deaths	68	Republic of Korea	1	Male	27	Age-standardized	441	Colon and rectum cancer	3	Rate	2001	19.964528647136248	23.0493756191285	17.37748335672356
1	Deaths	68	Republic of Korea	2	Female	27	Age-standardized	441	Colon and rectum cancer	3	Rate	2001	12.148168547219319	14.339740177406275	10.047295480972798
1	Deaths	68	Republic of Korea	3	Both	27	Age-standardized	441	Colon and rectum cancer	3	Rate	2001	15.053700862172509	16.798180087303027	13.24030377460673
1	Deaths	67	Japan	1	Male	22	All ages	441	Colon and rectum cancer	1	Number	2001	23255.480028819038	24158.026726831587	22073.242044436753
1	Deaths	67	Japan	2	Female	22	All ages	441	Colon and rectum cancer	1	Number	2001	19718.525365375164	21520.20088750774	16476.890401784283
1	Deaths	67	Japan	3	Both	22	All ages	441	Colon and rectum cancer	1	Number	2001	42974.00539419424	45632.81309829364	38554.43419924367
1	Deaths	67	Japan	1	Male	22	All ages	441	Colon and rectum cancer	3	Rate	2001	36.75848754194031	38.18508684299971	34.889797660386776
1	Deaths	67	Japan	2	Female	22	All ages	441	Colon and rectum cancer	3	Rate	2001	29.90208000068824	32.63422373861146	24.986315448409382
1	Deaths	67	Japan	3	Both	22	All ages	441	Colon and rectum cancer	3	Rate	2001	33.25922921690907	35.31698236472885	29.83875374423724
1	Deaths	67	Japan	1	Male	27	Age-standardized	441	Colon and rectum cancer	3	Rate	2001	23.347310401919675	24.2763557664393	21.999850230294058
1	Deaths	67	Japan	2	Female	27	Age-standardized	441	Colon and rectum cancer	3	Rate	2001	13.778331887631632	14.849346737072903	11.846788150158302
1	Deaths	67	Japan	3	Both	27	Age-standardized	441	Colon and rectum cancer	3	Rate	2001	17.855277408524245	18.902168923027126	16.132599818181614
1	Deaths	6	China	1	Male	22	All ages	441	Colon and rectum cancer	1	Number	2012	130290.62235675831	150103.63903934337	113364.39162108628
1	Deaths	6	China	2	Female	22	All ages	441	Colon and rectum cancer	1	Number	2012	73612.23152688418	84935.93757653833	63137.17636821594
1	Deaths	6	China	3	Both	22	All ages	441	Colon and rectum cancer	1	Number	2012	203902.85388364253	227007.950506793	183610.77669160956
1	Deaths	6	China	1	Male	22	All ages	441	Colon and rectum cancer	3	Rate	2012	18.88387873221597	21.755509841082954	16.430648539403418
1	Deaths	6	China	2	Female	22	All ages	441	Colon and rectum cancer	3	Rate	2012	11.132554025615178	12.845065204167357	9.54838635325513
1	Deaths	6	China	3	Both	22	All ages	441	Colon and rectum cancer	3	Rate	2012	15.09060314613099	16.800583350684413	13.588811101129169
1	Deaths	6	China	1	Male	27	Age-standardized	441	Colon and rectum cancer	3	Rate	2012	18.980653929750762	21.681304372068087	16.66754060308428
1	Deaths	6	China	2	Female	27	Age-standardized	441	Colon and rectum cancer	3	Rate	2012	9.518785943543344	11.0049179196386	8.130632153177727
1	Deaths	6	China	3	Both	27	Age-standardized	441	Colon and rectum cancer	3	Rate	2012	13.743332422960588	15.269129855559287	12.380049270587437
1	Deaths	68	Republic of Korea	1	Male	22	All ages	441	Colon and rectum cancer	1	Number	2003	3445.258681207069	4004.9658396734485	2999.4981725482417
1	Deaths	68	Republic of Korea	2	Female	22	All ages	441	Colon and rectum cancer	1	Number	2003	3024.87980251537	3540.563081131587	2509.798774675354
1	Deaths	68	Republic of Korea	3	Both	22	All ages	441	Colon and rectum cancer	1	Number	2003	6470.138483722427	7163.55239357364	5761.237216489807
1	Deaths	68	Republic of Korea	1	Male	22	All ages	441	Colon and rectum cancer	3	Rate	2003	14.506913678640496	16.863666591703097	12.6299546985401
1	Deaths	68	Republic of Korea	2	Female	22	All ages	441	Colon and rectum cancer	3	Rate	2003	12.780151547278713	14.958919260836252	10.60392835009597
1	Deaths	68	Republic of Korea	3	Both	22	All ages	441	Colon and rectum cancer	3	Rate	2003	13.64499846008313	15.107352280781644	12.149983055996287
1	Deaths	68	Republic of Korea	1	Male	27	Age-standardized	441	Colon and rectum cancer	3	Rate	2003	20.118581180414296	23.06329379842614	17.52611078011517
1	Deaths	68	Republic of Korea	2	Female	27	Age-standardized	441	Colon and rectum cancer	3	Rate	2003	12.0278160479211	14.162326552265178	9.933160684469375
1	Deaths	68	Republic of Korea	3	Both	27	Age-standardized	441	Colon and rectum cancer	3	Rate	2003	15.052809163825547	16.662032299264027	13.244977061759293
1	Deaths	67	Japan	1	Male	22	All ages	441	Colon and rectum cancer	1	Number	2003	24405.61555255673	25384.19179671465	22937.998443867535
1	Deaths	67	Japan	2	Female	22	All ages	441	Colon and rectum cancer	1	Number	2003	20960.911699473905	22994.808382557458	17273.041778731436
1	Deaths	67	Japan	3	Both	22	All ages	441	Colon and rectum cancer	1	Number	2003	45366.527252030646	48380.06715574749	40250.501300649354
1	Deaths	67	Japan	1	Male	22	All ages	441	Colon and rectum cancer	3	Rate	2003	38.505627860982855	40.0495632151229	36.190114937004246
1	Deaths	67	Japan	2	Female	22	All ages	441	Colon and rectum cancer	3	Rate	2003	31.665267130640597	34.73783776637208	26.09406928115507
1	Deaths	67	Japan	3	Both	22	All ages	441	Colon and rectum cancer	3	Rate	2003	35.01118976785608	37.3368607819916	31.062944965118394
1	Deaths	67	Japan	1	Male	27	Age-standardized	441	Colon and rectum cancer	3	Rate	2003	22.929845055580703	23.884191191980687	21.450117040527687
1	Deaths	67	Japan	2	Female	27	Age-standardized	441	Colon and rectum cancer	3	Rate	2003	13.58233630263627	14.700225502729555	11.599086931815618
1	Deaths	67	Japan	3	Both	27	Age-standardized	441	Colon and rectum cancer	3	Rate	2003	17.567682423102944	18.64534526536497	15.772368662997748
1	Deaths	67	Japan	1	Male	22	All ages	441	Colon and rectum cancer	1	Number	2004	25062.623710676733	26064.779413887765	23556.61394587829
1	Deaths	67	Japan	2	Female	22	All ages	441	Colon and rectum cancer	1	Number	2004	21728.66520274854	23893.9623463022	17816.348488037747
1	Deaths	67	Japan	3	Both	22	All ages	441	Colon and rectum cancer	1	Number	2004	46791.288913425306	49923.113836425095	41290.175631557846
1	Deaths	67	Japan	1	Male	22	All ages	441	Colon and rectum cancer	3	Rate	2004	39.52365883116979	41.10405442608706	37.148687366592114
1	Deaths	67	Japan	2	Female	22	All ages	441	Colon and rectum cancer	3	Rate	2004	32.77728164369731	36.043591546045754	26.87562566801412
1	Deaths	67	Japan	3	Both	22	All ages	441	Colon and rectum cancer	3	Rate	2004	36.07556650885224	38.490168904456326	31.83426897930718
1	Deaths	67	Japan	1	Male	27	Age-standardized	441	Colon and rectum cancer	3	Rate	2004	22.82799714766209	23.771769125971666	21.32996964120695
1	Deaths	67	Japan	2	Female	27	Age-standardized	441	Colon and rectum cancer	3	Rate	2004	13.606354281789018	14.714595391224607	11.62408977408311
1	Deaths	67	Japan	3	Both	27	Age-standardized	441	Colon and rectum cancer	3	Rate	2004	17.552075844614777	18.62219603859961	15.713245339368644
1	Deaths	68	Republic of Korea	1	Male	22	All ages	441	Colon and rectum cancer	1	Number	2004	3631.3731605983526	4163.769128986686	3178.7586525977717
1	Deaths	68	Republic of Korea	2	Female	22	All ages	441	Colon and rectum cancer	1	Number	2004	3117.328508373401	3617.2497334502727	2623.429308852377
1	Deaths	68	Republic of Korea	3	Both	22	All ages	441	Colon and rectum cancer	1	Number	2004	6748.701668971746	7478.067921996869	6034.053743392346
1	Deaths	68	Republic of Korea	1	Male	22	All ages	441	Colon and rectum cancer	3	Rate	2004	15.251162638128607	17.487137059561118	13.350257066431316
1	Deaths	68	Republic of Korea	2	Female	22	All ages	441	Colon and rectum cancer	3	Rate	2004	13.102346787417822	15.203550186338967	11.026454377371781
1	Deaths	68	Republic of Korea	3	Both	22	All ages	441	Colon and rectum cancer	3	Rate	2004	14.177168407998854	15.709366556242635	12.675889422746286
1	Deaths	68	Republic of Korea	1	Male	27	Age-standardized	441	Colon and rectum cancer	3	Rate	2004	20.22485665136033	22.994332768612647	17.65049761189617
1	Deaths	68	Republic of Korea	2	Female	27	Age-standardized	441	Colon and rectum cancer	3	Rate	2004	11.90409182255307	13.918862406190772	9.93509997267057
1	Deaths	68	Republic of Korea	3	Both	27	Age-standardized	441	Colon and rectum cancer	3	Rate	2004	15.061199506474857	16.692707039673046	13.37073994888029
1	Deaths	68	Republic of Korea	1	Male	22	All ages	441	Colon and rectum cancer	1	Number	2005	3788.1316553529095	4303.128665404387	3310.6160071875775
1	Deaths	68	Republic of Korea	2	Female	22	All ages	441	Colon and rectum cancer	1	Number	2005	3238.860665543287	3754.0995722796542	2751.1778601586834
1	Deaths	68	Republic of Korea	3	Both	22	All ages	441	Colon and rectum cancer	1	Number	2005	7026.992320896201	7791.892344079952	6313.999110632339
1	Deaths	68	Republic of Korea	1	Male	22	All ages	441	Colon and rectum cancer	3	Rate	2005	15.86553769043368	18.022459681750053	13.865595976941902
1	Deaths	68	Republic of Korea	2	Female	22	All ages	441	Colon and rectum cancer	3	Rate	2005	13.539676733121704	15.693572487809051	11.50097602473486
1	Deaths	68	Republic of Korea	3	Both	22	All ages	441	Colon and rectum cancer	3	Rate	2005	14.701517770257603	16.30180289507075	13.209829452967638
1	Deaths	68	Republic of Korea	1	Male	27	Age-standardized	441	Colon and rectum cancer	3	Rate	2005	20.221001106137173	22.80445867983674	17.557347117532064
1	Deaths	68	Republic of Korea	2	Female	27	Age-standardized	441	Colon and rectum cancer	3	Rate	2005	11.862001351707583	13.81775062806848	9.952375946686843
1	Deaths	68	Republic of Korea	3	Both	27	Age-standardized	441	Colon and rectum cancer	3	Rate	2005	15.055501245412575	16.790192766498638	13.43909691768631
1	Deaths	67	Japan	1	Male	22	All ages	441	Colon and rectum cancer	1	Number	2005	25752.38184248711	26735.947876778733	24154.48895221942
1	Deaths	67	Japan	2	Female	22	All ages	441	Colon and rectum cancer	1	Number	2005	22259.444105734543	24511.19254971766	18243.037283440462
1	Deaths	67	Japan	3	Both	22	All ages	441	Colon and rectum cancer	1	Number	2005	48011.82594822164	51190.94204187731	42385.857327958925
1	Deaths	67	Japan	1	Male	22	All ages	441	Colon and rectum cancer	3	Rate	2005	40.60327804377347	42.15404742149624	38.08391149723257
1	Deaths	67	Japan	2	Female	22	All ages	441	Colon and rectum cancer	3	Rate	2005	33.53861007020363	36.93135036866786	27.48703476327475
1	Deaths	67	Japan	3	Both	22	All ages	441	Colon and rectum cancer	3	Rate	2005	36.99079019170002	39.440145409772654	32.656253423994855
1	Deaths	67	Japan	1	Male	27	Age-standardized	441	Colon and rectum cancer	3	Rate	2005	22.72057629985993	23.608193990679116	21.226715563988513
1	Deaths	67	Japan	2	Female	27	Age-standardized	441	Colon and rectum cancer	3	Rate	2005	13.425160780683866	14.537169662040897	11.455610608831792
1	Deaths	67	Japan	3	Both	27	Age-standardized	441	Colon and rectum cancer	3	Rate	2005	17.412493503459352	18.447988345284042	15.604744118749664
1	Deaths	67	Japan	1	Male	22	All ages	441	Colon and rectum cancer	1	Number	2006	26034.83753252603	27037.509393628327	24347.570288605282
1	Deaths	67	Japan	2	Female	22	All ages	441	Colon and rectum cancer	1	Number	2006	22572.50673013154	24919.443576083304	18297.089728224742
1	Deaths	67	Japan	3	Both	22	All ages	441	Colon and rectum cancer	1	Number	2006	48607.34426265754	51939.89209714508	42666.00024550798
1	Deaths	67	Japan	1	Male	22	All ages	441	Colon and rectum cancer	3	Rate	2006	41.045143493945865	42.62590275026423	38.3850874804278
1	Deaths	67	Japan	2	Female	22	All ages	441	Colon and rectum cancer	3	Rate	2006	33.97498796317894	37.50747782107826	27.539847953520542
1	Deaths	67	Japan	3	Both	22	All ages	441	Colon and rectum cancer	3	Rate	2006	37.428163764144756	39.99426047222743	32.8532666940361
1	Deaths	67	Japan	1	Male	27	Age-standardized	441	Colon and rectum cancer	3	Rate	2006	22.287915527906915	23.15863709256127	20.788813734762822
1	Deaths	67	Japan	2	Female	27	Age-standardized	441	Colon and rectum cancer	3	Rate	2006	13.109890321775811	14.214271167235196	11.129031334643095
1	Deaths	67	Japan	3	Both	27	Age-standardized	441	Colon and rectum cancer	3	Rate	2006	17.087076337032016	18.108194147165925	15.26610643689746
1	Deaths	68	Republic of Korea	1	Male	22	All ages	441	Colon and rectum cancer	1	Number	2006	3944.232301052484	4448.708676480503	3448.154296283047
1	Deaths	68	Republic of Korea	2	Female	22	All ages	441	Colon and rectum cancer	1	Number	2006	3319.3015585100766	3809.842145193112	2819.3285365645247
1	Deaths	68	Republic of Korea	3	Both	22	All ages	441	Colon and rectum cancer	1	Number	2006	7263.533859562554	8019.932931681279	6558.9263021871675
1	Deaths	68	Republic of Korea	1	Male	22	All ages	441	Colon and rectum cancer	3	Rate	2006	16.46379416805381	18.569551277105536	14.393093068718594
1	Deaths	68	Republic of Korea	2	Female	22	All ages	441	Colon and rectum cancer	3	Rate	2006	13.796590540128213	15.835509721914729	11.718465686660668
1	Deaths	68	Republic of Korea	3	Both	22	All ages	441	Colon and rectum cancer	3	Rate	2006	15.127363635700721	16.702674502130098	13.659916116770553
1	Deaths	68	Republic of Korea	1	Male	27	Age-standardized	441	Colon and rectum cancer	3	Rate	2006	20.093097682049944	22.565019546024125	17.35917251789771
1	Deaths	68	Republic of Korea	2	Female	27	Age-standardized	441	Colon and rectum cancer	3	Rate	2006	11.62485548836726	13.39015568361261	9.801247498662063
1	Deaths	68	Republic of Korea	3	Both	27	Age-standardized	441	Colon and rectum cancer	3	Rate	2006	14.889303090337187	16.490717352361205	13.280921511931759
1	Deaths	71	Australia	1	Male	22	All ages	441	Colon and rectum cancer	1	Number	2005	2768.961956839871	2995.527540794928	2530.8333423291724
1	Deaths	71	Australia	2	Female	22	All ages	441	Colon and rectum cancer	1	Number	2005	2503.805973476888	2813.253452401104	2099.94540024882
1	Deaths	71	Australia	3	Both	22	All ages	441	Colon and rectum cancer	1	Number	2005	5272.767930316767	5787.04533808373	4649.145029058832
1	Deaths	71	Australia	1	Male	22	All ages	441	Colon and rectum cancer	3	Rate	2005	27.89823936862993	30.180965167104016	25.499012079959815
1	Deaths	71	Australia	2	Female	22	All ages	441	Colon and rectum cancer	3	Rate	2005	24.65403396141928	27.70104668344703	20.67737107559005
1	Deaths	71	Australia	3	Both	22	All ages	441	Colon and rectum cancer	3	Rate	2005	26.257513713733392	28.818530292798574	23.151974630962766
1	Deaths	71	Australia	1	Male	27	Age-standardized	441	Colon and rectum cancer	3	Rate	2005	21.31315912836211	23.04096963055004	19.48475519484243
1	Deaths	71	Australia	2	Female	27	Age-standardized	441	Colon and rectum cancer	3	Rate	2005	14.735586111531203	16.470010215932714	12.612308258221566
1	Deaths	71	Australia	3	Both	27	Age-standardized	441	Colon and rectum cancer	3	Rate	2005	17.791744916540207	19.450627477079713	15.82059654732323
1	Deaths	67	Japan	1	Male	22	All ages	441	Colon and rectum cancer	1	Number	2007	26562.8243790743	27580.17824508814	24830.369375123722
1	Deaths	67	Japan	2	Female	22	All ages	441	Colon and rectum cancer	1	Number	2007	22996.146079394686	25380.940502636284	18536.691438651145
1	Deaths	67	Japan	3	Both	22	All ages	441	Colon and rectum cancer	1	Number	2007	49558.97045846904	52864.41347469104	43332.80388857175
1	Deaths	67	Japan	1	Male	22	All ages	441	Colon and rectum cancer	3	Rate	2007	41.87352487511903	43.47727723998005	39.14249007747536
1	Deaths	67	Japan	2	Female	22	All ages	441	Colon and rectum cancer	3	Rate	2007	34.5790072879054	38.164991802733226	27.87338305026301
1	Deaths	67	Japan	3	Both	22	All ages	441	Colon and rectum cancer	3	Rate	2007	38.14016852653902	40.68400978327434	33.34856288878299
1	Deaths	67	Japan	1	Male	27	Age-standardized	441	Colon and rectum cancer	3	Rate	2007	22.02835323900594	22.86199708956536	20.57290940713265
1	Deaths	67	Japan	2	Female	27	Age-standardized	441	Colon and rectum cancer	3	Rate	2007	12.883138885150212	13.931644838063844	10.889401666423346
1	Deaths	67	Japan	3	Both	27	Age-standardized	441	Colon and rectum cancer	3	Rate	2007	16.86043192629748	17.83801086529381	15.040684374064567
1	Deaths	68	Republic of Korea	1	Male	22	All ages	441	Colon and rectum cancer	1	Number	2007	4114.976658429969	4657.202122928128	3573.454567731339
1	Deaths	68	Republic of Korea	2	Female	22	All ages	441	Colon and rectum cancer	1	Number	2007	3421.5530438373407	3925.4233826659006	2866.847605890503
1	Deaths	68	Republic of Korea	3	Both	22	All ages	441	Colon and rectum cancer	1	Number	2007	7536.529702267295	8329.303121650955	6741.37128661839
1	Deaths	68	Republic of Korea	1	Male	22	All ages	441	Colon and rectum cancer	3	Rate	2007	17.10204878467118	19.355564932117996	14.851455893911389
1	Deaths	68	Republic of Korea	2	Female	22	All ages	441	Colon and rectum cancer	3	Rate	2007	14.13364371290896	16.215015462890257	11.842283934145739
1	Deaths	68	Republic of Korea	3	Both	22	All ages	441	Colon and rectum cancer	3	Rate	2007	15.613318237899199	17.255695323424476	13.966000190531155
1	Deaths	68	Republic of Korea	1	Male	27	Age-standardized	441	Colon and rectum cancer	3	Rate	2007	19.904361811374017	22.415992318942507	17.270456912288758
1	Deaths	68	Republic of Korea	2	Female	27	Age-standardized	441	Colon and rectum cancer	3	Rate	2007	11.40476608222393	13.153464447992512	9.491926202210783
1	Deaths	68	Republic of Korea	3	Both	27	Age-standardized	441	Colon and rectum cancer	3	Rate	2007	14.701952644990854	16.233773062549943	13.002588022960232
1	Deaths	68	Republic of Korea	1	Male	22	All ages	441	Colon and rectum cancer	1	Number	2008	4305.97746706952	4910.298759863204	3758.3295210850715
1	Deaths	68	Republic of Korea	2	Female	22	All ages	441	Colon and rectum cancer	1	Number	2008	3501.688518626405	4029.8437668869633	2906.65241632103
1	Deaths	68	Republic of Korea	3	Both	22	All ages	441	Colon and rectum cancer	1	Number	2008	7807.665985695934	8639.756301631547	6969.80499592994
1	Deaths	68	Republic of Korea	1	Male	22	All ages	441	Colon and rectum cancer	3	Rate	2008	17.79794984304482	20.295798505858617	15.53434982450798
1	Deaths	68	Republic of Korea	2	Female	22	All ages	441	Colon and rectum cancer	3	Rate	2008	14.368866454620186	16.536104399741486	11.927188891289248
1	Deaths	68	Republic of Korea	3	Both	22	All ages	441	Colon and rectum cancer	3	Rate	2008	16.077183893348128	17.790585702503353	14.351899380126245
1	Deaths	68	Republic of Korea	1	Male	27	Age-standardized	441	Colon and rectum cancer	3	Rate	2008	19.775889868044196	22.367111878990457	17.17202172140673
1	Deaths	68	Republic of Korea	2	Female	27	Age-standardized	441	Colon and rectum cancer	3	Rate	2008	11.13271897877195	12.858022105932175	9.209818671908646
1	Deaths	68	Republic of Korea	3	Both	27	Age-standardized	441	Colon and rectum cancer	3	Rate	2008	14.512564738460707	16.075105611193365	12.827577029708824
1	Deaths	67	Japan	1	Male	22	All ages	441	Colon and rectum cancer	1	Number	2008	27040.88950276058	28045.129055396243	25232.85793093861
1	Deaths	67	Japan	2	Female	22	All ages	441	Colon and rectum cancer	1	Number	2008	23642.800398859676	26168.49731078874	18853.09560070893
1	Deaths	67	Japan	3	Both	22	All ages	441	Colon and rectum cancer	1	Number	2008	50683.68990162027	54182.37110425308	43959.09702170137
1	Deaths	67	Japan	1	Male	22	All ages	441	Colon and rectum cancer	3	Rate	2008	42.62870944683791	44.211846573298104	39.77843144329665
1	Deaths	67	Japan	2	Female	22	All ages	441	Colon and rectum cancer	3	Rate	2008	35.52398629710506	39.31891841074488	28.327317343079972
1	Deaths	67	Japan	3	Both	22	All ages	441	Colon and rectum cancer	3	Rate	2008	38.991057291543314	41.68259927440792	33.81781543105202
1	Deaths	67	Japan	1	Male	27	Age-standardized	441	Colon and rectum cancer	3	Rate	2008	21.729121017250655	22.5310254052337	20.269813108666398
1	Deaths	67	Japan	2	Female	27	Age-standardized	441	Colon and rectum cancer	3	Rate	2008	12.71292491963193	13.793391213287535	10.691732389394755
1	Deaths	67	Japan	3	Both	27	Age-standardized	441	Colon and rectum cancer	3	Rate	2008	16.65795110650537	17.624676372561918	14.804061016942896
1	Deaths	6	China	1	Male	22	All ages	441	Colon and rectum cancer	1	Number	2013	133829.6823926402	155582.03785890635	115314.05794501273
1	Deaths	6	China	2	Female	22	All ages	441	Colon and rectum cancer	1	Number	2013	74107.61289549126	85502.87579598962	63178.88888059191
1	Deaths	6	China	3	Both	22	All ages	441	Colon and rectum cancer	1	Number	2013	207937.29528813166	230440.5184987508	186805.8533341267
1	Deaths	6	China	1	Male	22	All ages	441	Colon and rectum cancer	3	Rate	2013	19.284269643540245	22.4186885608841	16.616249454872356
1	Deaths	6	China	2	Female	22	All ages	441	Colon and rectum cancer	3	Rate	2013	11.137820996343665	12.850443943341164	9.495315361085277
1	Deaths	6	China	3	Both	22	All ages	441	Colon and rectum cancer	3	Rate	2013	15.296787453253716	16.952224117412438	13.742265087733522
1	Deaths	6	China	1	Male	27	Age-standardized	441	Colon and rectum cancer	3	Rate	2013	18.828526803839466	21.73347277439988	16.3777823275676
1	Deaths	6	China	2	Female	27	Age-standardized	441	Colon and rectum cancer	3	Rate	2013	9.230551934510446	10.62606821197415	7.856866625625555
1	Deaths	6	China	3	Both	27	Age-standardized	441	Colon and rectum cancer	3	Rate	2013	13.521546435439557	14.966479852686161	12.210430099859783
1	Deaths	67	Japan	1	Male	22	All ages	441	Colon and rectum cancer	1	Number	2009	27322.192389655254	28353.874729079773	25417.338723012428
1	Deaths	67	Japan	2	Female	22	All ages	441	Colon and rectum cancer	1	Number	2009	24181.961757630157	26865.88239913466	19217.683656487057
1	Deaths	67	Japan	3	Both	22	All ages	441	Colon and rectum cancer	1	Number	2009	51504.15414728541	55048.571273559945	44576.483774454566
1	Deaths	67	Japan	1	Male	22	All ages	441	Colon and rectum cancer	3	Rate	2009	43.08238392129013	44.70916899029253	40.078758304070085
1	Deaths	67	Japan	2	Female	22	All ages	441	Colon and rectum cancer	3	Rate	2009	36.31570329189434	40.34633019688953	28.860507870345188
1	Deaths	67	Japan	3	Both	22	All ages	441	Colon and rectum cancer	3	Rate	2009	39.616554436296006	42.342889745608055	34.287849694206116
1	Deaths	67	Japan	1	Male	27	Age-standardized	441	Colon and rectum cancer	3	Rate	2009	21.342239631063816	22.136302542102943	19.8753763249374
1	Deaths	67	Japan	2	Female	27	Age-standardized	441	Colon and rectum cancer	3	Rate	2009	12.586542661469053	13.677050319842927	10.595717438422401
1	Deaths	67	Japan	3	Both	27	Age-standardized	441	Colon and rectum cancer	3	Rate	2009	16.433400792755762	17.405476529530205	14.590443258947543
1	Deaths	71	Australia	1	Male	22	All ages	441	Colon and rectum cancer	1	Number	2000	2792.02042232769	2995.3099406957185	2580.9922956280157
1	Deaths	71	Australia	2	Female	22	All ages	441	Colon and rectum cancer	1	Number	2000	2517.572732882179	2780.7823581151083	2181.889078598479
1	Deaths	71	Australia	3	Both	22	All ages	441	Colon and rectum cancer	1	Number	2000	5309.593155209871	5758.43548994463	4812.987375871461
1	Deaths	71	Australia	1	Male	22	All ages	441	Colon and rectum cancer	3	Rate	2000	29.892500613797523	32.069000471749376	27.63314808311672
1	Deaths	71	Australia	2	Female	22	All ages	441	Colon and rectum cancer	3	Rate	2000	26.375504812802934	29.133036560121887	22.85869446468522
1	Deaths	71	Australia	3	Both	22	All ages	441	Colon and rectum cancer	3	Rate	2000	28.114922319216166	30.491595447601018	25.485336115295187
1	Deaths	71	Australia	1	Male	27	Age-standardized	441	Colon and rectum cancer	3	Rate	2000	25.114131026614825	27.07232362145212	23.141338586221256
1	Deaths	71	Australia	2	Female	27	Age-standardized	441	Colon and rectum cancer	3	Rate	2000	17.184269151314954	18.92130725496343	15.044269875808094
1	Deaths	71	Australia	3	Both	27	Age-standardized	441	Colon and rectum cancer	3	Rate	2000	20.783971585115943	22.54456546127287	18.88649833107934
1	Deaths	67	Japan	1	Male	22	All ages	441	Colon and rectum cancer	1	Number	2010	28435.02398837083	29518.655067541313	26479.331047055028
1	Deaths	67	Japan	2	Female	22	All ages	441	Colon and rectum cancer	1	Number	2010	25178.389034466156	27966.718082941738	19863.537088218513
1	Deaths	67	Japan	3	Both	22	All ages	441	Colon and rectum cancer	1	Number	2010	53613.413022837	57327.6159210551	46264.6164757808
1	Deaths	67	Japan	1	Male	22	All ages	441	Colon and rectum cancer	3	Rate	2010	44.8594740884464	46.569024969689345	41.774146751926715
1	Deaths	67	Japan	2	Female	22	All ages	441	Colon and rectum cancer	3	Rate	2010	37.80608398603811	41.992841210381414	29.82567909285202
1	Deaths	67	Japan	3	Both	22	All ages	441	Colon and rectum cancer	3	Rate	2010	41.245635942558884	44.10303023848715	35.5920919895428
1	Deaths	67	Japan	1	Male	27	Age-standardized	441	Colon and rectum cancer	3	Rate	2010	21.61025793318214	22.41288760313046	20.164313328772817
1	Deaths	67	Japan	2	Female	27	Age-standardized	441	Colon and rectum cancer	3	Rate	2010	12.682475079923709	13.747986261457209	10.62129342813268
1	Deaths	67	Japan	3	Both	27	Age-standardized	441	Colon and rectum cancer	3	Rate	2010	16.630591109584064	17.59162565565654	14.757668213591854
1	Deaths	71	Australia	1	Male	22	All ages	441	Colon and rectum cancer	1	Number	1998	2690.9961647584178	2887.4793681695046	2497.7304142810212
1	Deaths	71	Australia	2	Female	22	All ages	441	Colon and rectum cancer	1	Number	1998	2464.0706575554054	2736.102305139348	2135.904956773509
1	Deaths	71	Australia	3	Both	22	All ages	441	Colon and rectum cancer	1	Number	1998	5155.066822313827	5582.60789559196	4661.177454730277
1	Deaths	71	Australia	1	Male	22	All ages	441	Colon and rectum cancer	3	Rate	1998	29.44423561844068	31.594107778076904	27.329568058317214
1	Deaths	71	Australia	2	Female	22	All ages	441	Colon and rectum cancer	3	Rate	1998	26.420408336597333	29.337202620725293	22.90173009166213
1	Deaths	71	Australia	3	Both	22	All ages	441	Colon and rectum cancer	3	Rate	1998	27.917003281296324	30.232330309440908	25.242370425763582
1	Deaths	71	Australia	1	Male	27	Age-standardized	441	Colon and rectum cancer	3	Rate	1998	25.723441033479524	27.6578752428956	23.799892050622375
1	Deaths	71	Australia	2	Female	27	Age-standardized	441	Colon and rectum cancer	3	Rate	1998	17.89892100305399	19.818927796234156	15.625871477296402
1	Deaths	71	Australia	3	Both	27	Age-standardized	441	Colon and rectum cancer	3	Rate	1998	21.415449443603613	23.176090204049387	19.391355694559753
1	Deaths	71	Australia	1	Male	22	All ages	441	Colon and rectum cancer	1	Number	1992	2457.5742523055023	2643.4249859645147	2268.721104934725
1	Deaths	71	Australia	2	Female	22	All ages	441	Colon and rectum cancer	1	Number	1992	2312.443142430051	2557.6929016770046	2041.121372369566
1	Deaths	71	Australia	3	Both	22	All ages	441	Colon and rectum cancer	1	Number	1992	4770.017394735558	5179.717593361998	4338.657167379999
1	Deaths	71	Australia	1	Male	22	All ages	441	Colon and rectum cancer	3	Rate	1992	28.601310515274697	30.764245994390503	26.40343287040953
1	Deaths	71	Australia	2	Female	22	All ages	441	Colon and rectum cancer	3	Rate	1992	26.54617819462184	29.361574470404967	23.43148277835447
1	Deaths	71	Australia	3	Both	22	All ages	441	Colon and rectum cancer	3	Rate	1992	27.566707401589845	29.934431576007576	25.073806393447274
1	Deaths	71	Australia	1	Male	27	Age-standardized	441	Colon and rectum cancer	3	Rate	1992	27.82132199761987	30.077824551210583	25.641871178565363
1	Deaths	71	Australia	2	Female	27	Age-standardized	441	Colon and rectum cancer	3	Rate	1992	19.86194775130441	21.96229857787163	17.588175438357748
1	Deaths	71	Australia	3	Both	27	Age-standardized	441	Colon and rectum cancer	3	Rate	1992	23.343622546024395	25.376993231905864	21.20390150580659
1	Deaths	71	Australia	1	Male	22	All ages	441	Colon and rectum cancer	1	Number	1995	2611.2282620075766	2806.420212374557	2427.4671901107986
1	Deaths	71	Australia	2	Female	22	All ages	441	Colon and rectum cancer	1	Number	1995	2393.763142578275	2624.416315013231	2089.879357541006
1	Deaths	71	Australia	3	Both	22	All ages	441	Colon and rectum cancer	1	Number	1995	5004.991404585849	5394.894719955651	4533.834379853564
1	Deaths	71	Australia	1	Male	22	All ages	441	Colon and rectum cancer	3	Rate	1995	29.451070690980966	31.652567975691284	27.3784980256861
1	Deaths	71	Australia	2	Female	22	All ages	441	Colon and rectum cancer	3	Rate	1995	26.535713428096354	29.092585649974946	23.167053892922397
1	Deaths	71	Australia	3	Both	22	All ages	441	Colon and rectum cancer	3	Rate	1995	27.980794590668022	30.160579468537488	25.34675451681194
1	Deaths	71	Australia	1	Male	27	Age-standardized	441	Colon and rectum cancer	3	Rate	1995	27.25476971404647	29.35088729687229	25.296003091692725
1	Deaths	71	Australia	2	Female	27	Age-standardized	441	Colon and rectum cancer	3	Rate	1995	18.94432621152336	20.72289870768458	16.68248607585378
1	Deaths	71	Australia	3	Both	27	Age-standardized	441	Colon and rectum cancer	3	Rate	1995	22.628784082149295	24.426392037367407	20.48696206054865
1	Deaths	68	Republic of Korea	1	Male	22	All ages	441	Colon and rectum cancer	1	Number	2009	4496.0899021684645	5109.154361076469	3898.626575489397
1	Deaths	68	Republic of Korea	2	Female	22	All ages	441	Colon and rectum cancer	1	Number	2009	3604.8030753014627	4205.167780166293	2987.417214574731
1	Deaths	68	Republic of Korea	3	Both	22	All ages	441	Colon and rectum cancer	1	Number	2009	8100.892977469909	8929.411941096196	7202.595734432299
1	Deaths	68	Republic of Korea	1	Male	22	All ages	441	Colon and rectum cancer	3	Rate	2009	18.455713243165874	20.972242516240673	16.00322406469581
1	Deaths	68	Republic of Korea	2	Female	22	All ages	441	Colon and rectum cancer	3	Rate	2009	14.684908979818617	17.130618457276938	12.169860312578773
1	Deaths	68	Republic of Korea	3	Both	22	All ages	441	Colon and rectum cancer	3	Rate	2009	16.563134690662725	18.257129565854402	14.726470724102088
1	Deaths	68	Republic of Korea	1	Male	27	Age-standardized	441	Colon and rectum cancer	3	Rate	2009	19.611578901680904	22.308412114874837	16.94262222936499
1	Deaths	68	Republic of Korea	2	Female	27	Age-standardized	441	Colon and rectum cancer	3	Rate	2009	10.931873041003445	12.768450845942615	8.987432677377152
1	Deaths	68	Republic of Korea	3	Both	27	Age-standardized	441	Colon and rectum cancer	3	Rate	2009	14.358111336914995	15.853414641089627	12.664511618918896
1	Deaths	71	Australia	1	Male	22	All ages	441	Colon and rectum cancer	1	Number	2010	2923.001559738215	3176.5285646344223	2660.377167185664
1	Deaths	71	Australia	2	Female	22	All ages	441	Colon and rectum cancer	1	Number	2010	2603.451918508768	2962.8545168496153	2181.456337772438
1	Deaths	71	Australia	3	Both	22	All ages	441	Colon and rectum cancer	1	Number	2010	5526.453478246982	6080.245010527283	4867.718102772765
1	Deaths	71	Australia	1	Male	22	All ages	441	Colon and rectum cancer	3	Rate	2010	27.377684346858576	29.752292150377688	24.91786775964707
1	Deaths	71	Australia	2	Female	22	All ages	441	Colon and rectum cancer	3	Rate	2010	23.88450474931219	27.181724492822557	20.013046482451276
1	Deaths	71	Australia	3	Both	22	All ages	441	Colon and rectum cancer	3	Rate	2010	25.61299569147849	28.179607386683074	22.56000946798866
1	Deaths	71	Australia	1	Male	27	Age-standardized	441	Colon and rectum cancer	3	Rate	2010	19.410057214860192	21.091871298105254	17.69329641629799
1	Deaths	71	Australia	2	Female	27	Age-standardized	441	Colon and rectum cancer	3	Rate	2010	13.42811529860548	15.162266243210677	11.44870885163484
1	Deaths	71	Australia	3	Both	27	Age-standardized	441	Colon and rectum cancer	3	Rate	2010	16.197716021566134	17.787813646817163	14.343098006611203
1	Deaths	68	Republic of Korea	1	Male	22	All ages	441	Colon and rectum cancer	1	Number	2010	4716.380768851925	5407.244072111827	4036.719521701436
1	Deaths	68	Republic of Korea	2	Female	22	All ages	441	Colon and rectum cancer	1	Number	2010	3717.73141413674	4353.477569528847	3080.910596842993
1	Deaths	68	Republic of Korea	3	Both	22	All ages	441	Colon and rectum cancer	1	Number	2010	8434.112182988665	9356.837992723587	7401.0192055486405
1	Deaths	68	Republic of Korea	1	Male	22	All ages	441	Colon and rectum cancer	3	Rate	2010	19.193227165076735	22.004683018483213	16.427357878608117
1	Deaths	68	Republic of Korea	2	Female	22	All ages	441	Colon and rectum cancer	3	Rate	2010	15.024162274115715	17.593350937782013	12.4506306676702
1	Deaths	68	Republic of Korea	3	Both	22	All ages	441	Colon and rectum cancer	3	Rate	2010	17.101430497661617	18.972395806305247	15.006679163081632
1	Deaths	68	Republic of Korea	1	Male	27	Age-standardized	441	Colon and rectum cancer	3	Rate	2010	19.639444296171852	22.430463955513666	16.837256382964636
1	Deaths	68	Republic of Korea	2	Female	27	Age-standardized	441	Colon and rectum cancer	3	Rate	2010	10.761421121005393	12.61649524950821	8.866777078864972
1	Deaths	68	Republic of Korea	3	Both	27	Age-standardized	441	Colon and rectum cancer	3	Rate	2010	14.28791135227292	15.884547623874434	12.524370051793515
1	Deaths	67	Japan	1	Male	22	All ages	441	Colon and rectum cancer	1	Number	2011	29576.199052281034	30672.906549674502	27584.86538337728
1	Deaths	67	Japan	2	Female	22	All ages	441	Colon and rectum cancer	1	Number	2011	26403.714756252408	29390.980336557095	20746.74789320958
1	Deaths	67	Japan	3	Both	22	All ages	441	Colon and rectum cancer	1	Number	2011	55979.91380853346	59908.78097139439	48302.6871879136
1	Deaths	67	Japan	1	Male	22	All ages	441	Colon and rectum cancer	3	Rate	2011	46.70258307077005	48.43434964803768	43.55814838769246
1	Deaths	67	Japan	2	Female	22	All ages	441	Colon and rectum cancer	3	Rate	2011	39.66369019572642	44.15116393203103	31.16578817040291
1	Deaths	67	Japan	3	Both	22	All ages	441	Colon and rectum cancer	3	Rate	2011	43.09534805578483	46.119931095114644	37.185143291083754
1	Deaths	67	Japan	1	Male	27	Age-standardized	441	Colon and rectum cancer	3	Rate	2011	21.930367312846148	22.722146820300583	20.519094569490264
1	Deaths	67	Japan	2	Female	27	Age-standardized	441	Colon and rectum cancer	3	Rate	2011	12.887901510448172	13.99608392661027	10.777297985697592
1	Deaths	67	Japan	3	Both	27	Age-standardized	441	Colon and rectum cancer	3	Rate	2011	16.91396443967672	17.90033116738648	15.055301284536347
1	Deaths	68	Republic of Korea	1	Male	22	All ages	441	Colon and rectum cancer	1	Number	2011	4894.953234157117	5654.252653163596	4117.86752255326
1	Deaths	68	Republic of Korea	2	Female	22	All ages	441	Colon and rectum cancer	1	Number	2011	3841.9455617827757	4509.01938468085	3152.6685134484046
1	Deaths	68	Republic of Korea	3	Both	22	All ages	441	Colon and rectum cancer	1	Number	2011	8736.8987959399	9766.068941579399	7616.017715829579
1	Deaths	68	Republic of Korea	1	Male	22	All ages	441	Colon and rectum cancer	3	Rate	2011	19.70634499540863	22.76317017636086	16.577914877423016
1	Deaths	68	Republic of Korea	2	Female	22	All ages	441	Colon and rectum cancer	3	Rate	2011	15.39094624319498	18.06326348022075	12.62968223594035
1	Deaths	68	Republic of Korea	3	Both	22	All ages	441	Colon and rectum cancer	3	Rate	2011	17.543321067277173	19.609850933252115	15.292639546764466
1	Deaths	68	Republic of Korea	1	Male	27	Age-standardized	441	Colon and rectum cancer	3	Rate	2011	19.559673383318987	22.553687199899784	16.57103449998042
1	Deaths	68	Republic of Korea	2	Female	27	Age-standardized	441	Colon and rectum cancer	3	Rate	2011	10.637754318916425	12.563853626492934	8.701426613495867
1	Deaths	68	Republic of Korea	3	Both	27	Age-standardized	441	Colon and rectum cancer	3	Rate	2011	14.1990819232371	15.932394689417773	12.315201548821067
1	Deaths	67	Japan	1	Male	22	All ages	441	Colon and rectum cancer	1	Number	2012	30273.59208712407	31432.463179096136	28147.199126718384
1	Deaths	67	Japan	2	Female	22	All ages	441	Colon and rectum cancer	1	Number	2012	27321.37847494589	30561.207476867363	21284.09521323735
1	Deaths	67	Japan	3	Both	22	All ages	441	Colon and rectum cancer	1	Number	2012	57594.97056206996	61816.466520408176	49469.71688887305
1	Deaths	67	Japan	1	Male	22	All ages	441	Colon and rectum cancer	3	Rate	2012	47.85848341812869	49.69050298089749	44.496941717258515
1	Deaths	67	Japan	2	Female	22	All ages	441	Colon and rectum cancer	3	Rate	2012	41.076273025215386	45.94718760077281	31.999531314839594
1	Deaths	67	Japan	3	Both	22	All ages	441	Colon and rectum cancer	3	Rate	2012	44.382259960208884	47.63531364207542	38.12099934583229
1	Deaths	67	Japan	1	Male	27	Age-standardized	441	Colon and rectum cancer	3	Rate	2012	21.799586277991178	22.5981888179716	20.366082820094206
1	Deaths	67	Japan	2	Female	27	Age-standardized	441	Colon and rectum cancer	3	Rate	2012	12.941910728176467	14.095039012410414	10.755182124488885
1	Deaths	67	Japan	3	Both	27	Age-standardized	441	Colon and rectum cancer	3	Rate	2012	16.90504966882898	17.903019656606904	15.022350169162959
1	Deaths	71	Australia	1	Male	22	All ages	441	Colon and rectum cancer	1	Number	2001	2802.3992400349043	3004.6315077903764	2586.701185453239
1	Deaths	71	Australia	2	Female	22	All ages	441	Colon and rectum cancer	1	Number	2001	2547.2579849519802	2812.670464149298	2196.9307339809784
1	Deaths	71	Australia	3	Both	22	All ages	441	Colon and rectum cancer	1	Number	2001	5349.657224986881	5801.731507691647	4794.146363487131
1	Deaths	71	Australia	1	Male	22	All ages	441	Colon and rectum cancer	3	Rate	2001	29.664847309492153	31.80558059913708	27.38157169240343
1	Deaths	71	Australia	2	Female	22	All ages	441	Colon and rectum cancer	3	Rate	2001	26.371669506902403	29.11947527520241	22.74474418703024
1	Deaths	71	Australia	3	Both	22	All ages	441	Colon and rectum cancer	3	Rate	2001	27.999970495470453	30.366115847432777	25.092440708467226
1	Deaths	71	Australia	1	Male	27	Age-standardized	441	Colon and rectum cancer	3	Rate	2001	24.377742992850226	26.193406010775615	22.45290240334886
1	Deaths	71	Australia	2	Female	27	Age-standardized	441	Colon and rectum cancer	3	Rate	2001	16.829710859446582	18.519599956122924	14.673887231728779
1	Deaths	71	Australia	3	Both	27	Age-standardized	441	Colon and rectum cancer	3	Rate	2001	20.27575174436206	21.932799749162808	18.276273645975948
1	Deaths	71	Australia	1	Male	22	All ages	441	Colon and rectum cancer	1	Number	2004	2730.424523947696	2937.9839100050726	2505.0123802723233
1	Deaths	71	Australia	2	Female	22	All ages	441	Colon and rectum cancer	1	Number	2004	2521.537735432918	2817.7806565542237	2125.632283644634
1	Deaths	71	Australia	3	Both	22	All ages	441	Colon and rectum cancer	1	Number	2004	5251.9622593806125	5751.401923233383	4641.993162002422
1	Deaths	71	Australia	1	Male	22	All ages	441	Colon and rectum cancer	3	Rate	2004	27.874539381430296	29.993485439048055	25.573336905103513
1	Deaths	71	Australia	2	Female	22	All ages	441	Colon and rectum cancer	3	Rate	2004	25.15549984067565	28.11089434076584	21.205846662999566
1	Deaths	71	Australia	3	Both	22	All ages	441	Colon and rectum cancer	3	Rate	2004	26.49935253364086	29.019330223518317	23.421686444707895
1	Deaths	71	Australia	1	Male	27	Age-standardized	441	Colon and rectum cancer	3	Rate	2004	21.662142530809906	23.355755478805968	19.867790178264396
1	Deaths	71	Australia	2	Female	27	Age-standardized	441	Colon and rectum cancer	3	Rate	2004	15.287223143648903	16.99304727184779	13.196499465328154
1	Deaths	71	Australia	3	Both	27	Age-standardized	441	Colon and rectum cancer	3	Rate	2004	18.245618321919153	19.946261291800404	16.24460883571334
1	Deaths	71	Australia	1	Male	22	All ages	441	Colon and rectum cancer	1	Number	2006	2770.1630937886257	2998.9024784441776	2528.7159283663204
1	Deaths	71	Australia	2	Female	22	All ages	441	Colon and rectum cancer	1	Number	2006	2508.8321369818636	2839.6850814019203	2094.7882291323754
1	Deaths	71	Australia	3	Both	22	All ages	441	Colon and rectum cancer	1	Number	2006	5278.995230770489	5787.919813817267	4650.153853516846
1	Deaths	71	Australia	1	Male	22	All ages	441	Colon and rectum cancer	3	Rate	2006	27.525130576388634	29.797950340944823	25.126042677755713
1	Deaths	71	Australia	2	Female	22	All ages	441	Colon and rectum cancer	3	Rate	2006	24.370495456454634	27.584361406228222	20.348522433118973
1	Deaths	71	Australia	3	Both	22	All ages	441	Colon and rectum cancer	3	Rate	2006	25.92996060067378	28.42975342302708	22.841147024708405
1	Deaths	71	Australia	1	Male	27	Age-standardized	441	Colon and rectum cancer	3	Rate	2006	20.677777515607286	22.4075658355075	18.88185562201585
1	Deaths	71	Australia	2	Female	27	Age-standardized	441	Colon and rectum cancer	3	Rate	2006	14.35873275322902	16.14121195375852	12.222341040760089
1	Deaths	71	Australia	3	Both	27	Age-standardized	441	Colon and rectum cancer	3	Rate	2006	17.27849123899585	18.8897737146102	15.370436084070901
1	Deaths	6	China	1	Male	22	All ages	441	Colon and rectum cancer	1	Number	2014	136669.3474951713	160071.54214060705	118511.70625453562
1	Deaths	6	China	2	Female	22	All ages	441	Colon and rectum cancer	1	Number	2014	75478.44915485014	86948.15374492072	64437.505783664565
1	Deaths	6	China	3	Both	22	All ages	441	Colon and rectum cancer	1	Number	2014	212147.79665002163	238100.721981962	188735.16292941902
1	Deaths	6	China	1	Male	22	All ages	441	Colon and rectum cancer	3	Rate	2014	19.570112306463407	22.921145920237475	16.970062735638674
1	Deaths	6	China	2	Female	22	All ages	441	Colon and rectum cancer	3	Rate	2014	11.272801148813526	12.985815930214748	9.623822393787151
1	Deaths	6	China	3	Both	22	All ages	441	Colon and rectum cancer	3	Rate	2014	15.508786796659304	17.40604140914384	13.797236875072775
1	Deaths	6	China	1	Male	27	Age-standardized	441	Colon and rectum cancer	3	Rate	2014	18.595909658746827	21.578188225168432	16.276144954698516
1	Deaths	6	China	2	Female	27	Age-standardized	441	Colon and rectum cancer	3	Rate	2014	9.056006858961105	10.418568253580926	7.699637758161819
1	Deaths	6	China	3	Both	27	Age-standardized	441	Colon and rectum cancer	3	Rate	2014	13.325990241571533	14.93915970633109	11.916615335390377
1	Deaths	71	Australia	1	Male	22	All ages	441	Colon and rectum cancer	1	Number	1991	2428.431285563915	2627.9928462160847	2229.332583520295
1	Deaths	71	Australia	2	Female	22	All ages	441	Colon and rectum cancer	1	Number	1991	2265.253803138268	2506.100558738963	2003.58113885358
1	Deaths	71	Australia	3	Both	22	All ages	441	Colon and rectum cancer	1	Number	1991	4693.685088702183	5128.465867937999	4266.004365424582
1	Deaths	71	Australia	1	Male	22	All ages	441	Colon and rectum cancer	3	Rate	1991	28.601036043660386	30.951387656683888	26.25613578346085
1	Deaths	71	Australia	2	Female	22	All ages	441	Colon and rectum cancer	3	Rate	1991	26.348169818212526	29.14956505610642	23.304539216729637
1	Deaths	71	Australia	3	Both	22	All ages	441	Colon and rectum cancer	3	Rate	1991	27.46757101230318	30.011919792154202	24.964771950325872
1	Deaths	71	Australia	1	Male	27	Age-standardized	441	Colon and rectum cancer	3	Rate	1991	28.163927496143874	30.482475254611778	25.831366137188812
1	Deaths	71	Australia	2	Female	27	Age-standardized	441	Colon and rectum cancer	3	Rate	1991	19.956832693352734	22.086149728663635	17.735269185411525
1	Deaths	71	Australia	3	Both	27	Age-standardized	441	Colon and rectum cancer	3	Rate	1991	23.562878178342384	25.720827654919578	21.375642901676063
1	Deaths	68	Republic of Korea	1	Male	22	All ages	441	Colon and rectum cancer	1	Number	2012	5056.037472175561	5893.728925333297	4227.501816327974
1	Deaths	68	Republic of Korea	2	Female	22	All ages	441	Colon and rectum cancer	1	Number	2012	3968.927579247503	4710.016113213592	3264.8916298410427
1	Deaths	68	Republic of Korea	3	Both	22	All ages	441	Colon and rectum cancer	1	Number	2012	9024.96505142307	10069.646078228872	7836.308959474291
1	Deaths	68	Republic of Korea	1	Male	22	All ages	441	Colon and rectum cancer	3	Rate	2012	20.113722836851984	23.44619293904931	16.817675955499055
1	Deaths	68	Republic of Korea	2	Female	22	All ages	441	Colon and rectum cancer	3	Rate	2012	15.758946865885484	18.70149862489309	12.963515380468152
1	Deaths	68	Republic of Korea	3	Both	22	All ages	441	Colon and rectum cancer	3	Rate	2012	17.93425881038546	20.010231382277087	15.572181409743438
1	Deaths	68	Republic of Korea	1	Male	27	Age-standardized	441	Colon and rectum cancer	3	Rate	2012	19.263021163648084	22.376377241530346	15.99037162577202
1	Deaths	68	Republic of Korea	2	Female	27	Age-standardized	441	Colon and rectum cancer	3	Rate	2012	10.464233055481605	12.388989021265724	8.578576070583795
1	Deaths	68	Republic of Korea	3	Both	27	Age-standardized	441	Colon and rectum cancer	3	Rate	2012	13.998216677125937	15.712643287660695	12.132171601811795
1	Deaths	71	Australia	1	Male	22	All ages	441	Colon and rectum cancer	1	Number	2007	2817.7049108394936	3057.5319546960004	2571.1186502517717
1	Deaths	71	Australia	2	Female	22	All ages	441	Colon and rectum cancer	1	Number	2007	2560.5998347549876	2896.791336526576	2139.862130781777
1	Deaths	71	Australia	3	Both	22	All ages	441	Colon and rectum cancer	1	Number	2007	5378.304745594488	5898.464297988925	4739.249596538861
1	Deaths	71	Australia	1	Male	22	All ages	441	Colon and rectum cancer	3	Rate	2007	27.594497956170976	29.9431849482241	25.179616242464327
1	Deaths	71	Australia	2	Female	22	All ages	441	Colon and rectum cancer	3	Rate	2007	24.52873341068847	27.749209960739957	20.498364105610534
1	Deaths	71	Australia	3	Both	22	All ages	441	Colon and rectum cancer	3	Rate	2007	26.044685664087073	28.563581985159672	22.950032001554522
1	Deaths	71	Australia	1	Male	27	Age-standardized	441	Colon and rectum cancer	3	Rate	2007	20.374936820221123	22.09924686256281	18.628227199784433
1	Deaths	71	Australia	2	Female	27	Age-standardized	441	Colon and rectum cancer	3	Rate	2007	14.32361456106527	16.04137692356163	12.183608800599256
1	Deaths	71	Australia	3	Both	27	Age-standardized	441	Colon and rectum cancer	3	Rate	2007	17.11680519898191	18.68411202813154	15.254952593319807
1	Deaths	6	China	1	Male	22	All ages	441	Colon and rectum cancer	1	Number	2015	140867.16134043044	166950.65900057738	116765.19749040184
1	Deaths	6	China	2	Female	22	All ages	441	Colon and rectum cancer	1	Number	2015	77834.75925707055	90433.50285202915	65278.41242808271
1	Deaths	6	China	3	Both	22	All ages	441	Colon and rectum cancer	1	Number	2015	218701.92059750116	248042.3539346122	191024.11945511145
1	Deaths	6	China	1	Male	22	All ages	441	Colon and rectum cancer	3	Rate	2015	20.028884755874948	23.737508992312073	16.602000507275164
1	Deaths	6	China	2	Female	22	All ages	441	Colon and rectum cancer	3	Rate	2015	11.547483758442164	13.416620226881161	9.684637230013626
1	Deaths	6	China	3	Both	22	All ages	441	Colon and rectum cancer	3	Rate	2015	15.878330739027005	18.008522843788743	13.868850074809632
1	Deaths	6	China	1	Male	27	Age-standardized	441	Colon and rectum cancer	3	Rate	2015	18.60819905151798	21.788086368716627	15.585958293163943
1	Deaths	6	China	2	Female	27	Age-standardized	441	Colon and rectum cancer	3	Rate	2015	9.010619950598112	10.45321298146282	7.548158896008965
1	Deaths	6	China	3	Both	27	Age-standardized	441	Colon and rectum cancer	3	Rate	2015	13.299576404511024	15.046297106690734	11.595457441181146
1	Deaths	71	Australia	1	Male	22	All ages	441	Colon and rectum cancer	1	Number	2008	2847.3146141170496	3091.4018197302416	2598.355761968323
1	Deaths	71	Australia	2	Female	22	All ages	441	Colon and rectum cancer	1	Number	2008	2598.3527419629495	2922.4447285207225	2164.136420459197
1	Deaths	71	Australia	3	Both	22	All ages	441	Colon and rectum cancer	1	Number	2008	5445.67	5987.443547560556	4804.5786048506425
1	Deaths	71	Australia	1	Male	22	All ages	441	Colon and rectum cancer	3	Rate	2008	27.474788607240658	29.830076056932654	25.072492843795953
1	Deaths	71	Australia	2	Female	22	All ages	441	Colon and rectum cancer	3	Rate	2008	24.539739313321224	27.600575794535803	20.438850637505194
1	Deaths	71	Australia	3	Both	22	All ages	441	Colon and rectum cancer	3	Rate	2008	25.99150601921299	28.577337694409085	22.931667610643313
1	Deaths	71	Australia	1	Male	27	Age-standardized	441	Colon and rectum cancer	3	Rate	2008	20.01508490623861	21.703934057306082	18.279454211744273
1	Deaths	71	Australia	2	Female	27	Age-standardized	441	Colon and rectum cancer	3	Rate	2008	14.139051572814077	15.746620085904057	11.966433420385679
1	Deaths	71	Australia	3	Both	27	Age-standardized	441	Colon and rectum cancer	3	Rate	2008	16.863643788933032	18.4995284331825	15.004134997458818
1	Deaths	71	Australia	1	Male	22	All ages	441	Colon and rectum cancer	1	Number	2009	2868.566721160647	3111.8124737274106	2611.6196900019986
1	Deaths	71	Australia	2	Female	22	All ages	441	Colon and rectum cancer	1	Number	2009	2586.485533672717	2932.8213934834644	2153.339487578696
1	Deaths	71	Australia	3	Both	22	All ages	441	Colon and rectum cancer	1	Number	2009	5455.052254833366	6002.732763808572	4803.908282866643
1	Deaths	71	Australia	1	Male	22	All ages	441	Colon and rectum cancer	3	Rate	2009	27.270966805507154	29.583462030002025	24.828215899345253
1	Deaths	71	Australia	2	Female	22	All ages	441	Colon and rectum cancer	3	Rate	2009	24.07843626242594	27.3025895844838	20.046138641805864
1	Deaths	71	Australia	3	Both	22	All ages	441	Colon and rectum cancer	3	Rate	2009	25.65794656545083	28.233972711080135	22.595277967852248
1	Deaths	71	Australia	1	Male	27	Age-standardized	441	Colon and rectum cancer	3	Rate	2009	19.607051345808287	21.285585817354935	17.842820598609837
1	Deaths	71	Australia	2	Female	27	Age-standardized	441	Colon and rectum cancer	3	Rate	2009	13.70651531944026	15.412498252819992	11.593396932003957
1	Deaths	71	Australia	3	Both	27	Age-standardized	441	Colon and rectum cancer	3	Rate	2009	16.438571116322752	18.044356910199433	14.59759422575081
1	Deaths	67	Japan	1	Male	22	All ages	441	Colon and rectum cancer	1	Number	2013	30863.78897359547	32117.24156386656	28561.125860618984
1	Deaths	67	Japan	2	Female	22	All ages	441	Colon and rectum cancer	1	Number	2013	28007.79232388031	31471.464684266433	21746.833502155663
1	Deaths	67	Japan	3	Both	22	All ages	441	Colon and rectum cancer	1	Number	2013	58871.58129747579	63295.04421825358	50380.392456076224
1	Deaths	67	Japan	1	Male	22	All ages	441	Colon and rectum cancer	3	Rate	2013	48.849624300978206	50.83352485726486	45.20508707138352
1	Deaths	67	Japan	2	Female	22	All ages	441	Colon and rectum cancer	3	Rate	2013	42.149073687445146	47.36157240418998	32.72692389144255
1	Deaths	67	Japan	3	Both	22	All ages	441	Colon and rectum cancer	3	Rate	2013	45.41488446162225	48.82724494251883	38.86458715899979
1	Deaths	67	Japan	1	Male	27	Age-standardized	441	Colon and rectum cancer	3	Rate	2013	21.636077537008546	22.46088494627111	20.1537678619092
1	Deaths	67	Japan	2	Female	27	Age-standardized	441	Colon and rectum cancer	3	Rate	2013	12.919319699094507	14.06705976301608	10.730844811302712
1	Deaths	67	Japan	3	Both	27	Age-standardized	441	Colon and rectum cancer	3	Rate	2013	16.83962282695571	17.857953309878024	14.935948911755048
1	Deaths	68	Republic of Korea	1	Male	22	All ages	441	Colon and rectum cancer	1	Number	2013	5150.002895084847	6009.556406608271	4276.954015136369
1	Deaths	68	Republic of Korea	2	Female	22	All ages	441	Colon and rectum cancer	1	Number	2013	4058.6292074671733	4818.9352702723245	3272.573537644464
1	Deaths	68	Republic of Korea	3	Both	22	All ages	441	Colon and rectum cancer	1	Number	2013	9208.632102552025	10309.649971891125	7977.899948576499
1	Deaths	68	Republic of Korea	1	Male	22	All ages	441	Colon and rectum cancer	3	Rate	2013	20.245751756472906	23.624838597825264	16.813611764556953
1	Deaths	68	Republic of Korea	2	Female	22	All ages	441	Colon and rectum cancer	3	Rate	2013	15.979993375263147	18.973537556250495	12.88506556731148
1	Deaths	68	Republic of Korea	3	Both	22	All ages	441	Colon and rectum cancer	3	Rate	2013	18.114519721900887	20.280358218454673	15.693517163943454
1	Deaths	68	Republic of Korea	1	Male	27	Age-standardized	441	Colon and rectum cancer	3	Rate	2013	18.705670389401266	21.66598333522436	15.436241388650492
1	Deaths	68	Republic of Korea	2	Female	27	Age-standardized	441	Colon and rectum cancer	3	Rate	2013	10.228543413563774	12.203411286260442	8.225480403035169
1	Deaths	68	Republic of Korea	3	Both	27	Age-standardized	441	Colon and rectum cancer	3	Rate	2013	13.65592074545979	15.371850677137973	11.788247224422205
1	Deaths	6	China	1	Male	22	All ages	441	Colon and rectum cancer	1	Number	2016	146218.3132924097	177346.2563881424	118432.13338944122
1	Deaths	6	China	2	Female	22	All ages	441	Colon and rectum cancer	1	Number	2016	81603.66095165278	96165.30550333264	68401.65598701026
1	Deaths	6	China	3	Both	22	All ages	441	Colon and rectum cancer	1	Number	2016	227821.97424406238	262305.949319491	197699.20212122935
1	Deaths	6	China	1	Male	22	All ages	441	Colon and rectum cancer	3	Rate	2016	20.625086659804502	25.015894551337436	16.705657174268268
1	Deaths	6	China	2	Female	22	All ages	441	Colon and rectum cancer	3	Rate	2016	12.019894914199034	14.164767279579914	10.075292055930788
1	Deaths	6	China	3	Both	22	All ages	441	Colon and rectum cancer	3	Rate	2016	16.41558814713645	18.900312170763428	14.245108224559964
1	Deaths	6	China	1	Male	27	Age-standardized	441	Colon and rectum cancer	3	Rate	2016	18.72035298665366	22.561762096326408	15.354345618530733
1	Deaths	6	China	2	Female	27	Age-standardized	441	Colon and rectum cancer	3	Rate	2016	9.10010957955053	10.714322896511911	7.62090074273585
1	Deaths	6	China	3	Both	27	Age-standardized	441	Colon and rectum cancer	3	Rate	2016	13.39405029847993	15.42862455100196	11.637717505244476
1	Deaths	6	China	1	Male	22	All ages	441	Colon and rectum cancer	1	Number	2017	150648.1284224347	184199.63048456525	121852.10473563748
1	Deaths	6	China	2	Female	22	All ages	441	Colon and rectum cancer	1	Number	2017	85474.03907000356	103630.43285447541	69482.9710824394
1	Deaths	6	China	3	Both	22	All ages	441	Colon and rectum cancer	1	Number	2017	236122.16749243834	275768.10982684244	202934.84209664806
1	Deaths	6	China	1	Male	22	All ages	441	Colon and rectum cancer	3	Rate	2017	21.083224599721827	25.778761550903653	17.05321744778933
1	Deaths	6	China	2	Female	22	All ages	441	Colon and rectum cancer	3	Rate	2017	12.503096078026669	15.159003513637767	10.16393132561544
1	Deaths	6	China	3	Both	22	All ages	441	Colon and rectum cancer	3	Rate	2017	16.888025578961063	19.723598771244557	14.514388210926317
1	Deaths	6	China	1	Male	27	Age-standardized	441	Colon and rectum cancer	3	Rate	2017	18.614635820711204	22.529666571331454	15.173451049273622
1	Deaths	6	China	2	Female	27	Age-standardized	441	Colon and rectum cancer	3	Rate	2017	9.17555043435321	11.110791432976248	7.465508033287148
1	Deaths	6	China	3	Both	27	Age-standardized	441	Colon and rectum cancer	3	Rate	2017	13.397855014925824	15.59386971678416	11.510904510563272
1	Deaths	68	Republic of Korea	1	Male	22	All ages	441	Colon and rectum cancer	1	Number	2014	5261.875069504317	6082.487555941009	4395.615898234213
1	Deaths	68	Republic of Korea	2	Female	22	All ages	441	Colon and rectum cancer	1	Number	2014	4144.446386955109	4961.234436288821	3286.8646697013774
1	Deaths	68	Republic of Korea	3	Both	22	All ages	441	Colon and rectum cancer	1	Number	2014	9406.32145645943	10560.820867968047	8128.896917979046
1	Deaths	68	Republic of Korea	1	Male	22	All ages	441	Colon and rectum cancer	3	Rate	2014	20.46447820620996	23.656003303747006	17.095424076793602
1	Deaths	68	Republic of Korea	2	Female	22	All ages	441	Colon and rectum cancer	3	Rate	2014	16.19724623683324	19.389401695763105	12.845661743838955
1	Deaths	68	Republic of Korea	3	Both	22	All ages	441	Colon and rectum cancer	3	Rate	2014	18.33605634146567	20.58656057456034	15.845930055864176
1	Deaths	68	Republic of Korea	1	Male	27	Age-standardized	441	Colon and rectum cancer	3	Rate	2014	18.25197602761961	21.147379733772734	15.150376061936313
1	Deaths	68	Republic of Korea	2	Female	27	Age-standardized	441	Colon and rectum cancer	3	Rate	2014	9.998959521809832	12.026677888520503	7.928687483123171
1	Deaths	68	Republic of Korea	3	Both	27	Age-standardized	441	Colon and rectum cancer	3	Rate	2014	13.360725261997342	15.013602345877734	11.498839778397052
1	Deaths	6	China	1	Male	22	All ages	441	Colon and rectum cancer	1	Number	2018	155974.5915353994	192135.47915574705	123593.90876033003
1	Deaths	6	China	2	Female	22	All ages	441	Colon and rectum cancer	1	Number	2018	89459.38836364435	109279.8612065374	70581.35332141725
1	Deaths	6	China	3	Both	22	All ages	441	Colon and rectum cancer	1	Number	2018	245433.97989904377	288303.0467538602	206258.89386911332
1	Deaths	6	China	1	Male	22	All ages	441	Colon and rectum cancer	3	Rate	2018	21.678628902494758	26.704565856645516	17.178095844000953
1	Deaths	6	China	2	Female	22	All ages	441	Colon and rectum cancer	3	Rate	2018	13.008758299809845	15.890957086515682	10.263604330710345
1	Deaths	6	China	3	Both	22	All ages	441	Colon and rectum cancer	3	Rate	2018	17.44165571770776	20.488126729295757	14.657695796890414
1	Deaths	6	China	1	Male	27	Age-standardized	441	Colon and rectum cancer	3	Rate	2018	18.638811322196883	22.70558300580599	15.03280692651356
1	Deaths	6	China	2	Female	27	Age-standardized	441	Colon and rectum cancer	3	Rate	2018	9.259406678273438	11.307461127996401	7.289112494340274
1	Deaths	6	China	3	Both	27	Age-standardized	441	Colon and rectum cancer	3	Rate	2018	13.461729455147706	15.753535778960048	11.296461529965319
1	Deaths	71	Australia	1	Male	22	All ages	441	Colon and rectum cancer	1	Number	2011	2915.3167395121945	3172.5235589884182	2647.601279725732
1	Deaths	71	Australia	2	Female	22	All ages	441	Colon and rectum cancer	1	Number	2011	2633.1063335660506	2991.823646842446	2212.5579756499287
1	Deaths	71	Australia	3	Both	22	All ages	441	Colon and rectum cancer	1	Number	2011	5548.423073078247	6122.615070416132	4885.8077784130655
1	Deaths	71	Australia	1	Male	22	All ages	441	Colon and rectum cancer	3	Rate	2011	26.901030501487885	29.27440160115043	24.430691120580526
1	Deaths	71	Australia	2	Female	22	All ages	441	Colon and rectum cancer	3	Rate	2011	23.799004623126088	27.041226514521696	19.99793051278469
1	Deaths	71	Australia	3	Both	22	All ages	441	Colon and rectum cancer	3	Rate	2011	25.333960010915384	27.955706209349245	22.30847526388519
1	Deaths	71	Australia	1	Male	27	Age-standardized	441	Colon and rectum cancer	3	Rate	2011	18.769615316665533	20.423568713112456	17.096040450339032
1	Deaths	71	Australia	2	Female	27	Age-standardized	441	Colon and rectum cancer	3	Rate	2011	13.190180649199796	14.881083869444149	11.338408953096122
1	Deaths	71	Australia	3	Both	27	Age-standardized	441	Colon and rectum cancer	3	Rate	2011	15.78252997167572	17.3393442287805	14.011316480117713
1	Deaths	71	Australia	1	Male	22	All ages	441	Colon and rectum cancer	1	Number	2012	2903.0653387619614	3187.772962098548	2646.150952614483
1	Deaths	71	Australia	2	Female	22	All ages	441	Colon and rectum cancer	1	Number	2012	2614.0153007196427	2969.9743675256973	2186.386355876517
1	Deaths	71	Australia	3	Both	22	All ages	441	Colon and rectum cancer	1	Number	2012	5517.080639481601	6134.866171246716	4870.691880328171
1	Deaths	71	Australia	1	Male	22	All ages	441	Colon and rectum cancer	3	Rate	2012	26.38897692541942	28.97698030322981	24.0536151554548
1	Deaths	71	Australia	2	Female	22	All ages	441	Colon and rectum cancer	3	Rate	2012	23.26892608749039	26.43753233604677	19.46234304733499
1	Deaths	71	Australia	3	Both	22	All ages	441	Colon and rectum cancer	3	Rate	2012	24.81261252831367	27.591051711454977	21.90553270266179
1	Deaths	71	Australia	1	Male	27	Age-standardized	441	Colon and rectum cancer	3	Rate	2012	18.113143459237282	19.859218759018148	16.514499580480827
1	Deaths	71	Australia	2	Female	27	Age-standardized	441	Colon and rectum cancer	3	Rate	2012	12.75065099364098	14.364003177603406	10.889271316359272
1	Deaths	71	Australia	3	Both	27	Age-standardized	441	Colon and rectum cancer	3	Rate	2012	15.234824375796421	16.86094871372182	13.509583708376393
1	Deaths	68	Republic of Korea	1	Male	22	All ages	441	Colon and rectum cancer	1	Number	2015	5408.496894655411	6214.906059056201	4548.688221073981
1	Deaths	68	Republic of Korea	2	Female	22	All ages	441	Colon and rectum cancer	1	Number	2015	4297.925631452277	5245.319918318796	3386.449639769505
1	Deaths	68	Republic of Korea	3	Both	22	All ages	441	Colon and rectum cancer	1	Number	2015	9706.42252610769	10942.675501377706	8361.784932917219
1	Deaths	68	Republic of Korea	1	Male	22	All ages	441	Colon and rectum cancer	3	Rate	2015	20.85858984549176	23.968614374581076	17.542622984984934
1	Deaths	68	Republic of Korea	2	Female	22	All ages	441	Colon and rectum cancer	3	Rate	2015	16.70137058396176	20.382863571717184	13.159453012360085
1	Deaths	68	Republic of Korea	3	Both	22	All ages	441	Colon and rectum cancer	3	Rate	2015	18.78784112703522	21.180743808710623	16.18514817745969
1	Deaths	68	Republic of Korea	1	Male	27	Age-standardized	441	Colon and rectum cancer	3	Rate	2015	18.037201442830764	20.613165379036943	14.983197578775886
1	Deaths	68	Republic of Korea	2	Female	27	Age-standardized	441	Colon and rectum cancer	3	Rate	2015	9.94303814722928	12.141689486348309	7.848077576166936
1	Deaths	68	Republic of Korea	3	Both	27	Age-standardized	441	Colon and rectum cancer	3	Rate	2015	13.250022273698837	15.007686086470844	11.321885897955186
1	Deaths	67	Japan	1	Male	22	All ages	441	Colon and rectum cancer	1	Number	2014	31394.62345431038	32684.186643487737	29114.510404804794
1	Deaths	67	Japan	2	Female	22	All ages	441	Colon and rectum cancer	1	Number	2014	28787.716438026542	32403.766730051786	22178.695395762905
1	Deaths	67	Japan	3	Both	22	All ages	441	Colon and rectum cancer	1	Number	2014	60182.33989233694	64895.40002119579	51340.363333976355
1	Deaths	67	Japan	1	Male	22	All ages	441	Colon and rectum cancer	3	Rate	2014	49.75186027057722	51.7954639370267	46.138506983979724
1	Deaths	67	Japan	2	Female	22	All ages	441	Colon and rectum cancer	3	Rate	2014	43.370827073196224	48.81867467309287	33.41384735359257
1	Deaths	67	Japan	3	Both	22	All ages	441	Colon and rectum cancer	3	Rate	2014	46.48068392787205	50.12072614913567	39.651751745407296
1	Deaths	67	Japan	1	Male	27	Age-standardized	441	Colon and rectum cancer	3	Rate	2014	21.461129607567514	22.280374346052476	20.064542637560695
1	Deaths	67	Japan	2	Female	27	Age-standardized	441	Colon and rectum cancer	3	Rate	2014	12.932584708823128	14.110430874598944	10.717687439392309
1	Deaths	67	Japan	3	Both	27	Age-standardized	441	Colon and rectum cancer	3	Rate	2014	16.79572064483812	17.84836934917958	14.895243654026647
1	Deaths	67	Japan	1	Male	22	All ages	441	Colon and rectum cancer	1	Number	2015	32165.19077273462	33509.40467917603	29692.88272750172
1	Deaths	67	Japan	2	Female	22	All ages	441	Colon and rectum cancer	1	Number	2015	29458.394384302264	33365.246896195335	22563.199494777702
1	Deaths	67	Japan	3	Both	22	All ages	441	Colon and rectum cancer	1	Number	2015	61623.5851570368	66743.21057436205	52388.42986616279
1	Deaths	67	Japan	1	Male	22	All ages	441	Colon and rectum cancer	3	Rate	2015	51.03724671145298	53.17014177993716	47.11437877192197
1	Deaths	67	Japan	2	Female	22	All ages	441	Colon and rectum cancer	3	Rate	2015	44.432646250862156	50.325424837183924	34.032495062708605
1	Deaths	67	Japan	3	Both	22	All ages	441	Colon and rectum cancer	3	Rate	2015	47.65129187021465	51.61011322741825	40.51007996067119
1	Deaths	67	Japan	1	Male	27	Age-standardized	441	Colon and rectum cancer	3	Rate	2015	21.465556770905017	22.278121595846798	19.988285300300703
1	Deaths	67	Japan	2	Female	27	Age-standardized	441	Colon and rectum cancer	3	Rate	2015	12.796068863827461	14.023933201320931	10.613194406214838
1	Deaths	67	Japan	3	Both	27	Age-standardized	441	Colon and rectum cancer	3	Rate	2015	16.732082929659082	17.78249742225016	14.836093844441441
1	Deaths	68	Republic of Korea	1	Male	22	All ages	441	Colon and rectum cancer	1	Number	2016	5559.627756662367	6388.939294342534	4674.0195454341565
1	Deaths	68	Republic of Korea	2	Female	22	All ages	441	Colon and rectum cancer	1	Number	2016	4460.354735179538	5539.649737307835	3486.432047178173
1	Deaths	68	Republic of Korea	3	Both	22	All ages	441	Colon and rectum cancer	1	Number	2016	10019.982491841905	11320.580250709621	8573.46169200378
1	Deaths	68	Republic of Korea	1	Male	22	All ages	441	Colon and rectum cancer	3	Rate	2016	21.338151369947248	24.52109380753348	17.93913926108611
1	Deaths	68	Republic of Korea	2	Female	22	All ages	441	Colon and rectum cancer	3	Rate	2016	17.277220066350093	21.457877968110417	13.504722673822977
1	Deaths	68	Republic of Korea	3	Both	22	All ages	441	Colon and rectum cancer	3	Rate	2016	19.317020835835308	21.824377912311583	16.52834605993698
1	Deaths	68	Republic of Korea	1	Male	27	Age-standardized	441	Colon and rectum cancer	3	Rate	2016	17.83797129976943	20.513302463138427	14.760053033953698
1	Deaths	68	Republic of Korea	2	Female	27	Age-standardized	441	Colon and rectum cancer	3	Rate	2016	9.91496342136616	12.299573116457347	7.786536772839097
1	Deaths	68	Republic of Korea	3	Both	27	Age-standardized	441	Colon and rectum cancer	3	Rate	2016	13.170905572882232	14.95051070033249	11.189446066872737
1	Deaths	68	Republic of Korea	1	Male	22	All ages	441	Colon and rectum cancer	1	Number	2017	5703.973040370641	6641.488016979609	4724.865769711328
1	Deaths	68	Republic of Korea	2	Female	22	All ages	441	Colon and rectum cancer	1	Number	2017	4561.799208377175	5703.3127441431925	3516.6358551457065
1	Deaths	68	Republic of Korea	3	Both	22	All ages	441	Colon and rectum cancer	1	Number	2017	10265.772248747806	11753.594035309829	8688.840825980405
1	Deaths	68	Republic of Korea	1	Male	22	All ages	441	Colon and rectum cancer	3	Rate	2017	21.850268516380034	25.441616833079394	18.09959216871345
1	Deaths	68	Republic of Korea	2	Female	22	All ages	441	Colon and rectum cancer	3	Rate	2017	17.647739143360052	22.063789080590826	13.60442873501134
1	Deaths	68	Republic of Korea	3	Both	22	All ages	441	Colon and rectum cancer	3	Rate	2017	19.759342303308173	22.623070355582517	16.724097899254254
1	Deaths	68	Republic of Korea	1	Male	27	Age-standardized	441	Colon and rectum cancer	3	Rate	2017	17.494760995286047	20.279082517131872	14.34534638734255
1	Deaths	68	Republic of Korea	2	Female	27	Age-standardized	441	Colon and rectum cancer	3	Rate	2017	9.687280360836313	12.129298284379551	7.522377904462011
1	Deaths	68	Republic of Korea	3	Both	27	Age-standardized	441	Colon and rectum cancer	3	Rate	2017	12.920260704808944	14.834551873869353	10.899569570160049
1	Deaths	71	Australia	1	Male	22	All ages	441	Colon and rectum cancer	1	Number	2013	2910.6202266968066	3204.0376907119803	2640.8908478832705
1	Deaths	71	Australia	2	Female	22	All ages	441	Colon and rectum cancer	1	Number	2013	2635.258224927616	2999.9692334614997	2210.7972003598575
1	Deaths	71	Australia	3	Both	22	All ages	441	Colon and rectum cancer	1	Number	2013	5545.878451624425	6114.468434109789	4888.797626805326
1	Deaths	71	Australia	1	Male	22	All ages	441	Colon and rectum cancer	3	Rate	2013	26.060081880000737	28.687179385584788	23.64507437306134
1	Deaths	71	Australia	2	Female	22	All ages	441	Colon and rectum cancer	3	Rate	2013	23.096428965018795	26.29289822244596	19.37628730693988
1	Deaths	71	Australia	3	Both	22	All ages	441	Colon and rectum cancer	3	Rate	2013	24.562443690483892	27.0807028895616	21.652262571208112
1	Deaths	71	Australia	1	Male	27	Age-standardized	441	Colon and rectum cancer	3	Rate	2013	17.596469257440962	19.333714344843855	15.9941789403118
1	Deaths	71	Australia	2	Female	27	Age-standardized	441	Colon and rectum cancer	3	Rate	2013	12.49935205626924	14.005452910382802	10.72864505847883
1	Deaths	71	Australia	3	Both	27	Age-standardized	441	Colon and rectum cancer	3	Rate	2013	14.888753745865918	16.345494821187327	13.221467438337447
1	Deaths	67	Japan	1	Male	22	All ages	441	Colon and rectum cancer	1	Number	2016	32771.588320202274	34188.383743037746	30188.649027986423
1	Deaths	67	Japan	2	Female	22	All ages	441	Colon and rectum cancer	1	Number	2016	30296.868961265798	34427.61931916043	23209.35623347274
1	Deaths	67	Japan	3	Both	22	All ages	441	Colon and rectum cancer	1	Number	2016	63068.4572814681	68440.71436469964	53587.606646762775
1	Deaths	67	Japan	1	Male	22	All ages	441	Colon and rectum cancer	3	Rate	2016	52.0698786980194	54.32098612333374	47.96591723249841
1	Deaths	67	Japan	2	Female	22	All ages	441	Colon and rectum cancer	3	Rate	2016	45.755448233164394	51.99385968110676	35.051625269377766
1	Deaths	67	Japan	3	Both	22	All ages	441	Colon and rectum cancer	3	Rate	2016	48.832553370438575	52.99217677086233	41.49173413095412
1	Deaths	67	Japan	1	Male	27	Age-standardized	441	Colon and rectum cancer	3	Rate	2016	21.38037791402287	22.228240619988284	19.8954069105579
1	Deaths	67	Japan	2	Female	27	Age-standardized	441	Colon and rectum cancer	3	Rate	2016	12.800551072207188	14.04067200637705	10.642307209931364
1	Deaths	67	Japan	3	Both	27	Age-standardized	441	Colon and rectum cancer	3	Rate	2016	16.714530475889372	17.802054629400835	14.828483125948571
1	Deaths	6	China	1	Male	22	All ages	441	Colon and rectum cancer	1	Number	2019	162707.97840350767	203780.48454202226	125814.11967717278
1	Deaths	6	China	2	Female	22	All ages	441	Colon and rectum cancer	1	Number	2019	93817.75942363654	118145.4526232814	73123.9143638931
1	Deaths	6	China	3	Both	22	All ages	441	Colon and rectum cancer	1	Number	2019	256525.7378271444	302908.39279704605	212967.7460264375
1	Deaths	6	China	1	Male	22	All ages	441	Colon and rectum cancer	3	Rate	2019	22.490020408066194	28.16719438766563	17.390432521663612
1	Deaths	6	China	2	Female	22	All ages	441	Colon and rectum cancer	3	Rate	2019	13.579020382048677	17.100168657552853	10.583829007030417
1	Deaths	6	China	3	Both	22	All ages	441	Colon and rectum cancer	3	Rate	2019	18.137106164239587	21.416493037829895	15.05743108647864
1	Deaths	6	China	1	Male	27	Age-standardized	441	Colon and rectum cancer	3	Rate	2019	18.826249499343664	23.20717937505477	14.79138261617807
1	Deaths	6	China	2	Female	27	Age-standardized	441	Colon and rectum cancer	3	Rate	2019	9.352515298606058	11.739783939672396	7.293012965820168
1	Deaths	6	China	3	Both	27	Age-standardized	441	Colon and rectum cancer	3	Rate	2019	13.592863959941912	15.979986441976385	11.307721408194295
1	Deaths	71	Australia	1	Male	22	All ages	441	Colon and rectum cancer	1	Number	2017	3259.877602650485	3625.677239247918	2924.9579474814946
1	Deaths	71	Australia	2	Female	22	All ages	441	Colon and rectum cancer	1	Number	2017	2844.592912043288	3297.577541752013	2397.0111714716695
1	Deaths	71	Australia	3	Both	22	All ages	441	Colon and rectum cancer	1	Number	2017	6104.470514693775	6858.519919335247	5329.836100135602
1	Deaths	71	Australia	1	Male	22	All ages	441	Colon and rectum cancer	3	Rate	2017	27.3723286931102	30.443851341882095	24.560097068335406
1	Deaths	71	Australia	2	Female	22	All ages	441	Colon and rectum cancer	3	Rate	2017	23.348351195548506	27.06643829892517	19.67461087814241
1	Deaths	71	Australia	3	Both	22	All ages	441	Colon and rectum cancer	3	Rate	2017	25.337468086892027	28.467256768818633	22.122238410438985
1	Deaths	71	Australia	1	Male	27	Age-standardized	441	Colon and rectum cancer	3	Rate	2017	17.34883060500595	19.282296922268053	15.538555277323969
1	Deaths	71	Australia	2	Female	27	Age-standardized	441	Colon and rectum cancer	3	Rate	2017	12.028584029554754	13.741718836785632	10.27850623523781
1	Deaths	71	Australia	3	Both	27	Age-standardized	441	Colon and rectum cancer	3	Rate	2017	14.502816233775008	16.210963876830036	12.802531063391857
1	Deaths	67	Japan	1	Male	22	All ages	441	Colon and rectum cancer	1	Number	2017	33031.42629190021	34542.20457476176	30315.381588626973
1	Deaths	67	Japan	2	Female	22	All ages	441	Colon and rectum cancer	1	Number	2017	30785.0152397524	35050.238453041326	23435.87675994554
1	Deaths	67	Japan	3	Both	22	All ages	441	Colon and rectum cancer	1	Number	2017	63816.44153165267	69336.18155258351	53772.81057770378
1	Deaths	67	Japan	1	Male	22	All ages	441	Colon and rectum cancer	3	Rate	2017	52.56587417897074	54.970111296297205	48.243588399511914
1	Deaths	67	Japan	2	Female	22	All ages	441	Colon and rectum cancer	3	Rate	2017	46.5627219265948	53.013925568643906	35.447057738343524
1	Deaths	67	Japan	3	Both	22	All ages	441	Colon and rectum cancer	3	Rate	2017	49.488021166710794	53.768438633345674	41.6994417769759
1	Deaths	67	Japan	1	Male	27	Age-standardized	441	Colon and rectum cancer	3	Rate	2017	21.013946436239127	21.864502372426692	19.50230851704122
1	Deaths	67	Japan	2	Female	27	Age-standardized	441	Colon and rectum cancer	3	Rate	2017	12.561362800193335	13.7604788465192	10.410695330064577
1	Deaths	67	Japan	3	Both	27	Age-standardized	441	Colon and rectum cancer	3	Rate	2017	16.43950449014998	17.495347686774043	14.53931946335222
1	Deaths	6	China	1	Male	22	All ages	441	Colon and rectum cancer	1	Number	2021	174399.8906804581	226279.72640672882	133841.75675576122
1	Deaths	6	China	2	Female	22	All ages	441	Colon and rectum cancer	1	Number	2021	100729.3423448955	128091.27436239256	76598.235588646
1	Deaths	6	China	3	Both	22	All ages	441	Colon and rectum cancer	1	Number	2021	275129.2330253538	330960.39370714145	223378.58217767245
1	Deaths	6	China	1	Male	22	All ages	441	Colon and rectum cancer	3	Rate	2021	23.95262502425808	31.077963501380825	18.38224439046585
1	Deaths	6	China	2	Female	22	All ages	441	Colon and rectum cancer	3	Rate	2021	14.50088971627496	18.439884545124286	11.027001079080213
1	Deaths	6	China	3	Both	22	All ages	441	Colon and rectum cancer	3	Rate	2021	19.33790305104853	23.262086463403115	15.700524870922914
1	Deaths	6	China	1	Male	27	Age-standardized	441	Colon and rectum cancer	3	Rate	2021	18.947942598241642	24.34471228059412	14.651450768742935
1	Deaths	6	China	2	Female	27	Age-standardized	441	Colon and rectum cancer	3	Rate	2021	9.3387826792789	11.879288771258112	7.101678634823698
1	Deaths	6	China	3	Both	27	Age-standardized	441	Colon and rectum cancer	3	Rate	2021	13.636681585714843	16.310060493601902	11.087946649504586
1	Deaths	68	Republic of Korea	1	Male	22	All ages	441	Colon and rectum cancer	1	Number	2018	5928.310275691599	6941.198962405387	4801.533945973857
1	Deaths	68	Republic of Korea	2	Female	22	All ages	441	Colon and rectum cancer	1	Number	2018	4714.636107919321	5837.181365478531	3578.511322491211
1	Deaths	68	Republic of Korea	3	Both	22	All ages	441	Colon and rectum cancer	1	Number	2018	10642.946383610917	12188.226621364962	8994.71155602818
1	Deaths	68	Republic of Korea	1	Male	22	All ages	441	Colon and rectum cancer	3	Rate	2018	22.71703877277143	26.598386154828667	18.39927867249515
1	Deaths	68	Republic of Korea	2	Female	22	All ages	441	Colon and rectum cancer	3	Rate	2018	18.243198742539775	22.58686721713304	13.846984531632746
1	Deaths	68	Republic of Korea	3	Both	22	All ages	441	Colon and rectum cancer	3	Rate	2018	20.491017595585852	23.46616784069929	17.317647399371772
1	Deaths	68	Republic of Korea	1	Male	27	Age-standardized	441	Colon and rectum cancer	3	Rate	2018	17.43522574315783	20.467536180528768	14.070048418728271
1	Deaths	68	Republic of Korea	2	Female	27	Age-standardized	441	Colon and rectum cancer	3	Rate	2018	9.615162241840828	11.880441834888948	7.3425968618317645
1	Deaths	68	Republic of Korea	3	Both	27	Age-standardized	441	Colon and rectum cancer	3	Rate	2018	12.870302754439964	14.848843434243214	10.852746067919185
1	Deaths	67	Japan	1	Male	22	All ages	441	Colon and rectum cancer	1	Number	2018	33245.530019599864	34825.49872947032	30446.435503839424
1	Deaths	67	Japan	2	Female	22	All ages	441	Colon and rectum cancer	1	Number	2018	31571.634499241613	35895.7645194025	23825.098784837366
1	Deaths	67	Japan	3	Both	22	All ages	441	Colon and rectum cancer	1	Number	2018	64817.16451884145	70504.59988372342	54312.73266012577
1	Deaths	67	Japan	1	Male	22	All ages	441	Colon and rectum cancer	3	Rate	2018	53.00860813712541	55.527802211067545	48.54556891840193
1	Deaths	67	Japan	2	Female	22	All ages	441	Colon and rectum cancer	3	Rate	2018	47.84167599243499	54.394191586097726	36.103061328019855
1	Deaths	67	Japan	3	Both	22	All ages	441	Colon and rectum cancer	3	Rate	2018	50.35941230113548	54.778240316867176	42.19803994106446
1	Deaths	67	Japan	1	Male	27	Age-standardized	441	Colon and rectum cancer	3	Rate	2018	20.646844295496106	21.504879774709718	19.16782898690316
1	Deaths	67	Japan	2	Female	27	Age-standardized	441	Colon and rectum cancer	3	Rate	2018	12.491148565038467	13.657447779999808	10.28057462507151
1	Deaths	67	Japan	3	Both	27	Age-standardized	441	Colon and rectum cancer	3	Rate	2018	16.251399554347323	17.308215182948086	14.318860143633561
1	Deaths	6	China	1	Male	22	All ages	441	Colon and rectum cancer	1	Number	1996	75643.4265611993	85733.2287209459	64378.76706803778
1	Deaths	6	China	2	Female	22	All ages	441	Colon and rectum cancer	1	Number	1996	58049.38166324738	66843.62765161078	51258.46933259128
1	Deaths	6	China	3	Both	22	All ages	441	Colon and rectum cancer	1	Number	1996	133692.8082244466	145654.26370390027	121828.24159032272
1	Deaths	6	China	1	Male	22	All ages	441	Colon and rectum cancer	3	Rate	1996	11.805556389680394	13.380256714251722	10.047497839153541
1	Deaths	6	China	2	Female	22	All ages	441	Colon and rectum cancer	3	Rate	1996	9.689307608022002	11.157198429946394	8.555803053355998
1	Deaths	6	China	3	Both	22	All ages	441	Colon and rectum cancer	3	Rate	1996	10.782965874093309	11.747714598818272	9.826031699205723
1	Deaths	6	China	1	Male	27	Age-standardized	441	Colon and rectum cancer	3	Rate	1996	18.142279828382225	20.57534677243385	15.541980835017352
1	Deaths	6	China	2	Female	27	Age-standardized	441	Colon and rectum cancer	3	Rate	1996	12.406946380403463	14.240742315321913	10.964902044522386
1	Deaths	6	China	3	Both	27	Age-standardized	441	Colon and rectum cancer	3	Rate	1996	14.870945043395274	16.289820346065905	13.506974427458909
1	Deaths	68	Republic of Korea	1	Male	22	All ages	441	Colon and rectum cancer	1	Number	2019	6064.750619962682	7205.8959165941515	4874.52233196455
1	Deaths	68	Republic of Korea	2	Female	22	All ages	441	Colon and rectum cancer	1	Number	2019	4771.53613416792	6054.719219420503	3561.988935897058
1	Deaths	68	Republic of Korea	3	Both	22	All ages	441	Colon and rectum cancer	1	Number	2019	10836.286754130599	12599.72474953256	9063.287107878306
1	Deaths	68	Republic of Korea	1	Male	22	All ages	441	Colon and rectum cancer	3	Rate	2019	23.286338592984144	27.667903050669157	18.716314093371174
1	Deaths	68	Republic of Korea	2	Female	22	All ages	441	Colon and rectum cancer	3	Rate	2019	18.489747049501187	23.462093479956565	13.802740368295138
1	Deaths	68	Republic of Korea	3	Both	22	All ages	441	Colon and rectum cancer	3	Rate	2019	20.899044485441145	24.3000405968789	17.479607613712567
1	Deaths	68	Republic of Korea	1	Male	27	Age-standardized	441	Colon and rectum cancer	3	Rate	2019	17.065611155263937	20.371950046769083	13.570397666679796
1	Deaths	68	Republic of Korea	2	Female	27	Age-standardized	441	Colon and rectum cancer	3	Rate	2019	9.359957756733888	11.81061056202547	7.069096568552504
1	Deaths	68	Republic of Korea	3	Both	27	Age-standardized	441	Colon and rectum cancer	3	Rate	2019	12.587170764253798	14.651107563135016	10.515696597704993
1	Deaths	71	Australia	1	Male	22	All ages	441	Colon and rectum cancer	1	Number	2014	2990.7778607071195	3293.560287165244	2704.56590995745
1	Deaths	71	Australia	2	Female	22	All ages	441	Colon and rectum cancer	1	Number	2014	2689.031253200438	3058.6957443538013	2259.90260200915
1	Deaths	71	Australia	3	Both	22	All ages	441	Colon and rectum cancer	1	Number	2014	5679.809113907552	6298.21821736751	5005.186636711494
1	Deaths	71	Australia	1	Male	22	All ages	441	Colon and rectum cancer	3	Rate	2014	26.372030952570075	29.041900763817107	23.848276004624474
1	Deaths	71	Australia	2	Female	22	All ages	441	Colon and rectum cancer	3	Rate	2014	23.20033615039551	26.389715391494168	19.497913968595174
1	Deaths	71	Australia	3	Both	22	All ages	441	Colon and rectum cancer	3	Rate	2014	24.768910598476275	27.465712460950396	21.826969506745446
1	Deaths	71	Australia	1	Male	27	Age-standardized	441	Colon and rectum cancer	3	Rate	2014	17.533967273422093	19.240409276483824	15.864274641774644
1	Deaths	71	Australia	2	Female	27	Age-standardized	441	Colon and rectum cancer	3	Rate	2014	12.423724420616551	14.009711257597534	10.731940910263223
1	Deaths	71	Australia	3	Both	27	Age-standardized	441	Colon and rectum cancer	3	Rate	2014	14.817159891143575	16.341719628704347	13.150818761892792
1	Deaths	6	China	1	Male	22	All ages	441	Colon and rectum cancer	1	Number	2002	91557.05368082356	102372.265235524	80086.06495816709
1	Deaths	6	China	2	Female	22	All ages	441	Colon and rectum cancer	1	Number	2002	63884.16421254374	72525.9387790892	56304.331357707764
1	Deaths	6	China	3	Both	22	All ages	441	Colon and rectum cancer	1	Number	2002	155441.21789336725	169272.3236099073	141568.15413489525
1	Deaths	6	China	1	Male	22	All ages	441	Colon and rectum cancer	3	Rate	2002	14.003975275125137	15.658200144956174	12.249446967417422
1	Deaths	6	China	2	Female	22	All ages	441	Colon and rectum cancer	3	Rate	2002	10.345621914394982	11.745100696608727	9.11811763603354
1	Deaths	6	China	3	Both	22	All ages	441	Colon and rectum cancer	3	Rate	2002	12.227019280366266	13.314975219960935	11.13576291766231
1	Deaths	6	China	1	Male	27	Age-standardized	441	Colon and rectum cancer	3	Rate	2002	18.6337374241752	20.633935466098116	16.53721937739254
1	Deaths	6	China	2	Female	27	Age-standardized	441	Colon and rectum cancer	3	Rate	2002	11.561590763081336	13.100687509561508	10.185862583091726
1	Deaths	6	China	3	Both	27	Age-standardized	441	Colon and rectum cancer	3	Rate	2002	14.637416793152418	15.891937201880184	13.422215427267746
1	Deaths	71	Australia	1	Male	22	All ages	441	Colon and rectum cancer	1	Number	2015	3179.4593392406327	3499.0607109317502	2875.5957627729076
1	Deaths	71	Australia	2	Female	22	All ages	441	Colon and rectum cancer	1	Number	2015	2843.969754073908	3238.2875710209178	2407.6320051792254
1	Deaths	71	Australia	3	Both	22	All ages	441	Colon and rectum cancer	1	Number	2015	6023.429093314544	6705.396001542183	5306.09549234551
1	Deaths	71	Australia	1	Male	22	All ages	441	Colon and rectum cancer	3	Rate	2015	27.600890870718796	30.375350815309652	24.963050747977928
1	Deaths	71	Australia	2	Female	22	All ages	441	Colon and rectum cancer	3	Rate	2015	24.146468865427707	27.494388749721562	20.441782536255694
1	Deaths	71	Australia	3	Both	22	All ages	441	Colon and rectum cancer	3	Rate	2015	25.85450894908954	28.7817318413328	22.77548075461453
1	Deaths	71	Australia	1	Male	27	Age-standardized	441	Colon and rectum cancer	3	Rate	2015	18.09126614806575	19.86202736663992	16.372058732452015
1	Deaths	71	Australia	2	Female	27	Age-standardized	441	Colon and rectum cancer	3	Rate	2015	12.788195150436515	14.396745158536024	11.01510345212136
1	Deaths	71	Australia	3	Both	27	Age-standardized	441	Colon and rectum cancer	3	Rate	2015	15.266002518110584	16.931353892393176	13.58055117462847
1	Deaths	68	Republic of Korea	1	Male	22	All ages	441	Colon and rectum cancer	1	Number	2021	6518.938588981448	7848.060662983455	5206.0562863815585
1	Deaths	68	Republic of Korea	2	Female	22	All ages	441	Colon and rectum cancer	1	Number	2021	5141.341339425974	6757.787748774871	3809.1863256983415
1	Deaths	68	Republic of Korea	3	Both	22	All ages	441	Colon and rectum cancer	1	Number	2021	11660.279928407414	13743.91171197515	9597.579672677562
1	Deaths	68	Republic of Korea	1	Male	22	All ages	441	Colon and rectum cancer	3	Rate	2021	25.186475720691792	30.321652312670956	20.114042871815318
1	Deaths	68	Republic of Korea	2	Female	22	All ages	441	Colon and rectum cancer	3	Rate	2021	20.014731827644198	26.307397352257816	14.828784505269553
1	Deaths	68	Republic of Korea	3	Both	22	All ages	441	Colon and rectum cancer	3	Rate	2021	22.610377010312362	26.65073457174277	18.610607645625276
1	Deaths	68	Republic of Korea	1	Male	27	Age-standardized	441	Colon and rectum cancer	3	Rate	2021	16.96218550940089	20.55658715972596	13.378524412463603
1	Deaths	68	Republic of Korea	2	Female	27	Age-standardized	441	Colon and rectum cancer	3	Rate	2021	9.370095078816943	12.201245212680407	7.058140540729055
1	Deaths	68	Republic of Korea	3	Both	27	Age-standardized	441	Colon and rectum cancer	3	Rate	2021	12.560993678630036	14.826316126390337	10.316211716621371
1	Deaths	71	Australia	1	Male	22	All ages	441	Colon and rectum cancer	1	Number	2016	3246.3807234429405	3593.90770494914	2923.0180087217705
1	Deaths	71	Australia	2	Female	22	All ages	441	Colon and rectum cancer	1	Number	2016	2858.6457570420516	3296.1911309009365	2428.2290166817743
1	Deaths	71	Australia	3	Both	22	All ages	441	Colon and rectum cancer	1	Number	2016	6105.026480484994	6826.116676890722	5350.49948852993
1	Deaths	71	Australia	1	Male	22	All ages	441	Colon and rectum cancer	3	Rate	2016	27.72700478951113	30.69519709398231	24.965197009210385
1	Deaths	71	Australia	2	Female	22	All ages	441	Colon and rectum cancer	3	Rate	2016	23.871386174406307	27.52514934617411	20.277151316953795
1	Deaths	71	Australia	3	Both	22	All ages	441	Colon and rectum cancer	3	Rate	2016	25.77747617943599	28.822161639931654	22.59160931644445
1	Deaths	71	Australia	1	Male	27	Age-standardized	441	Colon and rectum cancer	3	Rate	2016	17.88443550024976	19.766405915430127	16.123523126776604
1	Deaths	71	Australia	2	Female	27	Age-standardized	441	Colon and rectum cancer	3	Rate	2016	12.466752322573514	14.133987770707972	10.744676006803042
1	Deaths	71	Australia	3	Both	27	Age-standardized	441	Colon and rectum cancer	3	Rate	2016	14.997528752495176	16.678235353310882	13.306937121245863
1	Deaths	6	China	1	Male	22	All ages	441	Colon and rectum cancer	1	Number	1993	71274.31523890088	83933.78674124862	59040.89350602567
1	Deaths	6	China	2	Female	22	All ages	441	Colon and rectum cancer	1	Number	1993	55919.51693131816	65988.65267444162	47428.82599117046
1	Deaths	6	China	3	Both	22	All ages	441	Colon and rectum cancer	1	Number	1993	127193.83217021912	142564.64510758725	111722.69494425868
1	Deaths	6	China	1	Male	22	All ages	441	Colon and rectum cancer	3	Rate	1993	11.327485768469073	13.339430503378548	9.383252279668172
1	Deaths	6	China	2	Female	22	All ages	441	Colon and rectum cancer	3	Rate	1993	9.509628257378287	11.221977416398952	8.065708157205291
1	Deaths	6	China	3	Both	22	All ages	441	Colon and rectum cancer	3	Rate	1993	10.449310332419211	11.71206334255873	9.178315416147209
1	Deaths	6	China	1	Male	27	Age-standardized	441	Colon and rectum cancer	3	Rate	1993	18.40611351511919	21.304926506779893	15.447232403053603
1	Deaths	6	China	2	Female	27	Age-standardized	441	Colon and rectum cancer	3	Rate	1993	12.882339024730202	15.14007728871967	10.909446448492876
1	Deaths	6	China	3	Both	27	Age-standardized	441	Colon and rectum cancer	3	Rate	1993	15.241386001539167	16.917919456324206	13.468640193919896
1	Deaths	68	Republic of Korea	1	Male	22	All ages	441	Colon and rectum cancer	1	Number	1996	2587.3064784245717	3058.409707744836	2211.022968036747
1	Deaths	68	Republic of Korea	2	Female	22	All ages	441	Colon and rectum cancer	1	Number	1996	2362.238043479611	2719.0266766564687	1981.453050426819
1	Deaths	68	Republic of Korea	3	Both	22	All ages	441	Colon and rectum cancer	1	Number	1996	4949.544521904184	5488.708818385089	4406.840490664404
1	Deaths	68	Republic of Korea	1	Male	22	All ages	441	Colon and rectum cancer	3	Rate	1996	11.25919704274128	13.309299777233862	9.621721844994074
1	Deaths	68	Republic of Korea	2	Female	22	All ages	441	Colon and rectum cancer	3	Rate	1996	10.383469608839416	11.95177215125135	8.709688503764298
1	Deaths	68	Republic of Korea	3	Both	22	All ages	441	Colon and rectum cancer	3	Rate	1996	10.823530867181544	12.002560852590847	9.63676028498508
1	Deaths	68	Republic of Korea	1	Male	27	Age-standardized	441	Colon and rectum cancer	3	Rate	1996	19.521685317025423	22.84874992588506	16.7191078465584
1	Deaths	68	Republic of Korea	2	Female	27	Age-standardized	441	Colon and rectum cancer	3	Rate	1996	12.090295132459646	14.001353498678784	10.082566583496524
1	Deaths	68	Republic of Korea	3	Both	27	Age-standardized	441	Colon and rectum cancer	3	Rate	1996	14.800261057642178	16.525216027019052	13.106281190579862
1	Deaths	68	Republic of Korea	1	Male	22	All ages	441	Colon and rectum cancer	1	Number	2002	3276.5218277110066	3822.4905220631567	2837.3519130433197
1	Deaths	68	Republic of Korea	2	Female	22	All ages	441	Colon and rectum cancer	1	Number	2002	2916.5948708876904	3397.3210604809965	2412.961069730199
1	Deaths	68	Republic of Korea	3	Both	22	All ages	441	Colon and rectum cancer	1	Number	2002	6193.116698598707	6867.71303752544	5503.05206396407
1	Deaths	68	Republic of Korea	1	Male	22	All ages	441	Colon and rectum cancer	3	Rate	2002	13.835733207034876	16.141189294817643	11.981255168613469
1	Deaths	68	Republic of Korea	2	Female	22	All ages	441	Colon and rectum cancer	3	Rate	2002	12.386731269418513	14.428367625602426	10.24780665722687
1	Deaths	68	Republic of Korea	3	Both	22	All ages	441	Colon and rectum cancer	3	Rate	2002	13.113310419388517	14.541701265330603	11.65216699132212
1	Deaths	68	Republic of Korea	1	Male	27	Age-standardized	441	Colon and rectum cancer	3	Rate	2002	20.01726381368415	23.00683729836003	17.38974509253938
1	Deaths	68	Republic of Korea	2	Female	27	Age-standardized	441	Colon and rectum cancer	3	Rate	2002	12.091946465816465	14.16093649148431	9.954408277914961
1	Deaths	68	Republic of Korea	3	Both	27	Age-standardized	441	Colon and rectum cancer	3	Rate	2002	15.036316009070706	16.69049539941721	13.25017220723722
1	Deaths	67	Japan	1	Male	22	All ages	441	Colon and rectum cancer	1	Number	2021	34809.34556303681	36619.69272071537	31701.050890392748
1	Deaths	67	Japan	2	Female	22	All ages	441	Colon and rectum cancer	1	Number	2021	33114.26108003364	37932.00566633802	24556.46311266819
1	Deaths	67	Japan	3	Both	22	All ages	441	Colon and rectum cancer	1	Number	2021	67923.60664307044	74359.76283882713	56450.94118855369
1	Deaths	67	Japan	1	Male	22	All ages	441	Colon and rectum cancer	3	Rate	2021	55.950002064588254	58.85982198712341	50.95395601606803
1	Deaths	67	Japan	2	Female	22	All ages	441	Colon and rectum cancer	3	Rate	2021	50.56973711668281	57.92705294613471	37.50087858285036
1	Deaths	67	Japan	3	Both	22	All ages	441	Colon and rectum cancer	3	Rate	2021	53.19103969895309	58.23119961737639	44.20678468359802
1	Deaths	67	Japan	1	Male	27	Age-standardized	441	Colon and rectum cancer	3	Rate	2021	20.243246739397183	21.17217739373703	18.752567704572964
1	Deaths	67	Japan	2	Female	27	Age-standardized	441	Colon and rectum cancer	3	Rate	2021	12.1691210068055	13.423174505932597	9.929156837406326
1	Deaths	67	Japan	3	Both	27	Age-standardized	441	Colon and rectum cancer	3	Rate	2021	15.891993014467532	16.96698147135226	13.968633816064672
1	Deaths	67	Japan	1	Male	22	All ages	441	Colon and rectum cancer	1	Number	2019	33768.41284305275	35413.42148053236	30885.491867346787
1	Deaths	67	Japan	2	Female	22	All ages	441	Colon and rectum cancer	1	Number	2019	32404.520482083542	36966.9399840888	24422.01112802266
1	Deaths	67	Japan	3	Both	22	All ages	441	Colon and rectum cancer	1	Number	2019	66172.93332513633	72152.94597052444	55424.3038716863
1	Deaths	67	Japan	1	Male	22	All ages	441	Colon and rectum cancer	3	Rate	2019	53.969476793782604	56.598568539925836	49.36192424401324
1	Deaths	67	Japan	2	Female	22	All ages	441	Colon and rectum cancer	3	Rate	2019	49.21808844938322	56.147787246100286	37.09373525448186
1	Deaths	67	Japan	3	Both	22	All ages	441	Colon and rectum cancer	3	Rate	2019	51.53329919521017	56.19033592247385	43.16262088718545
1	Deaths	67	Japan	1	Male	27	Age-standardized	441	Colon and rectum cancer	3	Rate	2019	20.472058261473652	21.353551264148116	18.966137972848717
1	Deaths	67	Japan	2	Female	27	Age-standardized	441	Colon and rectum cancer	3	Rate	2019	12.472019119512877	13.69059959438561	10.288923188345683
1	Deaths	67	Japan	3	Both	27	Age-standardized	441	Colon and rectum cancer	3	Rate	2019	16.1579358651194	17.244235274953056	14.262138983804537
1	Deaths	68	Republic of Korea	1	Male	22	All ages	441	Colon and rectum cancer	1	Number	1993	2233.154473869637	2664.706197849594	1901.9185448026742
1	Deaths	68	Republic of Korea	2	Female	22	All ages	441	Colon and rectum cancer	1	Number	1993	2146.8442363428067	2528.155242022051	1769.5901694128177
1	Deaths	68	Republic of Korea	3	Both	22	All ages	441	Colon and rectum cancer	1	Number	1993	4379.998710212444	4901.471682083363	3845.922370803325
1	Deaths	68	Republic of Korea	1	Male	22	All ages	441	Colon and rectum cancer	3	Rate	1993	9.855271954775107	11.759779525630586	8.393474215144987
1	Deaths	68	Republic of Korea	2	Female	22	All ages	441	Colon and rectum cancer	3	Rate	1993	9.568994767489963	11.268588504363374	7.887483770391732
1	Deaths	68	Republic of Korea	3	Both	22	All ages	441	Colon and rectum cancer	3	Rate	1993	9.71284459703169	10.869234420965876	8.528506237402196
1	Deaths	68	Republic of Korea	1	Male	27	Age-standardized	441	Colon and rectum cancer	3	Rate	1993	19.2863994261141	22.595156433272972	16.550552858735237
1	Deaths	68	Republic of Korea	2	Female	27	Age-standardized	441	Colon and rectum cancer	3	Rate	1993	12.237592294176807	14.473000401507766	9.961698130094515
1	Deaths	68	Republic of Korea	3	Both	27	Age-standardized	441	Colon and rectum cancer	3	Rate	1993	14.66581031721885	16.35254739191121	12.739061321423948
1	Deaths	6	China	1	Male	22	All ages	441	Colon and rectum cancer	1	Number	2020	168710.92111643596	213015.03464616352	134386.23513485875
1	Deaths	6	China	2	Female	22	All ages	441	Colon and rectum cancer	1	Number	2020	97557.62291227165	126747.05422924527	75887.40843210349
1	Deaths	6	China	3	Both	22	All ages	441	Colon and rectum cancer	1	Number	2020	266268.5440287072	315829.81956665113	223820.9246007566
1	Deaths	6	China	1	Male	22	All ages	441	Colon and rectum cancer	3	Rate	2020	23.228649449838738	29.328578936073086	18.502718888464003
1	Deaths	6	China	2	Female	22	All ages	441	Colon and rectum cancer	3	Rate	2020	14.073934837885574	18.284883629446878	10.947729243565716
1	Deaths	6	China	3	Both	22	All ages	441	Colon and rectum cancer	3	Rate	2020	18.758111935471547	22.24960942946491	15.767757969597326
1	Deaths	6	China	1	Male	27	Age-standardized	441	Colon and rectum cancer	3	Rate	2020	18.91990736649324	23.668953245424937	15.169098722179703
1	Deaths	6	China	2	Female	27	Age-standardized	441	Colon and rectum cancer	3	Rate	2020	9.385682984150993	12.175644961531038	7.3053704717856585
1	Deaths	6	China	3	Both	27	Age-standardized	441	Colon and rectum cancer	3	Rate	2020	13.652878647118989	16.0978848279494	11.500664398609542
1	Deaths	71	Australia	1	Male	22	All ages	441	Colon and rectum cancer	1	Number	2018	3258.669741569969	3639.923794395004	2912.5004716986123
1	Deaths	71	Australia	2	Female	22	All ages	441	Colon and rectum cancer	1	Number	2018	2902.044717618645	3378.5085555362266	2421.528972012568
1	Deaths	71	Australia	3	Both	22	All ages	441	Colon and rectum cancer	1	Number	2018	6160.714459188622	6926.661458539266	5356.847324148875
1	Deaths	71	Australia	1	Male	22	All ages	441	Colon and rectum cancer	3	Rate	2018	26.890127012941807	30.036186821913056	24.033582357289333
1	Deaths	71	Australia	2	Female	22	All ages	441	Colon and rectum cancer	3	Rate	2018	23.405991017875824	27.248836113589142	19.530465889912684
1	Deaths	71	Australia	3	Both	22	All ages	441	Colon and rectum cancer	3	Rate	2018	25.128144836884125	28.252267414640276	21.84935470098322
1	Deaths	71	Australia	1	Male	27	Age-standardized	441	Colon and rectum cancer	3	Rate	2018	16.779804407964548	18.71863419037656	14.99685095728674
1	Deaths	71	Australia	2	Female	27	Age-standardized	441	Colon and rectum cancer	3	Rate	2018	11.963708135955603	13.862304857274921	10.167693084068748
1	Deaths	71	Australia	3	Both	27	Age-standardized	441	Colon and rectum cancer	3	Rate	2018	14.214678581847968	15.946703161796224	12.541221739582241
1	Deaths	68	Republic of Korea	1	Male	22	All ages	441	Colon and rectum cancer	1	Number	2020	6190.649315357744	7392.350088124371	4963.700770720221
1	Deaths	68	Republic of Korea	2	Female	22	All ages	441	Colon and rectum cancer	1	Number	2020	4771.827535693197	6158.224472409307	3489.411509903371
1	Deaths	68	Republic of Korea	3	Both	22	All ages	441	Colon and rectum cancer	1	Number	2020	10962.476851050924	12818.212375465326	9072.60865965827
1	Deaths	68	Republic of Korea	1	Male	22	All ages	441	Colon and rectum cancer	3	Rate	2020	23.838264213382324	28.465639964673997	19.11366714878445
1	Deaths	68	Republic of Korea	2	Female	22	All ages	441	Colon and rectum cancer	3	Rate	2020	18.529057761153016	23.912452011709668	13.549422508632103
1	Deaths	68	Republic of Korea	3	Both	22	All ages	441	Colon and rectum cancer	3	Rate	2020	21.194755539405154	24.782618147478317	17.54090113565104
1	Deaths	68	Republic of Korea	1	Male	27	Age-standardized	441	Colon and rectum cancer	3	Rate	2020	16.77060715425673	20.157706733752043	13.23841479452879
1	Deaths	68	Republic of Korea	2	Female	27	Age-standardized	441	Colon and rectum cancer	3	Rate	2020	9.02058818756378	11.547009970397486	6.712799027304553
1	Deaths	68	Republic of Korea	3	Both	27	Age-standardized	441	Colon and rectum cancer	3	Rate	2020	12.252479694513626	14.36958846011293	10.123733022985583
1	Deaths	67	Japan	1	Male	22	All ages	441	Colon and rectum cancer	1	Number	1996	20585.43172876676	21231.09749896571	19709.907569297662
1	Deaths	67	Japan	2	Female	22	All ages	441	Colon and rectum cancer	1	Number	1996	17210.060037032847	18431.882309266082	15063.380222151114
1	Deaths	67	Japan	3	Both	22	All ages	441	Colon and rectum cancer	1	Number	1996	37795.49176579964	39522.39434625975	34907.50169112792
1	Deaths	67	Japan	1	Male	22	All ages	441	Colon and rectum cancer	3	Rate	1996	32.78763085322359	33.816020794555804	31.393131902607113
1	Deaths	67	Japan	2	Female	22	All ages	441	Colon and rectum cancer	3	Rate	1996	26.41641853831278	28.29184305474634	23.121392702514424
1	Deaths	67	Japan	3	Both	22	All ages	441	Colon and rectum cancer	3	Rate	1996	29.54313579796795	30.89298243471841	27.285716222958886
1	Deaths	67	Japan	1	Male	27	Age-standardized	441	Colon and rectum cancer	3	Rate	1996	24.383891342119593	25.201424689416545	23.176090313951928
1	Deaths	67	Japan	2	Female	27	Age-standardized	441	Colon and rectum cancer	3	Rate	1996	14.505038440733422	15.472271769826566	12.857394163864164
1	Deaths	67	Japan	3	Both	27	Age-standardized	441	Colon and rectum cancer	3	Rate	1996	18.639336183747844	19.511317636106963	17.20010271485852
1	Deaths	67	Japan	1	Male	22	All ages	441	Colon and rectum cancer	1	Number	2002	23625.817773192855	24578.288529903373	22341.5328390685
1	Deaths	67	Japan	2	Female	22	All ages	441	Colon and rectum cancer	1	Number	2002	20251.383940421172	22221.341982280286	16811.081085858375
1	Deaths	67	Japan	3	Both	22	All ages	441	Colon and rectum cancer	1	Number	2002	43877.201713614	46698.43735777184	39168.87573736729
1	Deaths	67	Japan	1	Male	22	All ages	441	Colon and rectum cancer	3	Rate	2002	37.30402035082872	38.80792547838849	35.27619673097507
1	Deaths	67	Japan	2	Female	22	All ages	441	Colon and rectum cancer	3	Rate	2002	30.647607890545036	33.62886101405225	25.441195666000038
1	Deaths	67	Japan	3	Both	22	All ages	441	Colon and rectum cancer	3	Rate	2002	33.90521758483934	36.08527020071973	30.266954194048292
1	Deaths	67	Japan	1	Male	27	Age-standardized	441	Colon and rectum cancer	3	Rate	2002	22.926399872176923	23.88020446764549	21.557560021114465
1	Deaths	67	Japan	2	Female	27	Age-standardized	441	Colon and rectum cancer	3	Rate	2002	13.603704988866602	14.722973667050566	11.661173172876866
1	Deaths	67	Japan	3	Both	27	Age-standardized	441	Colon and rectum cancer	3	Rate	2002	17.574973212590717	18.64484716897578	15.839872873995
1	Deaths	67	Japan	1	Male	22	All ages	441	Colon and rectum cancer	1	Number	1993	19170.854209087258	19719.08635428438	18435.14039552755
1	Deaths	67	Japan	2	Female	22	All ages	441	Colon and rectum cancer	1	Number	1993	16292.562702735046	17305.415634249606	14502.84835971881
1	Deaths	67	Japan	3	Both	22	All ages	441	Colon and rectum cancer	1	Number	1993	35463.41691182232	36941.29563340023	33078.54151883286
1	Deaths	67	Japan	1	Male	22	All ages	441	Colon and rectum cancer	3	Rate	1993	30.74035819252132	31.619445390838507	29.560645180813623
1	Deaths	67	Japan	2	Female	22	All ages	441	Colon and rectum cancer	3	Rate	1993	25.225733660304957	26.79393129462532	22.454723465734613
1	Deaths	67	Japan	3	Both	22	All ages	441	Colon and rectum cancer	3	Rate	1993	27.93475743314826	29.098891834115346	26.056176026932
1	Deaths	67	Japan	1	Male	27	Age-standardized	441	Colon and rectum cancer	3	Rate	1993	24.94181543148344	25.729883200877588	23.870966367973963
1	Deaths	67	Japan	2	Female	27	Age-standardized	441	Colon and rectum cancer	3	Rate	1993	15.279067251258903	16.19925622175366	13.651042261432767
1	Deaths	67	Japan	3	Both	27	Age-standardized	441	Colon and rectum cancer	3	Rate	1993	19.319457526893796	20.151125480507737	17.936448763958737
1	Deaths	71	Australia	1	Male	22	All ages	441	Colon and rectum cancer	1	Number	2021	3620.1212865565512	4096.650021229225	3175.0786532995435
1	Deaths	71	Australia	2	Female	22	All ages	441	Colon and rectum cancer	1	Number	2021	3053.7324214481246	3624.446557385872	2504.264074376605
1	Deaths	71	Australia	3	Both	22	All ages	441	Colon and rectum cancer	1	Number	2021	6673.8537080046735	7639.433001748397	5734.162717462478
1	Deaths	71	Australia	1	Male	22	All ages	441	Colon and rectum cancer	3	Rate	2021	28.406671363566815	32.14593700955817	24.914473499187128
1	Deaths	71	Australia	2	Female	22	All ages	441	Colon and rectum cancer	3	Rate	2021	23.403774051434063	27.777721353310792	19.192654258175125
1	Deaths	71	Australia	3	Both	22	All ages	441	Colon and rectum cancer	3	Rate	2021	25.87572725658864	29.619451279120725	22.232376826599484
1	Deaths	71	Australia	1	Male	27	Age-standardized	441	Colon and rectum cancer	3	Rate	2021	16.77896859975206	18.970813713450354	14.745597271569652
1	Deaths	71	Australia	2	Female	27	Age-standardized	441	Colon and rectum cancer	3	Rate	2021	11.498858793128772	13.512555676719662	9.602756335290758
1	Deaths	71	Australia	3	Both	27	Age-standardized	441	Colon and rectum cancer	3	Rate	2021	13.97701670678655	15.896187655009792	12.192520256339595
1	Deaths	71	Australia	1	Male	22	All ages	441	Colon and rectum cancer	1	Number	2019	3450.3155678452663	3871.1396122725114	3068.383025135737
1	Deaths	71	Australia	2	Female	22	All ages	441	Colon and rectum cancer	1	Number	2019	3016.750257317846	3533.711153602863	2507.1819886457315
1	Deaths	71	Australia	3	Both	22	All ages	441	Colon and rectum cancer	1	Number	2019	6467.065825163104	7299.912124946103	5614.106234381917
1	Deaths	71	Australia	1	Male	22	All ages	441	Colon and rectum cancer	3	Rate	2019	27.98664174389125	31.400083655801815	24.888661564118742
1	Deaths	71	Australia	2	Female	22	All ages	441	Colon and rectum cancer	3	Rate	2019	23.912566811520485	28.010308061851845	19.873423949066144
1	Deaths	71	Australia	3	Both	22	All ages	441	Colon and rectum cancer	3	Rate	2019	25.92614101750885	29.264979866197944	22.50666899871705
1	Deaths	71	Australia	1	Male	27	Age-standardized	441	Colon and rectum cancer	3	Rate	2019	17.214000396648025	19.301366287106184	15.368588178512509
1	Deaths	71	Australia	2	Female	27	Age-standardized	441	Colon and rectum cancer	3	Rate	2019	12.090186588464164	13.969034190946195	10.27245862164658
1	Deaths	71	Australia	3	Both	27	Age-standardized	441	Colon and rectum cancer	3	Rate	2019	14.493000533696732	16.31936105118268	12.766508798375408
1	Deaths	67	Japan	1	Male	22	All ages	441	Colon and rectum cancer	1	Number	2020	33723.167408715555	35491.93330479365	30717.79367428097
1	Deaths	67	Japan	2	Female	22	All ages	441	Colon and rectum cancer	1	Number	2020	31628.23459757721	36228.989010283185	23567.91741414838
1	Deaths	67	Japan	3	Both	22	All ages	441	Colon and rectum cancer	1	Number	2020	65351.4020062928	71452.37925470715	54485.776042792655
1	Deaths	67	Japan	1	Male	22	All ages	441	Colon and rectum cancer	3	Rate	2020	54.03911574501769	56.87344455599708	49.223205746890606
1	Deaths	67	Japan	2	Female	22	All ages	441	Colon and rectum cancer	3	Rate	2020	48.16086448620181	55.16651347748637	35.88727892171838
1	Deaths	67	Japan	3	Both	22	All ages	441	Colon and rectum cancer	3	Rate	2020	51.0250196479105	55.78853618183003	42.541364190586805
1	Deaths	67	Japan	1	Male	27	Age-standardized	441	Colon and rectum cancer	3	Rate	2020	20.060486395208	20.986717730144964	18.572609604266617
1	Deaths	67	Japan	2	Female	27	Age-standardized	441	Colon and rectum cancer	3	Rate	2020	12.006330752688445	13.207050588702206	9.842062222043381
1	Deaths	67	Japan	3	Both	27	Age-standardized	441	Colon and rectum cancer	3	Rate	2020	15.710848119541092	16.809323433376136	13.848902051253713
1	Deaths	71	Australia	1	Male	22	All ages	441	Colon and rectum cancer	1	Number	1996	2665.9879879256555	2860.6256833802922	2482.4859020520676
1	Deaths	71	Australia	2	Female	22	All ages	441	Colon and rectum cancer	1	Number	1996	2417.2164122691606	2664.085778747465	2113.485429713496
1	Deaths	71	Australia	3	Both	22	All ages	441	Colon and rectum cancer	1	Number	1996	5083.204400194823	5482.751475970049	4596.8894168638735
1	Deaths	71	Australia	1	Male	22	All ages	441	Colon and rectum cancer	3	Rate	1996	29.772331886011735	31.945941854567025	27.723078465836053
1	Deaths	71	Australia	2	Female	22	All ages	441	Colon and rectum cancer	3	Rate	1996	26.50283564272183	29.20955987799843	23.172669477451354
1	Deaths	71	Australia	3	Both	22	All ages	441	Colon and rectum cancer	3	Rate	1996	28.122569279655224	30.33304311355062	25.43205641931565
1	Deaths	71	Australia	1	Male	27	Age-standardized	441	Colon and rectum cancer	3	Rate	1996	27.004084532643546	29.033969042782026	25.03146027552027
1	Deaths	71	Australia	2	Female	27	Age-standardized	441	Colon and rectum cancer	3	Rate	1996	18.570048032827792	20.49254031455822	16.350410365055687
1	Deaths	71	Australia	3	Both	27	Age-standardized	441	Colon and rectum cancer	3	Rate	1996	22.339631793469515	24.08583811094966	20.214801982217857
1	Deaths	71	Australia	1	Male	22	All ages	441	Colon and rectum cancer	1	Number	2002	2766.378860018305	2964.412878329198	2554.736504914999
1	Deaths	71	Australia	2	Female	22	All ages	441	Colon and rectum cancer	1	Number	2002	2564.176257017816	2838.674987811695	2198.8769574708717
1	Deaths	71	Australia	3	Both	22	All ages	441	Colon and rectum cancer	1	Number	2002	5330.555117036123	5765.767150641193	4759.200193319035
1	Deaths	71	Australia	1	Male	22	All ages	441	Colon and rectum cancer	3	Rate	2002	28.94446788718711	31.01648678756732	26.730065717118542
1	Deaths	71	Australia	2	Female	22	All ages	441	Colon and rectum cancer	3	Rate	2002	26.228539783533673	29.036342430271446	22.49195296160936
1	Deaths	71	Australia	3	Both	22	All ages	441	Colon and rectum cancer	3	Rate	2002	27.571139768276865	29.822179583813625	24.615930392662005
1	Deaths	71	Australia	1	Male	27	Age-standardized	441	Colon and rectum cancer	3	Rate	2002	23.324003360076915	25.011004530208098	21.504418330304407
1	Deaths	71	Australia	2	Female	27	Age-standardized	441	Colon and rectum cancer	3	Rate	2002	16.45775463611131	18.177089981742693	14.364482823298218
1	Deaths	71	Australia	3	Both	27	Age-standardized	441	Colon and rectum cancer	3	Rate	2002	19.604919946875622	21.228147987354788	17.581041754097022
1	Deaths	71	Australia	1	Male	22	All ages	441	Colon and rectum cancer	1	Number	1993	2506.298566336961	2692.785481555811	2320.4617099741313
1	Deaths	71	Australia	2	Female	22	All ages	441	Colon and rectum cancer	1	Number	1993	2352.0002411554256	2593.9038217374723	2063.8453202685128
1	Deaths	71	Australia	3	Both	22	All ages	441	Colon and rectum cancer	1	Number	1993	4858.29880749238	5268.462448712984	4395.092045951529
1	Deaths	71	Australia	1	Male	22	All ages	441	Colon and rectum cancer	3	Rate	1993	28.847593363283572	30.99406496489691	26.708603964226835
1	Deaths	71	Australia	2	Female	22	All ages	441	Colon and rectum cancer	3	Rate	1993	26.67026633193742	29.41330725849923	23.402763059430576
1	Deaths	71	Australia	3	Both	22	All ages	441	Colon and rectum cancer	3	Rate	1993	27.750799648003543	30.093670986599413	25.10494385681649
1	Deaths	71	Australia	1	Male	27	Age-standardized	441	Colon and rectum cancer	3	Rate	1993	27.601501504830374	29.76247664941561	25.469869508825663
1	Deaths	71	Australia	2	Female	27	Age-standardized	441	Colon and rectum cancer	3	Rate	1993	19.654591533144462	21.713821123674776	17.351586782782057
1	Deaths	71	Australia	3	Both	27	Age-standardized	441	Colon and rectum cancer	3	Rate	1993	23.17285553304045	25.153292459907277	20.95764653362361
1	Deaths	71	Australia	1	Male	22	All ages	441	Colon and rectum cancer	1	Number	2020	3361.672923302979	3795.9969578022583	2967.4861823614115
1	Deaths	71	Australia	2	Female	22	All ages	441	Colon and rectum cancer	1	Number	2020	2888.69336797839	3430.69512481763	2353.425976197177
1	Deaths	71	Australia	3	Both	22	All ages	441	Colon and rectum cancer	1	Number	2020	6250.366291281369	7125.753684998466	5361.929376989345
1	Deaths	71	Australia	1	Male	22	All ages	441	Colon and rectum cancer	3	Rate	2020	26.81322284220716	30.277458473826304	23.66912846793207
1	Deaths	71	Australia	2	Female	22	All ages	441	Colon and rectum cancer	3	Rate	2020	22.51053725881835	26.734159910125666	18.339393066191935
1	Deaths	71	Australia	3	Both	22	All ages	441	Colon and rectum cancer	3	Rate	2020	24.636842597794992	28.087325405688286	21.134922966938284
1	Deaths	71	Australia	1	Male	27	Age-standardized	441	Colon and rectum cancer	3	Rate	2020	16.188035397002626	18.243650845078953	14.3131684997869
1	Deaths	71	Australia	2	Female	27	Age-standardized	441	Colon and rectum cancer	3	Rate	2020	11.261746887831295	13.14957929191926	9.46352597504454
1	Deaths	71	Australia	3	Both	27	Age-standardized	441	Colon and rectum cancer	3	Rate	2020	13.574737397550166	15.368189331359817	11.848687762319612
2	DALYs (Disability-Adjusted Life Years)	6	China	1	Male	22	All ages	441	Colon and rectum cancer	1	Number	1990	2039861.3227883573	2481119.6684362367	1602505.2521694498
2	DALYs (Disability-Adjusted Life Years)	6	China	2	Female	22	All ages	441	Colon and rectum cancer	1	Number	1990	1525334.3755200305	1884417.5975844173	1200992.9318502753
2	DALYs (Disability-Adjusted Life Years)	6	China	3	Both	22	All ages	441	Colon and rectum cancer	1	Number	1990	3565195.6983083873	4106701.237500457	3027610.192299868
2	DALYs (Disability-Adjusted Life Years)	6	China	1	Male	22	All ages	441	Colon and rectum cancer	3	Rate	1990	336.1453300242334	408.8595535681163	264.0741558449345
2	DALYs (Disability-Adjusted Life Years)	6	China	2	Female	22	All ages	441	Colon and rectum cancer	3	Rate	1990	267.7817920115957	330.821050962878	210.8416650444157
2	DALYs (Disability-Adjusted Life Years)	6	China	3	Both	22	All ages	441	Colon and rectum cancer	3	Rate	1990	303.04500205903844	349.073484399378	257.3497262421851
2	DALYs (Disability-Adjusted Life Years)	6	China	1	Male	27	Age-standardized	441	Colon and rectum cancer	3	Rate	1990	454.0958868016015	547.9904700822767	360.3448741791847
2	DALYs (Disability-Adjusted Life Years)	6	China	2	Female	27	Age-standardized	441	Colon and rectum cancer	3	Rate	1990	334.187554909703	410.1521553394212	263.36704336007904
2	DALYs (Disability-Adjusted Life Years)	6	China	3	Both	27	Age-standardized	441	Colon and rectum cancer	3	Rate	1990	390.6298370083371	448.9241314166973	333.238626147918
2	DALYs (Disability-Adjusted Life Years)	71	Australia	1	Male	22	All ages	441	Colon and rectum cancer	1	Number	1990	57970.83342837907	63083.8112324777	53171.009454349485
2	DALYs (Disability-Adjusted Life Years)	71	Australia	2	Female	22	All ages	441	Colon and rectum cancer	1	Number	1990	48558.08902568316	53387.30707639846	43784.41828824757
2	DALYs (Disability-Adjusted Life Years)	71	Australia	3	Both	22	All ages	441	Colon and rectum cancer	1	Number	1990	106528.92245406224	116426.58447659323	97307.09439776924
2	DALYs (Disability-Adjusted Life Years)	71	Australia	1	Male	22	All ages	441	Colon and rectum cancer	3	Rate	1990	691.5815848012962	752.578487617625	634.3205506844123
2	DALYs (Disability-Adjusted Life Years)	71	Australia	2	Female	22	All ages	441	Colon and rectum cancer	3	Rate	1990	572.846314391994	629.8172499715298	516.5306779464469
2	DALYs (Disability-Adjusted Life Years)	71	Australia	3	Both	22	All ages	441	Colon and rectum cancer	3	Rate	1990	631.8819562106361	690.5904636904296	577.1821937629186
2	DALYs (Disability-Adjusted Life Years)	71	Australia	1	Male	27	Age-standardized	441	Colon and rectum cancer	3	Rate	1990	654.8749018165648	712.9297167348033	600.7318078545514
2	DALYs (Disability-Adjusted Life Years)	71	Australia	2	Female	27	Age-standardized	441	Colon and rectum cancer	3	Rate	1990	466.49000656166794	512.2916464815356	420.83715790554413
2	DALYs (Disability-Adjusted Life Years)	71	Australia	3	Both	27	Age-standardized	441	Colon and rectum cancer	3	Rate	1990	552.2653116899656	602.8897046980342	505.7356166930191
2	DALYs (Disability-Adjusted Life Years)	68	Republic of Korea	1	Male	22	All ages	441	Colon and rectum cancer	1	Number	1992	62423.65144732038	76382.13359134494	51788.7667951473
2	DALYs (Disability-Adjusted Life Years)	68	Republic of Korea	2	Female	22	All ages	441	Colon and rectum cancer	1	Number	1992	56087.866766536645	65657.07630140061	46574.674138362476
2	DALYs (Disability-Adjusted Life Years)	68	Republic of Korea	3	Both	22	All ages	441	Colon and rectum cancer	1	Number	1992	118511.51821385704	133729.16758823465	103849.04694771155
2	DALYs (Disability-Adjusted Life Years)	68	Republic of Korea	1	Male	22	All ages	441	Colon and rectum cancer	3	Rate	1992	276.9036310698271	338.8217390351321	229.7285923157955
2	DALYs (Disability-Adjusted Life Years)	68	Republic of Korea	2	Female	22	All ages	441	Colon and rectum cancer	3	Rate	1992	251.23324921130222	294.0964162815462	208.62099754023035
2	DALYs (Disability-Adjusted Life Years)	68	Republic of Korea	3	Both	22	All ages	441	Colon and rectum cancer	3	Rate	1992	264.1309275599811	298.04705575676707	231.45214498915962
2	DALYs (Disability-Adjusted Life Years)	68	Republic of Korea	1	Male	27	Age-standardized	441	Colon and rectum cancer	3	Rate	1992	426.13367387324996	510.2387785266834	360.7648230013684
2	DALYs (Disability-Adjusted Life Years)	68	Republic of Korea	2	Female	27	Age-standardized	441	Colon and rectum cancer	3	Rate	1992	291.27385684011665	343.16546678610104	240.65884350806618
2	DALYs (Disability-Adjusted Life Years)	68	Republic of Korea	3	Both	27	Age-standardized	441	Colon and rectum cancer	3	Rate	1992	343.16227094213644	384.0836758244032	299.66702323294777
2	DALYs (Disability-Adjusted Life Years)	68	Republic of Korea	1	Male	22	All ages	441	Colon and rectum cancer	1	Number	1996	75621.32757070487	90374.79217544131	64256.115381513504
2	DALYs (Disability-Adjusted Life Years)	68	Republic of Korea	2	Female	22	All ages	441	Colon and rectum cancer	1	Number	1996	60845.59194650841	69321.84681282294	51995.9313596344
2	DALYs (Disability-Adjusted Life Years)	68	Republic of Korea	3	Both	22	All ages	441	Colon and rectum cancer	1	Number	1996	136466.91951721333	151614.87668298875	121386.8696043672
2	DALYs (Disability-Adjusted Life Years)	68	Republic of Korea	1	Male	22	All ages	441	Colon and rectum cancer	3	Rate	1996	329.08178248395774	393.2845224504204	279.6237207747056
2	DALYs (Disability-Adjusted Life Years)	68	Republic of Korea	2	Female	22	All ages	441	Colon and rectum cancer	3	Rate	1996	267.4532977539304	304.711581288942	228.55366949419985
2	DALYs (Disability-Adjusted Life Years)	68	Republic of Korea	3	Both	22	All ages	441	Colon and rectum cancer	3	Rate	1996	298.42219000294773	331.5473354042945	265.44554235628016
2	DALYs (Disability-Adjusted Life Years)	68	Republic of Korea	1	Male	27	Age-standardized	441	Colon and rectum cancer	3	Rate	1996	448.099321154523	529.663619035018	383.30439976489504
2	DALYs (Disability-Adjusted Life Years)	68	Republic of Korea	2	Female	27	Age-standardized	441	Colon and rectum cancer	3	Rate	1996	281.90640529829534	322.5212273025231	239.22361993405522
2	DALYs (Disability-Adjusted Life Years)	68	Republic of Korea	3	Both	27	Age-standardized	441	Colon and rectum cancer	3	Rate	1996	349.90489777137	386.6043430866557	311.3391522484184
2	DALYs (Disability-Adjusted Life Years)	68	Republic of Korea	1	Male	22	All ages	441	Colon and rectum cancer	1	Number	1997	77597.57666210289	92611.9234131637	65749.69966032801
2	DALYs (Disability-Adjusted Life Years)	68	Republic of Korea	2	Female	22	All ages	441	Colon and rectum cancer	1	Number	1997	62227.93246129717	70553.76474903154	53270.22845285968
2	DALYs (Disability-Adjusted Life Years)	68	Republic of Korea	3	Both	22	All ages	441	Colon and rectum cancer	1	Number	1997	139825.50912340003	155481.13577241293	124714.67264519699
2	DALYs (Disability-Adjusted Life Years)	68	Republic of Korea	1	Male	22	All ages	441	Colon and rectum cancer	3	Rate	1997	335.8111147124394	400.78717113116005	284.53826633127335
2	DALYs (Disability-Adjusted Life Years)	68	Republic of Korea	2	Female	22	All ages	441	Colon and rectum cancer	3	Rate	1997	272.00774202064514	308.4012192173645	232.85225758381614
2	DALYs (Disability-Adjusted Life Years)	68	Republic of Korea	3	Both	22	All ages	441	Colon and rectum cancer	3	Rate	1997	304.0691573419876	338.1143986764914	271.2086346557812
2	DALYs (Disability-Adjusted Life Years)	68	Republic of Korea	1	Male	27	Age-standardized	441	Colon and rectum cancer	3	Rate	1997	446.6411731064961	528.8240603238941	382.9369328293183
2	DALYs (Disability-Adjusted Life Years)	68	Republic of Korea	2	Female	27	Age-standardized	441	Colon and rectum cancer	3	Rate	1997	279.40472491740735	317.59562239637773	238.1217813202096
2	DALYs (Disability-Adjusted Life Years)	68	Republic of Korea	3	Both	27	Age-standardized	441	Colon and rectum cancer	3	Rate	1997	347.8212406489224	384.90923266351393	310.60053590227596
2	DALYs (Disability-Adjusted Life Years)	68	Republic of Korea	1	Male	22	All ages	441	Colon and rectum cancer	1	Number	1991	60469.582954974954	75518.3488381095	49707.581939460775
2	DALYs (Disability-Adjusted Life Years)	68	Republic of Korea	2	Female	22	All ages	441	Colon and rectum cancer	1	Number	1991	54398.50649912977	63783.55253023445	44754.99267002393
2	DALYs (Disability-Adjusted Life Years)	68	Republic of Korea	3	Both	22	All ages	441	Colon and rectum cancer	1	Number	1991	114868.08945410461	130138.79601860914	100502.67164935905
2	DALYs (Disability-Adjusted Life Years)	68	Republic of Korea	1	Male	22	All ages	441	Colon and rectum cancer	3	Rate	1991	269.91716309382235	337.0901118185265	221.87898188983846
2	DALYs (Disability-Adjusted Life Years)	68	Republic of Korea	2	Female	22	All ages	441	Colon and rectum cancer	3	Rate	1991	245.1156715763338	287.4039991194039	201.66270713484212
2	DALYs (Disability-Adjusted Life Years)	68	Republic of Korea	3	Both	22	All ages	441	Colon and rectum cancer	3	Rate	1991	257.574817580262	291.81713393083993	225.36247829520747
2	DALYs (Disability-Adjusted Life Years)	68	Republic of Korea	1	Male	27	Age-standardized	441	Colon and rectum cancer	3	Rate	1991	426.64028158338294	516.2778328575566	358.58825562081637
2	DALYs (Disability-Adjusted Life Years)	68	Republic of Korea	2	Female	27	Age-standardized	441	Colon and rectum cancer	3	Rate	1991	290.82515195068	341.70552159795085	237.8002783092044
2	DALYs (Disability-Adjusted Life Years)	68	Republic of Korea	3	Both	27	Age-standardized	441	Colon and rectum cancer	3	Rate	1991	343.1301585742827	385.4001190702504	298.47446631424145
2	DALYs (Disability-Adjusted Life Years)	68	Republic of Korea	1	Male	22	All ages	441	Colon and rectum cancer	1	Number	1999	82628.79779910718	98753.42904798666	70480.0372427309
2	DALYs (Disability-Adjusted Life Years)	68	Republic of Korea	2	Female	22	All ages	441	Colon and rectum cancer	1	Number	1999	65388.16672636588	75078.86301268218	56889.051420444324
2	DALYs (Disability-Adjusted Life Years)	68	Republic of Korea	3	Both	22	All ages	441	Colon and rectum cancer	1	Number	1999	148016.96452547284	166239.4213898135	132008.33748098236
2	DALYs (Disability-Adjusted Life Years)	68	Republic of Korea	1	Male	22	All ages	441	Colon and rectum cancer	3	Rate	1999	353.5442026831848	422.5367337412498	301.56324714592085
2	DALYs (Disability-Adjusted Life Years)	68	Republic of Korea	2	Female	22	All ages	441	Colon and rectum cancer	3	Rate	1999	282.43066098988515	324.2876191311043	245.72049042147302
2	DALYs (Disability-Adjusted Life Years)	68	Republic of Korea	3	Both	22	All ages	441	Colon and rectum cancer	3	Rate	1999	318.1552853645981	357.32357247482696	283.7455180655338
2	DALYs (Disability-Adjusted Life Years)	68	Republic of Korea	1	Male	27	Age-standardized	441	Colon and rectum cancer	3	Rate	1999	450.9161446626564	532.3815494759647	389.88147302920714
2	DALYs (Disability-Adjusted Life Years)	68	Republic of Korea	2	Female	27	Age-standardized	441	Colon and rectum cancer	3	Rate	1999	277.8130322498201	320.2433878747168	240.5723395222514
2	DALYs (Disability-Adjusted Life Years)	68	Republic of Korea	3	Both	27	Age-standardized	441	Colon and rectum cancer	3	Rate	1999	349.0656253870454	392.5791699134727	311.799741947858
2	DALYs (Disability-Adjusted Life Years)	68	Republic of Korea	1	Male	22	All ages	441	Colon and rectum cancer	1	Number	1994	70160.14670525443	84323.3172438305	59075.69082911447
2	DALYs (Disability-Adjusted Life Years)	68	Republic of Korea	2	Female	22	All ages	441	Colon and rectum cancer	1	Number	1994	58898.36131151559	67409.6827009925	49592.120018647125
2	DALYs (Disability-Adjusted Life Years)	68	Republic of Korea	3	Both	22	All ages	441	Colon and rectum cancer	1	Number	1994	129058.50801677012	144240.6384293756	113810.51756544123
2	DALYs (Disability-Adjusted Life Years)	68	Republic of Korea	1	Male	22	All ages	441	Colon and rectum cancer	3	Rate	1994	308.27139791254245	370.5018889510335	259.5682399446348
2	DALYs (Disability-Adjusted Life Years)	68	Republic of Korea	2	Female	22	All ages	441	Colon and rectum cancer	3	Rate	1994	261.3723132800665	299.1428676911062	220.0741555640224
2	DALYs (Disability-Adjusted Life Years)	68	Republic of Korea	3	Both	22	All ages	441	Colon and rectum cancer	3	Rate	1994	284.93831083257356	318.4577638394648	251.27345053348876
2	DALYs (Disability-Adjusted Life Years)	68	Republic of Korea	1	Male	27	Age-standardized	441	Colon and rectum cancer	3	Rate	1994	448.86302145768894	532.9137676140723	384.72584461125615
2	DALYs (Disability-Adjusted Life Years)	68	Republic of Korea	2	Female	27	Age-standardized	441	Colon and rectum cancer	3	Rate	1994	289.03454498336396	331.6507469674267	242.11793503726048
2	DALYs (Disability-Adjusted Life Years)	68	Republic of Korea	3	Both	27	Age-standardized	441	Colon and rectum cancer	3	Rate	1994	351.89138284805233	391.85554612860506	309.8678248884708
2	DALYs (Disability-Adjusted Life Years)	68	Republic of Korea	1	Male	22	All ages	441	Colon and rectum cancer	1	Number	1995	72642.21534687148	86472.51271920138	61382.06329178266
2	DALYs (Disability-Adjusted Life Years)	68	Republic of Korea	2	Female	22	All ages	441	Colon and rectum cancer	1	Number	1995	59847.40751064585	68488.3	50503.67552457153
2	DALYs (Disability-Adjusted Life Years)	68	Republic of Korea	3	Both	22	All ages	441	Colon and rectum cancer	1	Number	1995	132489.6228575175	147142.60978659036	117784.40283158427
2	DALYs (Disability-Adjusted Life Years)	68	Republic of Korea	1	Male	22	All ages	441	Colon and rectum cancer	3	Rate	1995	317.77277355131235	378.2732956521151	268.5153310012868
2	DALYs (Disability-Adjusted Life Years)	68	Republic of Korea	2	Female	22	All ages	441	Colon and rectum cancer	3	Rate	1995	264.4197117812196	302.59698834103745	223.1369391184396
2	DALYs (Disability-Adjusted Life Years)	68	Republic of Korea	3	Both	22	All ages	441	Colon and rectum cancer	3	Rate	1995	291.2289465903391	323.4380649780122	258.9050132500106
2	DALYs (Disability-Adjusted Life Years)	68	Republic of Korea	1	Male	27	Age-standardized	441	Colon and rectum cancer	3	Rate	1995	446.81970035719553	523.2393098737789	382.18064223357163
2	DALYs (Disability-Adjusted Life Years)	68	Republic of Korea	2	Female	27	Age-standardized	441	Colon and rectum cancer	3	Rate	1995	285.6492981065953	328.20049423467924	240.88741158474002
2	DALYs (Disability-Adjusted Life Years)	68	Republic of Korea	3	Both	27	Age-standardized	441	Colon and rectum cancer	3	Rate	1995	350.465405077992	388.82621715550596	311.8088635037026
2	DALYs (Disability-Adjusted Life Years)	68	Republic of Korea	1	Male	22	All ages	441	Colon and rectum cancer	1	Number	1998	79829.40216887652	95578.04942660543	67983.73891119349
2	DALYs (Disability-Adjusted Life Years)	68	Republic of Korea	2	Female	22	All ages	441	Colon and rectum cancer	1	Number	1998	63383.93856317156	71672.30944952216	54719.919677248705
2	DALYs (Disability-Adjusted Life Years)	68	Republic of Korea	3	Both	22	All ages	441	Colon and rectum cancer	1	Number	1998	143213.34073204792	159170.48691289153	127564.50765320868
2	DALYs (Disability-Adjusted Life Years)	68	Republic of Korea	1	Male	22	All ages	441	Colon and rectum cancer	3	Rate	1998	343.50132285846183	411.26684557673525	292.5301156515966
2	DALYs (Disability-Adjusted Life Years)	68	Republic of Korea	2	Female	22	All ages	441	Colon and rectum cancer	3	Rate	1998	275.4372942063472	311.4547223129927	237.78747355796816
2	DALYs (Disability-Adjusted Life Years)	68	Republic of Korea	3	Both	22	All ages	441	Colon and rectum cancer	3	Rate	1998	309.6369220475178	344.1373505889008	275.80308727067967
2	DALYs (Disability-Adjusted Life Years)	68	Republic of Korea	1	Male	27	Age-standardized	441	Colon and rectum cancer	3	Rate	1998	447.372999741348	527.8583616599338	386.09225432172025
2	DALYs (Disability-Adjusted Life Years)	68	Republic of Korea	2	Female	27	Age-standardized	441	Colon and rectum cancer	3	Rate	1998	276.8663983255436	314.8450964147145	238.54266035859558
2	DALYs (Disability-Adjusted Life Years)	68	Republic of Korea	3	Both	27	Age-standardized	441	Colon and rectum cancer	3	Rate	1998	346.8997575072351	386.6761036560519	309.46683867977805
2	DALYs (Disability-Adjusted Life Years)	67	Japan	1	Male	22	All ages	441	Colon and rectum cancer	1	Number	1995	491337.0121810819	506493.2556759552	475458.0314362611
2	DALYs (Disability-Adjusted Life Years)	67	Japan	2	Female	22	All ages	441	Colon and rectum cancer	1	Number	1995	362959.5409644443	381598.34219614463	334101.8354808068
2	DALYs (Disability-Adjusted Life Years)	67	Japan	3	Both	22	All ages	441	Colon and rectum cancer	1	Number	1995	854296.5531455261	887233.4686898588	812009.6816896165
2	DALYs (Disability-Adjusted Life Years)	67	Japan	1	Male	22	All ages	441	Colon and rectum cancer	3	Rate	1995	784.1469235567495	808.3354569147905	758.8049411870624
2	DALYs (Disability-Adjusted Life Years)	67	Japan	2	Female	22	All ages	441	Colon and rectum cancer	3	Rate	1995	558.6410911178508	587.3285867806962	514.2253966420965
2	DALYs (Disability-Adjusted Life Years)	67	Japan	3	Both	22	All ages	441	Colon and rectum cancer	3	Rate	1995	669.3505679949587	695.1569967420095	636.2183478970026
2	DALYs (Disability-Adjusted Life Years)	67	Japan	1	Male	27	Age-standardized	441	Colon and rectum cancer	3	Rate	1995	568.0770375501916	585.6190986994336	548.12964332682
2	DALYs (Disability-Adjusted Life Years)	67	Japan	2	Female	27	Age-standardized	441	Colon and rectum cancer	3	Rate	1995	340.62291771529317	356.819055621827	316.85449160758236
2	DALYs (Disability-Adjusted Life Years)	67	Japan	3	Both	27	Age-standardized	441	Colon and rectum cancer	3	Rate	1995	441.58198265527363	458.333971934532	419.83111844469914
2	DALYs (Disability-Adjusted Life Years)	68	Republic of Korea	1	Male	22	All ages	441	Colon and rectum cancer	1	Number	1993	65604.17374452602	79230.32380018596	55032.06024697989
2	DALYs (Disability-Adjusted Life Years)	68	Republic of Korea	2	Female	22	All ages	441	Colon and rectum cancer	1	Number	1993	57516.149004771025	67028.7714353363	47956.68729545199
2	DALYs (Disability-Adjusted Life Years)	68	Republic of Korea	3	Both	22	All ages	441	Colon and rectum cancer	1	Number	1993	123120.32274929724	138311.88989435678	108496.80465510621
2	DALYs (Disability-Adjusted Life Years)	68	Republic of Korea	1	Male	22	All ages	441	Colon and rectum cancer	3	Rate	1993	289.52183164484603	349.6562361683294	242.86538450954262
2	DALYs (Disability-Adjusted Life Years)	68	Republic of Korea	2	Female	22	All ages	441	Colon and rectum cancer	3	Rate	1993	256.3631396986664	298.763157698226	213.75434790652218
2	DALYs (Disability-Adjusted Life Years)	68	Republic of Korea	3	Both	22	All ages	441	Colon and rectum cancer	3	Rate	1993	273.02486615168544	306.71285115526587	240.59655552693945
2	DALYs (Disability-Adjusted Life Years)	68	Republic of Korea	1	Male	27	Age-standardized	441	Colon and rectum cancer	3	Rate	1993	433.86235854943845	515.0655923559091	370.03520025201203
2	DALYs (Disability-Adjusted Life Years)	68	Republic of Korea	2	Female	27	Age-standardized	441	Colon and rectum cancer	3	Rate	1993	290.46658981240586	340.14494242675283	241.68665382274628
2	DALYs (Disability-Adjusted Life Years)	68	Republic of Korea	3	Both	27	Age-standardized	441	Colon and rectum cancer	3	Rate	1993	346.0983670172253	387.27609358725687	304.0824789730989
2	DALYs (Disability-Adjusted Life Years)	68	Republic of Korea	1	Male	22	All ages	441	Colon and rectum cancer	1	Number	2000	85428.51383637673	101606.80221918788	72471.50945622695
2	DALYs (Disability-Adjusted Life Years)	68	Republic of Korea	2	Female	22	All ages	441	Colon and rectum cancer	1	Number	2000	67139.64235125316	77962.55704092543	58157.82488186612
2	DALYs (Disability-Adjusted Life Years)	68	Republic of Korea	3	Both	22	All ages	441	Colon and rectum cancer	1	Number	2000	152568.15618762982	172614.73605423022	136226.42879332925
2	DALYs (Disability-Adjusted Life Years)	68	Republic of Korea	1	Male	22	All ages	441	Colon and rectum cancer	3	Rate	2000	363.59527345505467	432.45225017654633	308.4485157836975
2	DALYs (Disability-Adjusted Life Years)	68	Republic of Korea	2	Female	22	All ages	441	Colon and rectum cancer	3	Rate	2000	288.26900690072995	334.73798945861734	249.7049110642039
2	DALYs (Disability-Adjusted Life Years)	68	Republic of Korea	3	Both	22	All ages	441	Colon and rectum cancer	3	Rate	2000	326.09706596758434	368.9443483922589	291.1684839535901
2	DALYs (Disability-Adjusted Life Years)	68	Republic of Korea	1	Male	27	Age-standardized	441	Colon and rectum cancer	3	Rate	2000	451.9229522218523	531.6698917690213	389.8099460568676
2	DALYs (Disability-Adjusted Life Years)	68	Republic of Korea	2	Female	27	Age-standardized	441	Colon and rectum cancer	3	Rate	2000	276.83391605267155	322.9757441122732	238.53854733707536
2	DALYs (Disability-Adjusted Life Years)	68	Republic of Korea	3	Both	27	Age-standardized	441	Colon and rectum cancer	3	Rate	2000	349.2730219816411	394.8913757754524	311.44379584166984
2	DALYs (Disability-Adjusted Life Years)	68	Republic of Korea	1	Male	22	All ages	441	Colon and rectum cancer	1	Number	2001	87178.59548686685	103514.34752065105	74476.94269117579
2	DALYs (Disability-Adjusted Life Years)	68	Republic of Korea	2	Female	22	All ages	441	Colon and rectum cancer	1	Number	2001	67865.27395053847	79168.45166428329	57788.86372477982
2	DALYs (Disability-Adjusted Life Years)	68	Republic of Korea	3	Both	22	All ages	441	Colon and rectum cancer	1	Number	2001	155043.8694374053	175475.30752833915	137985.835562389
2	DALYs (Disability-Adjusted Life Years)	68	Republic of Korea	1	Male	22	All ages	441	Colon and rectum cancer	3	Rate	2001	369.4110414111518	438.6322434428328	315.5889907036943
2	DALYs (Disability-Adjusted Life Years)	68	Republic of Korea	2	Female	22	All ages	441	Colon and rectum cancer	3	Rate	2001	289.7513605567167	338.01037331129373	246.73004195761848
2	DALYs (Disability-Adjusted Life Years)	68	Republic of Korea	3	Both	22	All ages	441	Colon and rectum cancer	3	Rate	2001	329.7315097664031	373.183011285734	293.4542207406259
2	DALYs (Disability-Adjusted Life Years)	68	Republic of Korea	1	Male	27	Age-standardized	441	Colon and rectum cancer	3	Rate	2001	445.3273130660935	520.6555407564744	383.28548138266075
2	DALYs (Disability-Adjusted Life Years)	68	Republic of Korea	2	Female	27	Age-standardized	441	Colon and rectum cancer	3	Rate	2001	271.0977836661716	317.5396266453505	230.27703816482955
2	DALYs (Disability-Adjusted Life Years)	68	Republic of Korea	3	Both	27	Age-standardized	441	Colon and rectum cancer	3	Rate	2001	343.70219072484014	386.7661900988003	304.75289578834276
2	DALYs (Disability-Adjusted Life Years)	68	Republic of Korea	1	Male	22	All ages	441	Colon and rectum cancer	1	Number	2002	90233.07807407336	106665.89758425191	76834.06973068301
2	DALYs (Disability-Adjusted Life Years)	68	Republic of Korea	2	Female	22	All ages	441	Colon and rectum cancer	1	Number	2002	69766.52200908482	80310.8384801122	59399.93865049933
2	DALYs (Disability-Adjusted Life Years)	68	Republic of Korea	3	Both	22	All ages	441	Colon and rectum cancer	1	Number	2002	159999.60008315826	180416.8270388799	142437.51344267296
2	DALYs (Disability-Adjusted Life Years)	68	Republic of Korea	1	Male	22	All ages	441	Colon and rectum cancer	3	Rate	2002	381.026240729973	450.4169295571625	324.44639343272695
2	DALYs (Disability-Adjusted Life Years)	68	Republic of Korea	2	Female	22	All ages	441	Colon and rectum cancer	3	Rate	2002	296.2972911851433	341.0788327869661	252.27057923877632
2	DALYs (Disability-Adjusted Life Years)	68	Republic of Korea	3	Both	22	All ages	441	Colon and rectum cancer	3	Rate	2002	338.78328553750873	382.01473877882523	301.59730876090634
2	DALYs (Disability-Adjusted Life Years)	68	Republic of Korea	1	Male	27	Age-standardized	441	Colon and rectum cancer	3	Rate	2002	444.2543261686325	517.5252204302536	383.192761926596
2	DALYs (Disability-Adjusted Life Years)	68	Republic of Korea	2	Female	27	Age-standardized	441	Colon and rectum cancer	3	Rate	2002	268.90914228598285	310.4874108666258	228.65895166675884
2	DALYs (Disability-Adjusted Life Years)	68	Republic of Korea	3	Both	27	Age-standardized	441	Colon and rectum cancer	3	Rate	2002	342.09599964383176	380.75383648292933	303.6791778269743
2	DALYs (Disability-Adjusted Life Years)	68	Republic of Korea	1	Male	22	All ages	441	Colon and rectum cancer	1	Number	2003	94304.1269120374	110848.08214998883	81362.07161875622
2	DALYs (Disability-Adjusted Life Years)	68	Republic of Korea	2	Female	22	All ages	441	Colon and rectum cancer	1	Number	2003	72024.31742792847	83273.16696174008	61108.78801990005
2	DALYs (Disability-Adjusted Life Years)	68	Republic of Korea	3	Both	22	All ages	441	Colon and rectum cancer	1	Number	2003	166328.44433996596	187541.78942115788	149246.88727911998
2	DALYs (Disability-Adjusted Life Years)	68	Republic of Korea	1	Male	22	All ages	441	Colon and rectum cancer	3	Rate	2003	397.0853730417642	466.7468274484818	342.59039999723126
2	DALYs (Disability-Adjusted Life Years)	68	Republic of Korea	2	Female	22	All ages	441	Colon and rectum cancer	3	Rate	2003	304.30355978204375	351.8300769200476	258.18532396408636
2	DALYs (Disability-Adjusted Life Years)	68	Republic of Korea	3	Both	22	All ages	441	Colon and rectum cancer	3	Rate	2003	350.7732288260283	395.5104568922108	314.7496073258944
2	DALYs (Disability-Adjusted Life Years)	68	Republic of Korea	1	Male	27	Age-standardized	441	Colon and rectum cancer	3	Rate	2003	446.8885313722317	518.1955810293239	388.9639024139453
2	DALYs (Disability-Adjusted Life Years)	68	Republic of Korea	2	Female	27	Age-standardized	441	Colon and rectum cancer	3	Rate	2003	267.7988930114769	309.7750986189352	225.7980897927143
2	DALYs (Disability-Adjusted Life Years)	68	Republic of Korea	3	Both	27	Age-standardized	441	Colon and rectum cancer	3	Rate	2003	342.9058496460828	383.01979707081375	307.1597104540843
2	DALYs (Disability-Adjusted Life Years)	68	Republic of Korea	1	Male	22	All ages	441	Colon and rectum cancer	1	Number	1990	57027.87181220898	71438.51440267698	46645.92855370134
2	DALYs (Disability-Adjusted Life Years)	68	Republic of Korea	2	Female	22	All ages	441	Colon and rectum cancer	1	Number	1990	52008.36521508049	61772.846583117	42903.251594033754
2	DALYs (Disability-Adjusted Life Years)	68	Republic of Korea	3	Both	22	All ages	441	Colon and rectum cancer	1	Number	1990	109036.23702728935	124319.54602178335	94901.79822231829
2	DALYs (Disability-Adjusted Life Years)	68	Republic of Korea	1	Male	22	All ages	441	Colon and rectum cancer	3	Rate	1990	256.6549539216378	321.5103078478201	209.93083317233643
2	DALYs (Disability-Adjusted Life Years)	68	Republic of Korea	2	Female	22	All ages	441	Colon and rectum cancer	3	Rate	1990	236.1265344656042	280.458886323876	194.78782065750497
2	DALYs (Disability-Adjusted Life Years)	68	Republic of Korea	3	Both	22	All ages	441	Colon and rectum cancer	3	Rate	1990	246.43575649643097	280.977977656211	214.49012801070307
2	DALYs (Disability-Adjusted Life Years)	68	Republic of Korea	1	Male	27	Age-standardized	441	Colon and rectum cancer	3	Rate	1990	415.6870556691007	512.3480652629759	346.91702680891825
2	DALYs (Disability-Adjusted Life Years)	68	Republic of Korea	2	Female	27	Age-standardized	441	Colon and rectum cancer	3	Rate	1990	286.4138462364626	341.7052952801051	234.0407931885356
2	DALYs (Disability-Adjusted Life Years)	68	Republic of Korea	3	Both	27	Age-standardized	441	Colon and rectum cancer	3	Rate	1990	336.06532526730336	382.585906514313	291.306450337123
2	DALYs (Disability-Adjusted Life Years)	6	China	1	Male	22	All ages	441	Colon and rectum cancer	1	Number	1991	2090153.4410342388	2551098.7579631745	1670302.8570896029
2	DALYs (Disability-Adjusted Life Years)	6	China	2	Female	22	All ages	441	Colon and rectum cancer	1	Number	1991	1546610.2619062485	1859136.0698133456	1275261.5110936798
2	DALYs (Disability-Adjusted Life Years)	6	China	3	Both	22	All ages	441	Colon and rectum cancer	1	Number	1991	3636763.7029404873	4152244.068774568	3191310.2194821653
2	DALYs (Disability-Adjusted Life Years)	6	China	1	Male	22	All ages	441	Colon and rectum cancer	3	Rate	1991	339.4008731556195	414.2495612812446	271.2251823244254
2	DALYs (Disability-Adjusted Life Years)	6	China	2	Female	22	All ages	441	Colon and rectum cancer	3	Rate	1991	268.05541887529665	322.2217711951261	221.02579230945366
2	DALYs (Disability-Adjusted Life Years)	6	China	3	Both	22	All ages	441	Colon and rectum cancer	3	Rate	1991	304.89037456144484	348.10599555192823	267.545501340373
2	DALYs (Disability-Adjusted Life Years)	6	China	1	Male	27	Age-standardized	441	Colon and rectum cancer	3	Rate	1991	452.7544850100508	547.7627356416527	365.3305557659952
2	DALYs (Disability-Adjusted Life Years)	6	China	2	Female	27	Age-standardized	441	Colon and rectum cancer	3	Rate	1991	329.9990733203366	395.8173840435771	273.84008660964975
2	DALYs (Disability-Adjusted Life Years)	6	China	3	Both	27	Age-standardized	441	Colon and rectum cancer	3	Rate	1991	387.87442349769424	442.7822298547406	340.1194078386751
2	DALYs (Disability-Adjusted Life Years)	71	Australia	1	Male	22	All ages	441	Colon and rectum cancer	1	Number	1991	58948.39696625525	63797.99593042761	54371.32377402435
2	DALYs (Disability-Adjusted Life Years)	71	Australia	2	Female	22	All ages	441	Colon and rectum cancer	1	Number	1991	49262.37213201555	54005.18405784285	44421.91020802695
2	DALYs (Disability-Adjusted Life Years)	71	Australia	3	Both	22	All ages	441	Colon and rectum cancer	1	Number	1991	108210.76909827082	117433.20504779647	99307.5505175074
2	DALYs (Disability-Adjusted Life Years)	71	Australia	1	Male	22	All ages	441	Colon and rectum cancer	3	Rate	1991	694.2692743131742	751.3857987115096	640.3624431322094
2	DALYs (Disability-Adjusted Life Years)	71	Australia	2	Female	22	All ages	441	Colon and rectum cancer	3	Rate	1991	572.9924588512424	628.1582040160522	516.690903327904
2	DALYs (Disability-Adjusted Life Years)	71	Australia	3	Both	22	All ages	441	Colon and rectum cancer	3	Rate	1991	633.2523227127157	687.222265212641	581.1504488154205
2	DALYs (Disability-Adjusted Life Years)	71	Australia	1	Male	27	Age-standardized	441	Colon and rectum cancer	3	Rate	1991	649.4433313402974	702.7784526438494	599.3583775358769
2	DALYs (Disability-Adjusted Life Years)	71	Australia	2	Female	27	Age-standardized	441	Colon and rectum cancer	3	Rate	1991	460.9052590832836	504.7007501637495	418.15459483476036
2	DALYs (Disability-Adjusted Life Years)	71	Australia	3	Both	27	Age-standardized	441	Colon and rectum cancer	3	Rate	1991	547.8605426067155	594.9315712680655	503.62970874496824
2	DALYs (Disability-Adjusted Life Years)	6	China	1	Male	22	All ages	441	Colon and rectum cancer	1	Number	1992	2129147.7360277167	2550849.389151262	1726548.4753751648
2	DALYs (Disability-Adjusted Life Years)	6	China	2	Female	22	All ages	441	Colon and rectum cancer	1	Number	1992	1564330.198070472	1858074.4343804915	1303500.194005455
2	DALYs (Disability-Adjusted Life Years)	6	China	3	Both	22	All ages	441	Colon and rectum cancer	1	Number	1992	3693477.9340981855	4186718.92172452	3206703.503354811
2	DALYs (Disability-Adjusted Life Years)	6	China	1	Male	22	All ages	441	Colon and rectum cancer	3	Rate	1992	341.6336543296632	409.2980415188019	277.03435277825554
2	DALYs (Disability-Adjusted Life Years)	6	China	2	Female	22	All ages	441	Colon and rectum cancer	3	Rate	1992	268.3176707913791	318.70138734451797	223.57948236443838
2	DALYs (Disability-Adjusted Life Years)	6	China	3	Both	22	All ages	441	Colon and rectum cancer	3	Rate	1992	306.1976926160214	347.0884885026112	265.84298895255137
2	DALYs (Disability-Adjusted Life Years)	6	China	1	Male	27	Age-standardized	441	Colon and rectum cancer	3	Rate	1992	449.9311700276986	536.9126717814838	371.3868146005576
2	DALYs (Disability-Adjusted Life Years)	6	China	2	Female	27	Age-standardized	441	Colon and rectum cancer	3	Rate	1992	325.82399982654727	385.78077305931356	273.2937502778022
2	DALYs (Disability-Adjusted Life Years)	6	China	3	Both	27	Age-standardized	441	Colon and rectum cancer	3	Rate	1992	384.4328301815447	434.8418810234055	333.7588326059545
2	DALYs (Disability-Adjusted Life Years)	68	Republic of Korea	1	Male	22	All ages	441	Colon and rectum cancer	1	Number	2004	98591.84886043427	114676.77538626693	85752.16447855861
2	DALYs (Disability-Adjusted Life Years)	68	Republic of Korea	2	Female	22	All ages	441	Colon and rectum cancer	1	Number	2004	73678.8672147864	84412.56065865191	63547.34600849188
2	DALYs (Disability-Adjusted Life Years)	68	Republic of Korea	3	Both	22	All ages	441	Colon and rectum cancer	1	Number	2004	172270.71607522073	192107.90628758262	155080.4646380315
2	DALYs (Disability-Adjusted Life Years)	68	Republic of Korea	1	Male	22	All ages	441	Colon and rectum cancer	3	Rate	2004	414.06934932473837	481.6233625364792	360.1448127734024
2	DALYs (Disability-Adjusted Life Years)	68	Republic of Korea	2	Female	22	All ages	441	Colon and rectum cancer	3	Rate	2004	309.6773620615176	354.79181613127616	267.0938794505645
2	DALYs (Disability-Adjusted Life Years)	68	Republic of Korea	3	Both	22	All ages	441	Colon and rectum cancer	3	Rate	2004	361.8934534910443	403.56594105634656	325.78145720568926
2	DALYs (Disability-Adjusted Life Years)	68	Republic of Korea	1	Male	27	Age-standardized	441	Colon and rectum cancer	3	Rate	2004	449.9008979582075	515.7520097473702	391.96641248225984
2	DALYs (Disability-Adjusted Life Years)	68	Republic of Korea	2	Female	27	Age-standardized	441	Colon and rectum cancer	3	Rate	2004	264.40505962813364	304.3516677968655	226.76514902856107
2	DALYs (Disability-Adjusted Life Years)	68	Republic of Korea	3	Both	27	Age-standardized	441	Colon and rectum cancer	3	Rate	2004	342.78270663950485	381.42877127721044	308.404440079876
2	DALYs (Disability-Adjusted Life Years)	68	Republic of Korea	1	Male	22	All ages	441	Colon and rectum cancer	1	Number	2005	101797.2645257585	116532.16422794203	88513.2277731872
2	DALYs (Disability-Adjusted Life Years)	68	Republic of Korea	2	Female	22	All ages	441	Colon and rectum cancer	1	Number	2005	75975.31597164148	86746.22149073146	66193.51077340348
2	DALYs (Disability-Adjusted Life Years)	68	Republic of Korea	3	Both	22	All ages	441	Colon and rectum cancer	1	Number	2005	177772.58049740008	197082.03017387743	160234.935743395
2	DALYs (Disability-Adjusted Life Years)	68	Republic of Korea	1	Male	22	All ages	441	Colon and rectum cancer	3	Rate	2005	426.3495791742765	488.06261553599046	370.7130794551582
2	DALYs (Disability-Adjusted Life Years)	68	Republic of Korea	2	Female	22	All ages	441	Colon and rectum cancer	3	Rate	2005	317.6058880508389	362.63239394624185	276.7141999150982
2	DALYs (Disability-Adjusted Life Years)	68	Republic of Korea	3	Both	22	All ages	441	Colon and rectum cancer	3	Rate	2005	371.9267976820212	412.3250512432863	335.2354247268011
2	DALYs (Disability-Adjusted Life Years)	68	Republic of Korea	1	Male	27	Age-standardized	441	Colon and rectum cancer	3	Rate	2005	448.80593408727657	509.35062522116283	389.74943643859183
2	DALYs (Disability-Adjusted Life Years)	68	Republic of Korea	2	Female	27	Age-standardized	441	Colon and rectum cancer	3	Rate	2005	263.2596334668069	301.1118679413386	228.66342617045512
2	DALYs (Disability-Adjusted Life Years)	68	Republic of Korea	3	Both	27	Age-standardized	441	Colon and rectum cancer	3	Rate	2005	341.80702340442275	378.36372805688075	307.13910309305066
2	DALYs (Disability-Adjusted Life Years)	68	Republic of Korea	1	Male	22	All ages	441	Colon and rectum cancer	1	Number	2006	105131.00053486374	119993.0818748567	90660.4663018062
2	DALYs (Disability-Adjusted Life Years)	68	Republic of Korea	2	Female	22	All ages	441	Colon and rectum cancer	1	Number	2006	77220.97828895893	88203.3911919018	66801.24143396979
2	DALYs (Disability-Adjusted Life Years)	68	Republic of Korea	3	Both	22	All ages	441	Colon and rectum cancer	1	Number	2006	182351.9788238225	201217.01672906126	163763.55009219755
2	DALYs (Disability-Adjusted Life Years)	68	Republic of Korea	1	Male	22	All ages	441	Colon and rectum cancer	3	Rate	2006	438.8319503964528	500.8684202121951	378.42985464482496
2	DALYs (Disability-Adjusted Life Years)	68	Republic of Korea	2	Female	22	All ages	441	Colon and rectum cancer	3	Rate	2006	320.9669865124009	366.6150999162751	277.6576214576949
2	DALYs (Disability-Adjusted Life Years)	68	Republic of Korea	3	Both	22	All ages	441	Colon and rectum cancer	3	Rate	2006	379.77446607837385	419.06364596126537	341.06136495206744
2	DALYs (Disability-Adjusted Life Years)	68	Republic of Korea	1	Male	27	Age-standardized	441	Colon and rectum cancer	3	Rate	2006	446.7805618530211	503.62261727158375	388.985639027365
2	DALYs (Disability-Adjusted Life Years)	68	Republic of Korea	2	Female	27	Age-standardized	441	Colon and rectum cancer	3	Rate	2006	258.1537432796907	294.6974618126115	223.12178320008724
2	DALYs (Disability-Adjusted Life Years)	68	Republic of Korea	3	Both	27	Age-standardized	441	Colon and rectum cancer	3	Rate	2006	338.3574099361564	373.6902895059825	303.77660433661396
2	DALYs (Disability-Adjusted Life Years)	67	Japan	1	Male	22	All ages	441	Colon and rectum cancer	1	Number	2000	537907.5121387283	556794.0064237923	516458.0022499366
2	DALYs (Disability-Adjusted Life Years)	67	Japan	2	Female	22	All ages	441	Colon and rectum cancer	1	Number	2000	390681.96754869184	415743.78877470765	350533.4237236924
2	DALYs (Disability-Adjusted Life Years)	67	Japan	3	Both	22	All ages	441	Colon and rectum cancer	1	Number	2000	928589.4796874204	972605.8195910637	867365.7995677962
2	DALYs (Disability-Adjusted Life Years)	67	Japan	1	Male	22	All ages	441	Colon and rectum cancer	3	Rate	2000	851.2747258127281	881.163870101041	817.3294373805243
2	DALYs (Disability-Adjusted Life Years)	67	Japan	2	Female	22	All ages	441	Colon and rectum cancer	3	Rate	2000	593.7418678276731	631.8297597241502	532.725815433994
2	DALYs (Disability-Adjusted Life Years)	67	Japan	3	Both	22	All ages	441	Colon and rectum cancer	3	Rate	2000	719.90129668328	754.025547350594	672.4368275395236
2	DALYs (Disability-Adjusted Life Years)	67	Japan	1	Male	27	Age-standardized	441	Colon and rectum cancer	3	Rate	2000	545.1370920580986	564.5948279216447	522.0240719313607
2	DALYs (Disability-Adjusted Life Years)	67	Japan	2	Female	27	Age-standardized	441	Colon and rectum cancer	3	Rate	2000	321.8434872417962	339.6124551346873	294.9004257610733
2	DALYs (Disability-Adjusted Life Years)	67	Japan	3	Both	27	Age-standardized	441	Colon and rectum cancer	3	Rate	2000	422.1189005403052	441.14129443612717	396.46267222774554
2	DALYs (Disability-Adjusted Life Years)	68	Republic of Korea	1	Male	22	All ages	441	Colon and rectum cancer	1	Number	2007	108897.55727584027	124234.1308323806	93541.10251182757
2	DALYs (Disability-Adjusted Life Years)	68	Republic of Korea	2	Female	22	All ages	441	Colon and rectum cancer	1	Number	2007	79313.74193312007	90305.65450787627	68395.97042597926
2	DALYs (Disability-Adjusted Life Years)	68	Republic of Korea	3	Both	22	All ages	441	Colon and rectum cancer	1	Number	2007	188211.2992089605	207759.30524977343	168623.91348479164
2	DALYs (Disability-Adjusted Life Years)	68	Republic of Korea	1	Male	22	All ages	441	Colon and rectum cancer	3	Rate	2007	452.58369406487014	516.3232607562937	388.76150008092003
2	DALYs (Disability-Adjusted Life Years)	68	Republic of Korea	2	Female	22	All ages	441	Colon and rectum cancer	3	Rate	2007	327.6267109286457	373.0317577201503	282.52792372766856
2	DALYs (Disability-Adjusted Life Years)	68	Republic of Korea	3	Both	22	All ages	441	Colon and rectum cancer	3	Rate	2007	389.91459287076225	430.41191077289574	349.3356926551995
2	DALYs (Disability-Adjusted Life Years)	68	Republic of Korea	1	Male	27	Age-standardized	441	Colon and rectum cancer	3	Rate	2007	443.5881415464093	499.26059770324815	384.62707572811865
2	DALYs (Disability-Adjusted Life Years)	68	Republic of Korea	2	Female	27	Age-standardized	441	Colon and rectum cancer	3	Rate	2007	254.78716359512967	289.3901875307814	219.63939009042332
2	DALYs (Disability-Adjusted Life Years)	68	Republic of Korea	3	Both	27	Age-standardized	441	Colon and rectum cancer	3	Rate	2007	335.2936670518524	369.49960058770847	299.8906655961156
2	DALYs (Disability-Adjusted Life Years)	68	Republic of Korea	1	Male	22	All ages	441	Colon and rectum cancer	1	Number	2008	113402.17470194367	129640.63119311289	97945.9060752512
2	DALYs (Disability-Adjusted Life Years)	68	Republic of Korea	2	Female	22	All ages	441	Colon and rectum cancer	1	Number	2008	81027.18867020369	92514.79693119912	69253.59070764689
2	DALYs (Disability-Adjusted Life Years)	68	Republic of Korea	3	Both	22	All ages	441	Colon and rectum cancer	1	Number	2008	194429.36337214743	215505.0216398131	174429.28352389502
2	DALYs (Disability-Adjusted Life Years)	68	Republic of Korea	1	Male	22	All ages	441	Colon and rectum cancer	3	Rate	2008	468.72660920146274	535.8452219597835	404.84102320332784
2	DALYs (Disability-Adjusted Life Years)	68	Republic of Korea	2	Female	22	All ages	441	Colon and rectum cancer	3	Rate	2008	332.48784036684526	379.62621606965723	284.1759314364849
2	DALYs (Disability-Adjusted Life Years)	68	Republic of Korea	3	Both	22	All ages	441	Colon and rectum cancer	3	Rate	2008	400.35993277983374	443.75795137635095	359.1766954088851
2	DALYs (Disability-Adjusted Life Years)	68	Republic of Korea	1	Male	27	Age-standardized	441	Colon and rectum cancer	3	Rate	2008	442.84344651905303	501.553414358196	384.60673303688634
2	DALYs (Disability-Adjusted Life Years)	68	Republic of Korea	2	Female	27	Age-standardized	441	Colon and rectum cancer	3	Rate	2008	250.67522913914067	285.36956230967087	214.08325901042272
2	DALYs (Disability-Adjusted Life Years)	68	Republic of Korea	3	Both	27	Age-standardized	441	Colon and rectum cancer	3	Rate	2008	332.9490836076717	368.78499830691385	297.90938507202344
2	DALYs (Disability-Adjusted Life Years)	68	Republic of Korea	1	Male	22	All ages	441	Colon and rectum cancer	1	Number	2009	117985.43377090381	134882.48637152044	101263.58097270745
2	DALYs (Disability-Adjusted Life Years)	68	Republic of Korea	2	Female	22	All ages	441	Colon and rectum cancer	1	Number	2009	82930.26896087851	95617.5940491487	70867.12376145096
2	DALYs (Disability-Adjusted Life Years)	68	Republic of Korea	3	Both	22	All ages	441	Colon and rectum cancer	1	Number	2009	200915.70273178234	221712.15987393598	179457.42945890973
2	DALYs (Disability-Adjusted Life Years)	68	Republic of Korea	1	Male	22	All ages	441	Colon and rectum cancer	3	Rate	2009	484.31089678525694	553.6705324325031	415.67042765471246
2	DALYs (Disability-Adjusted Life Years)	68	Republic of Korea	2	Female	22	All ages	441	Colon and rectum cancer	3	Rate	2009	337.8335587057095	389.5179947835485	288.69184817021335
2	DALYs (Disability-Adjusted Life Years)	68	Republic of Korea	3	Both	22	All ages	441	Colon and rectum cancer	3	Rate	2009	410.79345882865954	453.31402065956814	366.9197437411848
2	DALYs (Disability-Adjusted Life Years)	68	Republic of Korea	1	Male	27	Age-standardized	441	Colon and rectum cancer	3	Rate	2009	441.3254201776789	502.1895466984538	380.55409768763207
2	DALYs (Disability-Adjusted Life Years)	68	Republic of Korea	2	Female	27	Age-standardized	441	Colon and rectum cancer	3	Rate	2009	247.07430060705573	284.26226505944544	211.11931326304418
2	DALYs (Disability-Adjusted Life Years)	68	Republic of Korea	3	Both	27	Age-standardized	441	Colon and rectum cancer	3	Rate	2009	330.787828782745	365.71606519514074	295.91258667017945
2	DALYs (Disability-Adjusted Life Years)	68	Republic of Korea	1	Male	22	All ages	441	Colon and rectum cancer	1	Number	2010	122739.51061971583	142161.02847611776	104445.96493920257
2	DALYs (Disability-Adjusted Life Years)	68	Republic of Korea	2	Female	22	All ages	441	Colon and rectum cancer	1	Number	2010	84370.31310833586	97770.54381418217	71827.54728316452
2	DALYs (Disability-Adjusted Life Years)	68	Republic of Korea	3	Both	22	All ages	441	Colon and rectum cancer	1	Number	2010	207109.8237280517	229954.36769823259	182959.47354331572
2	DALYs (Disability-Adjusted Life Years)	68	Republic of Korea	1	Male	22	All ages	441	Colon and rectum cancer	3	Rate	2010	499.486242716573	578.5217621916591	425.040985832391
2	DALYs (Disability-Adjusted Life Years)	68	Republic of Korea	2	Female	22	All ages	441	Colon and rectum cancer	3	Rate	2010	340.9588090300291	395.11205954986855	290.27076082755747
2	DALYs (Disability-Adjusted Life Years)	68	Republic of Korea	3	Both	22	All ages	441	Colon and rectum cancer	3	Rate	2010	419.9463060275714	466.2670535443997	370.9778400861922
2	DALYs (Disability-Adjusted Life Years)	68	Republic of Korea	1	Male	27	Age-standardized	441	Colon and rectum cancer	3	Rate	2010	441.00653964382144	507.2423743217577	377.78918540626586
2	DALYs (Disability-Adjusted Life Years)	68	Republic of Korea	2	Female	27	Age-standardized	441	Colon and rectum cancer	3	Rate	2010	241.987089452229	280.79350605773317	206.66163060963942
2	DALYs (Disability-Adjusted Life Years)	68	Republic of Korea	3	Both	27	Age-standardized	441	Colon and rectum cancer	3	Rate	2010	328.172312315077	364.14849172256544	290.03082970723
2	DALYs (Disability-Adjusted Life Years)	68	Republic of Korea	1	Male	22	All ages	441	Colon and rectum cancer	1	Number	2011	125753.37037866442	147785.66666943184	106865.28598689419
2	DALYs (Disability-Adjusted Life Years)	68	Republic of Korea	2	Female	22	All ages	441	Colon and rectum cancer	1	Number	2011	85284.73684661955	99935.08078841041	72199.70585203334
2	DALYs (Disability-Adjusted Life Years)	68	Republic of Korea	3	Both	22	All ages	441	Colon and rectum cancer	1	Number	2011	211038.10722528383	236322.65652553877	185606.3078792162
2	DALYs (Disability-Adjusted Life Years)	68	Republic of Korea	1	Male	22	All ages	441	Colon and rectum cancer	3	Rate	2011	506.2641423670483	594.9628512162427	430.22355739694274
2	DALYs (Disability-Adjusted Life Years)	68	Republic of Korea	2	Female	22	All ages	441	Colon and rectum cancer	3	Rate	2011	341.65314918263897	400.34285532927987	289.2341324658162
2	DALYs (Disability-Adjusted Life Years)	68	Republic of Korea	3	Both	22	All ages	441	Colon and rectum cancer	3	Rate	2011	423.7555406048787	474.5258398581907	372.6895695243885
2	DALYs (Disability-Adjusted Life Years)	68	Republic of Korea	1	Male	27	Age-standardized	441	Colon and rectum cancer	3	Rate	2011	435.3366727739337	504.910746752185	366.4752402636519
2	DALYs (Disability-Adjusted Life Years)	68	Republic of Korea	2	Female	27	Age-standardized	441	Colon and rectum cancer	3	Rate	2011	235.83193643578696	276.7974357266528	200.56102674292282
2	DALYs (Disability-Adjusted Life Years)	68	Republic of Korea	3	Both	27	Age-standardized	441	Colon and rectum cancer	3	Rate	2011	322.5577238513454	359.9571070715578	283.8789987379144
2	DALYs (Disability-Adjusted Life Years)	68	Republic of Korea	1	Male	22	All ages	441	Colon and rectum cancer	1	Number	2012	128212.35489609277	152326.00810021727	108492.2434482146
2	DALYs (Disability-Adjusted Life Years)	68	Republic of Korea	2	Female	22	All ages	441	Colon and rectum cancer	1	Number	2012	86224.97039254816	101574.92282465514	72776.26539086501
2	DALYs (Disability-Adjusted Life Years)	68	Republic of Korea	3	Both	22	All ages	441	Colon and rectum cancer	1	Number	2012	214437.3252886408	241086.13623523896	188697.89203494356
2	DALYs (Disability-Adjusted Life Years)	68	Republic of Korea	1	Male	22	All ages	441	Colon and rectum cancer	3	Rate	2012	510.04918077287584	605.9771361729046	431.59943467086026
2	DALYs (Disability-Adjusted Life Years)	68	Republic of Korea	2	Female	22	All ages	441	Colon and rectum cancer	3	Rate	2012	342.3631950438218	403.31141844710834	288.9640278116807
2	DALYs (Disability-Adjusted Life Years)	68	Republic of Korea	3	Both	22	All ages	441	Colon and rectum cancer	3	Rate	2012	426.1262474060108	479.0823164635815	374.97727841009623
2	DALYs (Disability-Adjusted Life Years)	68	Republic of Korea	1	Male	27	Age-standardized	441	Colon and rectum cancer	3	Rate	2012	425.4343169205875	499.129302495383	359.1336631656171
2	DALYs (Disability-Adjusted Life Years)	68	Republic of Korea	2	Female	27	Age-standardized	441	Colon and rectum cancer	3	Rate	2012	228.88264290037134	269.2400772209895	193.85648108239243
2	DALYs (Disability-Adjusted Life Years)	68	Republic of Korea	3	Both	27	Age-standardized	441	Colon and rectum cancer	3	Rate	2012	314.73983869039245	353.39527138944356	276.2952709285869
2	DALYs (Disability-Adjusted Life Years)	68	Republic of Korea	1	Male	22	All ages	441	Colon and rectum cancer	1	Number	2013	129504.68027213537	153598.68674949324	109480.02128455024
2	DALYs (Disability-Adjusted Life Years)	68	Republic of Korea	2	Female	22	All ages	441	Colon and rectum cancer	1	Number	2013	87053.47570335297	103733.30973731211	73023.87226792434
2	DALYs (Disability-Adjusted Life Years)	68	Republic of Korea	3	Both	22	All ages	441	Colon and rectum cancer	1	Number	2013	216558.15597548833	244404.62748551928	189758.1970700727
2	DALYs (Disability-Adjusted Life Years)	68	Republic of Korea	1	Male	22	All ages	441	Colon and rectum cancer	3	Rate	2013	509.1103173152389	603.8289580416343	430.3891431470459
2	DALYs (Disability-Adjusted Life Years)	68	Republic of Korea	2	Female	22	All ages	441	Colon and rectum cancer	3	Rate	2013	342.7546331342127	408.427948861789	287.51603938851076
2	DALYs (Disability-Adjusted Life Years)	68	Republic of Korea	3	Both	22	All ages	441	Colon and rectum cancer	3	Rate	2013	425.9967108762344	480.774168780543	373.2778728629596
2	DALYs (Disability-Adjusted Life Years)	68	Republic of Korea	1	Male	27	Age-standardized	441	Colon and rectum cancer	3	Rate	2013	411.8896194187662	484.31227412107927	346.10610765544783
2	DALYs (Disability-Adjusted Life Years)	68	Republic of Korea	2	Female	27	Age-standardized	441	Colon and rectum cancer	3	Rate	2013	222.6600945895777	265.78194490494946	187.65816502350677
2	DALYs (Disability-Adjusted Life Years)	68	Republic of Korea	3	Both	27	Age-standardized	441	Colon and rectum cancer	3	Rate	2013	305.7013587967772	344.29343697459353	267.85195410882403
2	DALYs (Disability-Adjusted Life Years)	6	China	1	Male	22	All ages	441	Colon and rectum cancer	1	Number	1993	2163307.5440727086	2562466.8729071356	1785304.7245768309
2	DALYs (Disability-Adjusted Life Years)	6	China	2	Female	22	All ages	441	Colon and rectum cancer	1	Number	1993	1584127.404509769	1870162.265056387	1329503.752115088
2	DALYs (Disability-Adjusted Life Years)	6	China	3	Both	22	All ages	441	Colon and rectum cancer	1	Number	1993	3747434.9485824774	4233124.884360329	3298904.420894526
2	DALYs (Disability-Adjusted Life Years)	6	China	1	Male	22	All ages	441	Colon and rectum cancer	3	Rate	1993	343.81018374107	407.2477853731347	283.7349442395923
2	DALYs (Disability-Adjusted Life Years)	6	China	2	Female	22	All ages	441	Colon and rectum cancer	3	Rate	1993	269.39543751273766	318.0382967811803	226.09434314199592
2	DALYs (Disability-Adjusted Life Years)	6	China	3	Both	22	All ages	441	Colon and rectum cancer	3	Rate	1993	307.8617104317435	347.76242556613516	271.0137391315084
2	DALYs (Disability-Adjusted Life Years)	6	China	1	Male	27	Age-standardized	441	Colon and rectum cancer	3	Rate	1993	446.62266710344034	525.757250209497	370.73202434894046
2	DALYs (Disability-Adjusted Life Years)	6	China	2	Female	27	Age-standardized	441	Colon and rectum cancer	3	Rate	1993	322.3571156388076	380.41647722807704	271.2675470344314
2	DALYs (Disability-Adjusted Life Years)	6	China	3	Both	27	Age-standardized	441	Colon and rectum cancer	3	Rate	1993	381.07552660931935	427.73176404720806	336.0030189782897
2	DALYs (Disability-Adjusted Life Years)	71	Australia	1	Male	22	All ages	441	Colon and rectum cancer	1	Number	1993	60314.89415974795	64974.55893519982	56108.258573054525
2	DALYs (Disability-Adjusted Life Years)	71	Australia	2	Female	22	All ages	441	Colon and rectum cancer	1	Number	1993	50385.63825914601	55134.833788683216	45801.998159280294
2	DALYs (Disability-Adjusted Life Years)	71	Australia	3	Both	22	All ages	441	Colon and rectum cancer	1	Number	1993	110700.53241889394	119718.61111290466	102502.46027274415
2	DALYs (Disability-Adjusted Life Years)	71	Australia	1	Male	22	All ages	441	Colon and rectum cancer	3	Rate	1993	694.2267628604498	747.8596845150761	645.8082246773442
2	DALYs (Disability-Adjusted Life Years)	71	Australia	2	Female	22	All ages	441	Colon and rectum cancer	3	Rate	1993	571.3427950228175	625.1958123052397	519.367076613404
2	DALYs (Disability-Adjusted Life Years)	71	Australia	3	Both	22	All ages	441	Colon and rectum cancer	3	Rate	1993	632.3259267928137	683.8375577080382	585.498206505863
2	DALYs (Disability-Adjusted Life Years)	71	Australia	1	Male	27	Age-standardized	441	Colon and rectum cancer	3	Rate	1993	635.1408344092649	684.9571209668087	590.2471701155645
2	DALYs (Disability-Adjusted Life Years)	71	Australia	2	Female	27	Age-standardized	441	Colon and rectum cancer	3	Rate	1993	450.9183024907823	493.50774819430404	412.2350518630192
2	DALYs (Disability-Adjusted Life Years)	71	Australia	3	Both	27	Age-standardized	441	Colon and rectum cancer	3	Rate	1993	536.4038961534835	580.5383459412816	496.73093978372833
2	DALYs (Disability-Adjusted Life Years)	6	China	1	Male	22	All ages	441	Colon and rectum cancer	1	Number	1994	2180234.109390242	2541680.1938625574	1839957.3615260022
2	DALYs (Disability-Adjusted Life Years)	6	China	2	Female	22	All ages	441	Colon and rectum cancer	1	Number	1994	1603558.2861228194	1880977.501843993	1372494.2590583689
2	DALYs (Disability-Adjusted Life Years)	6	China	3	Both	22	All ages	441	Colon and rectum cancer	1	Number	1994	3783792.395513057	4212872.451213276	3381941.157761967
2	DALYs (Disability-Adjusted Life Years)	6	China	1	Male	22	All ages	441	Colon and rectum cancer	3	Rate	1994	343.86706467588147	400.87443079806667	290.19853157589444
2	DALYs (Disability-Adjusted Life Years)	6	China	2	Female	22	All ages	441	Colon and rectum cancer	3	Rate	1994	270.7459441225056	317.5856057226833	231.73292619749233
2	DALYs (Disability-Adjusted Life Years)	6	China	3	Both	22	All ages	441	Colon and rectum cancer	3	Rate	1994	308.5515119486231	343.54109015336235	275.7823232548781
2	DALYs (Disability-Adjusted Life Years)	6	China	1	Male	27	Age-standardized	441	Colon and rectum cancer	3	Rate	1994	439.9013102215087	509.7967388082484	371.95141138085535
2	DALYs (Disability-Adjusted Life Years)	6	China	2	Female	27	Age-standardized	441	Colon and rectum cancer	3	Rate	1994	318.8095252745012	371.6490240820212	274.221099173288
2	DALYs (Disability-Adjusted Life Years)	6	China	3	Both	27	Age-standardized	441	Colon and rectum cancer	3	Rate	1994	375.9875544349879	417.53541747029925	336.00756289602583
2	DALYs (Disability-Adjusted Life Years)	71	Australia	1	Male	22	All ages	441	Colon and rectum cancer	1	Number	1994	62198.214144936675	67011.95602676446	57894.82127585965
2	DALYs (Disability-Adjusted Life Years)	71	Australia	2	Female	22	All ages	441	Colon and rectum cancer	1	Number	1994	51129.864933457335	55843.64200965149	46095.480659103414
2	DALYs (Disability-Adjusted Life Years)	71	Australia	3	Both	22	All ages	441	Colon and rectum cancer	1	Number	1994	113328.07907839384	122618.64226826589	104852.71176050889
2	DALYs (Disability-Adjusted Life Years)	71	Australia	1	Male	22	All ages	441	Colon and rectum cancer	3	Rate	1994	708.5293090763591	763.3649222284619	659.5073231861182
2	DALYs (Disability-Adjusted Life Years)	71	Australia	2	Female	22	All ages	441	Colon and rectum cancer	3	Rate	1994	573.1150643281251	625.9518292162655	516.6846107956569
2	DALYs (Disability-Adjusted Life Years)	71	Australia	3	Both	22	All ages	441	Colon and rectum cancer	3	Rate	1994	640.2755516269152	692.7649304260132	592.3918274093203
2	DALYs (Disability-Adjusted Life Years)	71	Australia	1	Male	27	Age-standardized	441	Colon and rectum cancer	3	Rate	1994	640.1134708375462	689.6955107699878	596.7724817292883
2	DALYs (Disability-Adjusted Life Years)	71	Australia	2	Female	27	Age-standardized	441	Colon and rectum cancer	3	Rate	1994	447.141393401228	487.2424567756347	405.458197629628
2	DALYs (Disability-Adjusted Life Years)	71	Australia	3	Both	27	Age-standardized	441	Colon and rectum cancer	3	Rate	1994	536.953235503534	580.8137288369693	496.8007598833297
2	DALYs (Disability-Adjusted Life Years)	6	China	1	Male	22	All ages	441	Colon and rectum cancer	1	Number	1995	2216109.9559564693	2530216.5916677588	1886071.9268130355
2	DALYs (Disability-Adjusted Life Years)	6	China	2	Female	22	All ages	441	Colon and rectum cancer	1	Number	1995	1611361.991361455	1854542.71754802	1401136.9566486743
2	DALYs (Disability-Adjusted Life Years)	6	China	3	Both	22	All ages	441	Colon and rectum cancer	1	Number	1995	3827471.947317924	4211608.866209939	3433604.717812475
2	DALYs (Disability-Adjusted Life Years)	6	China	1	Male	22	All ages	441	Colon and rectum cancer	3	Rate	1995	347.44707588329425	396.6934735180744	295.7029158753675
2	DALYs (Disability-Adjusted Life Years)	6	China	2	Female	22	All ages	441	Colon and rectum cancer	3	Rate	1995	270.3989628207496	311.2065631559705	235.12158154327307
2	DALYs (Disability-Adjusted Life Years)	6	China	3	Both	22	All ages	441	Colon and rectum cancer	3	Rate	1995	310.2315586330859	341.36735707045653	278.3070804956055
2	DALYs (Disability-Adjusted Life Years)	6	China	1	Male	27	Age-standardized	441	Colon and rectum cancer	3	Rate	1995	437.90048382590373	500.1536065192726	375.3058594499166
2	DALYs (Disability-Adjusted Life Years)	6	China	2	Female	27	Age-standardized	441	Colon and rectum cancer	3	Rate	1995	313.3579828513621	361.32278691506644	272.6106601319888
2	DALYs (Disability-Adjusted Life Years)	6	China	3	Both	27	Age-standardized	441	Colon and rectum cancer	3	Rate	1995	372.2658747307351	408.2182378305678	333.46418754550933
2	DALYs (Disability-Adjusted Life Years)	71	Australia	1	Male	22	All ages	441	Colon and rectum cancer	1	Number	1995	62100.18138269784	66600.1536831891	57953.7795307288
2	DALYs (Disability-Adjusted Life Years)	71	Australia	2	Female	22	All ages	441	Colon and rectum cancer	1	Number	1995	50832.29572010696	55190.65429827586	45617.91679938459
2	DALYs (Disability-Adjusted Life Years)	71	Australia	3	Both	22	All ages	441	Colon and rectum cancer	1	Number	1995	112932.4771028047	121617.71952967491	104171.08797865448
2	DALYs (Disability-Adjusted Life Years)	71	Australia	1	Male	22	All ages	441	Colon and rectum cancer	3	Rate	1995	700.4048088919118	751.1583198957084	653.6390872457822
2	DALYs (Disability-Adjusted Life Years)	71	Australia	2	Female	22	All ages	441	Colon and rectum cancer	3	Rate	1995	563.4940266764083	611.8079772883341	505.690786963743
2	DALYs (Disability-Adjusted Life Years)	71	Australia	3	Both	22	All ages	441	Colon and rectum cancer	3	Rate	1995	631.3578164257357	679.9133412351775	582.3765875694505
2	DALYs (Disability-Adjusted Life Years)	71	Australia	1	Male	27	Age-standardized	441	Colon and rectum cancer	3	Rate	1995	624.6985112312324	669.4807133875979	583.2165610850162
2	DALYs (Disability-Adjusted Life Years)	71	Australia	2	Female	27	Age-standardized	441	Colon and rectum cancer	3	Rate	1995	434.25578030405427	472.19830631008483	390.17310825939563
2	DALYs (Disability-Adjusted Life Years)	71	Australia	3	Both	27	Age-standardized	441	Colon and rectum cancer	3	Rate	1995	522.7452863270124	562.3129138895531	482.12121800885865
2	DALYs (Disability-Adjusted Life Years)	71	Australia	1	Male	22	All ages	441	Colon and rectum cancer	1	Number	1992	59274.75147200139	63927.97481622308	54794.505363799704
2	DALYs (Disability-Adjusted Life Years)	71	Australia	2	Female	22	All ages	441	Colon and rectum cancer	1	Number	1992	50137.68298428946	55114.259935778915	45466.76321865313
2	DALYs (Disability-Adjusted Life Years)	71	Australia	3	Both	22	All ages	441	Colon and rectum cancer	1	Number	1992	109412.43445629076	118494.72702146662	100991.21820263256
2	DALYs (Disability-Adjusted Life Years)	71	Australia	1	Male	22	All ages	441	Colon and rectum cancer	3	Rate	1992	689.8410377533932	743.9953672269212	637.6998216720016
2	DALYs (Disability-Adjusted Life Years)	71	Australia	2	Female	22	All ages	441	Colon and rectum cancer	3	Rate	1992	575.5660938619898	632.695757346238	521.9452864327255
2	DALYs (Disability-Adjusted Life Years)	71	Australia	3	Both	22	All ages	441	Colon and rectum cancer	3	Rate	1992	632.312278374702	684.8003263126727	583.6446981083658
2	DALYs (Disability-Adjusted Life Years)	71	Australia	1	Male	27	Age-standardized	441	Colon and rectum cancer	3	Rate	1992	638.9829339187424	689.5499262584536	592.1310454322387
2	DALYs (Disability-Adjusted Life Years)	71	Australia	2	Female	27	Age-standardized	441	Colon and rectum cancer	3	Rate	1992	459.3866521144577	502.9032644027622	418.9773195877579
2	DALYs (Disability-Adjusted Life Years)	71	Australia	3	Both	27	Age-standardized	441	Colon and rectum cancer	3	Rate	1992	542.0435726519241	587.0224655386342	500.85939942510856
2	DALYs (Disability-Adjusted Life Years)	68	Republic of Korea	1	Male	22	All ages	441	Colon and rectum cancer	1	Number	2014	130917.90633361701	154443.2336859157	110248.16396060042
2	DALYs (Disability-Adjusted Life Years)	68	Republic of Korea	2	Female	22	All ages	441	Colon and rectum cancer	1	Number	2014	87434.15171737384	103964.74260721967	72915.71325890326
2	DALYs (Disability-Adjusted Life Years)	68	Republic of Korea	3	Both	22	All ages	441	Colon and rectum cancer	1	Number	2014	218352.05805099092	245552.21494454538	191467.43316934333
2	DALYs (Disability-Adjusted Life Years)	68	Republic of Korea	1	Male	22	All ages	441	Colon and rectum cancer	3	Rate	2014	509.16576421479533	600.6604391236054	428.7770269807846
2	DALYs (Disability-Adjusted Life Years)	68	Republic of Korea	2	Female	22	All ages	441	Colon and rectum cancer	3	Rate	2014	341.70848230356944	406.313021989725	284.967798330353
2	DALYs (Disability-Adjusted Life Years)	68	Republic of Korea	3	Both	22	All ages	441	Colon and rectum cancer	3	Rate	2014	425.64095403613493	478.6631276462476	373.23385750739124
2	DALYs (Disability-Adjusted Life Years)	68	Republic of Korea	1	Male	27	Age-standardized	441	Colon and rectum cancer	3	Rate	2014	399.67855823589986	465.22567680341126	337.15225069011854
2	DALYs (Disability-Adjusted Life Years)	68	Republic of Korea	2	Female	27	Age-standardized	441	Colon and rectum cancer	3	Rate	2014	215.94247466971206	257.02463018306076	181.00803681226273
2	DALYs (Disability-Adjusted Life Years)	68	Republic of Korea	3	Both	27	Age-standardized	441	Colon and rectum cancer	3	Rate	2014	296.9819735737178	334.7332918811071	260.9974957846565
2	DALYs (Disability-Adjusted Life Years)	68	Republic of Korea	1	Male	22	All ages	441	Colon and rectum cancer	1	Number	2015	132553.60343223187	154992.80661715582	111846.83615545981
2	DALYs (Disability-Adjusted Life Years)	68	Republic of Korea	2	Female	22	All ages	441	Colon and rectum cancer	1	Number	2015	88707.12962027358	106181.50446182984	73590.4508255088
2	DALYs (Disability-Adjusted Life Years)	68	Republic of Korea	3	Both	22	All ages	441	Colon and rectum cancer	1	Number	2015	221260.73305250568	247890.67008641548	195157.19483371457
2	DALYs (Disability-Adjusted Life Years)	68	Republic of Korea	1	Male	22	All ages	441	Colon and rectum cancer	3	Rate	2015	511.2106561930544	597.7504369880664	431.35224560969124
2	DALYs (Disability-Adjusted Life Years)	68	Republic of Korea	2	Female	22	All ages	441	Colon and rectum cancer	3	Rate	2015	344.7083016946271	412.61222441868574	285.96618370577403
2	DALYs (Disability-Adjusted Life Years)	68	Republic of Korea	3	Both	22	All ages	441	Colon and rectum cancer	3	Rate	2015	428.27431930359245	479.81947148199026	377.74806953556356
2	DALYs (Disability-Adjusted Life Years)	68	Republic of Korea	1	Male	27	Age-standardized	441	Colon and rectum cancer	3	Rate	2015	390.2066763499016	452.2334096171588	329.60999454397313
2	DALYs (Disability-Adjusted Life Years)	68	Republic of Korea	2	Female	27	Age-standardized	441	Colon and rectum cancer	3	Rate	2015	211.92250283473152	253.84858567282558	177.10145926740427
2	DALYs (Disability-Adjusted Life Years)	68	Republic of Korea	3	Both	27	Age-standardized	441	Colon and rectum cancer	3	Rate	2015	290.72462114095254	325.06971842509995	256.1656453033065
2	DALYs (Disability-Adjusted Life Years)	68	Republic of Korea	1	Male	22	All ages	441	Colon and rectum cancer	1	Number	2016	134354.90966080266	154991.03645801172	113750.81227367332
2	DALYs (Disability-Adjusted Life Years)	68	Republic of Korea	2	Female	22	All ages	441	Colon and rectum cancer	1	Number	2016	90080.8978504115	110022.42995128412	73966.88367936871
2	DALYs (Disability-Adjusted Life Years)	68	Republic of Korea	3	Both	22	All ages	441	Colon and rectum cancer	1	Number	2016	224435.80751121414	253213.57615322835	197382.1362235127
2	DALYs (Disability-Adjusted Life Years)	68	Republic of Korea	1	Male	22	All ages	441	Colon and rectum cancer	3	Rate	2016	515.6613940928452	594.8639624231787	436.5817563669483
2	DALYs (Disability-Adjusted Life Years)	68	Republic of Korea	2	Female	22	All ages	441	Colon and rectum cancer	3	Rate	2016	348.92908486869857	426.17277041002205	286.51132092056196
2	DALYs (Disability-Adjusted Life Years)	68	Republic of Korea	3	Both	22	All ages	441	Colon and rectum cancer	3	Rate	2016	432.67851750554195	488.1577318573874	380.5231038233468
2	DALYs (Disability-Adjusted Life Years)	68	Republic of Korea	1	Male	27	Age-standardized	441	Colon and rectum cancer	3	Rate	2016	382.1861149392259	439.61951100887563	323.74227332768146
2	DALYs (Disability-Adjusted Life Years)	68	Republic of Korea	2	Female	27	Age-standardized	441	Colon and rectum cancer	3	Rate	2016	208.63512177096925	254.09209852720076	172.27715703066676
2	DALYs (Disability-Adjusted Life Years)	68	Republic of Korea	3	Both	27	Age-standardized	441	Colon and rectum cancer	3	Rate	2016	285.6619604194668	322.89067182815694	251.56236872089312
2	DALYs (Disability-Adjusted Life Years)	68	Republic of Korea	1	Male	22	All ages	441	Colon and rectum cancer	1	Number	2018	139631.49750786324	164876.61638812604	115902.4408076073
2	DALYs (Disability-Adjusted Life Years)	68	Republic of Korea	2	Female	22	All ages	441	Colon and rectum cancer	1	Number	2018	91728.45142291565	111466.85510910803	73124.57056345919
2	DALYs (Disability-Adjusted Life Years)	68	Republic of Korea	3	Both	22	All ages	441	Colon and rectum cancer	1	Number	2018	231359.94893077886	264208.1168658852	199663.87607022125
2	DALYs (Disability-Adjusted Life Years)	68	Republic of Korea	1	Male	22	All ages	441	Colon and rectum cancer	3	Rate	2018	535.0620995315934	631.8003466469147	444.1333397277519
2	DALYs (Disability-Adjusted Life Years)	68	Republic of Korea	2	Female	22	All ages	441	Colon and rectum cancer	3	Rate	2018	354.9415758392808	431.31897020548223	282.9541969339384
2	DALYs (Disability-Adjusted Life Years)	68	Republic of Korea	3	Both	22	All ages	441	Colon and rectum cancer	3	Rate	2018	445.4406339728251	508.68368367732415	384.4157294692377
2	DALYs (Disability-Adjusted Life Years)	68	Republic of Korea	1	Male	27	Age-standardized	441	Colon and rectum cancer	3	Rate	2018	369.7725479417988	435.7347605769481	303.83378214074486
2	DALYs (Disability-Adjusted Life Years)	68	Republic of Korea	2	Female	27	Age-standardized	441	Colon and rectum cancer	3	Rate	2018	199.56260604292595	241.22196864167742	159.81410770265532
2	DALYs (Disability-Adjusted Life Years)	68	Republic of Korea	3	Both	27	Age-standardized	441	Colon and rectum cancer	3	Rate	2018	275.7670840952688	315.0084908760193	237.26635077525367
2	DALYs (Disability-Adjusted Life Years)	71	Australia	1	Male	22	All ages	441	Colon and rectum cancer	1	Number	1996	63172.98349410454	67640.75099104462	59101.530285593355
2	DALYs (Disability-Adjusted Life Years)	71	Australia	2	Female	22	All ages	441	Colon and rectum cancer	1	Number	1996	51046.52787216926	55872.57625450585	45771.090075160784
2	DALYs (Disability-Adjusted Life Years)	71	Australia	3	Both	22	All ages	441	Colon and rectum cancer	1	Number	1996	114219.51136627367	122969.25674404764	105259.88416301266
2	DALYs (Disability-Adjusted Life Years)	71	Australia	1	Male	22	All ages	441	Colon and rectum cancer	3	Rate	1996	705.4821849664199	755.3758293905015	660.0143671325973
2	DALYs (Disability-Adjusted Life Years)	71	Australia	2	Female	22	All ages	441	Colon and rectum cancer	3	Rate	1996	559.6841604503692	612.5979030642633	501.8432240046883
2	DALYs (Disability-Adjusted Life Years)	71	Australia	3	Both	22	All ages	441	Colon and rectum cancer	3	Rate	1996	631.9136254609972	680.3211458346335	582.3449445844348
2	DALYs (Disability-Adjusted Life Years)	71	Australia	1	Male	27	Age-standardized	441	Colon and rectum cancer	3	Rate	1996	620.0961350774057	663.7317211103613	579.788250224466
2	DALYs (Disability-Adjusted Life Years)	71	Australia	2	Female	27	Age-standardized	441	Colon and rectum cancer	3	Rate	1996	425.6254888474807	466.86323948422813	382.3628966565524
2	DALYs (Disability-Adjusted Life Years)	71	Australia	3	Both	27	Age-standardized	441	Colon and rectum cancer	3	Rate	1996	516.3795285742544	555.7098440809746	475.94320614364335
2	DALYs (Disability-Adjusted Life Years)	6	China	1	Male	22	All ages	441	Colon and rectum cancer	1	Number	1997	2276947.3431668966	2575549.1691493783	1946848.1092663896
2	DALYs (Disability-Adjusted Life Years)	6	China	2	Female	22	All ages	441	Colon and rectum cancer	1	Number	1997	1616714.3832980732	1855345.6355607507	1428056.2083013998
2	DALYs (Disability-Adjusted Life Years)	6	China	3	Both	22	All ages	441	Colon and rectum cancer	1	Number	1997	3893661.7264649677	4231718.656432271	3499493.0193268163
2	DALYs (Disability-Adjusted Life Years)	6	China	1	Male	22	All ages	441	Colon and rectum cancer	3	Rate	1997	354.10542449631794	400.5432688593929	302.76917831696073
2	DALYs (Disability-Adjusted Life Years)	6	China	2	Female	22	All ages	441	Colon and rectum cancer	3	Rate	1997	268.56738358727523	308.2086286485102	237.22762872726952
2	DALYs (Disability-Adjusted Life Years)	6	China	3	Both	22	All ages	441	Colon and rectum cancer	3	Rate	1997	312.7461352720874	339.8994952136063	281.0857732625263
2	DALYs (Disability-Adjusted Life Years)	6	China	1	Male	27	Age-standardized	441	Colon and rectum cancer	3	Rate	1997	430.35238224811934	488.746293450117	370.8518454037552
2	DALYs (Disability-Adjusted Life Years)	6	China	2	Female	27	Age-standardized	441	Colon and rectum cancer	3	Rate	1997	299.976344992207	344.75158179483316	265.5569721154157
2	DALYs (Disability-Adjusted Life Years)	6	China	3	Both	27	Age-standardized	441	Colon and rectum cancer	3	Rate	1997	361.65211150482395	395.114893541573	324.96610470901896
2	DALYs (Disability-Adjusted Life Years)	71	Australia	1	Male	22	All ages	441	Colon and rectum cancer	1	Number	1997	63414.31342208499	67846.73463486407	59378.75862674044
2	DALYs (Disability-Adjusted Life Years)	71	Australia	2	Female	22	All ages	441	Colon and rectum cancer	1	Number	1997	51465.44980381199	56339.362068705814	46224.20305650346
2	DALYs (Disability-Adjusted Life Years)	71	Australia	3	Both	22	All ages	441	Colon and rectum cancer	1	Number	1997	114879.763225897	122913.8162346358	105908.74623531412
2	DALYs (Disability-Adjusted Life Years)	71	Australia	1	Male	22	All ages	441	Colon and rectum cancer	3	Rate	1997	701.0804548791077	750.0833331313335	656.4651552892767
2	DALYs (Disability-Adjusted Life Years)	71	Australia	2	Female	22	All ages	441	Colon and rectum cancer	3	Rate	1997	558.0522075896869	610.9012064693394	501.22011287357054
2	DALYs (Disability-Adjusted Life Years)	71	Australia	3	Both	22	All ages	441	Colon and rectum cancer	3	Rate	1997	628.8729792911199	672.8528649516899	579.7639802496997
2	DALYs (Disability-Adjusted Life Years)	71	Australia	1	Male	27	Age-standardized	441	Colon and rectum cancer	3	Rate	1997	606.617600173815	648.2022913979437	567.8492242851809
2	DALYs (Disability-Adjusted Life Years)	71	Australia	2	Female	27	Age-standardized	441	Colon and rectum cancer	3	Rate	1997	418.8394334825975	460.11561039729037	376.33109663355907
2	DALYs (Disability-Adjusted Life Years)	71	Australia	3	Both	27	Age-standardized	441	Colon and rectum cancer	3	Rate	1997	506.64771812577845	541.9500476465065	467.42068194119327
2	DALYs (Disability-Adjusted Life Years)	6	China	1	Male	22	All ages	441	Colon and rectum cancer	1	Number	1998	2317697.2659488413	2618848.066799493	2006401.1232778104
2	DALYs (Disability-Adjusted Life Years)	6	China	2	Female	22	All ages	441	Colon and rectum cancer	1	Number	1998	1638701.7129289666	1872487.8971986442	1440136.9658375457
2	DALYs (Disability-Adjusted Life Years)	6	China	3	Both	22	All ages	441	Colon and rectum cancer	1	Number	1998	3956398.9788778066	4330625.524112941	3603170.7740473226
2	DALYs (Disability-Adjusted Life Years)	6	China	1	Male	22	All ages	441	Colon and rectum cancer	3	Rate	1998	359.3856895057498	406.08259414424725	311.1156326187004
2	DALYs (Disability-Adjusted Life Years)	6	China	2	Female	22	All ages	441	Colon and rectum cancer	3	Rate	1998	270.99348154092263	309.6548996083815	238.1566621850565
2	DALYs (Disability-Adjusted Life Years)	6	China	3	Both	22	All ages	441	Colon and rectum cancer	3	Rate	1998	316.61151210083005	346.5590560638438	288.3443639580099
2	DALYs (Disability-Adjusted Life Years)	6	China	1	Male	27	Age-standardized	441	Colon and rectum cancer	3	Rate	1998	428.3663887161021	483.2291092915474	371.51280125614386
2	DALYs (Disability-Adjusted Life Years)	6	China	2	Female	27	Age-standardized	441	Colon and rectum cancer	3	Rate	1998	296.983019417206	340.6792992807961	260.15520875081535
2	DALYs (Disability-Adjusted Life Years)	6	China	3	Both	27	Age-standardized	441	Colon and rectum cancer	3	Rate	1998	359.0939344607142	393.2804073860598	326.23454879710346
2	DALYs (Disability-Adjusted Life Years)	71	Australia	1	Male	22	All ages	441	Colon and rectum cancer	1	Number	1998	63301.25410479987	67501.87811172917	59274.358418002776
2	DALYs (Disability-Adjusted Life Years)	71	Australia	2	Female	22	All ages	441	Colon and rectum cancer	1	Number	1998	51763.61791522845	56583.10040783979	46412.79838496391
2	DALYs (Disability-Adjusted Life Years)	71	Australia	3	Both	22	All ages	441	Colon and rectum cancer	1	Number	1998	115064.87202002843	123717.0640089015	105945.7127451319
2	DALYs (Disability-Adjusted Life Years)	71	Australia	1	Male	22	All ages	441	Colon and rectum cancer	3	Rate	1998	692.6271635812001	738.5893855361348	648.5658353022056
2	DALYs (Disability-Adjusted Life Years)	71	Australia	2	Female	22	All ages	441	Colon and rectum cancer	3	Rate	1998	555.0230136893665	606.6987621243561	497.6501309388032
2	DALYs (Disability-Adjusted Life Years)	71	Australia	3	Both	22	All ages	441	Colon and rectum cancer	3	Rate	1998	623.1279865938309	669.9834940914743	573.7436414097891
2	DALYs (Disability-Adjusted Life Years)	71	Australia	1	Male	27	Age-standardized	441	Colon and rectum cancer	3	Rate	1998	590.8380842961611	631.1115716929164	553.027589805185
2	DALYs (Disability-Adjusted Life Years)	71	Australia	2	Female	27	Age-standardized	441	Colon and rectum cancer	3	Rate	1998	410.6887342018965	449.21596377303916	368.68910383083704
2	DALYs (Disability-Adjusted Life Years)	71	Australia	3	Both	27	Age-standardized	441	Colon and rectum cancer	3	Rate	1998	495.0872028166941	532.8797398274942	457.05958179661496
2	DALYs (Disability-Adjusted Life Years)	68	Republic of Korea	1	Male	22	All ages	441	Colon and rectum cancer	1	Number	2017	135998.60979686485	158773.04179671247	113930.39319130479
2	DALYs (Disability-Adjusted Life Years)	68	Republic of Korea	2	Female	22	All ages	441	Colon and rectum cancer	1	Number	2017	90031.46124561378	109444.06192135382	72241.10734455715
2	DALYs (Disability-Adjusted Life Years)	68	Republic of Korea	3	Both	22	All ages	441	Colon and rectum cancer	1	Number	2017	226030.071042479	257063.10037246265	196363.28804590175
2	DALYs (Disability-Adjusted Life Years)	68	Republic of Korea	1	Male	22	All ages	441	Colon and rectum cancer	3	Rate	2017	520.9712810498825	608.213533245446	436.43433546891447
2	DALYs (Disability-Adjusted Life Years)	68	Republic of Korea	2	Female	22	All ages	441	Colon and rectum cancer	3	Rate	2017	348.29497533350377	423.39440368856015	279.4713575957131
2	DALYs (Disability-Adjusted Life Years)	68	Republic of Korea	3	Both	22	All ages	441	Colon and rectum cancer	3	Rate	2017	435.0579222244268	494.7896437531751	377.95592287519827
2	DALYs (Disability-Adjusted Life Years)	68	Republic of Korea	1	Male	27	Age-standardized	441	Colon and rectum cancer	3	Rate	2017	372.7310702997963	433.5701357399692	310.70905207001425
2	DALYs (Disability-Adjusted Life Years)	68	Republic of Korea	2	Female	27	Age-standardized	441	Colon and rectum cancer	3	Rate	2017	201.59064364454463	244.55345920090286	162.50022456520347
2	DALYs (Disability-Adjusted Life Years)	68	Republic of Korea	3	Both	27	Age-standardized	441	Colon and rectum cancer	3	Rate	2017	277.9875879185052	315.9458389512525	242.04426022637068
2	DALYs (Disability-Adjusted Life Years)	68	Republic of Korea	1	Male	22	All ages	441	Colon and rectum cancer	1	Number	2019	141592.31404845693	167508.71789970325	116122.79014012837
2	DALYs (Disability-Adjusted Life Years)	68	Republic of Korea	2	Female	22	All ages	441	Colon and rectum cancer	1	Number	2019	92086.60675109878	113563.28611418066	72087.47654325007
2	DALYs (Disability-Adjusted Life Years)	68	Republic of Korea	3	Both	22	All ages	441	Colon and rectum cancer	1	Number	2019	233678.92079955596	270013.6749539333	198980.77705561518
2	DALYs (Disability-Adjusted Life Years)	68	Republic of Korea	1	Male	22	All ages	441	Colon and rectum cancer	3	Rate	2019	543.660699954189	643.1698460031904	445.86740313185504
2	DALYs (Disability-Adjusted Life Years)	68	Republic of Korea	2	Female	22	All ages	441	Colon and rectum cancer	3	Rate	2019	356.83646054408865	440.058793503718	279.3396443499796
2	DALYs (Disability-Adjusted Life Years)	68	Republic of Korea	3	Both	22	All ages	441	Colon and rectum cancer	3	Rate	2019	450.67708818597185	520.7529048074215	383.7576658672121
2	DALYs (Disability-Adjusted Life Years)	68	Republic of Korea	1	Male	27	Age-standardized	441	Colon and rectum cancer	3	Rate	2019	362.2244267516938	431.21291474432445	294.4929648181965
2	DALYs (Disability-Adjusted Life Years)	68	Republic of Korea	2	Female	27	Age-standardized	441	Colon and rectum cancer	3	Rate	2019	195.16606104272256	239.47807165135413	153.84950943562757
2	DALYs (Disability-Adjusted Life Years)	68	Republic of Korea	3	Both	27	Age-standardized	441	Colon and rectum cancer	3	Rate	2019	270.2478484560394	311.96821045919404	230.75978511032503
2	DALYs (Disability-Adjusted Life Years)	68	Republic of Korea	1	Male	22	All ages	441	Colon and rectum cancer	1	Number	2020	141882.68843448334	170340.30396343302	115875.7625299377
2	DALYs (Disability-Adjusted Life Years)	68	Republic of Korea	2	Female	22	All ages	441	Colon and rectum cancer	1	Number	2020	91466.05246257712	114454.43072309115	71040.1112326201
2	DALYs (Disability-Adjusted Life Years)	68	Republic of Korea	3	Both	22	All ages	441	Colon and rectum cancer	1	Number	2020	233348.74089706063	270963.3462307474	196128.97384514593
2	DALYs (Disability-Adjusted Life Years)	68	Republic of Korea	1	Male	22	All ages	441	Colon and rectum cancer	3	Rate	2020	546.3460845400477	655.9275069893898	446.2015052707246
2	DALYs (Disability-Adjusted Life Years)	68	Republic of Korea	2	Female	22	All ages	441	Colon and rectum cancer	3	Rate	2020	355.16366771154674	444.4277883106626	275.8495177250236
2	DALYs (Disability-Adjusted Life Years)	68	Republic of Korea	3	Both	22	All ages	441	Colon and rectum cancer	3	Rate	2020	451.1543865442294	523.8781309672127	379.19401895418855
2	DALYs (Disability-Adjusted Life Years)	68	Republic of Korea	1	Male	27	Age-standardized	441	Colon and rectum cancer	3	Rate	2020	352.220868376156	424.1069902906452	285.9759167570482
2	DALYs (Disability-Adjusted Life Years)	68	Republic of Korea	2	Female	27	Age-standardized	441	Colon and rectum cancer	3	Rate	2020	189.48932857842863	236.21335346671333	148.3644002682276
2	DALYs (Disability-Adjusted Life Years)	68	Republic of Korea	3	Both	27	Age-standardized	441	Colon and rectum cancer	3	Rate	2020	262.27871478427085	304.8695178345718	220.3396192942405
2	DALYs (Disability-Adjusted Life Years)	6	China	1	Male	22	All ages	441	Colon and rectum cancer	1	Number	1996	2245435.904003517	2546303.6345223016	1903534.0448243236
2	DALYs (Disability-Adjusted Life Years)	6	China	2	Female	22	All ages	441	Colon and rectum cancer	1	Number	1996	1614799.3488334743	1866310.673532339	1423244.3348185197
2	DALYs (Disability-Adjusted Life Years)	6	China	3	Both	22	All ages	441	Colon and rectum cancer	1	Number	1996	3860235.252836998	4220821.603176222	3507598.9897587327
2	DALYs (Disability-Adjusted Life Years)	6	China	1	Male	22	All ages	441	Colon and rectum cancer	3	Rate	1996	350.44182144075336	397.39779792075814	297.0817099046774
2	DALYs (Disability-Adjusted Life Years)	6	China	2	Female	22	All ages	441	Colon and rectum cancer	3	Rate	1996	269.53409610540734	311.5150874972811	237.56070721701215
2	DALYs (Disability-Adjusted Life Years)	6	China	3	Both	22	All ages	441	Colon and rectum cancer	3	Rate	1996	311.34647816980953	340.42949588789196	282.90467310010837
2	DALYs (Disability-Adjusted Life Years)	6	China	1	Male	27	Age-standardized	441	Colon and rectum cancer	3	Rate	1996	434.02588818860846	492.9002613829736	368.5289785612388
2	DALYs (Disability-Adjusted Life Years)	6	China	2	Female	27	Age-standardized	441	Colon and rectum cancer	3	Rate	1996	306.7863569464644	353.4920060860571	271.1386112323605
2	DALYs (Disability-Adjusted Life Years)	6	China	3	Both	27	Age-standardized	441	Colon and rectum cancer	3	Rate	1996	366.9906886247964	400.27505365250886	333.41758078597775
2	DALYs (Disability-Adjusted Life Years)	6	China	1	Male	22	All ages	441	Colon and rectum cancer	1	Number	1999	2371780.4648169773	2666645.1738375505	2067288.1215793355
2	DALYs (Disability-Adjusted Life Years)	6	China	2	Female	22	All ages	441	Colon and rectum cancer	1	Number	1999	1666283.0881955144	1901842.962757804	1475434.886021473
2	DALYs (Disability-Adjusted Life Years)	6	China	3	Both	22	All ages	441	Colon and rectum cancer	1	Number	1999	4038063.553012488	4421923.503390319	3676493.679968525
2	DALYs (Disability-Adjusted Life Years)	6	China	1	Male	22	All ages	441	Colon and rectum cancer	3	Rate	1999	366.7518495456015	412.34720670584625	319.6677573577116
2	DALYs (Disability-Adjusted Life Years)	6	China	2	Female	22	All ages	441	Colon and rectum cancer	3	Rate	1999	274.3052670443642	313.0833802920484	242.88763613089242
2	DALYs (Disability-Adjusted Life Years)	6	China	3	Both	22	All ages	441	Colon and rectum cancer	3	Rate	1999	321.9749122780953	352.58197732980125	293.14514607273617
2	DALYs (Disability-Adjusted Life Years)	6	China	1	Male	27	Age-standardized	441	Colon and rectum cancer	3	Rate	1999	427.95324371795436	478.6678777541283	373.7938149520418
2	DALYs (Disability-Adjusted Life Years)	6	China	2	Female	27	Age-standardized	441	Colon and rectum cancer	3	Rate	1999	294.4398292005128	335.3273181183007	261.26833713755497
2	DALYs (Disability-Adjusted Life Years)	6	China	3	Both	27	Age-standardized	441	Colon and rectum cancer	3	Rate	1999	357.5501921425825	390.5515347788801	326.232310309841
2	DALYs (Disability-Adjusted Life Years)	71	Australia	1	Male	22	All ages	441	Colon and rectum cancer	1	Number	1999	63038.30359035871	67383.09125599122	58878.0290538579
2	DALYs (Disability-Adjusted Life Years)	71	Australia	2	Female	22	All ages	441	Colon and rectum cancer	1	Number	1999	51654.43223077849	56704.82073853014	46270.21792459477
2	DALYs (Disability-Adjusted Life Years)	71	Australia	3	Both	22	All ages	441	Colon and rectum cancer	1	Number	1999	114692.73582113707	124124.8491879375	105644.47302429067
2	DALYs (Disability-Adjusted Life Years)	71	Australia	1	Male	22	All ages	441	Colon and rectum cancer	3	Rate	1999	682.4028991700284	729.4361397624875	637.367052020652
2	DALYs (Disability-Adjusted Life Years)	71	Australia	2	Female	22	All ages	441	Colon and rectum cancer	3	Rate	1999	547.5183311908477	601.0506258693667	490.4476035807773
2	DALYs (Disability-Adjusted Life Years)	71	Australia	3	Both	22	All ages	441	Colon and rectum cancer	3	Rate	1999	614.2505493180124	664.7653511082683	565.7915047800551
2	DALYs (Disability-Adjusted Life Years)	71	Australia	1	Male	27	Age-standardized	441	Colon and rectum cancer	3	Rate	1999	572.7476059438129	613.310137814258	534.9060724883593
2	DALYs (Disability-Adjusted Life Years)	71	Australia	2	Female	27	Age-standardized	441	Colon and rectum cancer	3	Rate	1999	398.41502244270765	435.68591449905364	358.80904523168266
2	DALYs (Disability-Adjusted Life Years)	71	Australia	3	Both	27	Age-standardized	441	Colon and rectum cancer	3	Rate	1999	480.4007589356939	519.3393486144242	443.9038044700174
2	DALYs (Disability-Adjusted Life Years)	68	Republic of Korea	1	Male	22	All ages	441	Colon and rectum cancer	1	Number	2021	147828.77667182664	178868.58426424998	119924.03635643458
2	DALYs (Disability-Adjusted Life Years)	68	Republic of Korea	2	Female	22	All ages	441	Colon and rectum cancer	1	Number	2021	97078.23309675844	124252.3744318664	74653.1737359578
2	DALYs (Disability-Adjusted Life Years)	68	Republic of Korea	3	Both	22	All ages	441	Colon and rectum cancer	1	Number	2021	244907.00976858527	286793.1766916525	204210.06164914754
2	DALYs (Disability-Adjusted Life Years)	68	Republic of Korea	1	Male	22	All ages	441	Colon and rectum cancer	3	Rate	2021	571.1490979156903	691.0740442287162	463.3367516491108
2	DALYs (Disability-Adjusted Life Years)	68	Republic of Korea	2	Female	22	All ages	441	Colon and rectum cancer	3	Rate	2021	377.91593155534173	483.7021681737823	290.61739996717455
2	DALYs (Disability-Adjusted Life Years)	68	Republic of Korea	3	Both	22	All ages	441	Colon and rectum cancer	3	Rate	2021	474.89767461288386	556.1188829768564	395.98247310834427
2	DALYs (Disability-Adjusted Life Years)	68	Republic of Korea	1	Male	27	Age-standardized	441	Colon and rectum cancer	3	Rate	2021	355.57694744714223	430.3172207085893	285.9047384662663
2	DALYs (Disability-Adjusted Life Years)	68	Republic of Korea	2	Female	27	Age-standardized	441	Colon and rectum cancer	3	Rate	2021	195.25630691275552	248.44792437467783	152.48561474740498
2	DALYs (Disability-Adjusted Life Years)	68	Republic of Korea	3	Both	27	Age-standardized	441	Colon and rectum cancer	3	Rate	2021	267.4331087233424	313.79328420143867	223.3927596235262
2	DALYs (Disability-Adjusted Life Years)	67	Japan	1	Male	22	All ages	441	Colon and rectum cancer	1	Number	1990	422323.74158592767	435384.5535512522	408293.42726853257
2	DALYs (Disability-Adjusted Life Years)	67	Japan	2	Female	22	All ages	441	Colon and rectum cancer	1	Number	1990	329873.1201409261	344730.27595661377	306473.6708975545
2	DALYs (Disability-Adjusted Life Years)	67	Japan	3	Both	22	All ages	441	Colon and rectum cancer	1	Number	1990	752196.8617268539	777195.4031611554	717565.3927326105
2	DALYs (Disability-Adjusted Life Years)	67	Japan	1	Male	22	All ages	441	Colon and rectum cancer	3	Rate	1990	682.7137278895196	703.8273777937994	660.0328145335237
2	DALYs (Disability-Adjusted Life Years)	67	Japan	2	Female	22	All ages	441	Colon and rectum cancer	3	Rate	1990	515.6785589743365	538.9042061510997	479.09905755433647
2	DALYs (Disability-Adjusted Life Years)	67	Japan	3	Both	22	All ages	441	Colon and rectum cancer	3	Rate	1990	597.7961889255226	617.6633720507148	570.273
2	DALYs (Disability-Adjusted Life Years)	67	Japan	1	Male	27	Age-standardized	441	Colon and rectum cancer	3	Rate	1990	561.6048130429391	579.0666157182029	541.8010888080827
2	DALYs (Disability-Adjusted Life Years)	67	Japan	2	Female	27	Age-standardized	441	Colon and rectum cancer	3	Rate	1990	354.6385522707447	370.17309897823407	330.43924026309793
2	DALYs (Disability-Adjusted Life Years)	67	Japan	3	Both	27	Age-standardized	441	Colon and rectum cancer	3	Rate	1990	445.57374519912486	460.6476506610212	424.4289113205605
2	DALYs (Disability-Adjusted Life Years)	67	Japan	1	Male	22	All ages	441	Colon and rectum cancer	1	Number	2009	587429.5882355697	610542.2950493309	557599.9349954132
2	DALYs (Disability-Adjusted Life Years)	67	Japan	2	Female	22	All ages	441	Colon and rectum cancer	1	Number	2009	429300.34075187333	464434.96790496435	367734.2190353698
2	DALYs (Disability-Adjusted Life Years)	67	Japan	3	Both	22	All ages	441	Colon and rectum cancer	1	Number	2009	1016729.9289874427	1071124.9147720695	924405.7414137549
2	DALYs (Disability-Adjusted Life Years)	67	Japan	1	Male	22	All ages	441	Colon and rectum cancer	3	Rate	2009	926.2751204647926	962.7198718306355	879.2389033558785
2	DALYs (Disability-Adjusted Life Years)	67	Japan	2	Female	22	All ages	441	Colon and rectum cancer	3	Rate	2009	644.709637460863	697.4737063048797	552.2515882960247
2	DALYs (Disability-Adjusted Life Years)	67	Japan	3	Both	22	All ages	441	Colon and rectum cancer	3	Rate	2009	782.0599570193201	823.9001144022702	711.0449823370758
2	DALYs (Disability-Adjusted Life Years)	67	Japan	1	Male	27	Age-standardized	441	Colon and rectum cancer	3	Rate	2009	484.9805310203582	502.71573841255605	462.1487515442157
2	DALYs (Disability-Adjusted Life Years)	67	Japan	2	Female	27	Age-standardized	441	Colon and rectum cancer	3	Rate	2009	283.61423713324814	300.5173917473201	255.17492590041053
2	DALYs (Disability-Adjusted Life Years)	67	Japan	3	Both	27	Age-standardized	441	Colon and rectum cancer	3	Rate	2009	376.34420085914167	393.2196924092376	349.88921026861016
2	DALYs (Disability-Adjusted Life Years)	67	Japan	1	Male	22	All ages	441	Colon and rectum cancer	1	Number	1992	463873.84646711365	477557.08324438846	448536.1024047132
2	DALYs (Disability-Adjusted Life Years)	67	Japan	2	Female	22	All ages	441	Colon and rectum cancer	1	Number	1992	354050.8229660363	370415.400980216	328775.6752911843
2	DALYs (Disability-Adjusted Life Years)	67	Japan	3	Both	22	All ages	441	Colon and rectum cancer	1	Number	1992	817924.6694331496	846379.9283297512	780697.3041310697
2	DALYs (Disability-Adjusted Life Years)	67	Japan	1	Male	22	All ages	441	Colon and rectum cancer	3	Rate	1992	745.7171138029436	767.7140940482074	721.0603707647856
2	DALYs (Disability-Adjusted Life Years)	67	Japan	2	Female	22	All ages	441	Colon and rectum cancer	3	Rate	1992	549.8738251728445	575.2895353655568	510.61917235958754
2	DALYs (Disability-Adjusted Life Years)	67	Japan	3	Both	22	All ages	441	Colon and rectum cancer	3	Rate	1992	646.1072072248913	668.5850081075635	616.7000137185041
2	DALYs (Disability-Adjusted Life Years)	67	Japan	1	Male	27	Age-standardized	441	Colon and rectum cancer	3	Rate	1992	581.1690226609762	598.2250239081213	560.8733343102826
2	DALYs (Disability-Adjusted Life Years)	67	Japan	2	Female	27	Age-standardized	441	Colon and rectum cancer	3	Rate	1992	360.12822507067864	375.86174896492315	335.9643783753767
2	DALYs (Disability-Adjusted Life Years)	67	Japan	3	Both	27	Age-standardized	441	Colon and rectum cancer	3	Rate	1992	457.64156416750427	473.7657325354361	436.5059552497097
2	DALYs (Disability-Adjusted Life Years)	67	Japan	1	Male	22	All ages	441	Colon and rectum cancer	1	Number	2012	634451.4877381044	661033.1390803726	600493.7574774725
2	DALYs (Disability-Adjusted Life Years)	67	Japan	2	Female	22	All ages	441	Colon and rectum cancer	1	Number	2012	467498.9942255082	508927.50517911825	392476.3169450347
2	DALYs (Disability-Adjusted Life Years)	67	Japan	3	Both	22	All ages	441	Colon and rectum cancer	1	Number	2012	1101950.4819636121	1167858.647270524	992958.6458911868
2	DALYs (Disability-Adjusted Life Years)	67	Japan	1	Male	22	All ages	441	Colon and rectum cancer	3	Rate	2012	1002.9825967839296	1045.0046177033278	949.2999856845048
2	DALYs (Disability-Adjusted Life Years)	67	Japan	2	Female	22	All ages	441	Colon and rectum cancer	3	Rate	2012	702.8604484005102	765.1460621560215	590.0677509939259
2	DALYs (Disability-Adjusted Life Years)	67	Japan	3	Both	22	All ages	441	Colon and rectum cancer	3	Rate	2012	849.1549223222432	899.9432689019053	765.1666164875587
2	DALYs (Disability-Adjusted Life Years)	67	Japan	1	Male	27	Age-standardized	441	Colon and rectum cancer	3	Rate	2012	497.66597396220726	516.4199631110838	472.7273293320051
2	DALYs (Disability-Adjusted Life Years)	67	Japan	2	Female	27	Age-standardized	441	Colon and rectum cancer	3	Rate	2012	291.4831276822974	309.5721458736882	260.10650498676057
2	DALYs (Disability-Adjusted Life Years)	67	Japan	3	Both	27	Age-standardized	441	Colon and rectum cancer	3	Rate	2012	387.3852834540798	405.6651320134107	359.12628740865836
2	DALYs (Disability-Adjusted Life Years)	71	Australia	1	Male	22	All ages	441	Colon and rectum cancer	1	Number	2000	64833.581946201935	69512.7535858511	60573.28218516454
2	DALYs (Disability-Adjusted Life Years)	71	Australia	2	Female	22	All ages	441	Colon and rectum cancer	1	Number	2000	51823.2	56783.560260732054	46280.688437540535
2	DALYs (Disability-Adjusted Life Years)	71	Australia	3	Both	22	All ages	441	Colon and rectum cancer	1	Number	2000	116656.73603510193	125884.151821164	107489.22557566228
2	DALYs (Disability-Adjusted Life Years)	71	Australia	1	Male	22	All ages	441	Colon and rectum cancer	3	Rate	2000	694.1345674347916	744.23167273951	648.5220739861935
2	DALYs (Disability-Adjusted Life Years)	71	Australia	2	Female	22	All ages	441	Colon and rectum cancer	3	Rate	2000	542.9284454163878	594.8964442550284	484.8624648181355
2	DALYs (Disability-Adjusted Life Years)	71	Australia	3	Both	22	All ages	441	Colon and rectum cancer	3	Rate	2000	617.711183468361	666.5714389434321	569.1681337669266
2	DALYs (Disability-Adjusted Life Years)	71	Australia	1	Male	27	Age-standardized	441	Colon and rectum cancer	3	Rate	2000	573.4679760284126	615.3303919228358	534.4319319829015
2	DALYs (Disability-Adjusted Life Years)	71	Australia	2	Female	27	Age-standardized	441	Colon and rectum cancer	3	Rate	2000	389.5009334032997	426.0802669851289	350.70240966444305
2	DALYs (Disability-Adjusted Life Years)	71	Australia	3	Both	27	Age-standardized	441	Colon and rectum cancer	3	Rate	2000	476.1947457867668	513.546931870223	439.64146775604985
2	DALYs (Disability-Adjusted Life Years)	71	Australia	1	Male	22	All ages	441	Colon and rectum cancer	1	Number	2001	64533.92780363468	69159.63014400555	60111.34546667826
2	DALYs (Disability-Adjusted Life Years)	71	Australia	2	Female	22	All ages	441	Colon and rectum cancer	1	Number	2001	52081.831864191074	56996.14288164767	46362.30303906658
2	DALYs (Disability-Adjusted Life Years)	71	Australia	3	Both	22	All ages	441	Colon and rectum cancer	1	Number	2001	116615.75966782593	125702.5901795978	107414.6779045014
2	DALYs (Disability-Adjusted Life Years)	71	Australia	1	Male	22	All ages	441	Colon and rectum cancer	3	Rate	2001	683.1250477190283	732.0905026284981	636.3097232409086
2	DALYs (Disability-Adjusted Life Years)	71	Australia	2	Female	22	All ages	441	Colon and rectum cancer	3	Rate	2001	539.20131582683	590.0789995055552	479.98724139760435
2	DALYs (Disability-Adjusted Life Years)	71	Australia	3	Both	22	All ages	441	Colon and rectum cancer	3	Rate	2001	610.3639341143031	657.9241749907786	562.2057050793336
2	DALYs (Disability-Adjusted Life Years)	71	Australia	1	Male	27	Age-standardized	441	Colon and rectum cancer	3	Rate	2001	554.5938272631563	594.5362664381973	516.867523521721
2	DALYs (Disability-Adjusted Life Years)	71	Australia	2	Female	27	Age-standardized	441	Colon and rectum cancer	3	Rate	2001	380.38416177617205	415.8820339536508	342.77466312685374
2	DALYs (Disability-Adjusted Life Years)	71	Australia	3	Both	27	Age-standardized	441	Colon and rectum cancer	3	Rate	2001	462.69913648173184	498.4583266744285	426.6948354864464
2	DALYs (Disability-Adjusted Life Years)	67	Japan	1	Male	22	All ages	441	Colon and rectum cancer	1	Number	1991	440896.890009907	455292.567536538	426511.2485435236
2	DALYs (Disability-Adjusted Life Years)	67	Japan	2	Female	22	All ages	441	Colon and rectum cancer	1	Number	1991	342796.0938573984	358545.93980626087	318244.8724988699
2	DALYs (Disability-Adjusted Life Years)	67	Japan	3	Both	22	All ages	441	Colon and rectum cancer	1	Number	1991	783692.9838673061	810623.6725769346	747944.3746573008
2	DALYs (Disability-Adjusted Life Years)	67	Japan	1	Male	22	All ages	441	Colon and rectum cancer	3	Rate	1991	710.6912625240211	733.8959674518778	687.5027349394136
2	DALYs (Disability-Adjusted Life Years)	67	Japan	2	Female	22	All ages	441	Colon and rectum cancer	3	Rate	1991	534.0960931354349	558.6352618701627	495.84387368410046
2	DALYs (Disability-Adjusted Life Years)	67	Japan	3	Both	22	All ages	441	Colon and rectum cancer	3	Rate	1991	620.8933334327382	642.2296034118913	592.570924536779
2	DALYs (Disability-Adjusted Life Years)	67	Japan	1	Male	27	Age-standardized	441	Colon and rectum cancer	3	Rate	1991	569.7157454381398	588.5891543335374	549.973589490126
2	DALYs (Disability-Adjusted Life Years)	67	Japan	2	Female	27	Age-standardized	441	Colon and rectum cancer	3	Rate	1991	359.1140257146266	374.9550389374916	334.783844990067
2	DALYs (Disability-Adjusted Life Years)	67	Japan	3	Both	27	Age-standardized	441	Colon and rectum cancer	3	Rate	1991	451.6496322954026	467.3787053853964	430.4029603960363
2	DALYs (Disability-Adjusted Life Years)	67	Japan	1	Male	22	All ages	441	Colon and rectum cancer	1	Number	1993	476551.312733056	490405.29239423235	462091.2827774073
2	DALYs (Disability-Adjusted Life Years)	67	Japan	2	Female	22	All ages	441	Colon and rectum cancer	1	Number	1993	359525.7692080338	376789.21873700566	333288.27167072264
2	DALYs (Disability-Adjusted Life Years)	67	Japan	3	Both	22	All ages	441	Colon and rectum cancer	1	Number	1993	836077.0819410898	866389.6740871586	797041.5290870016
2	DALYs (Disability-Adjusted Life Years)	67	Japan	1	Male	22	All ages	441	Colon and rectum cancer	3	Rate	1993	764.1473817888816	786.3621611895089	740.960804108867
2	DALYs (Disability-Adjusted Life Years)	67	Japan	2	Female	22	All ages	441	Colon and rectum cancer	3	Rate	1993	556.6528399203672	583.3817952002427	516.0293887871701
2	DALYs (Disability-Adjusted Life Years)	67	Japan	3	Both	22	All ages	441	Colon and rectum cancer	3	Rate	1993	658.5831968056283	682.4606170462072	627.8346453347114
2	DALYs (Disability-Adjusted Life Years)	67	Japan	1	Male	27	Age-standardized	441	Colon and rectum cancer	3	Rate	1993	579.9677333203639	597.3166273947755	561.2152904108846
2	DALYs (Disability-Adjusted Life Years)	67	Japan	2	Female	27	Age-standardized	441	Colon and rectum cancer	3	Rate	1993	355.47236439942424	371.59029585680963	331.4411803589156
2	DALYs (Disability-Adjusted Life Years)	67	Japan	3	Both	27	Age-standardized	441	Colon and rectum cancer	3	Rate	1993	454.860197126564	471.25308652321144	433.4897280371708
2	DALYs (Disability-Adjusted Life Years)	67	Japan	1	Male	22	All ages	441	Colon and rectum cancer	1	Number	1994	483053.63581974094	497408.01534652367	467563.8260150744
2	DALYs (Disability-Adjusted Life Years)	67	Japan	2	Female	22	All ages	441	Colon and rectum cancer	1	Number	1994	360802.41882432986	379323.6238377817	331030.1307340368
2	DALYs (Disability-Adjusted Life Years)	67	Japan	3	Both	22	All ages	441	Colon and rectum cancer	1	Number	1994	843856.054644071	875573.1277763511	802212.9685676509
2	DALYs (Disability-Adjusted Life Years)	67	Japan	1	Male	22	All ages	441	Colon and rectum cancer	3	Rate	1994	772.6635615926587	795.6239643040368	747.8869928545801
2	DALYs (Disability-Adjusted Life Years)	67	Japan	2	Female	22	All ages	441	Colon and rectum cancer	3	Rate	1994	556.9272531391798	585.5162073556742	510.97135661325194
2	DALYs (Disability-Adjusted Life Years)	67	Japan	3	Both	22	All ages	441	Colon and rectum cancer	3	Rate	1994	662.8749160428247	687.7896536618518	630.1629896013962
2	DALYs (Disability-Adjusted Life Years)	67	Japan	1	Male	27	Age-standardized	441	Colon and rectum cancer	3	Rate	1994	572.6067232882898	590.2242049171299	553.6428526883038
2	DALYs (Disability-Adjusted Life Years)	67	Japan	2	Female	27	Age-standardized	441	Colon and rectum cancer	3	Rate	1994	347.06558243942106	363.4121503350626	321.452300713646
2	DALYs (Disability-Adjusted Life Years)	67	Japan	3	Both	27	Age-standardized	441	Colon and rectum cancer	3	Rate	1994	447.42583631027026	464.1931935563266	425.6148489860362
2	DALYs (Disability-Adjusted Life Years)	67	Japan	1	Male	22	All ages	441	Colon and rectum cancer	1	Number	1996	501506.55964782543	516847.4250748402	483371.1317126115
2	DALYs (Disability-Adjusted Life Years)	67	Japan	2	Female	22	All ages	441	Colon and rectum cancer	1	Number	1996	368366.0992818236	388498.47518674145	337003.72038552683
2	DALYs (Disability-Adjusted Life Years)	67	Japan	3	Both	22	All ages	441	Colon and rectum cancer	1	Number	1996	869872.6589296502	905396.0903377787	822859.9654837677
2	DALYs (Disability-Adjusted Life Years)	67	Japan	1	Male	22	All ages	441	Colon and rectum cancer	3	Rate	1996	798.779066908019	823.2133677872685	769.8937015516004
2	DALYs (Disability-Adjusted Life Years)	67	Japan	2	Female	22	All ages	441	Colon and rectum cancer	3	Rate	1996	565.4200527491021	596.3220523313557	517.2806665122738
2	DALYs (Disability-Adjusted Life Years)	67	Japan	3	Both	22	All ages	441	Colon and rectum cancer	3	Rate	1996	679.9426304317174	707.7097928383666	643.1947983012001
2	DALYs (Disability-Adjusted Life Years)	67	Japan	1	Male	27	Age-standardized	441	Colon and rectum cancer	3	Rate	1996	565.0208233813119	583.0781861411027	543.8806876053384
2	DALYs (Disability-Adjusted Life Years)	67	Japan	2	Female	27	Age-standardized	441	Colon and rectum cancer	3	Rate	1996	337.8903633804039	354.5602346781948	313.7700472277377
2	DALYs (Disability-Adjusted Life Years)	67	Japan	3	Both	27	Age-standardized	441	Colon and rectum cancer	3	Rate	1996	438.8576370956064	456.2807428024627	416.27883790419355
2	DALYs (Disability-Adjusted Life Years)	67	Japan	1	Male	22	All ages	441	Colon and rectum cancer	1	Number	1997	507336.2014802725	524158.60669455235	489096.72287612985
2	DALYs (Disability-Adjusted Life Years)	67	Japan	2	Female	22	All ages	441	Colon and rectum cancer	1	Number	1997	373042.9464102496	394506.3118966239	338958.6174554421
2	DALYs (Disability-Adjusted Life Years)	67	Japan	3	Both	22	All ages	441	Colon and rectum cancer	1	Number	1997	880379.1478905225	918770.026175932	829891.8481438133
2	DALYs (Disability-Adjusted Life Years)	67	Japan	1	Male	22	All ages	441	Colon and rectum cancer	3	Rate	1997	806.4850200914426	833.2266911325391	777.4907038459235
2	DALYs (Disability-Adjusted Life Years)	67	Japan	2	Female	22	All ages	441	Colon and rectum cancer	3	Rate	1997	571.0371635095217	603.8923065021693	518.8624240759709
2	DALYs (Disability-Adjusted Life Years)	67	Japan	3	Both	22	All ages	441	Colon and rectum cancer	3	Rate	1997	686.5392765622596	716.4773388934817	647.1681552371575
2	DALYs (Disability-Adjusted Life Years)	67	Japan	1	Male	27	Age-standardized	441	Colon and rectum cancer	3	Rate	1997	555.3380546110311	574.4817822199608	533.942338499083
2	DALYs (Disability-Adjusted Life Years)	67	Japan	2	Female	27	Age-standardized	441	Colon and rectum cancer	3	Rate	1997	334.0601843228225	351.17240317206284	308.6054087617138
2	DALYs (Disability-Adjusted Life Years)	67	Japan	3	Both	27	Age-standardized	441	Colon and rectum cancer	3	Rate	1997	432.5915188140297	451.11295518464306	408.64526967070555
2	DALYs (Disability-Adjusted Life Years)	67	Japan	1	Male	22	All ages	441	Colon and rectum cancer	1	Number	1998	523827.1048310625	541622.2313014056	504234.16302231717
2	DALYs (Disability-Adjusted Life Years)	67	Japan	2	Female	22	All ages	441	Colon and rectum cancer	1	Number	1998	380656.60419798444	403462.9610265028	343242.4420570141
2	DALYs (Disability-Adjusted Life Years)	67	Japan	3	Both	22	All ages	441	Colon and rectum cancer	1	Number	1998	904483.7090290468	944512.6202549251	851190.0796257681
2	DALYs (Disability-Adjusted Life Years)	67	Japan	1	Male	22	All ages	441	Colon and rectum cancer	3	Rate	1998	831.2577065398596	859.4966729486229	800.1657990724917
2	DALYs (Disability-Adjusted Life Years)	67	Japan	2	Female	22	All ages	441	Colon and rectum cancer	3	Rate	1998	581.1889297178668	616.0098206987481	524.0647484710561
2	DALYs (Disability-Adjusted Life Years)	67	Japan	3	Both	22	All ages	441	Colon and rectum cancer	3	Rate	1998	703.8104559608095	734.9583539055309	662.3408161699576
2	DALYs (Disability-Adjusted Life Years)	67	Japan	1	Male	27	Age-standardized	441	Colon and rectum cancer	3	Rate	1998	557.7511720114034	576.4635177556785	535.6105190222847
2	DALYs (Disability-Adjusted Life Years)	67	Japan	2	Female	27	Age-standardized	441	Colon and rectum cancer	3	Rate	1998	330.90221925105163	348.6400639761815	304.19530026796593
2	DALYs (Disability-Adjusted Life Years)	67	Japan	3	Both	27	Age-standardized	441	Colon and rectum cancer	3	Rate	1998	432.36407420303607	450.5415234436429	408.3877798591711
2	DALYs (Disability-Adjusted Life Years)	67	Japan	1	Male	22	All ages	441	Colon and rectum cancer	1	Number	2015	655291.0774593629	684488.3512619659	615193.3753557724
2	DALYs (Disability-Adjusted Life Years)	67	Japan	2	Female	22	All ages	441	Colon and rectum cancer	1	Number	2015	486267.5798815164	535656.8641116532	401587.8442915244
2	DALYs (Disability-Adjusted Life Years)	67	Japan	3	Both	22	All ages	441	Colon and rectum cancer	1	Number	2015	1141558.6573408789	1215145.8014654769	1016700.9860154032
2	DALYs (Disability-Adjusted Life Years)	67	Japan	1	Male	22	All ages	441	Colon and rectum cancer	3	Rate	2015	1039.7653980792488	1086.0933827908598	976.1414535087716
2	DALYs (Disability-Adjusted Life Years)	67	Japan	2	Female	22	All ages	441	Colon and rectum cancer	3	Rate	2015	733.4464695622295	807.941249085934	605.7224433643978
2	DALYs (Disability-Adjusted Life Years)	67	Japan	3	Both	22	All ages	441	Colon and rectum cancer	3	Rate	2015	882.7260638812252	939.6283436437697	786.1781378979503
2	DALYs (Disability-Adjusted Life Years)	67	Japan	1	Male	27	Age-standardized	441	Colon and rectum cancer	3	Rate	2015	490.87944472001493	511.1268277792994	465.9553297802838
2	DALYs (Disability-Adjusted Life Years)	67	Japan	2	Female	27	Age-standardized	441	Colon and rectum cancer	3	Rate	2015	287.0845641124034	306.43002200720696	254.55220151343028
2	DALYs (Disability-Adjusted Life Years)	67	Japan	3	Both	27	Age-standardized	441	Colon and rectum cancer	3	Rate	2015	382.6791534815637	402.19123086827034	353.20699855639
2	DALYs (Disability-Adjusted Life Years)	6	China	1	Male	22	All ages	441	Colon and rectum cancer	1	Number	2000	2472434.113904484	2784904.2840809934	2139756.4217628166
2	DALYs (Disability-Adjusted Life Years)	6	China	2	Female	22	All ages	441	Colon and rectum cancer	1	Number	2000	1681274.985617773	1897031.7239826974	1491213.7916011934
2	DALYs (Disability-Adjusted Life Years)	6	China	3	Both	22	All ages	441	Colon and rectum cancer	1	Number	2000	4153709.099522256	4542116.468675122	3804279.798716581
2	DALYs (Disability-Adjusted Life Years)	6	China	1	Male	22	All ages	441	Colon and rectum cancer	3	Rate	2000	381.16269317804506	429.334642809574	329.87545183808305
2	DALYs (Disability-Adjusted Life Years)	6	China	2	Female	22	All ages	441	Colon and rectum cancer	3	Rate	2000	275.4247114175467	310.76975485713336	244.28908520441067
2	DALYs (Disability-Adjusted Life Years)	6	China	3	Both	22	All ages	441	Colon and rectum cancer	3	Rate	2000	329.89880634340057	360.7471696708296	302.1461865823151
2	DALYs (Disability-Adjusted Life Years)	6	China	1	Male	27	Age-standardized	441	Colon and rectum cancer	3	Rate	2000	436.34829815742455	488.4051189073952	381.03642378517765
2	DALYs (Disability-Adjusted Life Years)	6	China	2	Female	27	Age-standardized	441	Colon and rectum cancer	3	Rate	2000	290.2047332970091	328.0352990106506	258.0359084482759
2	DALYs (Disability-Adjusted Life Years)	6	China	3	Both	27	Age-standardized	441	Colon and rectum cancer	3	Rate	2000	359.39509229005984	390.8067023519847	328.48308337875653
2	DALYs (Disability-Adjusted Life Years)	6	China	1	Male	22	All ages	441	Colon and rectum cancer	1	Number	2001	2536182.924518178	2863749.624494989	2218744.349250595
2	DALYs (Disability-Adjusted Life Years)	6	China	2	Female	22	All ages	441	Colon and rectum cancer	1	Number	2001	1689835.0365314442	1930036.1866257847	1472646.1487227036
2	DALYs (Disability-Adjusted Life Years)	6	China	3	Both	22	All ages	441	Colon and rectum cancer	1	Number	2001	4226017.961049622	4640461.513319096	3866246.819841448
2	DALYs (Disability-Adjusted Life Years)	6	China	1	Male	22	All ages	441	Colon and rectum cancer	3	Rate	2001	389.5527467757039	439.86635250761844	340.7948012298225
2	DALYs (Disability-Adjusted Life Years)	6	China	2	Female	22	All ages	441	Colon and rectum cancer	3	Rate	2001	275.30618153838736	314.43950520845283	239.92199190889218
2	DALYs (Disability-Adjusted Life Years)	6	China	3	Both	22	All ages	441	Colon and rectum cancer	3	Rate	2001	334.11165360796394	366.8778230497807	305.6679195733761
2	DALYs (Disability-Adjusted Life Years)	6	China	1	Male	27	Age-standardized	441	Colon and rectum cancer	3	Rate	2001	437.1098445841207	489.2742588238491	385.5949899304627
2	DALYs (Disability-Adjusted Life Years)	6	China	2	Female	27	Age-standardized	441	Colon and rectum cancer	3	Rate	2001	284.639475951658	324.7384166037439	247.33028883508695
2	DALYs (Disability-Adjusted Life Years)	6	China	3	Both	27	Age-standardized	441	Colon and rectum cancer	3	Rate	2001	356.9458124816117	391.6900087883499	328.1393202737366
2	DALYs (Disability-Adjusted Life Years)	71	Australia	1	Male	22	All ages	441	Colon and rectum cancer	1	Number	2002	63432.681172936296	68105.47895980004	59127.75841172534
2	DALYs (Disability-Adjusted Life Years)	71	Australia	2	Female	22	All ages	441	Colon and rectum cancer	1	Number	2002	52189.772842774735	57469.68590358579	46374.205006809534
2	DALYs (Disability-Adjusted Life Years)	71	Australia	3	Both	22	All ages	441	Colon and rectum cancer	1	Number	2002	115622.4540157113	124916.67081862365	106324.66299143774
2	DALYs (Disability-Adjusted Life Years)	71	Australia	1	Male	22	All ages	441	Colon and rectum cancer	3	Rate	2002	663.6926090434642	712.5838319485944	618.6504420360615
2	DALYs (Disability-Adjusted Life Years)	71	Australia	2	Female	22	All ages	441	Colon and rectum cancer	3	Rate	2002	533.840655280193	587.8480229055924	474.3541625198036
2	DALYs (Disability-Adjusted Life Years)	71	Australia	3	Both	22	All ages	441	Colon and rectum cancer	3	Rate	2002	598.0320567045991	646.1043765443853	549.9412499803258
2	DALYs (Disability-Adjusted Life Years)	71	Australia	1	Male	27	Age-standardized	441	Colon and rectum cancer	3	Rate	2002	529.5874677399656	568.8828591681719	493.80276094943764
2	DALYs (Disability-Adjusted Life Years)	71	Australia	2	Female	27	Age-standardized	441	Colon and rectum cancer	3	Rate	2002	371.30449883045924	407.53846106743987	333.9704225708346
2	DALYs (Disability-Adjusted Life Years)	71	Australia	3	Both	27	Age-standardized	441	Colon and rectum cancer	3	Rate	2002	446.2742965161439	482.1429232618351	411.60141241325624
2	DALYs (Disability-Adjusted Life Years)	6	China	1	Male	22	All ages	441	Colon and rectum cancer	1	Number	2002	2606951.0972198057	2927090.9113837713	2260960.339029215
2	DALYs (Disability-Adjusted Life Years)	6	China	2	Female	22	All ages	441	Colon and rectum cancer	1	Number	2002	1695891.603965005	1929255.0488553955	1499775.2924679166
2	DALYs (Disability-Adjusted Life Years)	6	China	3	Both	22	All ages	441	Colon and rectum cancer	1	Number	2002	4302842.70118481	4707646.359266842	3898534.1863492243
2	DALYs (Disability-Adjusted Life Years)	6	China	1	Male	22	All ages	441	Colon and rectum cancer	3	Rate	2002	398.74239330806427	447.70891048940916	345.82188278122067
2	DALYs (Disability-Adjusted Life Years)	6	China	2	Female	22	All ages	441	Colon and rectum cancer	3	Rate	2002	274.6385361487412	312.43021737735256	242.87878418197423
2	DALYs (Disability-Adjusted Life Years)	6	China	3	Both	22	All ages	441	Colon and rectum cancer	3	Rate	2002	338.46196897312683	370.3038587833776	306.6590271723092
2	DALYs (Disability-Adjusted Life Years)	6	China	1	Male	27	Age-standardized	441	Colon and rectum cancer	3	Rate	2002	436.71947750990165	486.495939448572	381.5610053500154
2	DALYs (Disability-Adjusted Life Years)	6	China	2	Female	27	Age-standardized	441	Colon and rectum cancer	3	Rate	2002	277.7755218228709	315.7068736294203	245.46714730303586
2	DALYs (Disability-Adjusted Life Years)	6	China	3	Both	27	Age-standardized	441	Colon and rectum cancer	3	Rate	2002	353.3281330438141	386.16838832079145	321.8958179073017
2	DALYs (Disability-Adjusted Life Years)	6	China	1	Male	22	All ages	441	Colon and rectum cancer	1	Number	2003	2691708.622150706	3008258.999085547	2386012.9501738064
2	DALYs (Disability-Adjusted Life Years)	6	China	2	Female	22	All ages	441	Colon and rectum cancer	1	Number	2003	1711118.0529815722	1954801.129246763	1513612.8237823278
2	DALYs (Disability-Adjusted Life Years)	6	China	3	Both	22	All ages	441	Colon and rectum cancer	1	Number	2003	4402826.675132279	4810916.714966856	4012336.583851031
2	DALYs (Disability-Adjusted Life Years)	6	China	1	Male	22	All ages	441	Colon and rectum cancer	3	Rate	2003	409.87485891735304	458.07697114402265	363.325626436512
2	DALYs (Disability-Adjusted Life Years)	6	China	2	Female	22	All ages	441	Colon and rectum cancer	3	Rate	2003	275.3640867975077	314.57912964440465	243.5802791394581
2	DALYs (Disability-Adjusted Life Years)	6	China	3	Both	22	All ages	441	Colon and rectum cancer	3	Rate	2003	344.4776515720986	376.40666193859334	313.92566314918435
2	DALYs (Disability-Adjusted Life Years)	6	China	1	Male	27	Age-standardized	441	Colon and rectum cancer	3	Rate	2003	441.3492382383637	490.3559865248581	394.0709648324129
2	DALYs (Disability-Adjusted Life Years)	6	China	2	Female	27	Age-standardized	441	Colon and rectum cancer	3	Rate	2003	272.89952403301925	311.16785515149775	240.82068340609942
2	DALYs (Disability-Adjusted Life Years)	6	China	3	Both	27	Age-standardized	441	Colon and rectum cancer	3	Rate	2003	352.5357826720389	384.96613493814743	322.36683540116104
2	DALYs (Disability-Adjusted Life Years)	67	Japan	1	Male	22	All ages	441	Colon and rectum cancer	1	Number	1999	534191.9368400617	552323.6493237304	514026.6863372852
2	DALYs (Disability-Adjusted Life Years)	67	Japan	2	Female	22	All ages	441	Colon and rectum cancer	1	Number	1999	388229.32962092693	411662.70260399336	350235.5419126591
2	DALYs (Disability-Adjusted Life Years)	67	Japan	3	Both	22	All ages	441	Colon and rectum cancer	1	Number	1999	922421.2664609902	963962.7784301662	865703.6425637284
2	DALYs (Disability-Adjusted Life Years)	67	Japan	1	Male	22	All ages	441	Colon and rectum cancer	3	Rate	1999	846.4944375100855	875.2264207196204	814.5400570629156
2	DALYs (Disability-Adjusted Life Years)	67	Japan	2	Female	22	All ages	441	Colon and rectum cancer	3	Rate	1999	591.348099826488	627.0416436388331	533.4762378823308
2	DALYs (Disability-Adjusted Life Years)	67	Japan	3	Both	22	All ages	441	Colon and rectum cancer	3	Rate	1999	716.3994884743604	748.6627493154183	672.349683656469
2	DALYs (Disability-Adjusted Life Years)	67	Japan	1	Male	27	Age-standardized	441	Colon and rectum cancer	3	Rate	1999	554.3949109092487	573.3622547515713	532.5378569592357
2	DALYs (Disability-Adjusted Life Years)	67	Japan	2	Female	27	Age-standardized	441	Colon and rectum cancer	3	Rate	1999	328.2152765055886	345.7040316621222	302.0726116358173
2	DALYs (Disability-Adjusted Life Years)	67	Japan	3	Both	27	Age-standardized	441	Colon and rectum cancer	3	Rate	1999	429.6072641866044	448.36997514174055	404.93042397880384
2	DALYs (Disability-Adjusted Life Years)	67	Japan	1	Male	22	All ages	441	Colon and rectum cancer	1	Number	2001	543553.3454407016	564067.4480775818	520558.11113062396
2	DALYs (Disability-Adjusted Life Years)	67	Japan	2	Female	22	All ages	441	Colon and rectum cancer	1	Number	2001	394592.64142058	420502.2809199892	351379.8824383283
2	DALYs (Disability-Adjusted Life Years)	67	Japan	3	Both	22	All ages	441	Colon and rectum cancer	1	Number	2001	938145.9868612826	983620.3539834712	874772.269933312
2	DALYs (Disability-Adjusted Life Years)	67	Japan	1	Male	22	All ages	441	Colon and rectum cancer	3	Rate	2001	859.1608881864319	891.5862513815757	822.8137548284675
2	DALYs (Disability-Adjusted Life Years)	67	Japan	2	Female	22	All ages	441	Colon and rectum cancer	3	Rate	2001	598.3784544132203	637.6690250185026	532.8486365290335
2	DALYs (Disability-Adjusted Life Years)	67	Japan	3	Both	22	All ages	441	Colon and rectum cancer	3	Rate	2001	726.0671219666694	761.2614769200277	677.0197744294629
2	DALYs (Disability-Adjusted Life Years)	67	Japan	1	Male	27	Age-standardized	441	Colon and rectum cancer	3	Rate	2001	537.9559308153197	558.3659360394198	514.9317523439765
2	DALYs (Disability-Adjusted Life Years)	67	Japan	2	Female	27	Age-standardized	441	Colon and rectum cancer	3	Rate	2001	317.98404204879404	336.24951456220293	290.3816836623391
2	DALYs (Disability-Adjusted Life Years)	67	Japan	3	Both	27	Age-standardized	441	Colon and rectum cancer	3	Rate	2001	417.19491885293314	436.1198418354387	391.62614852908206
2	DALYs (Disability-Adjusted Life Years)	67	Japan	1	Male	22	All ages	441	Colon and rectum cancer	1	Number	2002	545495.26945834	565362.7265132279	521567.8246304601
2	DALYs (Disability-Adjusted Life Years)	67	Japan	2	Female	22	All ages	441	Colon and rectum cancer	1	Number	2002	399487.96548609494	427964.570798348	353202.3734618772
2	DALYs (Disability-Adjusted Life Years)	67	Japan	3	Both	22	All ages	441	Colon and rectum cancer	1	Number	2002	944983.2349444359	992852.7109449375	877879.1480961175
2	DALYs (Disability-Adjusted Life Years)	67	Japan	1	Male	22	All ages	441	Colon and rectum cancer	3	Rate	2002	861.3105725484767	892.6803236152805	823.5302977079855
2	DALYs (Disability-Adjusted Life Years)	67	Japan	2	Female	22	All ages	441	Colon and rectum cancer	3	Rate	2002	604.5685845090355	647.6639026478503	534.5218815521772
2	DALYs (Disability-Adjusted Life Years)	67	Japan	3	Both	22	All ages	441	Colon and rectum cancer	3	Rate	2002	730.2166260268887	767.2067925845176	678.363304106447
2	DALYs (Disability-Adjusted Life Years)	67	Japan	1	Male	27	Age-standardized	441	Colon and rectum cancer	3	Rate	2002	525.8330686828683	545.2360801654615	502.3655006899252
2	DALYs (Disability-Adjusted Life Years)	67	Japan	2	Female	27	Age-standardized	441	Colon and rectum cancer	3	Rate	2002	313.39129123571837	332.01621649179754	284.9814058886949
2	DALYs (Disability-Adjusted Life Years)	67	Japan	3	Both	27	Age-standardized	441	Colon and rectum cancer	3	Rate	2002	409.2622792565873	428.4228373680886	382.6148943514505
2	DALYs (Disability-Adjusted Life Years)	71	Australia	1	Male	22	All ages	441	Colon and rectum cancer	1	Number	2003	63438.271858444336	68000.80573044665	58917.2645591507
2	DALYs (Disability-Adjusted Life Years)	71	Australia	2	Female	22	All ages	441	Colon and rectum cancer	1	Number	2003	51646.39002826473	57036.8620872686	45772.8474714483
2	DALYs (Disability-Adjusted Life Years)	71	Australia	3	Both	22	All ages	441	Colon and rectum cancer	1	Number	2003	115084.66188670904	124451.18320019719	105425.33943988482
2	DALYs (Disability-Adjusted Life Years)	71	Australia	1	Male	22	All ages	441	Colon and rectum cancer	3	Rate	2003	655.8021590253303	702.9680019184324	609.0656029844927
2	DALYs (Disability-Adjusted Life Years)	71	Australia	2	Female	22	All ages	441	Colon and rectum cancer	3	Rate	2003	521.8008698366262	576.2626242337661	462.4584915311539
2	DALYs (Disability-Adjusted Life Years)	71	Australia	3	Both	22	All ages	441	Colon and rectum cancer	3	Rate	2003	588.0335169775185	635.8924443056217	538.6785007928473
2	DALYs (Disability-Adjusted Life Years)	71	Australia	1	Male	27	Age-standardized	441	Colon and rectum cancer	3	Rate	2003	515.3194578399325	553.1093437358136	479.19429840585644
2	DALYs (Disability-Adjusted Life Years)	71	Australia	2	Female	27	Age-standardized	441	Colon and rectum cancer	3	Rate	2003	358.42499232003667	394.99725374732236	321.80804774584027
2	DALYs (Disability-Adjusted Life Years)	71	Australia	3	Both	27	Age-standardized	441	Colon and rectum cancer	3	Rate	2003	433.0240946351068	468.4325272736874	398.123339220319
2	DALYs (Disability-Adjusted Life Years)	71	Australia	1	Male	22	All ages	441	Colon and rectum cancer	1	Number	2004	62590.96617568734	67280.53910411091	57714.6480305544
2	DALYs (Disability-Adjusted Life Years)	71	Australia	2	Female	22	All ages	441	Colon and rectum cancer	1	Number	2004	50846.76200421092	56050.98852217129	44882.48060218591
2	DALYs (Disability-Adjusted Life Years)	71	Australia	3	Both	22	All ages	441	Colon and rectum cancer	1	Number	2004	113437.72817989827	122685.39803895424	103073.65107072651
2	DALYs (Disability-Adjusted Life Years)	71	Australia	1	Male	22	All ages	441	Colon and rectum cancer	3	Rate	2004	638.9828161459154	686.8580399907534	589.201135319093
2	DALYs (Disability-Adjusted Life Years)	71	Australia	2	Female	22	All ages	441	Colon and rectum cancer	3	Rate	2004	507.2601910818516	559.1788744724513	447.7590074389956
2	DALYs (Disability-Adjusted Life Years)	71	Australia	3	Both	22	All ages	441	Colon and rectum cancer	3	Rate	2004	572.3625192251403	619.0226534011142	520.0694296258695
2	DALYs (Disability-Adjusted Life Years)	71	Australia	1	Male	27	Age-standardized	441	Colon and rectum cancer	3	Rate	2004	494.56233941915974	532.1605333097565	456.8588518117223
2	DALYs (Disability-Adjusted Life Years)	71	Australia	2	Female	27	Age-standardized	441	Colon and rectum cancer	3	Rate	2004	343.30589680266445	377.5938824065102	307.3942074778157
2	DALYs (Disability-Adjusted Life Years)	71	Australia	3	Both	27	Age-standardized	441	Colon and rectum cancer	3	Rate	2004	415.51072581938257	449.162714382209	379.40698816894485
2	DALYs (Disability-Adjusted Life Years)	6	China	1	Male	22	All ages	441	Colon and rectum cancer	1	Number	2005	2846013.6860180474	3180126.361224519	2524752.8811359536
2	DALYs (Disability-Adjusted Life Years)	6	China	2	Female	22	All ages	441	Colon and rectum cancer	1	Number	2005	1743634.6523313911	1935488.1450796109	1559747.9739921284
2	DALYs (Disability-Adjusted Life Years)	6	China	3	Both	22	All ages	441	Colon and rectum cancer	1	Number	2005	4589648.338349443	5000921.690443063	4258949.963912171
2	DALYs (Disability-Adjusted Life Years)	6	China	1	Male	22	All ages	441	Colon and rectum cancer	3	Rate	2005	429.206663335797	479.59411832523676	380.7573959266368
2	DALYs (Disability-Adjusted Life Years)	6	China	2	Female	22	All ages	441	Colon and rectum cancer	3	Rate	2005	276.8697283735193	307.33392243715844	247.67057554914368
2	DALYs (Disability-Adjusted Life Years)	6	China	3	Both	22	All ages	441	Colon and rectum cancer	3	Rate	2005	355.0012340411586	386.8125051360559	329.4222958816271
2	DALYs (Disability-Adjusted Life Years)	6	China	1	Male	27	Age-standardized	441	Colon and rectum cancer	3	Rate	2005	443.4189966907248	493.1865628856041	395.20229579340685
2	DALYs (Disability-Adjusted Life Years)	6	China	2	Female	27	Age-standardized	441	Colon and rectum cancer	3	Rate	2005	263.4289707118106	291.53175621448463	236.51371004799782
2	DALYs (Disability-Adjusted Life Years)	6	China	3	Both	27	Age-standardized	441	Colon and rectum cancer	3	Rate	2005	348.60650299194236	378.4390259973131	323.90178443716223
2	DALYs (Disability-Adjusted Life Years)	6	China	1	Male	22	All ages	441	Colon and rectum cancer	1	Number	2004	2794822.6229549493	3133424.61311117	2482514.6769052045
2	DALYs (Disability-Adjusted Life Years)	6	China	2	Female	22	All ages	441	Colon and rectum cancer	1	Number	2004	1739523.669272433	1967895.7063940314	1537616.090692551
2	DALYs (Disability-Adjusted Life Years)	6	China	3	Both	22	All ages	441	Colon and rectum cancer	1	Number	2004	4534346.292227379	4945148.7783727795	4168476.6581866546
2	DALYs (Disability-Adjusted Life Years)	6	China	1	Male	22	All ages	441	Colon and rectum cancer	3	Rate	2004	423.6095402328344	474.93123492426525	376.27321758015813
2	DALYs (Disability-Adjusted Life Years)	6	China	2	Female	22	All ages	441	Colon and rectum cancer	3	Rate	2004	278.1183784096869	314.63093742818006	245.8370077475962
2	DALYs (Disability-Adjusted Life Years)	6	China	3	Both	22	All ages	441	Colon and rectum cancer	3	Rate	2004	352.80551520153944	384.76897220945216	324.3381648018568
2	DALYs (Disability-Adjusted Life Years)	6	China	1	Male	27	Age-standardized	441	Colon and rectum cancer	3	Rate	2004	446.7329906575822	497.9872327879427	397.21893570930456
2	DALYs (Disability-Adjusted Life Years)	6	China	2	Female	27	Age-standardized	441	Colon and rectum cancer	3	Rate	2004	270.02863547623406	305.5614274707164	238.67664815417146
2	DALYs (Disability-Adjusted Life Years)	6	China	3	Both	27	Age-standardized	441	Colon and rectum cancer	3	Rate	2004	353.6072440198269	384.72878454782057	325.1225173085268
2	DALYs (Disability-Adjusted Life Years)	6	China	1	Male	22	All ages	441	Colon and rectum cancer	1	Number	2006	2841111.796689605	3181595.929553779	2530112.7797646956
2	DALYs (Disability-Adjusted Life Years)	6	China	2	Female	22	All ages	441	Colon and rectum cancer	1	Number	2006	1722893.2891040135	1911656.5807893337	1556799.2911361256
2	DALYs (Disability-Adjusted Life Years)	6	China	3	Both	22	All ages	441	Colon and rectum cancer	1	Number	2006	4564005.085793615	4956728.669157359	4208972.671084457
2	DALYs (Disability-Adjusted Life Years)	6	China	1	Male	22	All ages	441	Colon and rectum cancer	3	Rate	2006	426.0300531667629	477.0862887557953	379.3951661237012
2	DALYs (Disability-Adjusted Life Years)	6	China	2	Female	22	All ages	441	Colon and rectum cancer	3	Rate	2006	271.55848338354537	301.3109198999177	245.379128879979
2	DALYs (Disability-Adjusted Life Years)	6	China	3	Both	22	All ages	441	Colon and rectum cancer	3	Rate	2006	350.7192828856362	380.89798140600766	323.4369482809845
2	DALYs (Disability-Adjusted Life Years)	6	China	1	Male	27	Age-standardized	441	Colon and rectum cancer	3	Rate	2006	427.5193360240631	477.63378334333123	380.6307689645061
2	DALYs (Disability-Adjusted Life Years)	6	China	2	Female	27	Age-standardized	441	Colon and rectum cancer	3	Rate	2006	251.76151353961114	279.12907666928646	227.25357081285983
2	DALYs (Disability-Adjusted Life Years)	6	China	3	Both	27	Age-standardized	441	Colon and rectum cancer	3	Rate	2006	335.180684656796	363.2352981985496	308.62273576708793
2	DALYs (Disability-Adjusted Life Years)	71	Australia	1	Male	22	All ages	441	Colon and rectum cancer	1	Number	2006	63049.91105479052	68004.35531345947	58020.06108803267
2	DALYs (Disability-Adjusted Life Years)	71	Australia	2	Female	22	All ages	441	Colon and rectum cancer	1	Number	2006	50278.742250100186	55812.90516339768	44179.75532862291
2	DALYs (Disability-Adjusted Life Years)	71	Australia	3	Both	22	All ages	441	Colon and rectum cancer	1	Number	2006	113328.65330489061	123460.32052654747	102916.82871256807
2	DALYs (Disability-Adjusted Life Years)	71	Australia	1	Male	22	All ages	441	Colon and rectum cancer	3	Rate	2006	626.4818986665849	675.7106698747064	576.5038748364768
2	DALYs (Disability-Adjusted Life Years)	71	Australia	2	Female	22	All ages	441	Colon and rectum cancer	3	Rate	2006	488.4016915680878	542.1598885178624	429.1568617256063
2	DALYs (Disability-Adjusted Life Years)	71	Australia	3	Both	22	All ages	441	Colon and rectum cancer	3	Rate	2006	556.660384535777	606.4262434525233	505.51841723745736
2	DALYs (Disability-Adjusted Life Years)	71	Australia	1	Male	27	Age-standardized	441	Colon and rectum cancer	3	Rate	2006	471.8024221728612	508.75011188144674	434.72580023565047
2	DALYs (Disability-Adjusted Life Years)	71	Australia	2	Female	27	Age-standardized	441	Colon and rectum cancer	3	Rate	2006	322.6233355280973	355.82662332212385	287.94151802528046
2	DALYs (Disability-Adjusted Life Years)	71	Australia	3	Both	27	Age-standardized	441	Colon and rectum cancer	3	Rate	2006	393.8195160656458	427.7749696503848	359.4941170849815
2	DALYs (Disability-Adjusted Life Years)	6	China	1	Male	22	All ages	441	Colon and rectum cancer	1	Number	2007	2908702.2769424557	3285592.7180963764	2585078.4725165027
2	DALYs (Disability-Adjusted Life Years)	6	China	2	Female	22	All ages	441	Colon and rectum cancer	1	Number	2007	1724427.5517194315	1946616.9153110571	1548848.1755877933
2	DALYs (Disability-Adjusted Life Years)	6	China	3	Both	22	All ages	441	Colon and rectum cancer	1	Number	2007	4633129.828661891	5064005.31028647	4262635.055278172
2	DALYs (Disability-Adjusted Life Years)	6	China	1	Male	22	All ages	441	Colon and rectum cancer	3	Rate	2007	433.4227063085299	489.5827596359741	385.1998592154946
2	DALYs (Disability-Adjusted Life Years)	6	China	2	Female	22	All ages	441	Colon and rectum cancer	3	Rate	2007	269.67775328238116	304.4252428576235	242.21945175461352
2	DALYs (Disability-Adjusted Life Years)	6	China	3	Both	22	All ages	441	Colon and rectum cancer	3	Rate	2007	353.52813560089936	386.4058254839973	325.25775870061443
2	DALYs (Disability-Adjusted Life Years)	6	China	1	Male	27	Age-standardized	441	Colon and rectum cancer	3	Rate	2007	425.01954531459114	481.96251351993334	378.65084997516595
2	DALYs (Disability-Adjusted Life Years)	6	China	2	Female	27	Age-standardized	441	Colon and rectum cancer	3	Rate	2007	244.155898800299	275.2822729195501	218.97343381632558
2	DALYs (Disability-Adjusted Life Years)	6	China	3	Both	27	Age-standardized	441	Colon and rectum cancer	3	Rate	2007	329.93879478959934	360.48361865347425	303.4335835627058
2	DALYs (Disability-Adjusted Life Years)	67	Japan	1	Male	22	All ages	441	Colon and rectum cancer	1	Number	2003	557982.4698172865	579390.7434154078	532872.6783498467
2	DALYs (Disability-Adjusted Life Years)	67	Japan	2	Female	22	All ages	441	Colon and rectum cancer	1	Number	2003	408619.0053733988	437229.33861495345	360243.6514055071
2	DALYs (Disability-Adjusted Life Years)	67	Japan	3	Both	22	All ages	441	Colon and rectum cancer	1	Number	2003	966601.4751906857	1015158.5354421181	895564.7162768791
2	DALYs (Disability-Adjusted Life Years)	67	Japan	1	Male	22	All ages	441	Colon and rectum cancer	3	Rate	2003	880.3492495187528	914.1258618947109	840.732617689492
2	DALYs (Disability-Adjusted Life Years)	67	Japan	2	Female	22	All ages	441	Colon and rectum cancer	3	Rate	2003	617.2932811949247	660.5143899796733	544.2135159683467
2	DALYs (Disability-Adjusted Life Years)	67	Japan	3	Both	22	All ages	441	Colon and rectum cancer	3	Rate	2003	745.9655769943447	783.4390305295397	691.1436279170457
2	DALYs (Disability-Adjusted Life Years)	67	Japan	1	Male	27	Age-standardized	441	Colon and rectum cancer	3	Rate	2003	524.878143554974	545.0794974541406	501.31661656014563
2	DALYs (Disability-Adjusted Life Years)	67	Japan	2	Female	27	Age-standardized	441	Colon and rectum cancer	3	Rate	2003	312.9107380000236	331.00849174531146	285.10061302785624
2	DALYs (Disability-Adjusted Life Years)	67	Japan	3	Both	27	Age-standardized	441	Colon and rectum cancer	3	Rate	2003	408.70996762364405	427.81177697540295	382.32908588028204
2	DALYs (Disability-Adjusted Life Years)	71	Australia	1	Male	22	All ages	441	Colon and rectum cancer	1	Number	2005	63352.81562790782	68250.92112348008	58371.52033181824
2	DALYs (Disability-Adjusted Life Years)	71	Australia	2	Female	22	All ages	441	Colon and rectum cancer	1	Number	2005	50148.1512059001	55459.39695097151	44416.29191685832
2	DALYs (Disability-Adjusted Life Years)	71	Australia	3	Both	22	All ages	441	Colon and rectum cancer	1	Number	2005	113500.96683380785	123172.55231838707	103049.54510000994
2	DALYs (Disability-Adjusted Life Years)	71	Australia	1	Male	22	All ages	441	Colon and rectum cancer	3	Rate	2005	638.301299408666	687.6513886111302	588.1130444949949
2	DALYs (Disability-Adjusted Life Years)	71	Australia	2	Female	22	All ages	441	Colon and rectum cancer	3	Rate	2005	493.78994859405793	546.0877841146762	437.35048999740116
2	DALYs (Disability-Adjusted Life Years)	71	Australia	3	Both	22	All ages	441	Colon and rectum cancer	3	Rate	2005	565.2160748485034	613.3789736999287	513.169720233628
2	DALYs (Disability-Adjusted Life Years)	71	Australia	1	Male	27	Age-standardized	441	Colon and rectum cancer	3	Rate	2005	487.25138745796335	524.4977955493221	448.82604866717185
2	DALYs (Disability-Adjusted Life Years)	71	Australia	2	Female	27	Age-standardized	441	Colon and rectum cancer	3	Rate	2005	329.71103054068067	362.96763358530774	294.35516526214445
2	DALYs (Disability-Adjusted Life Years)	71	Australia	3	Both	27	Age-standardized	441	Colon and rectum cancer	3	Rate	2005	405.026371456678	438.9867488706777	369.1532018109685
2	DALYs (Disability-Adjusted Life Years)	6	China	1	Male	22	All ages	441	Colon and rectum cancer	1	Number	2008	3023273.437230789	3422948.049278721	2685714.5786743546
2	DALYs (Disability-Adjusted Life Years)	6	China	2	Female	22	All ages	441	Colon and rectum cancer	1	Number	2008	1746899.7468770577	1964221.6728711633	1541354.4596606689
2	DALYs (Disability-Adjusted Life Years)	6	China	3	Both	22	All ages	441	Colon and rectum cancer	1	Number	2008	4770173.184107851	5206668.204207171	4368519.574428315
2	DALYs (Disability-Adjusted Life Years)	6	China	1	Male	22	All ages	441	Colon and rectum cancer	3	Rate	2008	447.5949666415652	506.7667049448435	397.6194519644918
2	DALYs (Disability-Adjusted Life Years)	6	China	2	Female	22	All ages	441	Colon and rectum cancer	3	Rate	2008	271.0578824825498	304.77866192756335	239.16442642890755
2	DALYs (Disability-Adjusted Life Years)	6	China	3	Both	22	All ages	441	Colon and rectum cancer	3	Rate	2008	361.3977588057943	394.4674851879169	330.9676866151158
2	DALYs (Disability-Adjusted Life Years)	6	China	1	Male	27	Age-standardized	441	Colon and rectum cancer	3	Rate	2008	429.6273969018592	483.1027536307231	382.9390207638546
2	DALYs (Disability-Adjusted Life Years)	6	China	2	Female	27	Age-standardized	441	Colon and rectum cancer	3	Rate	2008	240.64232659657117	269.9505105943406	212.32827830965735
2	DALYs (Disability-Adjusted Life Years)	6	China	3	Both	27	Age-standardized	441	Colon and rectum cancer	3	Rate	2008	330.59378151355094	360.4085724787477	303.1087039571024
2	DALYs (Disability-Adjusted Life Years)	71	Australia	1	Male	22	All ages	441	Colon and rectum cancer	1	Number	2008	64076.412675966836	69414.87913125298	58932.78167245963
2	DALYs (Disability-Adjusted Life Years)	71	Australia	2	Female	22	All ages	441	Colon and rectum cancer	1	Number	2008	51940.65599180139	57973.566411351756	45084.82207811785
2	DALYs (Disability-Adjusted Life Years)	71	Australia	3	Both	22	All ages	441	Colon and rectum cancer	1	Number	2008	116017.06866776822	126668.0385230631	105408.34425279463
2	DALYs (Disability-Adjusted Life Years)	71	Australia	1	Male	22	All ages	441	Colon and rectum cancer	3	Rate	2008	618.296932925492	669.8097642152355	568.6641407520034
2	DALYs (Disability-Adjusted Life Years)	71	Australia	2	Female	22	All ages	441	Colon and rectum cancer	3	Rate	2008	490.54546644763263	547.5223528439514	425.79660679506645
2	DALYs (Disability-Adjusted Life Years)	71	Australia	3	Both	22	All ages	441	Colon and rectum cancer	3	Rate	2008	553.7353168006167	604.5710966973227	503.10116923739923
2	DALYs (Disability-Adjusted Life Years)	71	Australia	1	Male	27	Age-standardized	441	Colon and rectum cancer	3	Rate	2008	454.3949763564027	491.62253689185997	417.8003225715408
2	DALYs (Disability-Adjusted Life Years)	71	Australia	2	Female	27	Age-standardized	441	Colon and rectum cancer	3	Rate	2008	318.36111323760224	352.6249736576845	280.4917165795002
2	DALYs (Disability-Adjusted Life Years)	71	Australia	3	Both	27	Age-standardized	441	Colon and rectum cancer	3	Rate	2008	383.28467429171235	417.0057971847318	348.87072165555446
2	DALYs (Disability-Adjusted Life Years)	6	China	1	Male	22	All ages	441	Colon and rectum cancer	1	Number	2009	3145709.6216027685	3582563.179878732	2785018.2800303428
2	DALYs (Disability-Adjusted Life Years)	6	China	2	Female	22	All ages	441	Colon and rectum cancer	1	Number	2009	1772387.5083025077	1994842.4978485517	1563125.1017841166
2	DALYs (Disability-Adjusted Life Years)	6	China	3	Both	22	All ages	441	Colon and rectum cancer	1	Number	2009	4918097.12990527	5347913.561842062	4474239.00525349
2	DALYs (Disability-Adjusted Life Years)	6	China	1	Male	22	All ages	441	Colon and rectum cancer	3	Rate	2009	462.8435448050086	527.1199319465878	409.77327475611753
2	DALYs (Disability-Adjusted Life Years)	6	China	2	Female	22	All ages	441	Colon and rectum cancer	3	Rate	2009	272.96299592558444	307.2229871073319	240.73477656030335
2	DALYs (Disability-Adjusted Life Years)	6	China	3	Both	22	All ages	441	Colon and rectum cancer	3	Rate	2009	370.07033983297083	402.4125870133769	336.67150229706505
2	DALYs (Disability-Adjusted Life Years)	6	China	1	Male	27	Age-standardized	441	Colon and rectum cancer	3	Rate	2009	435.0558506559859	492.10172946369084	387.134536370837
2	DALYs (Disability-Adjusted Life Years)	6	China	2	Female	27	Age-standardized	441	Colon and rectum cancer	3	Rate	2009	237.32008129883457	266.71950567915445	209.42823644199458
2	DALYs (Disability-Adjusted Life Years)	6	China	3	Both	27	Age-standardized	441	Colon and rectum cancer	3	Rate	2009	331.63987574114776	359.1744972095778	302.3914398219793
2	DALYs (Disability-Adjusted Life Years)	71	Australia	1	Male	22	All ages	441	Colon and rectum cancer	1	Number	2009	64174.13241093892	69527.66413881032	58821.48028393093
2	DALYs (Disability-Adjusted Life Years)	71	Australia	2	Female	22	All ages	441	Colon and rectum cancer	1	Number	2009	51519.352061672864	57778.28582791816	45127.58077031944
2	DALYs (Disability-Adjusted Life Years)	71	Australia	3	Both	22	All ages	441	Colon and rectum cancer	1	Number	2009	115693.48447261183	126245.24408157238	104964.95605023975
2	DALYs (Disability-Adjusted Life Years)	71	Australia	1	Male	22	All ages	441	Colon and rectum cancer	3	Rate	2009	610.0923579155357	660.9874564907365	559.2056215533431
2	DALYs (Disability-Adjusted Life Years)	71	Australia	2	Female	22	All ages	441	Colon and rectum cancer	3	Rate	2009	479.6104284167395	537.8768814083735	420.1073476381206
2	DALYs (Disability-Adjusted Life Years)	71	Australia	3	Both	22	All ages	441	Colon and rectum cancer	3	Rate	2009	544.1666007761764	593.7970115533258	493.70475437621934
2	DALYs (Disability-Adjusted Life Years)	71	Australia	1	Male	27	Age-standardized	441	Colon and rectum cancer	3	Rate	2009	443.91358943018525	480.64248072442354	407.1351151285491
2	DALYs (Disability-Adjusted Life Years)	71	Australia	2	Female	27	Age-standardized	441	Colon and rectum cancer	3	Rate	2009	308.4763422694118	343.36954238144006	274.18460509528376
2	DALYs (Disability-Adjusted Life Years)	71	Australia	3	Both	27	Age-standardized	441	Colon and rectum cancer	3	Rate	2009	373.07311705313214	405.38398166249385	339.601724460523
2	DALYs (Disability-Adjusted Life Years)	6	China	1	Male	22	All ages	441	Colon and rectum cancer	1	Number	2010	3283676.7916803183	3757560.488802706	2866841.6148693985
2	DALYs (Disability-Adjusted Life Years)	6	China	2	Female	22	All ages	441	Colon and rectum cancer	1	Number	2010	1801260.775102247	2054676.7723313887	1571549.3458193631
2	DALYs (Disability-Adjusted Life Years)	6	China	3	Both	22	All ages	441	Colon and rectum cancer	1	Number	2010	5084937.5667825695	5659709.230912795	4601004.4993411945
2	DALYs (Disability-Adjusted Life Years)	6	China	1	Male	22	All ages	441	Colon and rectum cancer	3	Rate	2010	480.5506312940503	549.9012782240695	419.5487665948289
2	DALYs (Disability-Adjusted Life Years)	6	China	2	Female	22	All ages	441	Colon and rectum cancer	3	Rate	2010	275.5813071180248	314.3523239115593	240.43693667664124
2	DALYs (Disability-Adjusted Life Years)	6	China	3	Both	22	All ages	441	Colon and rectum cancer	3	Rate	2010	380.34213956942693	423.3337951459361	344.14501111667556
2	DALYs (Disability-Adjusted Life Years)	6	China	1	Male	27	Age-standardized	441	Colon and rectum cancer	3	Rate	2010	441.6813524178564	500.8724593292913	387.47705433769755
2	DALYs (Disability-Adjusted Life Years)	6	China	2	Female	27	Age-standardized	441	Colon and rectum cancer	3	Rate	2010	234.20950660720473	266.42229058939785	204.52812979530108
2	DALYs (Disability-Adjusted Life Years)	6	China	3	Both	27	Age-standardized	441	Colon and rectum cancer	3	Rate	2010	333.3642384386132	369.6352541236179	302.64600418245567
2	DALYs (Disability-Adjusted Life Years)	71	Australia	1	Male	22	All ages	441	Colon and rectum cancer	1	Number	2010	64875.75151294293	70360.98756589722	59615.39193509016
2	DALYs (Disability-Adjusted Life Years)	71	Australia	2	Female	22	All ages	441	Colon and rectum cancer	1	Number	2010	51424.20621174765	57736.06818425285	45001.33139759779
2	DALYs (Disability-Adjusted Life Years)	71	Australia	3	Both	22	All ages	441	Colon and rectum cancer	1	Number	2010	116299.95772469052	127563.0830862475	105393.03793778192
2	DALYs (Disability-Adjusted Life Years)	71	Australia	1	Male	22	All ages	441	Colon and rectum cancer	3	Rate	2010	607.6451929247886	659.0215121489358	558.3751322935772
2	DALYs (Disability-Adjusted Life Years)	71	Australia	2	Female	22	All ages	441	Colon and rectum cancer	3	Rate	2010	471.7742965645471	529.6803774057308	412.84976528660076
2	DALYs (Disability-Adjusted Life Years)	71	Australia	3	Both	22	All ages	441	Colon and rectum cancer	3	Rate	2010	539.0057706713055	591.2060438652543	488.4563739182172
2	DALYs (Disability-Adjusted Life Years)	71	Australia	1	Male	27	Age-standardized	441	Colon and rectum cancer	3	Rate	2010	437.379460777946	474.71110919341515	401.9648856346342
2	DALYs (Disability-Adjusted Life Years)	71	Australia	2	Female	27	Age-standardized	441	Colon and rectum cancer	3	Rate	2010	300.4723568930361	334.68808977348607	267.57452038683834
2	DALYs (Disability-Adjusted Life Years)	71	Australia	3	Both	27	Age-standardized	441	Colon and rectum cancer	3	Rate	2010	365.7684472133747	399.80984343045156	333.29091947386024
2	DALYs (Disability-Adjusted Life Years)	6	China	1	Male	22	All ages	441	Colon and rectum cancer	1	Number	2011	3399778.1220728676	3895001.8554750523	2925558.2538819173
2	DALYs (Disability-Adjusted Life Years)	6	China	2	Female	22	All ages	441	Colon and rectum cancer	1	Number	2011	1827352.5263826167	2091558.6593096477	1553286.5699219261
2	DALYs (Disability-Adjusted Life Years)	6	China	3	Both	22	All ages	441	Colon and rectum cancer	1	Number	2011	5227130.648455482	5753798.0497920215	4709465.153764372
2	DALYs (Disability-Adjusted Life Years)	6	China	1	Male	22	All ages	441	Colon and rectum cancer	3	Rate	2011	495.24634322695135	567.3856812191307	426.16664238343236
2	DALYs (Disability-Adjusted Life Years)	6	China	2	Female	22	All ages	441	Colon and rectum cancer	3	Rate	2011	277.9747879572342	318.16552440083547	236.2841863718534
2	DALYs (Disability-Adjusted Life Years)	6	China	3	Both	22	All ages	441	Colon and rectum cancer	3	Rate	2011	388.9630898565487	428.15365032419453	350.44238244192354
2	DALYs (Disability-Adjusted Life Years)	6	China	1	Male	27	Age-standardized	441	Colon and rectum cancer	3	Rate	2011	443.4523391971576	505.0130640691595	384.7795842043645
2	DALYs (Disability-Adjusted Life Years)	6	China	2	Female	27	Age-standardized	441	Colon and rectum cancer	3	Rate	2011	230.39676167371215	263.8713934384074	196.57130642104815
2	DALYs (Disability-Adjusted Life Years)	6	China	3	Both	27	Age-standardized	441	Colon and rectum cancer	3	Rate	2011	332.4207121983331	365.6841372597521	300.74986451457715
2	DALYs (Disability-Adjusted Life Years)	71	Australia	1	Male	22	All ages	441	Colon and rectum cancer	1	Number	2007	63736.31010149601	68895.39000836042	58574.902024668176
2	DALYs (Disability-Adjusted Life Years)	71	Australia	2	Female	22	All ages	441	Colon and rectum cancer	1	Number	2007	51601.623687020896	57292.19546430541	44989.43671011115
2	DALYs (Disability-Adjusted Life Years)	71	Australia	3	Both	22	All ages	441	Colon and rectum cancer	1	Number	2007	115337.93378851695	125575.38700569687	104702.77185575949
2	DALYs (Disability-Adjusted Life Years)	71	Australia	1	Male	22	All ages	441	Colon and rectum cancer	3	Rate	2007	624.1858301285396	674.7100065240295	573.6388533748396
2	DALYs (Disability-Adjusted Life Years)	71	Australia	2	Female	22	All ages	441	Colon and rectum cancer	3	Rate	2007	494.30701892500616	548.8186674008231	430.9669493769017
2	DALYs (Disability-Adjusted Life Years)	71	Australia	3	Both	22	All ages	441	Colon and rectum cancer	3	Rate	2007	558.5291969793665	608.1045304077405	507.02794098374494
2	DALYs (Disability-Adjusted Life Years)	71	Australia	1	Male	27	Age-standardized	441	Colon and rectum cancer	3	Rate	2007	463.6761111901511	500.6247757305797	425.9321672030296
2	DALYs (Disability-Adjusted Life Years)	71	Australia	2	Female	27	Age-standardized	441	Colon and rectum cancer	3	Rate	2007	324.3201362468618	358.77244640819225	288.4738833371265
2	DALYs (Disability-Adjusted Life Years)	71	Australia	3	Both	27	Age-standardized	441	Colon and rectum cancer	3	Rate	2007	390.70272025021217	424.5907750180419	356.04754410440177
2	DALYs (Disability-Adjusted Life Years)	71	Australia	1	Male	22	All ages	441	Colon and rectum cancer	1	Number	2011	64174.21537641307	69585.90704425883	58861.41773593251
2	DALYs (Disability-Adjusted Life Years)	71	Australia	2	Female	22	All ages	441	Colon and rectum cancer	1	Number	2011	51641.52246142242	57940.30105161266	45263.671819967254
2	DALYs (Disability-Adjusted Life Years)	71	Australia	3	Both	22	All ages	441	Colon and rectum cancer	1	Number	2011	115815.73783783539	127363.14597028018	104800.34538282364
2	DALYs (Disability-Adjusted Life Years)	71	Australia	1	Male	22	All ages	441	Colon and rectum cancer	3	Rate	2011	592.1663680148872	642.1026513175822	543.1426274937419
2	DALYs (Disability-Adjusted Life Years)	71	Australia	2	Female	22	All ages	441	Colon and rectum cancer	3	Rate	2011	466.7554880475286	523.6862161677896	409.1100770108874
2	DALYs (Disability-Adjusted Life Years)	71	Australia	3	Both	22	All ages	441	Colon and rectum cancer	3	Rate	2011	528.8117420704488	581.536916773966	478.51573755091914
2	DALYs (Disability-Adjusted Life Years)	71	Australia	1	Male	27	Age-standardized	441	Colon and rectum cancer	3	Rate	2011	421.28956565774985	456.3482097547868	386.8157603928621
2	DALYs (Disability-Adjusted Life Years)	71	Australia	2	Female	27	Age-standardized	441	Colon and rectum cancer	3	Rate	2011	294.18977195296554	327.922503540042	262.72640566649943
2	DALYs (Disability-Adjusted Life Years)	71	Australia	3	Both	27	Age-standardized	441	Colon and rectum cancer	3	Rate	2011	354.88081921504187	389.8752344529215	322.57191179801265
2	DALYs (Disability-Adjusted Life Years)	6	China	1	Male	22	All ages	441	Colon and rectum cancer	1	Number	2012	3510076.141645165	4080671.0287428848	3019700.1636701385
2	DALYs (Disability-Adjusted Life Years)	6	China	2	Female	22	All ages	441	Colon and rectum cancer	1	Number	2012	1824715.2042317118	2098757.282180344	1564601.4872207174
2	DALYs (Disability-Adjusted Life Years)	6	China	3	Both	22	All ages	441	Colon and rectum cancer	1	Number	2012	5334791.345876875	5973833.633492863	4765457.241986989
2	DALYs (Disability-Adjusted Life Years)	6	China	1	Male	22	All ages	441	Colon and rectum cancer	3	Rate	2012	508.7384725062952	591.4385506721044	437.6650496169936
2	DALYs (Disability-Adjusted Life Years)	6	China	2	Female	22	All ages	441	Colon and rectum cancer	3	Rate	2012	275.9560493021069	317.40008889681496	236.61842908105834
2	DALYs (Disability-Adjusted Life Years)	6	China	3	Both	22	All ages	441	Colon and rectum cancer	3	Rate	2012	394.8214433231156	442.1161886998115	352.68571615833906
2	DALYs (Disability-Adjusted Life Years)	6	China	1	Male	27	Age-standardized	441	Colon and rectum cancer	3	Rate	2012	443.4839204434083	512.849764795115	383.0680872607839
2	DALYs (Disability-Adjusted Life Years)	6	China	2	Female	27	Age-standardized	441	Colon and rectum cancer	3	Rate	2012	222.77103783477494	256.3451743810743	191.08824954381342
2	DALYs (Disability-Adjusted Life Years)	6	China	3	Both	27	Age-standardized	441	Colon and rectum cancer	3	Rate	2012	328.5389049154309	367.41109045423383	293.7562434698512
[truncated: 2,610 more rows]
