# Supplementary material for: Temporal Trends, Projections, and Risk Attribution of Colorectal Cancer in Australia, China, Japan, and Korea: GBD 2021 Analysis (1990–2041)
Source: Research Square preprint supplement (doi:10.21203/rs.3.rs-7388179/v1), 2025-09-22
Supplement: Supplementary file 4 [file 52c7ce5e3a0f76bd6f8ffd36.xlsx]

## Sheet: Table S5
Year	Location	Measure	Forecast	Lower_95	Upper_95
2022	China	Prevalence	170.988	169.131	172.845
2023	China	Prevalence	173.356	168.101	178.611
2024	China	Prevalence	175.724	166.173	185.275
2025	China	Prevalence	178.092	163.498	192.685
2026	China	Prevalence	180.46	160.173	200.747
2027	China	Prevalence	182.828	156.262	209.394
2028	China	Prevalence	185.196	151.816	218.575
2029	China	Prevalence	187.564	146.874	228.254
2030	China	Prevalence	189.932	141.467	238.396
2031	China	Prevalence	192.299	135.621	248.978
2032	China	Prevalence	194.667	129.359	259.976
2033	China	Prevalence	197.035	122.7	271.371
2034	China	Prevalence	199.403	115.66	283.146
2035	China	Prevalence	201.771	108.255	295.288
2036	China	Prevalence	204.139	100.497	307.781
2037	China	Prevalence	206.507	92.3982	320.616
2038	China	Prevalence	208.875	83.9696	333.78
2039	China	Prevalence	211.243	75.2208	347.265
2040	China	Prevalence	213.611	66.1608	361.061
2041	China	Prevalence	215.979	56.7979	375.16
2022	Australia	Prevalence	271.226	259.89	282.563
2023	Australia	Prevalence	271.521	255.899	287.143
2024	Australia	Prevalence	271.8	253.148	290.453
2025	Australia	Prevalence	272.065	251.058	293.072
2026	Australia	Prevalence	272.316	249.397	295.234
2027	Australia	Prevalence	272.554	248.044	297.064
2028	Australia	Prevalence	272.78	246.922	298.637
2029	Australia	Prevalence	272.994	245.982	300.005
2030	Australia	Prevalence	273.196	245.188	301.205
2031	Australia	Prevalence	273.389	244.513	302.264
2032	Australia	Prevalence	273.571	243.938	303.204
2033	Australia	Prevalence	273.744	243.446	304.043
2034	Australia	Prevalence	273.908	243.024	304.792
2035	Australia	Prevalence	274.064	242.662	305.465
2036	Australia	Prevalence	274.211	242.352	306.07
2037	Australia	Prevalence	274.351	242.086	306.616
2038	Australia	Prevalence	274.484	241.857	307.11
2039	Australia	Prevalence	274.609	241.662	307.557
2040	Australia	Prevalence	274.728	241.495	307.962
2041	Australia	Prevalence	274.841	241.353	308.33
2022	Republic of Korea	Prevalence	218.702	214.333	223.072
2023	Republic of Korea	Prevalence	219.049	207.658	230.44
2024	Republic of Korea	Prevalence	224.921	206.9	242.942
2025	Republic of Korea	Prevalence	227.105	200.773	253.436
2026	Republic of Korea	Prevalence	229.219	193.262	265.176
2027	Republic of Korea	Prevalence	234.403	188.669	280.137
2028	Republic of Korea	Prevalence	235.977	179.109	292.845
2029	Republic of Korea	Prevalence	239.377	170.727	308.027
2030	Republic of Korea	Prevalence	243.52	162.653	324.386
2031	Republic of Korea	Prevalence	245.297	151.165	339.429
2032	Republic of Korea	Prevalence	249.297	141.495	357.1
2033	Republic of Korea	Prevalence	252.558	130.494	374.621
2034	Republic of Korea	Prevalence	254.902	117.803	392.001
2035	Republic of Korea	Prevalence	258.94	106.449	411.43
2036	Republic of Korea	Prevalence	261.697	93.1813	430.212
2037	Republic of Korea	Prevalence	264.612	79.4984	449.725
2038	Republic of Korea	Prevalence	268.375	66.2824	470.468
2039	Republic of Korea	Prevalence	270.997	51.323	490.672
2040	Republic of Korea	Prevalence	274.296	36.5897	512.002
2041	Republic of Korea	Prevalence	277.711	21.555	533.866
2022	Japan	Prevalence	312.869	306.738	319
2023	Japan	Prevalence	315.311	303.754	326.869
2024	Japan	Prevalence	317.7	301.048	334.352
2025	Japan	Prevalence	320.056	298.745	341.368
2026	Japan	Prevalence	322.394	296.85	347.938
2027	Japan	Prevalence	324.72	295.322	354.117
2028	Japan	Prevalence	327.039	294.111	359.966
2029	Japan	Prevalence	329.354	293.171	365.536
2030	Japan	Prevalence	331.666	292.46	370.873
2031	Japan	Prevalence	333.977	291.942	376.012
2032	Japan	Prevalence	336.287	291.59	380.984
2033	Japan	Prevalence	338.597	291.381	385.813
2034	Japan	Prevalence	340.906	291.295	390.517
2035	Japan	Prevalence	343.215	291.317	395.113
2036	Japan	Prevalence	345.524	291.435	399.614
2037	Japan	Prevalence	347.833	291.637	404.03
2038	Japan	Prevalence	350.142	291.914	408.37
2039	Japan	Prevalence	352.451	292.26	412.642
2040	Japan	Prevalence	354.76	292.668	416.852
2041	Japan	Prevalence	357.069	293.132	421.006
2022	China	Incidence	31.8912	31.4528	32.3296
2023	China	Incidence	32.3381	31.3578	33.3183
2024	China	Incidence	32.7849	31.1447	34.4252
2025	China	Incidence	33.2318	30.8307	35.6329
2026	China	Incidence	33.6787	30.4276	36.9298
2027	China	Incidence	34.1256	29.9437	38.3074
2028	China	Incidence	34.5724	29.3855	39.7594
2029	China	Incidence	35.0193	28.758	41.2806
2030	China	Incidence	35.4662	28.0655	42.8668
2031	China	Incidence	35.913	27.3114	44.5146
2032	China	Incidence	36.3599	26.4988	46.221
2033	China	Incidence	36.8068	25.6303	47.9833
2034	China	Incidence	37.2537	24.7081	49.7992
2035	China	Incidence	37.7005	23.7342	51.6669
2036	China	Incidence	38.1474	22.7105	53.5843
2037	China	Incidence	38.5943	21.6386	55.5499
2038	China	Incidence	39.0411	20.52	57.5623
2039	China	Incidence	39.488	19.356	59.62
2040	China	Incidence	39.9349	18.1479	61.7219
2041	China	Incidence	40.3818	16.8968	63.8667
2022	Australia	Incidence	42.6775	40.828	44.5269
2023	Australia	Incidence	42.6775	40.062	45.293
2024	Australia	Incidence	42.6775	39.4742	45.8808
2025	Australia	Incidence	42.6775	38.9786	46.3763
2026	Australia	Incidence	42.6775	38.542	46.8129
2027	Australia	Incidence	42.6775	38.1473	47.2076
2028	Australia	Incidence	42.6775	37.7843	47.5706
2029	Australia	Incidence	42.6775	37.4465	47.9085
2030	Australia	Incidence	42.6775	37.1292	48.2258
2031	Australia	Incidence	42.6775	36.8291	48.5259
2032	Australia	Incidence	42.6775	36.5436	48.8113
2033	Australia	Incidence	42.6775	36.2709	49.0841
2034	Australia	Incidence	42.6775	36.0092	49.3457
2035	Australia	Incidence	42.6775	35.7575	49.5974
2036	Australia	Incidence	42.6775	35.5147	49.8403
2037	Australia	Incidence	42.6775	35.2797	50.0752
2038	Australia	Incidence	42.6775	35.0521	50.3029
2039	Australia	Incidence	42.6775	34.831	50.5239
2040	Australia	Incidence	42.6775	34.616	50.739
2041	Australia	Incidence	42.6775	34.4066	50.9484
2022	Republic of Korea	Incidence	36.564	35.671	37.4571
2023	Republic of Korea	Incidence	36.9386	34.7076	39.1697
2024	Republic of Korea	Incidence	37.3132	33.8366	40.7898
2025	Republic of Korea	Incidence	37.6878	32.9027	42.4729
2026	Republic of Korea	Incidence	38.0624	31.8831	44.2416
2027	Republic of Korea	Incidence	38.437	30.7742	46.0997
2028	Republic of Korea	Incidence	38.8115	29.5772	48.0459
2029	Republic of Korea	Incidence	39.1861	28.2947	50.0775
2030	Republic of Korea	Incidence	39.5607	26.9298	52.1916
2031	Republic of Korea	Incidence	39.9353	25.4854	54.3851
2032	Republic of Korea	Incidence	40.3099	23.9645	56.6552
2033	Republic of Korea	Incidence	40.6844	22.3697	58.9992
2034	Republic of Korea	Incidence	41.059	20.7035	61.4146
2035	Republic of Korea	Incidence	41.4336	18.9681	63.8991
2036	Republic of Korea	Incidence	41.8082	17.1656	66.4508
2037	Republic of Korea	Incidence	42.1828	15.2979	69.0676
2038	Republic of Korea	Incidence	42.5574	13.3668	71.7479
2039	Republic of Korea	Incidence	42.9319	11.374	74.4899
2040	Republic of Korea	Incidence	43.3065	9.32098	77.292
2041	Republic of Korea	Incidence	43.6811	7.20915	80.153
2022	Japan	Incidence	49.5971	48.5315	50.6628
2023	Japan	Incidence	49.5971	47.3424	51.8518
2024	Japan	Incidence	49.5971	46.5919	52.6024
2025	Japan	Incidence	49.5971	45.9944	53.1998
2026	Japan	Incidence	49.5971	45.4828	53.7114
2027	Japan	Incidence	49.5971	45.0281	54.1661
2028	Japan	Incidence	49.5971	44.6148	54.5794
2029	Japan	Incidence	49.5971	44.2332	54.961
2030	Japan	Incidence	49.5971	43.877	55.3172
2031	Japan	Incidence	49.5971	43.5418	55.6525
2032	Japan	Incidence	49.5971	43.2241	55.9701
2033	Japan	Incidence	49.5971	42.9215	56.2727
2034	Japan	Incidence	49.5971	42.6321	56.5621
2035	Japan	Incidence	49.5971	42.3542	56.84
2036	Japan	Incidence	49.5971	42.0866	57.1076
2037	Japan	Incidence	49.5971	41.8283	57.366
2038	Japan	Incidence	49.5971	41.5782	57.616
2039	Japan	Incidence	49.5971	41.3357	57.8585
2040	Japan	Incidence	49.5971	41.1001	58.0941
2041	Japan	Incidence	49.5971	40.8709	58.3233
2022	China	Deaths	13.6212	13.3554	13.8869
2023	China	Deaths	13.6212	13.1033	14.1391
2024	China	Deaths	13.6212	12.9387	14.3036
2025	China	Deaths	13.6212	12.8067	14.4356
2026	China	Deaths	13.6212	12.6933	14.549
2027	China	Deaths	13.6212	12.5923	14.65
2028	China	Deaths	13.6212	12.5004	14.7419
2029	China	Deaths	13.6212	12.4155	14.8268
2030	China	Deaths	13.6212	12.3362	14.9062
2031	China	Deaths	13.6212	12.2615	14.9809
2032	China	Deaths	13.6212	12.1907	15.0517
2033	China	Deaths	13.6212	12.1232	15.1191
2034	China	Deaths	13.6212	12.0587	15.1837
2035	China	Deaths	13.6212	11.9967	15.2457
2036	China	Deaths	13.6212	11.9369	15.3054
2037	China	Deaths	13.6212	11.8793	15.3631
2038	China	Deaths	13.6212	11.8235	15.4189
2039	China	Deaths	13.6212	11.7693	15.473
2040	China	Deaths	13.6212	11.7167	15.5256
2041	China	Deaths	13.6212	11.6656	15.5768
2022	Australia	Deaths	13.6602	13.0574	14.2631
2023	Australia	Deaths	13.3434	12.4908	14.196
2024	Australia	Deaths	13.0266	11.9824	14.0708
2025	Australia	Deaths	12.7098	11.5041	13.9155
2026	Australia	Deaths	12.393	11.045	13.741
2027	Australia	Deaths	12.0762	10.5995	13.5528
2028	Australia	Deaths	11.7594	10.1644	13.3543
2029	Australia	Deaths	11.4425	9.73743	13.1477
2030	Australia	Deaths	11.1257	9.31719	12.9343
2031	Australia	Deaths	10.8089	8.90255	12.7153
2032	Australia	Deaths	10.4921	8.49269	12.4915
2033	Australia	Deaths	10.1753	8.08697	12.2636
2034	Australia	Deaths	9.85849	7.68489	12.0321
2035	Australia	Deaths	9.54169	7.28603	11.7973
2036	Australia	Deaths	9.22488	6.89005	11.5597
2037	Australia	Deaths	8.90807	6.49667	11.3195
2038	Australia	Deaths	8.59126	6.10565	11.0769
2039	Australia	Deaths	8.27445	5.71678	10.8321
2040	Australia	Deaths	7.95764	5.32988	10.5854
2041	Australia	Deaths	7.64083	4.94481	10.3369
2022	Republic of Korea	Deaths	12.7988	12.4945	13.1031
2023	Republic of Korea	Deaths	12.741	12.0655	13.4166
2024	Republic of Korea	Deaths	12.6833	11.7184	13.6482
2025	Republic of Korea	Deaths	12.6255	11.3881	13.863
2026	Republic of Korea	Deaths	12.5678	11.0606	14.075
2027	Republic of Korea	Deaths	12.5101	10.7305	14.2896
2028	Republic of Korea	Deaths	12.4523	10.3952	14.5094
2029	Republic of Korea	Deaths	12.3946	10.0534	14.7357
2030	Republic of Korea	Deaths	12.3368	9.70445	14.9692
2031	Republic of Korea	Deaths	12.2791	9.34796	15.2102
2032	Republic of Korea	Deaths	12.2213	8.98373	15.4589
2033	Republic of Korea	Deaths	12.1636	8.61171	15.7155
2034	Republic of Korea	Deaths	12.1058	8.23189	15.9798
2035	Republic of Korea	Deaths	12.0481	7.84432	16.2519
2036	Republic of Korea	Deaths	11.9904	7.44907	16.5317
2037	Republic of Korea	Deaths	11.9326	7.04621	16.819
2038	Republic of Korea	Deaths	11.8749	6.63586	17.1139
2039	Republic of Korea	Deaths	11.8171	6.21811	17.4161
2040	Republic of Korea	Deaths	11.7594	5.79307	17.7257
2041	Republic of Korea	Deaths	11.7016	5.36085	18.0424
2022	Japan	Deaths	15.7918	15.4228	16.1608
2023	Japan	Deaths	15.6916	15.1698	16.2134
2024	Japan	Deaths	15.5914	14.9523	16.2304
2025	Japan	Deaths	15.4911	14.7532	16.2291
2026	Japan	Deaths	15.3909	14.5659	16.216
2027	Japan	Deaths	15.2907	14.3869	16.1945
2028	Japan	Deaths	15.1905	14.2143	16.1667
2029	Japan	Deaths	15.0903	14.0467	16.1339
2030	Japan	Deaths	14.9901	13.8831	16.097
2031	Japan	Deaths	14.8899	13.7231	16.0567
2032	Japan	Deaths	14.7896	13.5659	16.0134
2033	Japan	Deaths	14.6894	13.4113	15.9676
2034	Japan	Deaths	14.5892	13.2589	15.9196
2035	Japan	Deaths	14.489	13.1084	15.8696
2036	Japan	Deaths	14.3888	12.9598	15.8178
2037	Japan	Deaths	14.2886	12.8127	15.7645
2038	Japan	Deaths	14.1884	12.667	15.7097
2039	Japan	Deaths	14.0882	12.5227	15.6536
2040	Japan	Deaths	13.9879	12.3796	15.5963
2041	Japan	Deaths	13.8877	12.2376	15.5378
2022	China	DALYs	332.109	325.842	338.375
2023	China	DALYs	332.489	318.478	346.501
2024	China	DALYs	332.87	309.424	356.316
2025	China	DALYs	333.25	298.929	367.571
2026	China	DALYs	333.631	287.16	380.102
2027	China	DALYs	334.012	274.236	393.787
2028	China	DALYs	334.392	260.25	408.534
2029	China	DALYs	334.773	245.274	424.271
2030	China	DALYs	335.153	229.369	440.938
2031	China	DALYs	335.534	212.583	458.485
2032	China	DALYs	335.915	194.961	476.868
2033	China	DALYs	336.295	176.539	496.051
2034	China	DALYs	336.676	157.35	516.002
2035	China	DALYs	337.056	137.423	536.69
2036	China	DALYs	337.437	116.783	558.091
2037	China	DALYs	337.818	95.4546	580.181
2038	China	DALYs	338.198	73.4582	602.938
2039	China	DALYs	338.579	50.8133	626.344
2040	China	DALYs	338.959	27.5376	650.381
2041	China	DALYs	339.34	3.64767	675.032
2022	Australia	DALYs	307.82	293.713	321.928
2023	Australia	DALYs	300.181	280.23	320.133
2024	Australia	DALYs	292.543	268.108	316.978
2025	Australia	DALYs	284.904	256.689	313.119
2026	Australia	DALYs	277.265	245.719	308.81
2027	Australia	DALYs	269.626	235.07	304.182
2028	Australia	DALYs	261.987	224.662	299.312
2029	Australia	DALYs	254.348	214.446	294.25
2030	Australia	DALYs	246.709	204.387	289.032
2031	Australia	DALYs	239.07	194.458	283.682
2032	Australia	DALYs	231.431	184.642	278.221
2033	Australia	DALYs	223.792	174.923	272.662
2034	Australia	DALYs	216.154	165.288	267.019
2035	Australia	DALYs	208.515	155.729	261.3
2036	Australia	DALYs	200.876	146.238	255.514
2037	Australia	DALYs	193.237	136.807	249.667
2038	Australia	DALYs	185.598	127.431	243.765
2039	Australia	DALYs	177.959	118.106	237.812
2040	Australia	DALYs	170.32	108.827	231.813
2041	Australia	DALYs	162.681	99.5904	225.772
2022	Republic of Korea	DALYs	265.767	258.824	272.71
2023	Republic of Korea	DALYs	264.101	252.125	276.077
2024	Republic of Korea	DALYs	262.435	245.072	279.798
2025	Republic of Korea	DALYs	260.769	237.57	283.968
2026	Republic of Korea	DALYs	259.103	229.617	288.59
2027	Republic of Korea	DALYs	257.437	221.228	293.646
2028	Republic of Korea	DALYs	255.771	212.425	299.117
2029	Republic of Korea	DALYs	254.105	203.225	304.985
2030	Republic of Korea	DALYs	252.439	193.647	311.231
2031	Republic of Korea	DALYs	250.773	183.706	317.84
2032	Republic of Korea	DALYs	249.107	173.417	324.797
2033	Republic of Korea	DALYs	247.441	162.792	332.09
2034	Republic of Korea	DALYs	245.775	151.843	339.706
2035	Republic of Korea	DALYs	244.109	140.582	347.636
2036	Republic of Korea	DALYs	242.443	129.016	355.87
2037	Republic of Korea	DALYs	240.777	117.156	364.398
2038	Republic of Korea	DALYs	239.111	105.01	373.212
2039	Republic of Korea	DALYs	237.445	92.5839	382.306
2040	Republic of Korea	DALYs	235.779	79.8862	391.671
2041	Republic of Korea	DALYs	234.113	66.923	401.303
2022	Japan	DALYs	359.689	352.101	367.278
2023	Japan	DALYs	357.079	342.721	371.437
2024	Japan	DALYs	354.468	335.634	373.302
2025	Japan	DALYs	351.857	329.423	374.291
2026	Japan	DALYs	349.247	323.715	374.778
2027	Japan	DALYs	346.636	318.344	374.928
2028	Japan	DALYs	344.025	313.219	374.831
2029	Japan	DALYs	341.414	308.285	374.544
2030	Japan	DALYs	338.804	303.503	374.104
2031	Japan	DALYs	336.193	298.847	373.539
2032	Japan	DALYs	333.582	294.298	372.867
2033	Japan	DALYs	330.972	289.84	372.104
2034	Japan	DALYs	328.361	285.461	371.261
2035	Japan	DALYs	325.75	281.152	370.348
2036	Japan	DALYs	323.14	276.906	369.373
2037	Japan	DALYs	320.529	272.715	368.342
2038	Japan	DALYs	317.918	268.576	367.261
2039	Japan	DALYs	315.307	264.482	366.133
2040	Japan	DALYs	312.697	260.43	364.964
2041	Japan	DALYs	310.086	256.417	363.755
