# Supplementary material for: Temporal Trends, Projections, and Risk Attribution of Colorectal Cancer in Australia, China, Japan, and Korea: GBD 2021 Analysis (1990–2041)
Source: Research Square preprint supplement (doi:10.21203/rs.3.rs-7388179/v1), 2025-09-22
Supplement: Supplementary file 5 [file fc6ffc965a546c5a7fd90d57.xlsx]

## Sheet: Sheet1
Annual percent change（APC） among four countries from 1990 to 2021
Measure	location_name	Model	Segment	Segment.Start	Segment.End	val	lower	upper	APC.Significant	Test.Statistic	P.Value	APC
Prevalence	Australia	2	0	1990	1998	1.81	1.42	2.2	1	9.6058	0	1.81 (1.42 - 2.20)
		2	1	1998	2008	0.44	0.11	0.77	1	2.7862	0.010252	0.44 (0.11 - 0.77)
		2	2	2008	2021	-1.13	-1.36	-0.9	1	-10.1403	0	-1.13 (-1.36 - -0.90)
	China	3	0	1990	1997	0.98	0.73	1.24	1	8.1395	0	0.98 (0.73 - 1.24)
		3	1	1997	2011	3.78	3.7	3.86	1	100.307	0	3.78 (3.70 - 3.86)
		3	2	2011	2016	2.52	1.88	3.16	1	8.2739	0	2.52 (1.88 - 3.16)
		3	3	2016	2021	3.89	3.22	4.56	1	12.2692	0	3.89 (3.22 - 4.56)
	Japan	5	0	1990	1992	3.98	2.58	5.4	1	6.1372	1.9e-05	3.98 (2.58 - 5.40)
		5	1	1992	1997	1.2	0.76	1.64	1	5.828	3.3e-05	1.20 (0.76 - 1.64)
		5	2	1997	2002	-0.21	-0.69	0.27	0	-0.9229	0.370643	-0.21 (-0.69 - 0.27)
		5	3	2002	2009	0.56	0.28	0.84	1	4.3122	0.000616	0.56 (0.28 - 0.84)
		5	4	2009	2015	1.4	0.97	1.83	1	7.0398	4e-06	1.40 (0.97 - 1.83)
		5	5	2015	2021	-0.71	-1.06	-0.35	1	-4.2362	0.000719	-0.71 (-1.06 - -0.35)
	Republic of Korea	3	0	1990	1993	4.21	2.76	5.69	1	6.1155	5e-06	4.21 (2.76 - 5.69)
		3	1	1993	2007	5.98	5.84	6.12	1	91.3912	0	5.98 (5.84 - 6.12)
		3	2	2007	2013	0.98	0.41	1.56	1	3.5792	0.001768	0.98 (0.41 - 1.56)
		3	3	2013	2021	-0.7	-1.05	-0.35	1	-4.1167	0.000492	-0.70 (-1.05 - -0.35)
Incidence	Australia	2	0	1990	1997	1.28	0.77	1.8	1	5.1614	2.8e-05	1.28 (0.77 - 1.80)
		2	1	1997	2008	-0.56	-0.86	-0.25	1	-3.779	0.000919	-0.56 (-0.86 - -0.25)
		2	2	2008	2021	-1.2	-1.45	-0.95	1	-9.8414	0	-1.20 (-1.45 - -0.95)
	China	3	0	1990	1999	0.51	0.27	0.74	1	4.5335	0.000182	0.51 (0.27 - 0.74)
		3	1	1999	2012	2.22	2.1	2.35	1	38.3137	0	2.22 (2.10 - 2.35)
		3	2	2012	2015	0.85	-1.62	3.39	0	0.7099	0.48559	0.85 (-1.62 - 3.39)
		3	3	2015	2021	2.61	1.96	3.27	1	8.3673	0	2.61 (1.96 - 3.27)
	Japan	4	0	1990	1992	3.39	1.01	5.84	1	3.0026	0.007643	3.39 (1.01 - 5.84)
		4	1	1992	1998	0.91	0.36	1.47	1	3.4723	0.002719	0.91 (0.36 - 1.47)
		4	2	1998	2002	-1.45	-2.8	-0.09	1	-2.2339	0.038419	-1.45 (-2.80 - -0.09)
		4	3	2002	2016	0.7	0.53	0.86	1	8.8866	0	0.70 (0.53 - 0.86)
		4	4	2016	2021	-0.95	-1.75	-0.14	1	-2.4638	0.02405	-0.95 (-1.75 - -0.14)
	Republic of Korea	4	0	1990	1998	4.45	4.19	4.71	1	36.9069	0	4.45 (4.19 - 4.71)
		4	1	1998	2003	1.81	1.1	2.52	1	5.4033	3.9e-05	1.81 (1.10 - 2.52)
		4	2	2003	2006	6.71	4.58	8.89	1	6.7559	2e-06	6.71 (4.58 - 8.89)
		4	3	2006	2011	1.18	0.51	1.86	1	3.6969	0.00165	1.18 (0.51 - 1.86)
		4	4	2011	2021	-0.87	-1.08	-0.65	1	-8.4451	0	-0.87 (-1.08 - -0.65)
Deaths	Australia	4	0	1990	1994	-0.66	-1.67	0.35	0	-1.3758	0.185758	-0.66 (-1.67 - 0.35)
		4	1	1994	2001	-1.84	-2.35	-1.33	1	-7.5524	1e-06	-1.84 (-2.35 - -1.33)
		4	2	2001	2005	-3.27	-4.9	-1.61	1	-4.1071	0.000662	-3.27 (-4.90 - -1.61)
		4	3	2005	2013	-1.97	-2.45	-1.49	1	-8.5246	0	-1.97 (-2.45 - -1.49)
		4	4	2013	2021	-1.06	-1.5	-0.6	1	-4.898	0.000116	-1.06 (-1.50 - -0.60)
	China	5	0	1990	1998	-0.74	-0.88	-0.59	1	-10.902	0	-0.74 (-0.88 - -0.59)
		5	1	1998	2004	0.2	-0.03	0.43	0	1.8239	0.08815	0.20 (-0.03 - 0.43)
		5	2	2004	2007	-2.35	-3.24	-1.46	1	-5.5467	5.6e-05	-2.35 (-3.24 - -1.46)
		5	3	2007	2011	0.36	-0.17	0.9	0	1.4641	0.163814	0.36 (-0.17 - 0.90)
		5	4	2011	2014	-1.75	-2.94	-0.54	1	-3.083	0.007575	-1.75 (-2.94 - -0.54)
		5	5	2014	2021	0.4	0.15	0.65	1	3.4248	0.003762	0.40 (0.15 - 0.65)
	Japan	3	0	1990	1992	1.11	-0.36	2.6	0	1.5625	0.133122	1.11 (-0.36 - 2.60)
		3	1	1992	2009	-0.92	-1	-0.85	1	-26.5644	0	-0.92 (-1.00 - -0.85)
		3	2	2009	2013	0.61	-0.52	1.75	0	1.1142	0.277768	0.61 (-0.52 - 1.75)
		3	3	2013	2021	-0.9	-1.16	-0.63	1	-7.0912	1e-06	-0.90 (-1.16 - -0.63)
	Republic of Korea	2	0	1990	2000	0.59	0.41	0.78	1	6.6757	1e-06	0.59 (0.41 - 0.78)
		2	1	2000	2006	-0.29	-0.77	0.19	0	-1.24	0.226957	-0.29 (-0.77 - 0.19)
		2	2	2006	2021	-1.27	-1.38	-1.16	1	-23.8678	0	-1.27 (-1.38 - -1.16)
DALYs	Australia	2	0	1990	1996	-1.04	-1.66	-0.41	1	-3.418	0.002255	-1.04 (-1.66 - -0.41)
		2	1	1996	2012	-2.56	-2.71	-2.4	1	-33.1378	0	-2.56 (-2.71 - -2.40)
		2	2	2012	2021	-0.94	-1.37	-0.51	1	-4.4684	0.000161	-0.94 (-1.37 - -0.51)
	China	5	0	1990	1998	-1.11	-1.23	-0.99	1	-20.3123	0	-1.11 (-1.23 - -0.99)
		5	1	1998	2004	-0.26	-0.44	-0.08	1	-3.0425	0.008229	-0.26 (-0.44 - -0.08)
		5	2	2004	2007	-2.3	-3.01	-1.58	1	-6.7719	6e-06	-2.30 (-3.01 - -1.58)
		5	3	2007	2011	0.27	-0.16	0.7	0	1.3431	0.199216	0.27 (-0.16 - 0.70)
		5	4	2011	2014	-1.43	-2.42	-0.44	1	-3.0584	0.007965	-1.43 (-2.42 - -0.44)
		5	5	2014	2021	0.56	0.36	0.77	1	5.8998	2.9e-05	0.56 (0.36 - 0.77)
	Japan	5	0	1990	1992	1.28	0.05	2.52	1	2.226	0.041771	1.28 (0.05 - 2.52)
		5	1	1992	2005	-0.99	-1.08	-0.9	1	-24.5073	0	-0.99 (-1.08 - -0.90)
		5	2	2005	2009	-1.56	-2.38	-0.73	1	-3.9873	0.00119	-1.56 (-2.38 - -0.73)
		5	3	2009	2012	1.03	-0.71	2.8	0	1.2577	0.227728	1.03 (-0.71 - 2.80)
		5	4	2012	2016	-0.54	-1.46	0.38	0	-1.2556	0.228474	-0.54 (-1.46 - 0.38)
		5	5	2016	2021	-1.36	-1.81	-0.91	1	-6.4015	1.2e-05	-1.36 (-1.81 - -0.91)
	Republic of Korea	4	0	1990	1994	1.05	0.44	1.67	1	3.6183	0.001966	1.05 (0.44 - 1.67)
		4	1	1994	2005	-0.27	-0.4	-0.14	1	-4.417	0.000333	-0.27 (-0.40 - -0.14)
		4	2	2005	2010	-0.75	-1.25	-0.26	1	-3.181	0.005174	-0.75 (-1.25 - -0.26)
		4	3	2010	2017	-2.36	-2.67	-2.06	1	-16.2801	0	-2.36 (-2.67 - -2.06)
		4	4	2017	2021	-1.31	-2.03	-0.58	1	-3.7465	0.001477	-1.31 (-2.03 - -0.58)
